# Supplementary material for: A count-based decision method for target blood pressure achievement in home blood pressure monitoring data interpretation for clinical practices
Source: Sci Rep. 2022 Mar 10;12:3897. doi: 10.1038/s41598-022-04913-9 (PMC8913602; doi:10.1038/s41598-022-04913-9)
Supplement: Supplementary file 2 — Supplementary Information 2. [file 41598_2022_4913_MOESM2_ESM.xlsx]

## Sheet: SBP_K16
Result	ID	SBP01	SBP02	SBP03	SBP04	SBP05	SBP06	SBP07	SBP08	SBP09	SBP10	SBP11	SBP12	SBP13	SBP14	SBP15	SBP16	SBP17	SBP18	SBP19	SBP20	SBP21	SBP22	SBP23	SBP24
SD=5	Sim00	139.816	139.281	133.387	142.869	129.953	133.13	130.625	124.254	136.747	133.125	138.004	127.424	133.208	128.392	134.563	135.589	131.309	127.867	129.435	125.618	137.179	130.744	128.77	144.709
SD=5	Sim01	123.787	134.297	124.144	135.325	133.035	133.279	137.561	132.482	133.12	126.443	127.967	131.428	124.143	131.441	132.698	131.45	141.909	131.483	133.623	117.747	135.011	134.44	130.97	123.336
SD=5	Sim02	125.542	141.886	133.407	130.062	125.829	131.186	139.506	135.702	131.672	138.727	138.714	131.654	130.325	138.162	129.947	136.256	133.579	134.865	131.483	135.09	143.537	127.917	123.681	144.158
SD=5	Sim03	132.458	144.659	132.588	137.73	140.373	135.71	129.208	138.365	137.421	130.908	134.014	130.454	133.38	134.958	139.934	135.345	133.361	146.605	134.204	132.16	144.132	138.213	136.905	134.663
SD=5	Sim04	129.158	137.402	121.248	125.081	131.953	127.758	134.981	139.207	133.924	132.747	132.038	134.023	133.041	128.593	133.871	127.415	127.968	134.05	132.287	132.82	135.498	131.237	132.666	138.881
SD=5	Sim05	132.913	133.538	140.42	138.755	119.42	132.26	136.004	129.239	140.123	137.616	141.119	138.257	139.333	134.176	139.474	135.206	132.993	138.929	133.872	140.183	132.472	131.397	144.209	134.43
SD=5	Sim06	138.054	142.125	138.645	135.348	136.008	140.682	134.651	131.315	137.297	142.652	135.658	143.027	148.012	130.409	141.762	136.681	137.827	141.474	144.279	141.519	140.263	139.964	137.853	131.895
SD=5	Sim07	131.854	137.601	144.72	132.496	126.476	142.772	131.592	127.872	136.172	135.489	130.515	138.668	137.951	130.617	135.437	124.974	134.49	137.817	133.568	130.035	130.367	129.541	130.619	133.945
SD=5	Sim08	131.533	133.271	136.432	142.21	136.915	138.599	141.729	127.307	146.405	135.094	135.181	125.058	134.514	133.746	125.07	132.423	140.275	139.486	137.34	131.338	132.386	142.374	133.444	138.134
SD=5	Sim09	134.449	139.245	125.481	119.542	142.202	132.242	134.967	129.211	129.674	131.468	130.023	122.63	126.447	125.386	123.173	125.18	128.686	123.173	140.221	129.312	133.895	131.946	130.31	133.894
SD=5	Sim10	132.237	138.794	134.854	137.25	145.204	137.828	131.816	137.788	138.4	137.478	145.06	148.601	137.554	138.279	128.042	132.628	130.545	135.678	134.147	139.614	133.474	149.497	139.724	131.469
SD=5	Sim11	146.403	137.859	130.615	139.43	138.66	130.489	131.314	134.367	140.349	134.451	137.355	130.894	134.6	139.329	139.539	136.532	130.09	135.693	140.435	128.897	139.796	135.727	128.876	138.36
SD=5	Sim12	139.083	128.136	127.782	131.973	137.043	135.682	135.265	134.681	148.932	134.113	133.016	129.747	131.881	139.656	132.131	131.586	148.554	132.269	138.838	143.887	137.306	134.799	142.122	141.714
SD=5	Sim13	140.889	127.193	134.243	131.65	137.362	140.523	143.666	137.263	140.597	139.098	127.624	142.479	141.554	136.136	130.529	131.425	129.062	139.057	134.675	131.768	132.183	129.848	133.882	136.804
SD=5	Sim14	136.235	136.093	139.469	141.043	135.552	132.862	141.684	134.643	142.167	144.925	143.624	135.818	135.08	138.508	130.361	148.463	136.338	143.393	136.128	141.661	143.451	141.161	142.504	140.999
SD=5	Sim15	128.094	129.687	129.598	128.313	130.054	118.973	128.328	133.809	130.121	131.141	133.376	134.595	137.258	142.915	133.135	129.087	137.017	134.967	126.869	131.362	125.632	133.204	135.139	133.286
SD=5	Sim16	129.433	137.445	136.533	125.821	134.188	138.773	137.897	130.121	128.399	133.819	138.265	138.598	135.859	138.561	137.89	147.941	132.099	141.548	130.534	138.604	138.197	131.433	136.846	137.457
SD=5	Sim17	132.448	132.797	128.8	131.897	130.775	135.465	126.462	123.45	131.867	128.841	131.54	128.882	133.168	132.217	138.602	127.566	134.834	127.276	140.246	122.987	140.092	128.412	131.245	132.469
SD=5	Sim18	133.772	143.344	138.056	138.098	146.842	139.082	141.468	143.928	138.013	139.7	146.307	141.011	144.862	140.329	140.364	146.332	144.864	131.871	144.618	138.751	136.889	138.35	138.694	133.964
SD=5	Sim19	137.463	126.438	129.29	137.68	122.525	137.245	135.709	135.828	135.823	131.793	131.246	138.056	132.149	134.104	131.816	140.404	138.291	134.604	135.421	130.877	134.151	134.187	127.327	139.431
SD=5	Sim20	140.03	137.486	128.172	132.063	128.797	126.961	131.397	126.376	131.878	124.969	128.764	123.002	132.662	131.508	131.718	128.728	139.641	134.073	133.633	129.666	135.364	136.588	134.488	133.435
SD=5	Sim21	143.853	138.579	136.784	136.978	142.202	136.831	143.648	136.95	137.494	143.302	143.195	138.891	144.405	127.794	136.851	126.953	138.676	134.687	124.965	138.492	140.926	131.265	132.413	143.592
SD=5	Sim22	143.051	126.588	145.801	139.007	140.134	143.561	133.999	143.345	143.351	138.809	139.08	141.779	149.378	142.062	132.524	141.545	145.671	138.356	143.104	139.826	136.714	141.016	141.27	150.318
SD=5	Sim23	144.316	138.761	137.853	138.958	134.919	143.308	140.687	134.859	138.45	136.652	136.351	148.054	140.393	143.042	137.271	137.054	140.303	139.119	130.258	145.944	138.109	141.229	139.196	149.94
SD=5	Sim24	136.602	136.969	139.015	135.908	134.85	126.592	140.341	140.545	144.171	130.319	145.448	133.774	144.559	137.287	132.15	133.805	132.418	130.37	135.961	135.781	146.929	138.709	139.663	137.72
SD=5	Sim25	129.972	131.799	138.124	129.752	126.488	134.269	133.104	130.207	139.227	131.606	128.549	134.043	131.787	127.978	131.062	131.661	135.142	134.975	130.217	138.13	129.282	129.914	131.418	133.598
SD=5	Sim26	134.264	139.491	133.869	139.891	132.617	133.395	138.724	148.003	131.6	123.541	134.224	139.196	137.109	133.806	135.132	139.656	133.017	141.776	141.726	143.51	141.185	135.406	136.866	134.618
SD=5	Sim27	129.202	133.258	135.894	126.506	127.387	121.873	119.343	138.033	131.304	130.071	133.056	132.471	135.878	131.295	134.475	126.815	121.168	138.288	138.761	136.68	131.024	138.401	125.656	124.657
SD=5	Sim28	139.015	136.037	135.747	143.532	129.096	141.061	133.126	132.409	138.512	134.692	136.624	139.818	143.974	146.976	126.606	138.634	132.373	139.479	139.747	138.084	141.292	139.812	135.289	133.58
SD=5	Sim29	125.751	133.121	140.968	137.226	135.161	134.192	143.383	144.96	150.145	144.268	130.489	130.395	137.216	131.331	131.415	133.998	136.652	139.659	140.998	139.98	137.394	126.998	142.329	139.083
SD=5	Sim30	129.549	133.309	122.572	122.958	129.622	124.24	131.618	133.953	134.84	131.932	125.955	132.473	124.92	125.036	131.955	125.641	128.982	129.377	133.719	130.642	142.129	125.763	140.399	129.485
SD=5	Sim31	135.092	131.596	140.34	130.493	141.335	140.939	131.532	141.224	130.883	136.741	131.367	134.966	138.127	138.655	132.668	132.609	136.037	127.559	137.194	146.291	131.066	137.276	134.643	130.533
SD=5	Sim32	128.878	126.365	129.459	129.142	131.38	126.414	138.551	127.321	128.878	132.581	130.193	132.284	126.199	137.493	125.546	132.879	128.71	138.162	129.17	118.986	127.467	125.701	135.39	133.97
SD=5	Sim33	138.864	153.418	138.939	143.264	133.267	137.863	145.707	134.211	141.543	146.075	135.861	144.812	143.322	132.647	136.842	132.139	136.652	136.481	133.459	135.314	138.2	125.903	134.08	135.988
SD=5	Sim34	132.753	130.891	126.81	126.496	127.776	135.777	132.645	139.775	130.032	132.971	133.196	140.955	140.239	121.861	140.302	135.369	138.083	133.13	129.247	131.515	138.26	137.717	127.94	133.713
SD=5	Sim35	127.919	136.038	123.562	133.927	135.281	138.817	132.144	138.199	133.67	131.113	139.582	132.664	135.005	123.839	137.764	136.118	130.679	129.629	135.8	132.867	135.302	123.249	138.256	128.028
SD=5	Sim36	136.501	135.117	133.779	145.383	138.792	129.775	133.106	139.337	139.09	141.646	138.443	137.315	138.548	139.072	137.809	129.72	134.554	134.297	134.4	143.628	136.323	142.292	145.864	133.262
SD=5	Sim37	131.5	134.638	137.421	131.693	134.714	124.994	133.536	127.015	132.505	133.553	134.729	135.164	135.324	129.376	122.858	123.602	131.902	126.777	141.722	117.055	131.796	131.194	127.946	137.099
SD=5	Sim38	132.776	134.485	141.819	141.238	135.371	127.972	136.237	139.136	133.023	124.75	132.833	139.817	135.388	133.109	131.696	132.459	135.282	131.917	138.939	138.09	129.731	146.585	134.144	136.99
SD=5	Sim39	134.05	133.586	130.932	114.622	132.158	124.993	132.963	136.586	139.055	130.615	127.403	135.296	127.982	138.317	121.552	134.041	131.18	137.94	134.588	129.045	128.009	125.345	135.624	132.161
SD=5	Sim40	131.647	136.588	134.021	134.929	144.069	135.228	136.685	137.089	135.661	132.994	131.25	136.47	140.288	126.244	148.343	132.728	137.193	136.69	132.835	144.264	130.624	137.498	146.731	136.044
SD=5	Sim41	139.485	125.795	151.681	143.85	140.912	145.164	139.593	130.996	138.208	137.783	137.86	137.966	134.868	136.414	141	144.104	139.775	140.737	131.207	145.045	137.385	130.623	138.209	142.87
SD=5	Sim42	138.629	136.949	133.014	141.697	141.415	131.761	139.74	135.999	127.295	123.707	136.447	130.158	128.62	129.428	125.14	123.753	134.81	131.994	127.666	130.842	143.886	121.088	138.174	137.13
SD=5	Sim43	141.173	132.877	139.353	133.531	136.306	134.88	138.745	139.953	137.193	135.951	131.53	139.903	132.69	146.156	135.131	133.897	143.642	128.688	136.306	132.841	131.53	140.048	131.907	145.816
SD=5	Sim44	139.076	133.97	142.013	129.012	133.525	135.192	130.587	139.931	141.17	145.132	137.404	132.851	134.681	134.111	134.275	142.212	144.171	131.397	128.748	135.726	140.203	144.459	132.607	140.16
SD=5	Sim45	142.899	135	134.001	138.293	134.526	140.96	138.541	143.927	137.601	141.326	139.223	143.075	135.894	144.575	130.249	129.647	142.413	145.225	133.497	141.274	140.969	141.064	136.074	139.615
SD=5	Sim46	136.863	133.618	142.845	137.462	138.228	132.334	144.192	149.358	121.625	137.725	144.681	133.369	139.8	148.13	139.431	136.909	137.67	135.105	134.787	133.722	139.046	142.456	140.328	136.144
SD=5	Sim47	126.388	136.509	124.633	130.106	129.744	124.259	132.953	131.86	133.52	131.86	124.995	126.792	125.66	133.711	133.025	137.217	126.774	130.295	141.387	129.418	134.394	127.191	128.964	136.951
SD=5	Sim48	134.82	133.937	140.361	133.999	138.868	128.824	138.426	133.055	132.215	131.062	133.233	138.878	127.544	140.302	122.764	130.81	128.705	130.168	126.501	138.644	128.977	139.693	129.81	135.474
SD=5	Sim49	135.389	135.3	130.054	134.026	133.196	134.342	138.386	138.717	137.954	144.705	131.682	131.173	142.255	134.743	132.968	133.477	140.476	138.937	137.973	128.39	132.493	129.641	139.564	135.943
SD=5	Sim50	142.21	142.324	139.53	130.381	140.394	146.309	136.449	140.894	139.281	138.626	134.441	143.258	138.674	138.255	137.561	141.22	147.29	132.639	140.471	133.078	138.488	136.088	136.188	135.016
SD=5	Sim51	133.386	128.206	124.855	133.235	131.365	134.334	126.312	142.282	127.365	122.64	140.181	136.53	128.189	135.029	128.32	140.813	131.102	141.097	131.615	126.859	129.393	133.32	126.731	141.782
SD=5	Sim52	136.146	131.712	135.98	137.569	138.26	136.69	134.415	130.722	136.637	129.154	131.665	136.093	138.741	138.586	136.78	138.84	138.573	141.559	136.377	133.327	131.091	132.422	129.132	135.324
SD=5	Sim53	137.07	146.558	140.225	138.2	130.96	133.032	138.751	130.554	131.904	137.496	136.224	146.019	136.19	131.01	133.106	122.627	140.894	140.363	137.658	143.112	122.535	140.667	140.321	145.12
SD=5	Sim54	128.654	140.244	133.754	149.17	134.645	139.416	143.176	141.734	134.363	134.623	137.582	128.126	139.901	146.402	137.152	140.761	130.288	128.661	134.215	143.164	142.277	133.811	144.4	138.345
SD=5	Sim55	134.474	137.264	125.474	125.547	133.153	133.694	133.531	127.089	133.542	136.802	132.571	124.912	121.345	138.765	127.445	134.373	133.29	129.037	135.902	132.792	121.709	129.636	141.546	135.952
SD=5	Sim56	136.26	135.256	128.955	133.632	133.364	129.876	130.664	131.884	131.474	127.727	132.267	138.52	131.636	141.172	133.401	132.189	134.39	136.564	123.381	125.99	124.63	125.901	134.108	129.272
SD=5	Sim57	119.801	131.49	124.738	130.757	141.087	131.453	131.898	127.956	129.531	127.932	130.966	131.52	124.309	126.325	132.47	119.889	130.959	124.705	127.756	141.466	135.048	126.268	134.569	136.565
SD=5	Sim58	136.52	139.939	139.801	131.836	134.99	128.934	135.894	132.982	129.068	137.497	141.347	143.387	139.875	141.081	133.147	141.819	137.436	142.549	135.769	138.05	146.456	131.685	132.121	139.847
SD=5	Sim59	136.098	139.445	139.424	145.657	141.801	142.273	138.087	138.349	141.974	140.685	125.704	137.138	139.049	139.387	137.116	140.753	136.948	136.58	144.086	149.197	138.052	134.827	134.874	140.461
SD=5	Sim60	138.13	136.755	135.07	133.054	135.698	135.926	135.682	128.767	129.046	134.149	131.691	132.7	134.715	134.421	133.807	127.889	123.93	136.086	127.018	120.242	128.586	133.946	138.401	127.096
SD=5	Sim61	130.729	124.045	140.235	128.726	130.357	131.047	131.831	136.588	135.111	136.03	139.97	127.971	134.908	136.09	137.459	140.482	147.142	138.068	136.988	132.262	132.847	135.954	118.693	128.047
SD=5	Sim62	132.564	144.436	128.553	136.962	128.911	137.167	137.754	132.372	130.647	134.627	136.209	139.695	128.704	141.105	140.607	137.171	135.16	135.671	129.49	128.845	128.114	140.167	130.663	138.42
SD=5	Sim63	138.678	127.617	130.769	125.634	135.646	132.175	125.529	129.73	127.493	122.859	131.889	138.077	136.106	135.111	128.118	126.842	143.196	129.798	133.875	134.235	128.532	124.195	132.992	136.556
SD=5	Sim64	135.191	133.821	128.28	126.108	128.102	123.738	139.296	135.791	135.913	134.699	129.365	130.784	136.824	136.002	132.668	125.414	134.117	129.97	122.461	135.145	143.14	134.841	128.231	141.631
SD=5	Sim65	132.324	133.045	124.853	135.577	139.582	130.961	133.793	140.455	138.756	131.293	127.564	126.646	130.231	130.792	130.772	134.468	128.571	135.929	129.762	132.996	133.11	133.095	128.484	127.781
SD=5	Sim66	131.315	144.406	136.685	129.874	139.439	138.123	138.207	127.686	137.385	140.803	139.939	136.448	132.914	147.169	142.959	133.671	135.902	144.69	143	137.955	139.523	129.59	138.374	142.527
SD=5	Sim67	136.761	132.54	133.13	128.112	135.209	132.415	131.941	132.776	132.977	133.238	136.364	131.362	121.81	127.314	133.921	134.318	129.726	129.835	126.626	127.505	141.807	136.521	136.317	129.966
SD=5	Sim68	141.41	141.212	142.562	137.739	133.081	129.428	130.924	135.463	143.326	139.948	139.563	137.359	132.908	131.572	142.275	136.872	131.801	135.851	135.409	133.324	133.349	135.736	134.78	130.587
SD=5	Sim69	125.182	130.113	126.884	136.906	132.43	137.495	125.902	135.785	132.939	138.338	135.73	143.833	129.657	128.823	136.001	138.14	135.417	130.088	133.716	128.733	134.421	133.318	144.412	131.709
SD=5	Sim70	129.374	132.345	132.419	133.344	126.777	132.255	128.478	143.39	142.053	129.169	135.455	135.922	133.402	119.255	136.005	129.724	131.608	125.7	139.988	129.618	133.023	131.91	137.341	132.552
SD=5	Sim71	141.88	145.888	133.001	126.713	132.46	142.466	139.383	133.791	133.801	137.307	133.954	134.823	140.493	143.493	129.564	138.663	121.461	136.487	126.923	132.705	141.011	129.375	135.689	132.78
SD=5	Sim72	140.111	134.579	140.404	140.028	136.405	135.931	141.286	143.25	142.399	139.976	139.51	143.727	149.606	138.272	142.301	132.998	143.525	141.582	149.517	131.407	132.527	135.187	134.502	137.705
SD=5	Sim73	134.454	133.808	137.056	136.998	128.565	137.622	132.718	131.558	132.17	139.176	136.114	138.045	135.467	136.97	137.808	140.983	141.502	135.719	126.238	147.283	137.583	131.431	128.472	130.073
SD=5	Sim74	134.709	136.603	133.295	131.249	139.103	133.568	133.378	142.624	139.859	138.794	137.081	134.219	140.537	130.804	131.759	136.923	134.242	129.408	148.985	145.106	140.469	143.746	129.863	135.859
SD=5	Sim75	133.603	137.758	135.622	135.025	136.779	129.782	127.311	138.326	132.182	129.818	140.08	139.998	129.114	140.71	135.815	124.441	133.159	137.952	134.093	136.452	141.373	130.295	137.141	149.858
SD=5	Sim76	136.396	129.058	121.455	140.259	124.394	132.461	133.133	125.335	127.972	126.788	136.791	132.665	131.106	135.677	127.936	130.629	126.296	130.717	130.451	132.278	126.383	133.95	127.874	126.815
SD=5	Sim77	134.714	132.123	138.121	137.977	139.469	131.149	125.75	135.995	130.699	130.2	134.173	138.135	130.795	133.645	137.855	129.729	137.089	128.402	130.418	137.094	132.091	135.467	138.656	140.113
SD=5	Sim78	143.398	138.571	140.622	136.764	138.268	134.458	140.45	144.19	135.845	130.507	134.555	140.638	142.761	140.282	145.185	142.016	137.435	141.114	135.512	135	143.246	139.658	138.362	136.837
SD=5	Sim79	131.388	127.31	147.318	140.124	125.015	133.256	131.615	139.686	129.574	131.126	128.652	135.189	128.384	132.646	141.729	137.451	133.2	126.689	130.907	140.092	133.607	135.296	141.928	144.144
SD=5	Sim80	126.903	125.784	131.755	127.646	136.045	133.881	122.547	125.113	124.503	132.128	126.776	127.797	128.286	135.195	120.89	136.998	122.04	131.359	130.253	135.865	130.378	122.577	127.319	123.314
SD=5	Sim81	133.648	142.252	143.927	147.662	144.282	132.337	135.753	130.845	142.698	128.653	134.863	142.86	145.125	137.611	129.372	133.6	139.274	134.476	141.643	140.798	137.202	141.538	132.866	143.103
SD=5	Sim82	137.757	139.303	132.908	147.732	148.917	138.778	133.575	140.327	144.538	144.9	133.613	133.912	129.23	135.37	136.411	133.183	130.329	123.704	131.798	140.284	141.435	134.659	129.123	133.554
SD=5	Sim83	124.285	134.918	120.621	134.19	139.138	121.124	130.715	132.711	131.055	136.056	133.161	126.14	139.995	134.772	135.039	128.843	139.302	130.696	134.753	129.061	132.041	121.453	135.131	134.133
SD=5	Sim84	138.439	132.144	141.173	124.33	137.288	135.361	126.769	124.779	135.077	126.634	125.179	138.412	129.982	135.329	144.481	122.832	138.416	125.81	127.964	129.414	130.495	139.982	137.076	125.059
SD=5	Sim85	134.056	135.573	138.116	129.119	129.094	128.175	139.557	128.882	128.156	134.461	140.474	131.844	138.649	142.515	131.961	137.159	140.816	129.163	138.432	132.64	134.424	136.323	141.366	137.622
SD=5	Sim86	131.842	139.817	140.284	129.943	138.77	129.428	124.231	137.867	136.048	134.51	136.218	132.395	135.719	131.947	133.088	136.121	137.985	146.587	148.976	128.306	135.975	128.832	125.275	136.357
SD=5	Sim87	139.723	132.998	136.708	136.559	136.482	142.85	136.937	144.727	134.009	145.374	131.399	144.928	128.324	137.29	138.521	133.316	134.138	137.047	132.567	155.008	137.308	137.574	136.095	135.031
SD=5	Sim88	145.849	145.796	146.808	148.15	134.097	141.12	137.378	133.804	151.043	144.322	128.892	142.379	136.688	140.419	138.441	137.689	132.399	135.166	128.13	147.391	132.449	140.845	131.049	137.137
SD=5	Sim89	132.501	137.15	127.518	130.559	132.342	125.608	121.591	131.218	123.395	129.228	137.284	131.625	132.415	129.29	128.447	127.341	128.619	122.955	123.599	128.969	122.289	133.697	128.032	134.794
SD=5	Sim90	142.923	147.864	136.017	131.788	137.68	147.25	136.446	138.639	128.159	134.9	130.551	131.49	139.055	142.264	136.615	148.798	149.198	144.395	135.567	134.671	138.045	133.859	135.07	139.312
SD=5	Sim91	123.839	131.055	133.044	135.37	132.95	135.493	143.534	127.871	136.66	131.868	131.584	125.964	127.163	136.456	136.328	133.605	129.113	134.177	130.986	129.435	134.937	145.176	138.089	130.2
SD=5	Sim92	126.964	123.883	126.623	126.17	140.288	124.159	132.188	132.844	135.338	134.619	123.827	130.254	132.726	125.704	130.352	134.197	125.378	127.142	131.151	120.847	128.11	131.796	128.389	132.853
SD=5	Sim93	135.379	136.986	134.227	124.231	129.578	134.327	133.744	131.319	132.599	130.334	131.231	128.83	144.287	126.739	137.599	138.002	142.148	133.977	133.466	115.313	137.812	135.287	135.079	141.407
SD=5	Sim94	146.576	131.784	133.509	137.921	132.572	133.47	143.641	136.35	141.076	141.254	130.655	142.214	136.177	140.104	138.94	147.831	140.195	137.413	132.798	136.005	134.741	144.219	135.23	134.642
SD=5	Sim95	133.292	137.432	142.785	121.803	127.85	128.331	136.414	123.326	130.074	143.796	126.372	127.737	142.418	132.934	136.61	137.98	137.361	136.065	126.889	125.771	130.254	125.735	129.073	132.4
SD=5	Sim96	144.939	133.759	140.555	129.692	135.824	137.08	131.162	135.895	134.602	133.726	127.576	130.356	135.328	135.794	130.231	138.026	130.787	139.963	130.129	128.297	129.406	126.343	143.524	138.409
SD=5	Sim97	137.319	134.441	128.01	125.511	127.699	134.913	132.639	137.248	136.82	128.499	134.843	136.444	121.114	133.272	125.914	127.982	125.487	122.197	128.635	134.705	134.273	135.737	130.043	126.085
SD=5	Sim98	129.411	137.493	134.049	139.679	138.576	139.184	144.479	135.357	129.324	139.229	133.162	138.137	128.164	137.744	131.315	139.15	145.787	137.605	130.472	142.594	137.463	132.907	145.612	139.46
SD=5	Sim99	124.919	129.543	135.516	128.179	136.671	131.348	138.152	134.678	127.303	135.791	130.416	137.762	134.175	134.198	123.553	141.792	132.865	134.736	129.634	129.344	137.396	133.432	137.28	133.933
Result	ID	SBP01	SBP02	SBP03	SBP04	SBP05	SBP06	SBP07	SBP08	SBP09	SBP10	SBP11	SBP12	SBP13	SBP14	SBP15	SBP16	SBP17	SBP18	SBP19	SBP20	SBP21	SBP22	SBP23	SBP24
SD=10	Sim00	133.238	142.544	123.216	141.993	147.991	144.936	124.626	137.768	128.502	136.074	159.912	131.481	127.121	138.471	110.383	140.519	133.199	136.763	138.023	125.94	133.358	141.883	134.381	118.462
SD=10	Sim01	117.513	142.063	122.522	116.703	133.453	147.551	144.735	126.645	130.208	148.061	99.9713	131.012	134.766	115.357	136.156	163.69	138.559	122.691	127.405	112.987	122.464	141.634	134.192	142.667
SD=10	Sim02	136.169	132.348	137.418	138.421	142.646	131.261	135.602	133.06	135.554	125.139	121.894	143.322	128.2	126.451	124.325	141.231	138.643	127.437	117.387	137.001	131.011	148.073	153.227	136.207
SD=10	Sim03	130.312	136.895	134.291	117.984	135.497	135.099	148.394	123.103	150.194	128.808	118.795	137.737	148.628	135.044	130.487	138.179	123.414	133.869	131.308	135.814	127.728	137.971	131.83	125.781
SD=10	Sim04	134.24	130.093	106.792	119.332	127.414	140.943	114.072	137.949	148.486	133.126	124.857	135.125	138.609	147.251	121.061	133.013	131.234	134.764	107.79	121.946	115.079	112.04	134.563	120.712
SD=10	Sim05	124.327	127.076	128.085	147.344	128.537	124.919	113.966	134.89	148.553	135.423	130.396	139.09	138.818	117.438	136.924	140.674	141.059	139.926	126.422	138.097	140.28	139.317	120.912	139.363
SD=10	Sim06	145.498	133.895	132.141	150.025	143.026	130.947	133.094	159.679	118.125	144.339	151.881	130.14	135.29	133.323	138.944	143.979	133.597	131.708	137.188	155.607	148.529	162.458	141.623	123.317
SD=10	Sim07	140.083	132.801	145.422	126.132	134.267	140.374	139.272	140.781	136.394	124.659	121.788	142.49	116.433	146.023	148.093	133.649	133.966	146.46	141.377	138.526	124.212	138.739	128.579	145.044
SD=10	Sim08	122.681	142.149	138.995	145.425	150.725	141.172	137.224	140.423	124.908	128.733	135.39	134.448	133.488	127.938	131.684	132.878	153.68	135.308	143.713	134.684	153.916	148.663	146.476	146.662
SD=10	Sim09	137.513	136.13	133.876	132.119	139.82	133.834	130.158	139.94	121.343	126.43	133.985	120.966	138.262	152.26	111.131	123.861	117.659	130.849	141.045	124.85	117.058	131.774	121.157	115.362
SD=10	Sim10	125.623	134.238	138.48	137.109	150.834	135.404	131.108	139.339	144.832	138.961	129.301	143.265	133.549	148.331	152.563	154.865	139.573	147.867	148.991	137.098	141.278	127.051	138.709	149.541
SD=10	Sim11	134.844	127.737	135.923	132.108	134.664	158.582	138.783	133.215	136.824	152.254	157.141	141.071	129.065	134.208	141.874	119.232	130.652	153.934	135.368	140.799	139.526	158.211	147.782	134.933
SD=10	Sim12	129.278	124.909	134.308	143.878	133.438	139.779	137.37	147.838	110.886	128.303	135.387	117.936	137.847	131.075	141.806	132.345	152.924	132.595	143.013	130.538	134.469	141.207	136.929	136.052
SD=10	Sim13	140.153	132.016	122.255	127.258	122.667	126.635	130.382	128.553	140.591	131.955	129.331	127.149	139.183	123.1	128.873	139.182	123.332	146.574	142.845	142.268	130.526	131.766	131.629	142.822
SD=10	Sim14	138.502	133.658	134.308	123.7	133.535	131.048	123.617	143.27	147.526	149.789	135.114	110.553	151.477	132.839	133.42	130.912	134.946	144.194	139.819	139.217	140.165	143.902	132.358	150.63
SD=10	Sim15	135.392	129.67	121.838	124.617	128.515	140.721	145.825	144.378	128.181	144.456	131.068	137.304	138.014	125.76	144.762	129.968	127.452	127.979	137.481	132.144	121.543	124.147	141.603	121.784
SD=10	Sim16	123.747	136.247	137.059	160.394	127.41	123.427	138.46	125.934	122.546	119.154	130.939	139.324	154.474	147.298	138.979	132.192	131.839	138.875	140.295	149.009	152.19	132.476	141.497	127.659
SD=10	Sim17	137.553	140.115	125.292	145.759	133.392	141.655	118.433	132.447	135.88	132.628	126.685	133.409	119.026	150.617	126.317	127.086	126.846	137.818	150.662	127.431	143.763	135.848	147.534	140.214
SD=10	Sim18	145.423	131.784	155.358	139.209	147.861	151.348	141.307	138.906	144.588	139.449	144.341	127.299	156.398	146.32	133.395	144.668	127.592	133.267	145.025	136.884	138.676	141.673	120.621	140.219
SD=10	Sim19	144.034	139.322	131.725	125.431	116.832	143.961	128.842	122.969	135.038	149.972	144.225	146.132	131.06	145.196	146.52	159.22	113.893	134.375	123.602	134.647	151.07	154.413	140.369	130.998
SD=10	Sim20	135.483	124.871	149.045	123.014	137.354	129.607	134.456	134.249	126.712	134.886	129.141	145.137	132.112	139.979	136.148	125.85	120.161	141.772	135.55	134.095	121.755	136.989	121.545	128.369
SD=10	Sim21	133.153	134.13	131.679	129.904	124.297	139.194	127.771	121.142	115.938	136.65	133.669	149.838	128.006	130.76	137.964	127.329	127.171	122.285	140.412	132.088	124.516	148.716	127.116	126.344
SD=10	Sim22	126.539	143.966	129.064	147.951	147.636	143.338	145.387	137.565	131.742	134.822	149.406	155.802	139.375	136.854	130.994	137.707	143.993	146.517	127.106	137.465	151.889	139.694	141.829	131.379
SD=10	Sim23	131.943	130.788	130.699	148.857	114.473	131.698	148.945	129.203	142.394	141.567	122.254	136.919	133.806	134.28	130.773	137.087	151.416	126.339	146.38	150.334	145.042	148.867	147.096	153.736
SD=10	Sim24	141.614	124.229	148.859	122.939	151.336	138.407	133.726	145.87	150.148	143.822	130.879	138.848	153.246	160.758	136.122	133.303	139.361	133.942	131.686	150.212	136.496	121.989	130.384	131.83
SD=10	Sim25	133.031	125.428	136.978	116.864	136.725	135.122	128.254	124.926	130.514	119.859	141.179	135.414	148.781	118.658	128.798	137.849	133.126	111.198	127.552	127.491	145.793	135.766	125.965	124.6
SD=10	Sim26	134.371	129.762	112.065	113.014	146.223	122.512	145.843	152.873	118.805	136.948	134.717	125.216	145.231	122.358	153.912	132.068	137.199	152.073	143.126	146.139	122.308	126.302	142.07	136.462
SD=10	Sim27	132.011	135.89	142.675	135.848	133.595	133.01	131.784	131.696	118.169	128.042	137.814	129.442	123.263	119.873	115.577	109.182	126.103	106.298	118.63	135.835	111.696	118.413	132.826	136.26
SD=10	Sim28	138.124	154.411	131.087	149.946	142.218	140.14	128.599	136.295	140.428	136.438	125.892	134.715	146.755	151.696	147.071	155.308	136.242	134.79	136.578	142.074	133.845	133.229	113.063	156.491
SD=10	Sim29	130.209	124.455	170.121	146.578	142.836	132.295	141.538	146.583	144.028	118.373	132.633	133.326	132.429	133.11	131.723	125.648	132.903	139.938	133.39	139.01	163	146.524	131.939	133.95
SD=10	Sim30	135.159	133.667	127.465	144.064	114.515	140.223	127.136	126.328	111.07	118.113	116.829	141.366	144.055	138.486	135.062	106.109	115.91	133.818	115.46	126.567	154.04	141.312	156.892	115.404
SD=10	Sim31	129.322	129.685	122.906	139.725	128.13	144.496	145.24	125.934	159.282	127.996	157.738	149.018	120.718	130.93	133.767	145.129	130.336	152.773	131.169	132.167	121.66	139.565	144.426	137.883
SD=10	Sim32	146.535	136.294	129.874	125.117	135.18	132.419	124.229	124.812	129.314	113.004	126.845	135.197	141.574	135.781	136.371	125.327	125.755	122.885	136.927	141.659	134.31	111.626	129.961	120.937
SD=10	Sim33	150.017	146.257	134.375	125.074	136.681	143.502	137.929	136.366	142.028	137.292	142.941	136.432	131.473	136.672	145.473	150.193	133.653	135.408	142.758	141.428	128.353	145.19	142.511	146.965
SD=10	Sim34	133.618	131.003	138.896	139.789	133.048	147.418	108.345	137.144	130.14	115.56	134.237	129.202	138.95	139.243	145.236	146.723	136.301	141.404	125.572	146.511	138.44	125.744	127.78	140.666
SD=10	Sim35	141.011	123.85	130.695	138.551	152.562	121.655	144.97	150.703	139.572	134.193	133.947	129.299	152.2	139.011	134.304	138.993	129.745	123.91	130.471	117.978	129.858	142.73	134.765	136.269
SD=10	Sim36	139.947	134.83	151.503	122.429	123.967	144.591	117.926	140.276	135.637	147.396	130.472	127.931	134.882	126.9	134.951	148.659	140.353	146.562	155.1	147.888	134.586	136.514	137.599	144.789
SD=10	Sim37	133.14	129.665	134.34	150.535	116.748	138.511	151.381	146.074	125.568	140.424	127.807	119.919	138.03	132.346	123.446	115.84	149.257	148.442	123.922	124.931	141.266	132.65	134.56	115.343
SD=10	Sim38	129.149	132.123	159.054	131.14	127.007	145.066	128.929	126.645	128.495	152.057	130.771	144.972	132.904	122.06	121.3	129.307	127.935	146.28	123.507	136.683	132.015	139.916	132.698	120.931
SD=10	Sim39	122.97	134.934	133.49	130.43	137.722	147.637	131.398	130.666	148.073	139.153	122.19	128.791	111.262	116.052	110.727	127.408	135.024	126.818	137.402	122.907	117.993	132.422	127.371	152.931
SD=10	Sim40	133.636	140.097	140.082	132.152	146.496	137.861	130.789	121.95	130.239	115.899	134.18	142.274	135.86	134.211	142.815	133.471	140.863	126.744	137.524	121.177	138.897	126.75	140.626	148.335
SD=10	Sim41	129.983	118.476	142.543	130.343	130.23	141.166	137.323	133.527	137.105	130.726	138.699	118.836	156.894	138.343	129.685	129.552	145.718	149.923	138.213	125.679	139.684	130.628	149.755	145.066
SD=10	Sim42	148.305	130.674	136.56	128.789	129.239	153.317	128.96	128.203	135.727	138.488	139.833	133.969	129.492	132.898	136.405	132.652	149.47	121.822	126.916	129.81	141.535	146.228	128.242	136.481
SD=10	Sim43	123.94	119.005	137.553	129.979	132.274	129.841	140.871	118.756	130.188	140.75	129.529	133.79	126.367	142.173	145.599	145.729	134.467	158.191	138.766	149.89	136.203	145.124	130.223	124.131
SD=10	Sim44	137.85	130.729	139.93	135.031	124.286	130.189	136.581	137.008	132.759	124.352	133.904	123.562	134.86	137.713	133.668	136.366	133.508	140.899	130.507	143.541	131.509	126.025	142.039	139.603
SD=10	Sim45	135.003	123.309	140.541	130.26	134.488	146.487	134.364	122.077	140.042	145.129	148.575	122.661	116.267	149.02	120.164	145.922	139.985	134.689	146.53	131.068	164.104	136.964	126.421	137.01
SD=10	Sim46	141.29	144.582	126.008	142.126	132.312	131.054	118.927	141.871	124.99	141.342	143.225	129.59	135.86	121.893	125.424	143.297	145.093	136.101	143.963	152.008	143.608	132.416	134.112	156.424
SD=10	Sim47	141.553	121.897	117.649	131.566	145.542	143.522	139.234	155.931	127.246	117.819	121.097	150.246	117.082	129.117	128.536	149.372	126.354	130.194	118.197	128.843	159.402	134.504	125.775	135.439
SD=10	Sim48	129.665	128.426	135.402	130.929	122.419	143.156	116.915	143.221	120.913	131.623	125.677	123.113	129.647	138.16	155.208	121.546	132.328	126.63	118.175	139.476	131.92	138.516	134.166	120.647
SD=10	Sim49	118.19	126.913	143.108	137.172	141.891	143.721	119.565	142.04	132.902	147.971	122.709	142.654	134.062	118.794	146.441	139.992	138.586	126.879	137.192	139.374	129.64	154.21	145.201	143.819
SD=10	Sim50	125.148	137.167	129.934	139.633	145.279	137.904	142.771	140.202	125.136	136.309	155.698	143.833	130.14	138.126	144.05	134.051	138.516	151.572	121.226	143.238	132.535	136.378	143.094	138.67
SD=10	Sim51	131.56	124.877	121.781	150.898	123.976	136.159	134.461	125.691	136.368	158.259	119.939	126.365	128.377	141.007	125.119	149.597	136.811	134.268	145.632	105.009	139.989	128.422	134.462	130.121
SD=10	Sim52	134.594	149.379	149.435	144.9	135.583	148.182	148.187	120.744	141.719	143.621	119.577	132.458	140.627	139.236	129.568	132.137	136.536	126.259	153.14	125.82	136.403	131.893	150.745	149.102
SD=10	Sim53	118.108	138.575	114.611	128.927	123.829	140.907	118.162	143.699	124.585	127.162	132.692	139.197	128.102	136.36	148.772	127.818	131.387	140.748	134.156	131.023	132.153	136.397	130.292	137.144
SD=10	Sim54	130.803	135.515	145.331	136.424	144.343	128.985	142.441	140.141	149.734	139.807	127.911	125.945	138.328	145.382	133.215	139.843	163.008	153.084	136.63	145.486	131.186	125.913	137.849	161.599
SD=10	Sim55	138.444	117.075	141.958	118.074	129.613	139.237	127.487	137.851	143.769	131.592	125.587	111.269	110.496	143.191	130.725	148.906	129.962	126.879	139.485	143.27	133.732	124.764	139.545	131.609
SD=10	Sim56	137.6	126.361	128.183	123.179	129.161	144.5	149.194	127.631	120.696	123.335	127.179	135.796	131.328	140.196	128.952	141.818	126.319	137.826	133.546	131.87	134.265	112.064	127.407	132.5
SD=10	Sim57	147.554	121.404	133.802	122.029	132.209	125.927	144.666	127.907	118.477	126.205	128.931	136.849	130.829	115.208	125.219	122.441	131.266	114.348	145.47	128.68	132.344	131.783	130.763	139.606
SD=10	Sim58	151.092	138.826	125.694	161.838	133.429	154.424	154.464	138.453	139.372	131.092	127.333	140.967	151.661	138.901	137.059	142.881	135.602	154.973	132.598	143.318	135.413	135.113	139.075	131.449
SD=10	Sim59	131.521	147.314	145.334	143.337	131.07	122.948	135.554	141.528	124.615	137.494	147.009	134.901	130.695	149.006	148.497	146.8	130.94	142.561	146.305	131.386	136.899	131.777	130.548	144.585
SD=10	Sim60	132.975	134.748	97.0784	135.506	126.927	141.551	119.26	115.548	149.44	142.827	130.432	132.422	135.528	118.466	124.317	113.421	127.09	150.006	144.34	115.96	152.225	124.238	122.845	125.291
SD=10	Sim61	135.327	140.576	147.029	147.868	139.566	131.081	133.979	138.788	137.93	131.366	121.775	142.852	134.072	134.128	137.443	139.274	146.017	124.766	137.064	132.513	121.012	144.368	142.199	121.953
SD=10	Sim62	137.323	155.279	145.615	135.543	147.705	134.265	124.228	158.236	118.614	140.347	141.746	154.558	134.529	152.237	127.975	130.666	119.607	143.137	128.872	120.047	124.259	121.034	145.663	127.229
SD=10	Sim63	140.974	126.024	133.223	137.598	126.963	125.508	153.326	139.437	124.115	132.656	132.575	125.024	122.667	128.675	128.704	126.325	132.233	128.696	139.167	126.598	130.8	126.749	130.072	131.375
SD=10	Sim64	132.138	141.801	136.264	128.583	126.273	129.563	134.616	121.334	144.074	131.756	119.668	131.008	130.617	135.097	134.836	116.511	143.94	127.258	120.589	125.686	137.973	142.26	128.371	130.153
SD=10	Sim65	136.939	142.018	143.272	158.557	136.271	104.849	155.331	124.079	145.305	139.422	135.243	126.538	142.308	112.594	133.467	147.217	129.109	136.143	131.344	145.327	124.191	127.683	143.227	134.493
SD=10	Sim66	129.814	139.534	136.486	120.716	139.945	130.322	124.737	128.319	134.069	134.806	121.854	139.476	153.841	135.569	123.734	127.101	138.983	164.805	141.635	155.903	137.876	120.801	130.99	135.146
SD=10	Sim67	136.036	141.872	125.306	127.272	128.305	138.94	137.894	124.389	123.606	134.182	134.362	120.781	119.891	136.338	137.728	141.496	127.047	132.475	131.936	135.262	129.321	123.485	131.482	133.192
SD=10	Sim68	130.986	144.619	122.725	122.104	126.859	133.664	153.675	145.535	144.705	129.865	114.125	130.855	142.102	137.04	136.12	137.136	137.901	153.723	115.848	127.838	140.317	128.539	160.617	131.243
SD=10	Sim69	140.988	135.869	140.095	142.435	136.908	112.707	124.564	121.902	139.618	98.0257	138.059	147.641	139.493	132.182	106.727	118.52	129.865	148.239	136.973	127.139	150.165	137.153	132.344	125.992
SD=10	Sim70	126.476	134.886	121.802	133.3	133.127	114.112	137.234	126.861	120.52	133.547	132.43	128.583	129.119	135.652	114.769	106.298	123.087	135.407	140.958	130.594	136.402	148.758	95.8527	128.434
SD=10	Sim71	148.443	147.246	138.996	145.082	125.131	131.505	112.849	131.548	139.487	135.881	147.879	128.946	137.847	142.448	126.984	155.952	115.086	139.892	145.756	138.258	126.798	142.785	139.622	128.387
SD=10	Sim72	136.105	125.198	141.918	147.315	146.924	128.438	114.16	129.095	133.636	136.957	141.9	140.719	150.082	133.44	132.054	142.26	149.435	142.388	123.877	127.252	119.055	128.678	134.602	123.678
SD=10	Sim73	133.93	146.051	137.34	146.455	129.025	145.067	144.296	151.889	151.929	135.229	138.069	149.62	143.861	150.274	127.73	160.543	127.778	138.658	121.728	136.762	122.532	120.162	124.177	136.218
SD=10	Sim74	131.664	141.278	136.205	145.8	133.344	133.007	130.969	144.032	140.081	136.287	149.273	125.665	143.393	130.39	137.787	118.103	135.453	156.922	146.435	120.049	148.053	131.173	149.375	140.07
SD=10	Sim75	164.233	131.107	138.613	124.989	123.67	141.397	143.696	136.978	136.713	142.481	137.192	129.084	144.647	154.816	135.064	124.056	130.752	146.765	154.447	131.48	136.961	140.663	130.68	150.825
SD=10	Sim76	125.717	135.899	126.75	133.597	139.024	110.649	117.177	131.196	131.949	120.871	121.148	132.767	127.675	121.515	125.888	118.976	136.76	118.08	133.65	109.109	129.031	134.804	126.584	144.06
SD=10	Sim77	132.919	130.079	134.02	151.69	128.032	133.554	135.918	120.892	125.65	145.539	133.142	121.335	133.548	135.159	135.859	130.106	143.388	140.939	132.866	148.918	135.06	129.307	127.772	137.023
SD=10	Sim78	118.201	136.219	154.974	135.304	146.026	138.385	137.149	147.949	115.522	136.523	113.239	147.545	147.725	137.756	129.416	128.819	147.695	136.617	130.492	145.11	142.91	147.779	131.808	140.932
SD=10	Sim79	134.483	130.449	140.182	136.742	139.542	141.832	142.806	140.584	144.395	139.77	122.52	145.479	134.854	130.409	143.299	131.642	131.439	124.95	135.132	126.583	122.433	128.822	141.209	137.398
SD=10	Sim80	146.343	120.941	148.506	151.092	127.113	135.438	124.467	130.366	132.502	121.783	126.841	140.019	133.85	119.107	140.55	146.432	122.507	115.506	130.357	136.67	132.086	144.086	143.512	145.868
SD=10	Sim81	145.796	144.624	135.399	137.203	132.089	133.824	127.19	123.927	142.636	148.529	138.312	125.001	136.89	130.99	128.047	126.972	128.016	161.027	147.062	141.814	145.698	147.223	125.922	149.499
SD=10	Sim82	146.16	126.691	130.816	137.961	142.159	139.979	124.354	143.659	143.306	138.378	141.872	132.719	140.991	132.433	154.306	140.119	146.202	147.849	121.949	132.19	137.983	136.452	133.03	126.342
SD=10	Sim83	123.277	143.196	136.379	132.68	143.531	125.341	142.27	136.399	115.041	124.077	138.661	123.364	143.859	149.209	116.984	156.217	122.587	119.4	118.583	124.839	124.542	133.383	130.74	155.456
SD=10	Sim84	130.267	131.627	140.885	116.79	123.405	131.427	126.14	123.97	124.686	131.914	118.285	146.701	150.228	154.563	139.258	136.432	119.3	154.398	128.624	130.51	138.116	142.725	116.232	119.813
SD=10	Sim85	108.462	127.696	147.838	139.019	137.78	130.045	134.433	124.344	146.023	129.156	128.476	112.799	137.823	127.983	133.895	128.186	127.992	150.958	130.417	131.442	144.171	120.541	131.366	138.792
SD=10	Sim86	136.937	152.829	126.503	139.475	151.414	134.534	153.782	132.125	137.26	114.854	126.47	155.753	127.788	135.835	127.827	143.874	144.786	142.963	124.74	127.973	139.882	152.183	148.756	134.092
SD=10	Sim87	136.884	151.818	128.592	138.534	139.587	147.97	128.989	141.602	130.556	134.168	141.516	145.688	145.248	127.291	150.73	140.165	138.317	150.033	145.758	131.217	143.575	132.256	138.238	135.3
SD=10	Sim88	132.874	135.947	148.19	131.546	131.474	130.026	143.357	123.468	142.396	140.44	140.286	140.832	140.734	141.626	146.795	149.475	131.668	140.068	137.047	139.905	152.319	143.853	148.267	135.143
SD=10	Sim89	122.995	128.052	129.042	148.358	121.116	129.65	126.774	139.243	134.403	137.7	124.561	159.671	118.366	125.561	130.81	128.13	135.014	125.479	130.546	134.115	140.088	131.221	129.889	132.762
SD=10	Sim90	117.008	135.022	125.806	112.095	133.931	129.867	149.459	133.307	145.396	152.448	143.114	113.44	132.1	147.067	137.921	119.48	135.442	159.879	156.595	135.538	136.855	149.21	135.366	152.817
SD=10	Sim91	120.463	127.011	153.186	123.129	134.926	143.711	132.642	140.143	140.706	144.343	122.806	139.442	143.82	128.48	121.303	128.738	144.84	129.161	141.311	126.598	143.415	159.169	139.641	129.009
SD=10	Sim92	125.221	127.357	129.268	131.743	126.594	139.221	132.992	142.828	152.791	135.097	129.577	127.386	137.668	129.624	139.612	137.352	139.571	130.852	131.976	94.6743	134.679	123.662	117.271	140.086
SD=10	Sim93	141.863	117.504	133.388	130.207	142.051	120.545	142.367	141.51	136.475	140.967	132.6	123.375	124.673	120.748	130.896	118.404	145.309	125.921	119.811	141.983	129.685	149.46	145.163	115.655
SD=10	Sim94	151.902	121.004	133.563	142.923	134.905	122.481	143.041	147.271	137.972	137.595	148.571	133.655	154.689	139.15	147.118	123.516	137.209	129.225	129.068	158.479	129.258	130.651	139.676	134.848
SD=10	Sim95	134.452	154.742	144.482	128.523	125.052	146.576	124.028	162.733	132.879	135.991	142.636	157.586	134.972	116.76	138.774	126.812	134.661	130.102	132.842	131.24	147.243	146.804	146.489	136.433
SD=10	Sim96	137.521	147.779	117.392	135.393	140.071	130.21	133.336	132.043	129.868	124.659	152.084	141.684	133.153	132.99	150.941	129.471	134.361	147.794	134.774	130.404	131.454	149.369	123.047	131.517
SD=10	Sim97	150.337	144.097	131.703	137.084	129.99	124.724	142.475	124.211	132.786	135.473	126.803	128.182	137.723	117.995	138.62	118.476	131.125	132.661	129.343	110.697	132.093	131.604	128.501	111.332
SD=10	Sim98	137.615	136.606	135.912	125.473	140.082	143.838	140.302	150.844	144.046	137.209	129.077	124.581	124.595	151.83	148.142	127.254	149.365	139.859	144.924	135.606	124.769	138.077	117.894	137.515
SD=10	Sim99	156.91	124.574	128.958	123.9	143.98	125.419	125.89	125.354	136.092	120.283	126.486	128.071	139.456	141.677	134.63	147.842	127.456	137.17	129.838	138.972	130.55	118.027	117.686	125.875
Result	ID	SBP01	SBP02	SBP03	SBP04	SBP05	SBP06	SBP07	SBP08	SBP09	SBP10	SBP11	SBP12	SBP13	SBP14	SBP15	SBP16	SBP17	SBP18	SBP19	SBP20	SBP21	SBP22	SBP23	SBP24
SD=15	Sim00	96.0246	148.705	133.168	152.262	121.881	135.236	143.367	144.65	113.837	138.875	158.679	133.023	138.454	100.608	146.086	143.188	130.131	125.308	111.489	134.753	133.676	127.225	101.893	126.547
SD=15	Sim01	113.721	144.876	118.692	148.979	111.46	140.561	146.102	135.239	135.762	126.133	135.974	141.874	147.392	157.359	138.242	110.315	124.354	133.078	133.938	146.231	91.7438	151.385	148.769	118.038
SD=15	Sim02	140.859	127.449	126.501	137.212	150.043	135.278	134.645	146.488	125.1	135.325	143.138	153.662	136.504	147.432	118.865	134.479	139.817	131.96	123.202	129.372	143.829	137.284	118.062	111.729
SD=15	Sim03	122.159	125.672	142.151	124.16	148.873	151.902	134.576	136.114	145.693	126.516	141.138	158.17	154.991	114.751	141.738	148.903	141.595	163.363	160.019	130.292	143.939	116.584	153.269	125.801
SD=15	Sim04	120.88	120.646	126.984	109.991	128.198	117.162	141.345	124.077	107.706	112.285	126.101	131.969	130.037	129.528	144.151	135.875	143.775	126.766	135.713	139.513	152.074	141.02	131.122	119.516
SD=15	Sim05	142.105	113.497	131.312	130.602	136.634	112.327	111.019	130.831	147.066	146.146	126.836	133.7	141.234	150.868	146.572	147.778	111.584	159.287	125.126	136.386	137.391	112.75	157.442	133.582
SD=15	Sim06	135.316	136.644	161.282	140.603	131.127	136.15	140.212	142.286	141.404	149.192	141.054	168.621	120.788	144.338	143.466	155.754	136.244	95.4053	132.943	171.794	125.579	142.242	122.538	136.411
SD=15	Sim07	142.203	124.493	126.072	137.784	117.962	120.583	135.497	131.025	138.699	122.759	140.752	150.639	122.156	153.39	134.8	159.919	139.476	154.063	132.598	105.492	122.966	100.808	122.593	136.898
SD=15	Sim08	136.957	119.574	127.692	138.907	152.99	99.5788	104.374	134.905	129.181	144.456	131.113	125.766	167.238	142.724	125.52	145.116	108.335	123.48	159.185	110.118	144.664	109.697	139.819	122.744
SD=15	Sim09	116.59	141.033	157.557	116.296	166.927	143.178	119.079	124.227	137.419	129.189	122.424	110.822	151.501	141.524	154.147	146.497	135.38	150.036	146.404	148.26	104.957	147.362	116.799	149.882
SD=15	Sim10	134.285	118.46	137.469	144.433	138.202	123.309	116.679	116.651	129.825	143.248	136.523	160.256	155.612	130.343	118.777	147.132	131.683	145.014	147.243	127.723	129.728	155.241	112.624	159.111
SD=15	Sim11	137.029	153.877	133.118	150.647	136.409	136.823	134.082	121.788	143.647	118.055	143.389	152.279	150.047	153.307	143.419	114.495	147.294	138.723	135.983	139.06	110.935	127.656	141.797	134.237
SD=15	Sim12	149.45	138.076	125.62	118.563	172.743	143.056	143.38	132.002	129.507	169.467	112.469	136.729	123.249	132.606	141.28	133.838	157.809	143.898	136.767	131.536	144.132	135.336	101.223	141.036
SD=15	Sim13	117.306	141.566	125.998	156.775	103.491	164.647	120.733	130.675	134.937	124.647	135.197	123.397	156.133	125.498	127.082	120.412	147.634	123.403	132.853	117.493	137.262	146.71	147.746	133.074
SD=15	Sim14	160.719	143.487	143.081	116.089	149.05	117.634	166.325	143.925	143.727	146.189	162.19	137.239	143.718	141.982	147.929	127.234	119.695	162.252	126.209	130.853	153.752	147.97	153.884	128.892
SD=15	Sim15	135.443	169.138	105.561	123.781	136.489	135.311	140.873	144.921	132.747	107.421	98.0591	180.04	119.098	119.334	147.647	147.599	139.842	135.697	135.738	107.069	122.561	142.483	106.417	113.531
SD=15	Sim16	129.676	141.115	144.821	149.558	147.645	153.029	134.094	165.807	116.711	147.836	132.482	120.396	145.933	134.945	117.404	132.586	153.493	120.39	99.1729	104.779	141.017	114.959	135.486	132.642
SD=15	Sim17	165.497	134.036	135.4	127.05	124.892	116.414	122.278	135.879	109.661	116.423	169.104	137.113	141.822	115.704	146.654	121.772	119.344	147.524	117.742	141.238	135.146	130.793	121.468	140.959
SD=15	Sim18	119.418	132.966	156.715	150.297	137.265	146.662	151.144	117.463	110.973	134.634	151.93	129.013	134.844	119.045	133.792	156.28	125.387	124.692	131.663	121.255	133.646	135.568	116.213	135.784
SD=15	Sim19	131.873	114.899	116.807	159.629	145.421	110.87	127.612	117.193	144.12	164.805	137.327	140.863	130.61	147.942	118.605	149.039	123.083	139.354	110.051	131.653	127.806	128.827	150.142	139.553
SD=15	Sim20	137.716	137.003	105.154	119.1	107.518	126.767	116.624	131.332	135.485	140.95	140.325	126.277	130.143	118.193	142.818	129.944	129.973	144.526	144.691	117.691	128.319	136.85	122.182	121.385
SD=15	Sim21	117.562	113.682	127.882	139.789	144.404	131.719	146.403	152.27	128.451	121.789	129.258	149.285	135.933	154.549	130.825	137.273	101.119	118.326	103.233	137.86	144.311	132.729	125.91	132.603
SD=15	Sim22	122.209	139.221	171.503	145.284	141.21	133.515	148.842	176.584	152.04	124.073	162.414	124.014	140.123	160.57	114.455	141.016	143.031	137.601	128.119	143.047	172.533	137.903	171.17	157.368
SD=15	Sim23	139.701	132.482	138.664	136.422	143.814	144.274	161.192	136.61	148.935	128.329	132.531	131.372	128.024	126.376	137.72	142.567	131.403	126.307	127.511	132.183	141.176	145.47	160.217	150.196
SD=15	Sim24	136.404	149.532	128.981	129.618	155.858	132.325	110.876	148.305	128.232	128.39	141.98	119.777	124.472	134.633	124.965	115.442	133.62	149.645	142.847	109.969	143.64	164.278	155.075	137.73
SD=15	Sim25	118.041	136.344	132.051	135.963	108.456	130.935	133.52	108.955	150.622	124.733	140.459	137.079	128.777	137.125	117.08	121.61	152.334	140.497	135.648	129.822	117.977	135.705	125.856	145.14
SD=15	Sim26	159.6	137.525	111.127	153.5	131.241	118.235	127.951	137.115	145.935	121.397	129.791	151.56	129.779	118.356	152.207	135.73	150.229	142.235	145.217	157.527	149.027	112.712	146.786	141.3
SD=15	Sim27	129.053	159.271	105.843	137.268	146.951	141.677	135.863	143.282	134.003	127.614	112.056	133.226	127.175	127.419	117.936	136.133	78.7912	152.267	129.695	111.488	118.561	128.166	169.976	127.777
SD=15	Sim28	160.193	124.528	137.362	119.899	131.226	154.347	104.017	127.998	136.011	124.178	121.709	125.524	140.731	153.787	139.08	122.987	142.858	141.409	130.097	121.192	141.134	159.428	142.041	116.891
SD=15	Sim29	145.824	159.054	124.432	182.18	133.671	151.049	118.983	137.409	124.568	128.982	139.158	118.451	132.384	140.652	142.905	158.059	132.2	145.825	115.098	118.447	133.917	132.623	126.058	127.48
SD=15	Sim30	137.491	125.823	119.545	126.896	141.656	110.422	114.868	129.277	131.539	130.662	139.979	124.778	148.433	141.529	132.35	129.691	121.833	120.422	134.613	154.777	126.247	147.297	149.633	115.089
SD=15	Sim31	135.243	136.185	155.714	130.988	119.142	147.6	143.291	104.158	147.854	132.08	153.758	138.027	140.318	128.051	162.301	129.246	114.08	155.457	157.415	127.23	132.643	138.679	137.771	144.747
SD=15	Sim32	147.044	151.286	113.91	127.828	134.75	128.348	147.27	134.279	132.472	125.475	121.105	111.34	122.269	131.852	116.579	122.108	133.046	127.445	155.551	127.598	114.893	108.661	150.777	134.728
SD=15	Sim33	141.259	143.885	142.963	137.595	144.311	136.449	148.925	116.239	139.358	157.803	166.723	136.741	175.718	151.479	118.091	143.318	113.358	151.989	135.014	124.107	147.134	138.21	152.582	138.74
SD=15	Sim34	142.739	130.425	138.629	125.809	125.802	136.037	132.152	141.23	119.597	134.073	134.18	139.923	144.286	115.734	156.509	129.543	141.006	111.82	180.924	146.733	133.346	162.33	124.725	111.304
SD=15	Sim35	135.667	143.677	126.331	134.311	144.349	120.681	131.651	136.005	114.769	131.905	140.303	135.572	131.013	143.088	138.099	127.643	137.957	155.093	150.413	123.472	138.543	114.821	139.068	129.979
SD=15	Sim36	156.505	149.023	129.128	129.12	134.67	113.793	143.449	123.525	158.966	138.539	158.632	120.767	138.512	123.294	136.526	113.94	155.31	130.635	131.995	154	148.678	133.309	135.868	128.232
SD=15	Sim37	141.439	124.532	127.979	127.994	127.012	112.506	121.291	137.334	126.664	140.062	148.355	146.889	152.326	118.613	127.678	131.448	135.754	143.692	129.784	125.1	139.366	102.036	130.588	137.421
SD=15	Sim38	137.024	131.996	125.842	147.021	146.156	137.906	152.493	161.705	122.915	150.954	152.031	119.707	123.562	137.536	123.43	114.827	132.609	132.6	157.62	126.61	130.353	150.301	142.945	129.311
SD=15	Sim39	147.227	137.575	138.363	138.876	137.479	132.573	138.59	120.167	131.194	129.441	117.412	126.899	136.622	148.551	136.116	140.215	155.454	111.801	130.024	116.727	117.8	120.145	146.921	130.573
SD=15	Sim40	134.384	115.107	144.804	153.958	129.885	151.287	156.587	134.088	136.697	132.001	145.845	162.79	125.627	159.526	153.684	139.221	143.677	102.693	156.649	132.706	125.336	122.487	124.559	155.329
SD=15	Sim41	142.343	141.46	128.802	161.3	130.155	151.2	128.386	149.054	154.747	146.658	162.819	145.779	144.877	116.628	138.351	118.61	123.4	153.66	142.259	130.398	136.746	129.829	150.034	126.452
SD=15	Sim42	155.864	164.932	121.454	146.711	134.8	144.441	150.333	127.892	135.204	158.685	112.08	152.767	115.35	172.103	117.319	119.805	127.554	140.069	133.066	137.236	148.306	137.016	137.045	131.961
SD=15	Sim43	109.109	130.143	125.197	109.296	133.315	144.94	125.271	154.766	121.491	122.053	119.252	145.624	138.741	121.155	123.162	134.53	145.637	132.737	127.954	90.5698	150.171	142.605	141.016	141.478
SD=15	Sim44	132.528	146.729	116.545	134.378	129.915	145.913	123.84	123.454	172.83	146.308	135.729	133.321	156.643	142.986	135.316	138.351	143.631	126.598	155.777	113.521	136.018	122.534	139.393	110.753
SD=15	Sim45	148.815	136.82	148.154	121.617	133.401	122.27	138.583	129.561	129.341	145.642	134.187	140.196	123.103	122.316	127.198	133.882	139.137	131.718	166.231	121.332	122.014	131.423	147.778	175.268
SD=15	Sim46	134.116	134.918	149.704	145.277	127.288	135.626	130.033	153.653	156.319	152.658	150.706	121.884	156.209	122.603	127.642	120.715	138.178	127.679	137.774	133.69	156.083	141.428	110.032	131.422
SD=15	Sim47	109.752	118.892	131.838	134.477	111.644	110.3	129.603	156.66	134.141	128.866	118.738	154.191	130.771	132.736	139.385	124.347	126.909	122.382	136.621	135.43	145.23	123.293	145.151	152.687
SD=15	Sim48	113.874	129.382	138.573	144.193	116.971	109.567	134.718	108.904	139.945	123.51	127.555	108.912	149.349	124.774	123.533	126.33	124.54	140.733	134.177	150.943	136.906	104.667	125.936	142.514
SD=15	Sim49	124.154	124.084	154.055	139.149	112.408	119.479	112.632	143.269	148.105	160.998	128.637	158.596	139.5	132.455	134.255	137.926	134.594	116.002	133.908	131.59	131.231	159.16	126.595	124.623
SD=15	Sim50	128.55	148.647	141.461	138.626	144.124	148.807	118.308	132.222	127.168	157.74	154.908	132.486	136.238	139.521	129.721	150.044	129.868	155.027	140.423	132.144	142.584	115.585	168.286	121.093
SD=15	Sim51	108.847	110.627	148.014	139.738	124.985	123.623	127.981	115.617	130.07	151.637	109.94	120.599	125.844	136.8	121.149	145.114	144.726	121.006	130.099	152.987	101.953	141.515	121.584	132.534
SD=15	Sim52	100.682	143.678	127.959	116.268	144.821	115.775	126.013	161.882	128.843	141.875	153.178	112.413	131.762	141.162	134.669	134.979	109.649	142.557	151.697	141.451	128.335	129.503	146.914	149.618
SD=15	Sim53	118.784	103.63	151.183	163.09	139.845	146.843	134.191	136.125	139.202	136.472	129.667	137.35	150.326	129.646	151.014	126.954	122.433	141.096	137.387	149.317	154.281	135.597	132.312	144.841
SD=15	Sim54	120.615	159.245	129.162	140.41	132.467	156.152	132.176	131.07	123.029	161.499	143.415	155.121	136.845	142.333	119.953	145.54	138.295	142.99	146.462	125.294	141.573	149.024	144.714	128.749
SD=15	Sim55	125.648	125.83	120.15	109.214	132.204	124.71	111.267	127.424	146.733	122.632	99.0158	145.303	154.646	151.051	152.033	119.589	113.26	155.843	123.331	109.487	155.242	96.6983	142.425	151.163
SD=15	Sim56	127.198	140.378	149.5	138.925	108.764	137.502	141.414	112.186	115.875	108.087	147.714	116.746	108.867	118.188	117.626	120.526	105.734	134.158	125.242	132.416	143.485	158.925	87.2043	109.2
SD=15	Sim57	133.618	148.247	117.406	138.225	123.187	156.631	136.308	131.567	154.821	131.688	124.442	142.209	132.629	156.68	152.979	121.205	161.245	119.741	133.183	136.808	145.734	162.941	144.082	170.078
SD=15	Sim58	146.24	179.345	115.902	135.245	172.063	137.685	154.334	122.349	147.281	165.993	143.829	118.116	143.284	121.217	159.587	167.728	133.565	149.25	120.055	130.837	128.238	150.236	107.274	135.711
SD=15	Sim59	116.986	124.045	140.678	116.614	171.7	137.75	148.427	132.488	122.648	174.036	120.234	135.871	155.193	134.715	143.53	141.955	132.03	122.36	161.916	136.044	125.06	156.031	119.162	138.539
SD=15	Sim60	119.056	124.271	122.597	148.963	127.914	149.609	108.994	115.789	121.029	136.194	85.7994	113.094	137.689	131.282	115.404	132.616	104.517	125.279	129.575	136.855	116.435	127.694	128.946	131.253
SD=15	Sim61	120.937	106.207	128.793	126.154	123.599	138.811	117.295	139.765	102.065	115.564	113.178	148.995	128.983	118.256	148.913	128.798	138.939	151.705	129.789	132.944	128.322	129.149	125.733	130.398
SD=15	Sim62	175.184	115.545	125.757	121.24	145.07	127.266	134.172	104.852	126.534	139.357	158.945	139.993	139.184	152.483	146.625	122.53	128.679	129.134	121.056	139.539	150.156	157.71	128.49	164.853
SD=15	Sim63	140.412	133.179	113.648	122.966	138.464	128.088	133.739	152.39	112.165	152.324	137.406	106.546	105.857	129.756	132.646	133.472	142.693	140.872	139.417	142.662	124.23	113.052	121.811	134.151
SD=15	Sim64	146.225	114.018	134.523	125.946	133.248	124.101	143.091	113.853	129.416	147.919	134.333	135.059	147.981	136.053	122.931	120.473	117.216	149.171	144.486	139.276	107.31	137.307	98.8539	135.675
SD=15	Sim65	148.102	132.455	130.057	114.094	131.002	145.429	114.494	138.339	131.727	140.544	116.311	111.512	136.507	139.088	133.602	114.391	135.666	136.059	141.952	138.564	128.764	123.138	144.297	85.8899
SD=15	Sim66	104.22	105.214	132.687	136.041	121.022	136.555	117.633	112.621	144.562	121.746	138.014	163.222	124.163	138.621	157.528	143.644	125.862	144.383	147.84	141.712	132.621	124.277	140.054	142.481
SD=15	Sim67	130.662	144.968	132.265	124.916	139.1	142.797	143.167	149.821	108.168	116.756	131.767	114.203	116.883	116.427	118.977	146.125	132.737	129.698	137.23	126.557	112.038	134.802	121.18	142.187
SD=15	Sim68	138.902	108.321	166.636	115.019	144.658	125.386	125.533	103.374	124.997	122.032	155.386	114.654	121.821	153.075	139.179	133.983	129.052	106.772	146.961	149.292	142.458	128.32	131.418	135.38
SD=15	Sim69	141.443	142.412	167.645	148.378	127.517	139.096	140.556	142.582	123.844	138.705	117.319	157.937	126.347	117.605	137.063	134.442	126.379	137.301	148.1	156.604	105.826	145.516	134.377	140.547
SD=15	Sim70	125.281	140.598	158.703	146.878	154.912	145.094	150.122	135.598	138.292	132.583	143.142	140.788	97.2348	112.246	151.908	138.473	136.305	118.144	142.538	122.044	146.696	118.409	137.74	140.701
SD=15	Sim71	152.27	150.728	127.815	127.799	125.968	148.86	136.73	122.194	135.953	157.687	135.661	146.626	133.076	171.834	136.181	143.275	164.5	128.902	139.929	124.01	151.554	149.664	145.359	113.295
SD=15	Sim72	145.652	129.914	151.219	156.4	128.274	146.946	123.622	138.013	117.035	125.79	132.607	159.113	182.111	135.258	126.515	126.753	137.491	144.364	163.119	149.159	164.266	161.09	141.285	123.114
SD=15	Sim73	140.304	131.205	146.667	136.853	181.478	140.326	127.204	120.887	137.894	141.005	111.795	105.406	125.616	163.608	110.08	125.592	144.024	122.958	135.296	109.546	133.403	153.713	143.008	129.64
SD=15	Sim74	118.422	133.664	166.782	128.342	134.618	141.258	140.688	116.076	137.408	167.449	137.65	159.579	132.307	120.353	115.8	169.795	139.697	130.393	122.658	153.554	124.969	180.054	146.903	116.723
SD=15	Sim75	127.037	147.823	148.496	125.096	125.26	151.473	145.938	155.106	135.126	158.038	147.062	131.419	158.494	136.546	135.711	120.508	136.464	123.87	165.028	128.557	130.2	169.497	140.155	156.275
SD=15	Sim76	103.011	143.964	103.618	135.612	129.812	130.655	148.039	99.9718	147.069	125.37	118.095	133.128	126.441	152.434	146.183	125.963	115.399	115.903	116.669	130.742	145.091	129.839	94.8903	137.958
SD=15	Sim77	138.774	134.323	121.978	147.348	118.19	142.929	148.047	127.002	154.808	118.684	137.007	110.766	158.243	122.275	133.33	149.878	141.029	144.587	133.445	122.377	119.764	118.807	144.664	152.059
SD=15	Sim78	131.892	145.159	138.007	132.465	144.859	155.987	138.86	137.122	135.174	133.194	132.491	123.826	158.79	139.67	139.693	112.572	133.322	136.378	115.646	137.145	134.533	178.17	144.9	139.463
SD=15	Sim79	152.83	149.239	150.209	151.5	155.328	151.105	98.0216	141.649	161.124	131.325	151.181	148.559	106.122	127.915	136.65	119.974	135.161	106.821	124.467	121.821	126.66	137.602	122.331	131.804
SD=15	Sim80	109.257	131.093	130.642	130.117	136.684	162.243	131.461	120.72	120.945	126.136	132.616	145.114	107.018	146.963	123.261	160.353	127.314	128.745	132.446	127.27	123.594	131.063	135.731	147.078
SD=15	Sim81	106.647	123.967	138.676	140.027	132.395	144.726	156.436	152.076	146.731	165.091	136.782	131.626	141.65	127.015	116.37	156.988	127.506	139.644	152.414	121.471	121.063	136.621	130.855	169.141
SD=15	Sim82	143.372	157.433	129.014	125.908	124.145	140.801	148.264	112.317	116.871	154.226	146.593	144.832	133.932	142.728	134.543	142.8	147.379	122.149	132.036	144.67	117.086	146.388	140.702	109.566
SD=15	Sim83	137.233	108.591	158.85	98.5743	134.705	133.815	133.185	118.424	141.37	131.636	128.845	101.191	130.176	149.103	143.235	132.848	117.716	117.147	108.965	132.209	161.086	153.056	124.459	142.237
SD=15	Sim84	113.446	135.396	145.442	134.255	155.655	137.482	104.509	135.905	121.8	172.741	126.947	141.457	125.921	133.212	110.76	133.697	120.032	128.54	129.94	149.304	147.894	127.02	143.734	127.043
SD=15	Sim85	119.437	138.482	129.579	140.11	138.748	125.472	112.83	127.705	112.885	123.112	135.072	123.857	126.171	124.697	125.025	134.907	117.374	119.632	145.685	135.745	145.753	162.382	154.713	122.259
SD=15	Sim86	150.621	103.17	133.256	166.68	157.471	113.565	138.261	127.716	157.72	111.148	120.185	138.478	158.297	144.491	117.931	120.048	150.326	152.257	152.132	156.822	128.382	156.669	150.676	148.862
SD=15	Sim87	142.131	138.822	153.553	127.028	138.75	132.326	154.637	134.906	143.129	117.46	142.77	108.073	127.278	157.544	121.949	136.879	153.554	132.069	143.63	150.68	119.341	161.894	133.505	120.573
SD=15	Sim88	141.381	153.682	163.193	121.018	118.163	147.303	97.0776	135.027	132.86	123.646	141.346	130.133	165.274	132.319	137.753	148.444	140.166	155.841	126.172	151.878	138.013	137.198	135.78	139.381
SD=15	Sim89	112.817	125.841	114.642	156.37	113.969	129.981	122.82	138.377	155.219	122.561	128.003	149.011	159.919	124.323	131.003	138.038	129.934	114.786	131.867	134.397	157.238	114.862	146.26	127.938
SD=15	Sim90	160.348	144.301	151.522	131.263	150.195	142.111	127.434	128.434	161.453	135.718	165.084	158.928	144.205	138.153	146.752	140.463	156.734	129.715	157.06	135.94	157.25	130.383	149.537	120.203
SD=15	Sim91	132.28	157.417	161.517	132.239	136.223	148.614	141.072	127.521	117.331	133.026	149.871	128.563	132.071	135.46	137.84	134.718	135.049	120.689	132.451	149.041	126.81	164.749	126.605	128.91
SD=15	Sim92	123.098	140.736	142.555	116.627	111.558	131.151	158.166	126.19	123.351	119.606	106.725	140.101	120.409	121.408	143.081	127.206	136.646	123.321	116.985	125.415	145.753	146.416	128.05	128.322
SD=15	Sim93	138.694	143.206	138.829	130.72	139.254	123.564	155.314	135.408	143.145	133.964	132.062	137.325	126.262	131.49	128.968	165.298	134.903	141.736	111.711	149.601	119.27	144.125	129.879	128.485
SD=15	Sim94	127.533	125.085	143.625	150.729	154.694	141.59	149.036	126.338	143.669	160.186	136.955	153.134	128.68	131.308	142.931	152.385	121.128	127.552	134.356	142.603	137.333	155.783	155.994	129.927
SD=15	Sim95	149.482	110.094	137.445	160.733	98.6113	162.128	125.391	122.978	104.053	121.92	151.317	125.852	146.348	163.335	123.78	156.043	102.783	110.237	114.271	116.73	132.148	146.945	156.265	129.81
SD=15	Sim96	134.432	139.868	134.351	133.24	135.064	159.529	113.717	131.874	130.915	146.473	140.767	124.174	117.556	132.707	125.863	153.231	133.215	113.947	128.185	138.87	156.872	130.963	135.576	142.509
SD=15	Sim97	121.516	144.788	145.583	120.253	130.452	129.742	101.956	141.155	114.098	138.126	126.857	131.518	123.311	141.175	140.512	122.336	140.757	164.572	116.217	110.788	131.303	150.691	136.802	151.716
SD=15	Sim98	138.372	126.57	120.534	116.567	149.161	134.418	134.302	155.405	166.785	123.335	171.107	136.368	168.837	101.515	123.054	127.298	167.024	139.981	141.449	137.297	141.842	147.355	157.18	183.072
SD=15	Sim99	128.693	115.193	134.533	144.101	125.743	121.09	123.201	141.967	150.14	140.241	145.85	126.968	143.391	145.033	129.737	121.721	140.179	111.492	135.195	117.196	124.675	119.997	146.192	138.916
Result	ID	SBP01	SBP02	SBP03	SBP04	SBP05	SBP06	SBP07	SBP08	SBP09	SBP10	SBP11	SBP12	SBP13	SBP14	SBP15	SBP16	SBP17	SBP18	SBP19	SBP20	SBP21	SBP22	SBP23	SBP24
SD=20	Sim00	144.66	103.664	149.79	128.45	145.561	143.746	117.135	145.341	150.883	127.441	126.043	172.595	108.236	139.57	131.828	130.605	116.26	141.598	154.901	127.317	111.509	155.829	173.005	151.716
SD=20	Sim01	141.404	113.369	122.129	98.4109	133.037	165.155	151.493	111.923	135.878	161.318	126.522	145.515	128.901	120.618	151.652	138.165	137.007	130.487	128.18	101.319	123.484	150.622	163.035	118.823
SD=20	Sim02	124.92	156.85	125.914	111.34	122.92	130.571	135.689	110.365	140.869	149.583	133.536	139.019	142.246	129.226	98.311	156.22	130.639	124.216	121.252	130.26	141.879	95.5665	117.581	123.337
SD=20	Sim03	139.429	156.921	146.429	152.136	130.733	142.705	108.892	148.7	161.35	145.217	153.663	98.7662	141.552	158.697	128.246	149.472	136.089	149.064	166.602	139.044	137.76	115.819	166.326	157.208
SD=20	Sim04	145.644	109.944	137.669	120.105	108.239	108.555	119.01	116.246	122.783	127.071	95.6111	107.928	150.28	140.517	118.597	131.02	145.655	112.156	156.722	107.329	130.895	111.828	104.464	147.698
SD=20	Sim05	139.319	118.777	121.201	147.729	145.867	141.166	162.756	151.152	131.71	123.803	119.816	107.86	132.15	110.337	116.198	125.583	134.452	158.3	143.509	143.105	117.914	142.672	155.849	120.353
SD=20	Sim06	125.741	185.473	105.791	139.66	163.243	163.285	108.037	149.817	154.763	126.009	151.031	145.583	122.453	126.991	127.761	112.57	137.185	118.372	163.645	185.144	146.43	150.359	143.038	113.118
SD=20	Sim07	133.123	122.543	156.131	111.203	135.171	135.163	146.918	125.46	152.765	149.875	114.561	106.505	124.688	143.379	143.76	103.833	125.333	137.205	142.877	138.572	120.217	121.49	143.794	136.089
SD=20	Sim08	144.555	141.876	114.237	146.583	128.247	134.54	136.838	135.729	135.714	120.701	134.135	168.105	144.487	128.824	150.571	152.677	183.966	122.438	148.325	136.321	87.3096	127.609	158.224	120.858
SD=20	Sim09	139.632	151.983	129.474	118.287	118.267	146.317	157.929	134.305	138.981	124.556	145.951	147.566	107.791	105.724	134.789	135.595	120.616	102.848	100.047	135.316	122.357	144.357	137.412	134.708
SD=20	Sim10	135.245	159.465	148.038	148.987	120.492	98.6555	143.652	159.29	177.988	145.956	126.177	98.4693	147.402	150.736	123.058	133.436	117.652	158.865	172.544	123.216	119.674	133.001	153.334	147.001
SD=20	Sim11	169.984	165.718	124.799	146.329	156.618	121.322	125.231	146.943	133.913	154.378	150.486	119.118	146.202	124.641	155.471	109.39	126.67	142.064	124.123	141.073	144.613	107.752	119.108	164.885
SD=20	Sim12	122.417	115.789	131.551	150.405	142.232	160.376	129.285	137.294	108.666	97.0027	164.371	146.885	155.048	186.022	152.4	137.566	152.992	145.594	149.315	133.52	145.217	129.165	133.455	147.372
SD=20	Sim13	113.165	126.67	133.303	124.2	124.684	148.446	151.154	135.803	135.546	98.8294	118.172	136.112	109.961	126.573	125.595	122.324	161.598	140.305	136.529	138.708	154.102	112.332	116.945	132.78
SD=20	Sim14	147.997	105.524	152.515	137.477	146.517	133.816	143.409	121.866	159.408	124.514	155.411	123.482	98.948	148.518	155.927	152.207	154.559	153.129	137.686	145.816	164.449	140.389	124.474	127.085
SD=20	Sim15	166.838	147.097	166.676	119.95	147.018	120.315	108.66	127.126	137.575	129.925	139.015	149.406	151.965	134.1	101.14	148.825	136.415	108.896	134.412	136.766	105.841	142.446	139.68	136.251
SD=20	Sim16	130.723	97.621	153.511	161.787	115.123	140.658	81.8334	172.507	128.531	144.192	141.925	123.489	140.948	133.319	130.372	94.6793	110.554	120.653	145.532	139.74	119.624	155.952	132.231	116.828
SD=20	Sim17	119.896	115.774	153.472	132.713	129.301	97.5925	138.202	101.379	134.724	129.598	102.545	171.216	116.783	132.67	126.98	141.634	86.6801	143.662	144.639	138.293	128.94	153.23	119.976	97.0089
SD=20	Sim18	140.565	158.495	164.488	142.625	134.787	141.878	129.397	165.102	133.484	115.849	145.324	137.6	145.092	115.736	130.961	158.626	135.215	141.661	119.581	128.855	114.295	114.307	151.66	117.843
SD=20	Sim19	97.8196	158.631	93.559	131.474	157.919	124.352	106.897	138.1	135.891	126.74	103.481	155.384	173.715	130.815	126.89	148.78	133.34	88.0662	149.871	148.511	172.114	128.814	109.263	148.884
SD=20	Sim20	116.599	154.739	140.39	98.6905	138.075	99.4118	136.121	131.01	106.891	98.6517	124.015	115.48	154.823	146.903	146.633	152.752	96.9053	131.035	119.498	127.895	113.755	86.1818	111.663	118.118
SD=20	Sim21	176.735	133.564	147.985	127.701	119.778	108.051	126.459	139.455	121.536	113.374	122.204	167.502	104.386	130.882	163.701	106.503	128.538	159.297	139.2	89.2443	153.278	163.642	136.52	116.73
SD=20	Sim22	152.353	113.824	134.635	139.294	123.596	141.081	135.254	158.589	133.636	105.367	120.941	123.488	117.361	111.662	97.0142	158.74	137.584	148.461	126.814	109.821	159.357	138.585	133.649	154.884
SD=20	Sim23	135.448	149.787	171.232	145.395	134.286	146.886	124.36	119.975	157.165	121.477	131.682	106.139	122.324	118.47	118.098	156.35	123.426	121.318	164.084	126.63	160.084	150.996	153.856	159.058
SD=20	Sim24	148.705	177.469	142.411	136.808	163.389	155.532	117.266	123.518	123.531	146.949	132.401	156.593	109.964	120.37	152.999	156.993	114.492	108.281	121.821	171.287	135.08	113	128.277	136.321
SD=20	Sim25	134.903	113.318	111.038	159.677	156.176	156.057	137.211	129.941	131.888	149.335	124.016	89.0238	101.635	121.526	162.298	112.114	117.593	101.303	113.515	132.799	147.135	128.117	156.339	153.733
SD=20	Sim26	105.227	134.639	158.427	175.857	128.157	147.988	142.442	123.485	111.651	135.163	162.134	146.025	171.682	129.927	121.444	138.149	168.164	103.105	126.784	129.088	88.2342	145.676	162.387	166.85
SD=20	Sim27	106.019	110.347	94.7081	122.543	114.943	148.687	125.596	146.701	109.291	131.81	172.168	127.516	124.24	147.448	109.173	128.712	133.44	92.6904	113.551	118.891	179.55	134.946	121.565	119.148
SD=20	Sim28	166.03	135.314	146.197	138.759	175.461	147.007	113.541	121.901	96.4577	131.98	128.936	121.866	108.291	159.972	140.316	168.719	121.299	124.847	155.416	123.049	114.509	178.465	113.776	138.26
SD=20	Sim29	156.267	86.017	115.977	148.739	106.243	139.099	120.72	116.542	117.969	133.496	142.068	140.548	139.812	136.424	170.494	134.142	123.663	66.0676	125.493	138.752	130.42	114.514	154.238	134.17
SD=20	Sim30	134.205	161.269	148.981	116.586	124.125	121.203	137.048	132.482	131.3	110.168	127.113	117.3	110.66	158.1	158.148	136.814	118.602	125.23	124.502	96.5378	125.408	133.978	106.053	103.234
SD=20	Sim31	159.795	151.944	141.302	153.384	120.012	183.584	141.164	127.784	137.738	103.881	131.456	101.339	128.805	143.798	128.722	128.133	110.503	112.402	158.151	137.657	146.584	110.918	137.026	145.975
SD=20	Sim32	149.509	117.744	147.456	83.503	114.319	142.074	190.486	139.537	133.398	144.56	135.08	100.442	134.966	132.538	139.29	143.866	118.411	134.822	83.5945	127.852	119.46	144.232	142.471	113.062
SD=20	Sim33	113.417	154.496	132.394	103.268	108.424	121.545	127.565	147.869	152.657	131.756	111.414	108.626	128.755	149.015	163.953	132.96	135.116	123.34	129.927	108.495	147.752	128.101	142.002	168.843
SD=20	Sim34	124.351	118.479	118.966	147.057	129.595	119.638	125.693	116.079	112.73	123.565	101.971	112.044	127.374	137.883	156.98	131.651	169.079	136.506	145.379	122.523	136.129	130.023	77.4896	132.602
SD=20	Sim35	120.229	153.844	139.551	135.91	154.569	92.283	125.28	152.131	134.174	97.3503	161.585	98.738	137.84	166.155	134.534	117.817	141.555	110.241	118.859	109.811	128.616	122.939	139.327	108.013
SD=20	Sim36	154.315	148.47	134.562	162.934	148.068	167.255	133.253	137.559	125.467	137.381	104.486	146.683	151.037	135.543	118.817	115.15	136.829	132.787	145.117	117.567	133.391	153.303	145.111	134.87
SD=20	Sim37	113.433	95.8706	172.944	143.127	175.121	119.208	119.319	147.109	121.993	123.751	142.801	117.532	157.146	110.511	123.012	154.586	130.744	147.485	135.366	100.898	100.352	137.727	123.192	180.803
SD=20	Sim38	154.837	151.162	114.697	143.274	124.772	133.185	106.18	106.799	121.875	128.244	135.597	133.191	113.384	154.795	111.055	133.447	134.677	137.507	148.67	124.604	128.937	152.192	149.516	127.799
SD=20	Sim39	134.168	112.224	123.897	141.433	130.159	135.499	132.956	117.64	115.678	95.3912	153.403	158.19	141.843	130.561	138.445	132.46	168.406	120.972	134.551	135.535	126.503	124.588	148.428	160.607
SD=20	Sim40	148.532	162.866	139.272	123.25	120.672	115.943	166.677	133.161	144.984	145.381	152.736	157.534	147.688	140.815	166.603	142.466	160.709	152.01	132.071	131.364	97.1267	139.043	188.724	149.798
SD=20	Sim41	141.299	113.364	123.646	126.739	115.701	130.707	186.9	181.914	113.261	132.277	139.478	134.22	137.83	151.709	122.554	159.719	117.68	147.765	125.264	152.812	155.494	174.395	157.081	139.003
SD=20	Sim42	121.641	133.385	145.203	119.111	143.752	100.605	113.246	138.52	123.633	137.025	180.416	105.868	135.082	137.068	153.745	134.325	143.97	137.803	132.724	120.685	129.327	128.425	78.9185	112.98
SD=20	Sim43	147.801	136.053	129.505	136.665	124.48	124.678	137.615	139.444	149.376	145.297	128.789	167.837	132.195	123.275	116.388	136.687	137.593	129.385	112.459	118.075	149.348	136.765	131.421	173.46
SD=20	Sim44	152.417	110.101	131.979	130.206	111.78	138.48	146.404	166.289	140.351	126.649	148.448	144.669	98.446	117.455	155.135	106.566	133.523	102.389	145.038	152.492	175.645	145.173	109.217	130.739
SD=20	Sim45	118.422	164.101	138.717	132.442	142.661	130.167	146.617	150.544	128.368	109.083	134.586	122.503	151.735	151.881	113.765	116.947	174.812	122.466	182.777	113.287	126.974	189.397	133.914	120.565
SD=20	Sim46	155.96	144.661	132.275	157.284	144.757	169.537	159.923	119.548	157.852	164.949	143.564	153.754	144.134	121.512	170.651	130.443	142.107	121.394	140.111	143.183	145.693	150.282	127.439	131.343
SD=20	Sim47	125.809	162.602	127.579	111.766	144.585	130.037	160.859	120.715	115.292	163.898	125.35	187.535	150.129	123.973	152.338	92.0863	128.362	132.619	97.6656	137.122	112.06	135.752	119.176	109.789
SD=20	Sim48	157.029	150.117	142.215	140.011	162.991	132.177	130.504	138.03	128.748	138.697	124.827	139.108	148.833	161.692	134.952	137.979	138.752	132.877	157.012	143.068	138.299	137.192	142.31	176.808
SD=20	Sim49	136.363	116.458	101.392	132.69	159.92	102.864	133.766	149.746	117.847	119.413	140.065	142.199	92.3707	126.072	133.801	152.086	123.218	90.1898	145.858	110.936	144.899	126.876	137.121	135.272
SD=20	Sim50	108.466	129.646	130.829	169.44	144.365	147.395	142.556	151.271	152.105	140.89	146.943	164.941	165.93	126.808	141.526	142.285	147.421	155.369	120.841	175.32	176.982	124.78	136.663	167.967
SD=20	Sim51	154.703	141.966	120.814	103.421	112.917	117.861	118.398	129.483	138.496	113.705	158.859	133.268	125.753	142.124	163.516	133.47	150.905	137.195	129.36	122.288	115.756	119.584	123.24	156.11
SD=20	Sim52	144.944	139.367	122.431	108.081	96.2544	140.435	136.038	159.161	148.954	125.163	142.619	104.98	160.244	124.758	136.699	154.193	138.612	157.069	151.041	119.454	114.255	150.539	139.365	146.054
SD=20	Sim53	153.864	143.091	130.975	125.974	137.014	118.149	144.933	147.045	124.133	168.592	152.166	108.641	160.294	164.366	131.62	118.244	134.473	130.687	109.011	174.29	136.966	125.04	128.929	163.699
SD=20	Sim54	102.262	145.4	134.106	172.372	114.314	129.074	159.056	153.351	102.045	141.597	123.407	155.354	137.215	141.857	132.451	181.745	130.815	154.971	140.557	155.819	120.722	140.44	105.42	125.319
SD=20	Sim55	101.966	130.881	151.3	142.017	115.649	137.89	111.954	138.21	142.014	122.828	159.175	119.639	115.304	136.746	83.0314	118.903	141.593	114.044	158.628	137.333	103.048	121.275	158.01	121.901
SD=20	Sim56	150.022	156.203	123.775	127.939	105.712	120.462	128.549	147.904	143.771	121.677	157.457	119.597	154.294	165.19	145.095	112.27	144.677	125.562	152.747	131.12	129.393	105.994	85.997	160.261
SD=20	Sim57	148.59	128.662	176.147	150.893	129.918	94.1305	149.273	175.869	113.61	144.942	108.747	105.449	149.924	138.237	132.367	140.624	173.63	127.611	122.652	158.924	106.361	90.894	144.747	143.721
SD=20	Sim58	132.296	135.152	127.786	154.827	123.027	122.342	140.733	149.429	129.071	132.061	130.641	147.042	124.129	105.824	162.751	151.661	164.341	150.472	133.886	129.311	157.877	130.416	108.663	103.301
SD=20	Sim59	161.96	165.177	127.694	129.718	110.66	146.727	118.635	119.48	166.223	142.694	126.442	149.04	119.598	103.053	105.628	144.733	145.73	131.776	147.976	145.799	161.362	120.724	149.149	149.143
SD=20	Sim60	141.883	118.546	101.696	139.427	122.58	146.43	123.647	141.004	133.192	118.003	173.453	136.696	108.83	123.973	117.983	140.306	183.871	111.782	113.3	154.827	114.908	142.069	151.873	124.227
SD=20	Sim61	124.934	88.566	130.852	150.735	114.026	184.98	141.139	104.23	137.794	126.31	103.006	121.237	143.096	104.376	124.418	133.219	127.212	144.635	130.557	123.494	97.7772	102.475	109.783	138.428
SD=20	Sim62	150.167	124.497	153.989	156.868	152.619	174.704	122.071	150.151	147.202	116.336	124.659	151.933	149.536	136.319	112.979	172.606	139.284	128.657	145.291	142.023	127.522	152.278	127.398	114.165
SD=20	Sim63	109.202	133.738	132.115	112.18	142.499	141.881	107.52	112.034	135.171	133.25	131.363	115.391	136.282	132.548	137.893	127.326	83.3651	144.249	136.518	152.753	142.795	145	163.901	160.107
SD=20	Sim64	112.742	147.338	123.437	105.942	139.318	127.309	139.677	163.226	119.296	139.376	141.487	146.185	148.398	124.206	159.101	117.454	123.732	146.215	139.972	153.141	122.327	136.696	127.465	130.885
SD=20	Sim65	104.759	135.89	156.119	134.481	122.451	148.238	112.154	117.83	182.901	115.926	137.14	99.154	106.803	139.422	135.544	118.388	146.175	132.808	157.424	131.103	141.338	128.157	125.236	132.384
SD=20	Sim66	175.72	165.735	132.388	107.246	160.692	152.153	110.557	122.879	155.919	140.705	160.742	103.53	182.322	160.027	120.446	122.654	134.744	142.371	157.779	122.643	131.839	121.109	119.474	176.686
SD=20	Sim67	141.572	150.731	144.079	152.028	141.688	174.431	136.73	151.765	134.163	149.579	88.3711	140.502	115.895	125.091	157.689	143.38	126.309	129.042	112.996	130.114	162.485	123.627	121.882	128.053
SD=20	Sim68	123.951	158.459	131.426	138.447	140.455	144.349	141.668	164.944	159.102	163.986	118.931	122.746	168.824	109.532	119.268	141.734	137.131	132.248	144.714	131.575	132.255	131.503	152.691	159.315
SD=20	Sim69	155.624	143.455	124.684	127.211	140.67	130.122	129.785	158.872	131.347	98.8895	140.735	135.122	101.703	137.507	119.567	128.867	134.393	113.46	153.125	100.87	121.515	148.668	141.253	121.37
SD=20	Sim70	139.151	124.434	89.1479	131.572	151.421	88.7295	116.933	137.178	116.112	144.453	127.01	140.504	114.552	169.117	115.028	125.872	166.408	129.092	120.436	126.427	167.237	135.701	117.157	140.23
SD=20	Sim71	155.202	119.483	149.428	136.26	142.42	145.613	140.11	150.921	190.288	131.709	154.832	139.194	152.886	132.617	128.695	126.615	136.719	112.991	122.825	119.562	90.7391	134.649	138.087	118.823
SD=20	Sim72	105.333	125.973	133.617	157.162	146.625	137.731	159.703	143.374	149.192	172.202	166.071	150.271	120.458	152.476	121.618	148.933	160.455	142.328	155.316	156.26	115.193	141.807	158.756	178.391
SD=20	Sim73	152.073	159.585	157.393	158.821	156.963	148.027	156.53	129.522	167.369	129.466	116.261	158.998	163.339	163.456	145.559	158.545	132.799	111.078	140.291	127.091	114.156	144.61	123.311	110.689
SD=20	Sim74	105.282	142.386	130.429	105.863	178.259	131.069	166.447	114.043	138.738	124.088	97.5173	118.389	163.52	156.689	119.925	158.278	126.622	165.945	119.304	108.642	168.751	130.816	134.886	144.325
SD=20	Sim75	143.008	130.734	153.903	119.643	110.416	113.271	133.436	165.322	115.308	109.943	149.922	126.698	112.296	118.641	166.648	128.983	163.221	159.085	147.942	128.693	138.418	103.98	107.116	139.881
SD=20	Sim76	129.581	144.709	148.582	149.367	104.595	117.172	111.666	130.472	104.761	129.019	115.516	159.522	150.572	121.048	119.881	152.346	145.402	146.75	135.578	115.278	91.0598	129.632	118.219	125.358
SD=20	Sim77	125.79	121.958	132.425	111.747	148.009	141.513	125.402	108.893	156.993	110.523	162.825	152.663	148.203	99.8752	133.786	125.121	148.455	142.699	114.398	102.769	142.972	133.988	110.475	163.895
SD=20	Sim78	135.464	176.243	139.551	138.828	175.602	161.647	133.489	135.894	139.261	123.171	134.246	111.205	89.6875	192.965	145.939	154.904	143.924	168.2	102.995	157.203	145.082	133.64	118.735	131.482
SD=20	Sim79	121.873	112.943	127.104	130.653	150.109	121.501	125.933	126.908	99.9838	130.782	158.977	161.551	144.974	178.316	128.112	135.675	145.173	137.246	126.306	131.148	153.569	157.766	160.539	146.008
SD=20	Sim80	125.421	166.818	139.375	125.749	141.874	132.843	122.032	184.692	171.248	74.6277	115.87	133.572	144.656	108.51	137.659	132.909	107.984	108.308	98.7322	143.415	121.385	147.581	148.604	158.003
SD=20	Sim81	118.821	129.302	132.719	151.607	129.783	147.963	148.842	128.56	155.108	131.416	131.548	120.983	136.795	136.078	159.618	169.105	152.646	92.9405	147.683	106.255	142.193	134.227	126.668	136.937
SD=20	Sim82	109.202	139.902	140.01	144.736	160.198	131.815	155.393	147.484	133.148	128.742	128.025	123.062	131.047	120.226	118.786	132.442	151.64	133.125	129.365	142.833	161.348	193.105	169.135	118.427
SD=20	Sim83	161.8	136.879	165.145	110.834	108.887	126.173	123.876	166.678	121.855	149.054	133.264	154.823	149.151	104.554	141.31	129.546	166.118	114.598	130.807	161.261	144.456	154.944	150.698	130.105
SD=20	Sim84	150.477	153.197	76.9399	120.068	119.009	111.925	151.663	146.491	100.251	79.8533	133.474	154.525	160.805	122.322	134.374	91.3022	170.167	143.591	112.589	128.607	111.359	89.8532	110.868	125.314
SD=20	Sim85	124.926	104.047	134.234	123.888	120.879	122.734	142.393	91.3768	156.634	130.454	124.687	138.822	106.757	119.785	154.395	108.951	100.736	162.21	176.954	133.706	129.581	95.8774	134.18	154.508
SD=20	Sim86	141.486	102.62	151.323	177.253	124.835	142.757	143.575	140.689	162.058	136.697	142.62	120.195	111.975	172.209	110.836	93.014	165.234	111.26	124.331	147.795	79.5925	137.731	166.714	153.454
SD=20	Sim87	126.012	135.293	108.786	129.686	113.412	97.1315	146.654	133.206	118.014	107.368	158.461	146.939	135.855	148.885	150.796	131.641	159.257	175.359	136.906	149.413	129.758	123.443	141.117	122.967
SD=20	Sim88	153.586	166.487	147.743	136.741	133.626	129.458	132.939	97.7901	129.762	147.776	169.844	152.422	119.404	138.819	111.6	127.699	142.695	108.771	117.053	123.579	145.712	154.696	118.161	170.932
SD=20	Sim89	162.728	147.19	134.622	127.224	122.993	121.881	116.689	130.822	174.796	122.653	123.597	120.142	154.21	117.533	130.165	106.103	119.978	119.147	152.409	111.235	114.919	109.124	138.294	127.941
SD=20	Sim90	122.338	110.832	133.587	112.836	147.317	142.612	128.817	127.154	126.517	105.874	168.354	121.758	134.11	155.061	151.34	113.938	134.605	143.583	137.233	140.593	107.048	155.07	103.106	142.636
SD=20	Sim91	120.03	134.567	136.955	155.877	151.735	152.412	154.613	140.722	134.972	148.873	97.8545	133.437	95.0762	119.085	115.74	116.494	143.15	156.218	121.729	204.096	63.2476	116.839	152.278	148.346
SD=20	Sim92	152.736	137.754	108.707	130.937	164.335	140.788	126.296	178.801	96.4892	109.268	120.184	136.868	166.577	100.771	83.1364	114.428	133.844	166.878	134.04	109.348	129.616	133.179	138.3	117.355
SD=20	Sim93	132.679	153.221	104.594	86.6578	147.93	134.631	131.301	162.794	130.764	143.034	166.883	117.205	161.491	167.694	146.599	122.293	101.1	142.161	121.585	151.132	129.053	141.493	139.521	135.838
SD=20	Sim94	149.688	122.697	147.015	141.321	138.603	131.64	153.367	152.018	86.7668	163.792	167.876	115.947	116.672	133.643	144.08	119.206	106.338	139.446	134.978	106.929	175.665	151.836	139.006	155.603
SD=20	Sim95	150.274	142.593	107.49	135.066	125.728	127.76	131.765	116.85	183.053	128.569	155.082	130.847	148.486	133.071	133.772	126.11	115.002	136.115	118.957	126.308	119.792	150.28	124.578	131.715
SD=20	Sim96	166.208	133.08	107.818	118.333	123.279	126.904	147.763	87.0562	113.744	110.167	138.931	120.693	98.7078	126.184	120.07	146.392	112.959	93.8634	119.675	125.577	159.285	93.3174	135.82	140.328
SD=20	Sim97	101.769	107.597	137.211	138.045	108.518	134.751	142.295	119.161	118.061	111.453	118.716	130.821	155.009	134.054	125.583	119.478	146.974	112.591	146.865	128.258	106.744	126.109	125.359	156.772
SD=20	Sim98	114.609	161.593	127.526	129.993	158.701	134.515	149.978	163.164	133.138	132.008	146.332	144.784	127.657	144.939	127.428	97.2925	121.611	161.586	133.381	140.831	144.174	164.524	146.447	117.591
SD=20	Sim99	150.75	149.617	117.611	154.257	118.284	140.021	129.47	110.254	101.808	126.768	128.282	116.058	101.828	106.422	130.01	135.853	154.377	120.293	166.4	124.618	128.81	168.548	128.419	124.456

## Sheet: SBP_K20
Result	ID	SBP01	SBP02	SBP03	SBP04	SBP05	SBP06	SBP07	SBP08	SBP09	SBP10	SBP11	SBP12	SBP13	SBP14	SBP15	SBP16	SBP17	SBP18	SBP19	SBP20
SD=5	Sim00	133.839	135.216	143.549	131.026	142.556	132.256	132.314	134.326	134.383	143.173	139.119	141.382	134.982	128.641	126.54	117.046	136.357	130.157	134.988	135.741
SD=5	Sim01	130.347	124.397	129.832	128.337	127.369	140.501	137.09	126.404	135.105	138.22	131.696	125.503	134.783	130.636	129.145	124.589	136.342	136.936	129.385	125.848
SD=5	Sim02	140.217	136.417	126.346	136.655	127.528	138.157	138.302	132.877	128.57	128.495	133.922	124.57	143.899	129.925	134.205	140.6	138.268	130.865	134.404	135.962
SD=5	Sim03	135.32	130.538	136.287	135.701	140.381	136.78	131.53	131.929	139.158	128.751	142.047	137.729	139.353	135.129	132.988	136.822	141.415	134.654	132.017	137.111
SD=5	Sim04	132.876	128.419	130.498	120.315	139.339	132.133	132.238	124.088	129.193	133.13	130.594	131.659	127.77	131.574	137.087	131.043	138.176	131.528	131.964	135.045
SD=5	Sim05	140.842	136.455	136.921	140.231	142.925	129.585	138.044	135.819	129.807	146.331	131.824	137.815	135.343	138.827	136.931	132.289	132.431	141.143	138.965	134.22
SD=5	Sim06	137.275	141.027	136.99	135.646	132.287	144.424	135.366	131.191	137.381	139.178	138.909	140.273	135.232	151.362	141.322	144.145	142.787	147.232	131.962	137.379
SD=5	Sim07	139.088	129.497	139.551	126.251	131.861	128.063	128.394	127.897	127.656	133.457	134.99	140.185	131.557	136.522	139.918	137.973	138.939	129.806	137.879	136.612
SD=5	Sim08	136.758	136.787	136.623	133.793	136.675	136.763	141.677	139.588	144.799	133.74	135.19	141.039	137.183	135.805	135.039	126.472	137.616	125.966	131.074	131.221
SD=5	Sim09	132.275	135.61	130.617	130.189	124.844	144.317	133.739	132.287	126.172	132.787	123.327	131.319	139.081	119.275	133.661	132.999	126.795	135.558	129.932	136.888
SD=5	Sim10	143.368	130.939	138.952	135.572	131.982	129.062	125.852	143.606	138.519	127.49	135.13	143.216	128.209	135.094	136.24	141.279	144.264	136.975	134.639	141.477
SD=5	Sim11	125.063	132.976	133.274	130.08	134.657	142.638	134.493	138.779	130.978	140.446	128.078	140.237	127.938	138.515	133.947	138.557	141.193	137.668	137.631	140.703
SD=5	Sim12	132.288	130.012	135.972	128.19	131.908	135.947	133.525	129.534	134.827	138.326	136.912	128.42	139.141	122.116	137.868	133.058	137.33	138.4	135.364	123.045
SD=5	Sim13	129.241	133.779	136.864	134.257	137.072	143.236	146.768	133.812	134.52	141.494	140.94	134.884	131.032	130.201	139.856	137.112	128.058	127.721	131.596	135.661
SD=5	Sim14	140.387	145.922	127.015	131.82	133.929	135.276	137.195	145.625	139.08	137.914	143.162	136.899	135.675	145.495	144.031	136.722	146.32	145.552	139.599	144.961
SD=5	Sim15	126.3	127.712	127.837	125.698	127.722	139.286	133.226	130.019	129.688	126.31	138.12	130.485	131.422	132.284	133.103	129.455	138.625	129.463	132.188	136.322
SD=5	Sim16	134.321	139.984	140.967	136.166	142.86	133.201	136.723	137.766	144.198	134.971	126.152	132.378	133.907	137.489	131.051	127.049	132.415	130.529	134.771	131.493
SD=5	Sim17	128.895	128.184	132.379	128.338	133.419	128.089	131.906	127.342	134.204	134.044	126.991	124.165	131.106	120.461	129.133	137.37	124.334	124.889	134.528	142.388
SD=5	Sim18	146.5	142.292	132.283	147.756	128.176	130.811	144.128	139.745	146.256	134.918	138.817	134.961	132.736	137.979	138.576	144.89	133.591	138.89	133.65	134.753
SD=5	Sim19	140.684	135.397	133.601	120.938	136.454	129.872	139.095	135.261	139.975	136.984	132.379	129.022	129.772	134.854	139.513	134.694	130.146	133.569	139.388	129.176
SD=5	Sim20	140.309	136.372	138.094	125.919	131.363	126.581	123.634	137.713	124.411	139.395	133.035	133.798	130.794	125.331	130.226	135.412	134.958	134.071	134.148	133.814
SD=5	Sim21	135.055	138.622	121.629	128.701	132.885	128.853	119.366	132.426	131.519	131.934	138.881	134.963	132.743	136.802	138.104	139.206	129.376	130.201	131.257	133.216
SD=5	Sim22	135.869	138.541	139.21	144.055	147.553	148.258	142.457	133.504	140.911	146.166	137.313	140.725	139.44	137.297	136.387	149.096	143.185	138.297	136.886	133.428
SD=5	Sim23	139.045	142.573	136.341	141.97	137.705	141.752	138.018	140.003	143.592	131.053	136.164	128.009	144.015	140.684	147.718	139.1	145.543	138.567	143.249	144.509
SD=5	Sim24	139.069	147.326	147.88	145.172	128.679	135.608	142.438	137.357	142.723	138.801	131.561	136.029	139.751	136.22	142.351	125.563	133.862	130.769	129.158	130.73
SD=5	Sim25	132.944	134.529	140.742	135.193	129.482	134.087	133.747	137.058	132.949	129.004	138.951	134.836	129.189	131.4	135.251	128.302	132.567	137.188	125.15	127.121
SD=5	Sim26	138.753	131.383	126.601	139.265	135.715	132.842	135.635	129.705	140.921	141.559	132.565	144.292	130.388	139.844	136.75	140.964	136.471	135.27	144.595	134.224
SD=5	Sim27	130.558	125.911	131.323	132.937	133.219	120.063	137.567	138.46	139.029	135.999	138.298	131.318	119.157	135.126	132.425	131.151	126.955	141.849	129.981	131.125
SD=5	Sim28	139.809	129.49	142.178	139.523	146.505	141.731	136.83	129.585	142.124	136.707	142.29	135.776	142.182	123.767	142.93	134.551	136.591	137.6	141.573	135.397
SD=5	Sim29	141.977	138.616	133.651	133.831	144.392	141.029	138.79	145.032	139.936	136.552	134.205	131.728	130.608	139.371	138.184	144.174	134.224	138.663	134.523	149.44
SD=5	Sim30	127.377	135.194	121.927	139.462	125.455	124.742	128.871	132.84	127.252	130.698	129.483	137.941	122.41	135.287	127.396	142.16	129.756	140.069	131.38	127.104
SD=5	Sim31	131.191	139.034	135.164	136.141	130.225	138.991	135.846	135.59	140.162	145.231	128.778	131.717	146.689	130.078	134.801	138.951	132.043	137.86	136.202	134.584
SD=5	Sim32	137.786	126.354	129.948	127.126	124.782	130.428	128.21	132.351	123.009	121.762	126.709	125.328	123.935	131.433	131.832	130.382	129.63	124.537	125.943	131.933
SD=5	Sim33	141.228	142.781	133.117	134.871	135.968	138.871	141.19	128.89	141.346	143.696	131.995	138.255	132.656	131.853	146.587	141.446	135.66	139.212	134.495	150.22
SD=5	Sim34	136.801	134.693	138.43	138.043	134.469	132.787	131.435	129.523	134.701	134.85	133.898	138.181	132.912	132.055	133.941	134.134	132.845	129.499	135.504	131.586
SD=5	Sim35	126.609	133.733	135.193	140.095	134.06	134.47	129.298	128.355	127.091	136.346	139.967	135.124	133.389	137.712	134.306	131.053	128.137	130.011	131.732	137.017
SD=5	Sim36	136.969	126.351	140.801	141.763	140.884	132.941	129.576	137.097	141.282	147.037	133.281	139.581	135.235	148.454	146.724	141.91	131.771	138.296	136.801	132.337
SD=5	Sim37	132.069	138.811	125.897	134.808	132.627	122.645	131.509	136.186	133.476	138.83	122.14	136.814	126.994	135.87	141.828	124.814	124.019	140.877	133.085	127.066
SD=5	Sim38	143.282	133.665	136.706	134.049	135.468	139.186	135.755	132.154	131.025	134.702	135.476	139.122	141.025	140.633	137.645	134.351	138.036	135.498	138.893	131.611
SD=5	Sim39	130.687	132.948	138.109	132.065	131.202	141.211	120.696	141.451	125.686	130.545	129.095	132.503	132.318	130.469	146.588	130.725	135.89	123.41	127.021	141.615
SD=5	Sim40	128.569	136.81	139.996	140.305	135.367	134.091	140.075	132.025	134.021	132.434	131.412	138.896	147.453	140.764	138.151	127.533	138.318	139.751	131.041	134.66
SD=5	Sim41	140.867	133.75	144.872	136.178	134.293	133.911	136.546	133.657	132.228	142.343	133.727	143.185	136.278	141.792	140.679	145.554	135.847	143.89	146.989	145.458
SD=5	Sim42	132.705	141.762	125.869	125.901	132.866	129.895	136.859	130.172	131.889	136.385	128.335	135.712	135.153	135.435	140.594	140.918	134.294	135.214	132.974	134.304
SD=5	Sim43	144.881	131.756	138.958	136.033	131.391	128.784	134.006	139.268	124.552	131.352	139.889	132.199	134.308	137.529	139.859	128.178	147.983	139.202	135.009	134.468
SD=5	Sim44	145.314	134.305	138.068	136.818	131.112	141.694	136.258	134.275	132.808	138.801	135.704	134.394	132.982	125.969	130.937	140.517	139.086	130.032	143.128	133.617
SD=5	Sim45	136.557	142.574	148.402	141.527	142.782	140.231	145.769	143.915	139.88	135.799	137.438	135.822	137.368	134.085	143.126	141.565	137.968	143.444	148.776	126.521
SD=5	Sim46	141.841	138.774	130.721	141.829	141.861	134.27	145.893	145.723	137.988	136.778	135.871	131.13	151.16	136.988	133.998	140.447	134.209	139.133	133.518	145.662
SD=5	Sim47	128.73	128.091	137.007	129.778	130.999	131.82	135.547	125.339	125.285	140.175	129.095	129.528	130.982	126.052	132.585	116.977	132.217	133.602	133.038	133.48
SD=5	Sim48	133.938	123.88	134.683	133.071	137.295	130.017	134.154	130.837	139.402	133.685	134.101	133.201	135.012	134.765	128.63	128.226	132.368	133.289	128.331	129.069
SD=5	Sim49	132.818	127.045	135.732	133.817	126.601	132.814	136.183	135.236	137.646	130.721	137.35	132.585	128.025	131.617	138.162	131.729	137.234	121.157	133.667	134.964
SD=5	Sim50	138.601	145.34	145.717	139.194	128.235	142.717	140.647	139.363	132.46	133.182	145.233	142.879	138.678	144.815	143.11	140.209	138.793	137.576	141.175	137.453
SD=5	Sim51	139.047	134.421	123.099	135.877	120.54	127.328	136.166	139.413	122.586	133.979	126.709	127.827	130.854	133.415	132.315	126.39	126.898	135.976	120.43	133.889
SD=5	Sim52	134.954	139.245	132.307	125.906	129.668	144.435	141.886	132.677	135.361	133.552	137.485	129.302	130.996	142.361	135.424	139.214	135.391	137.132	133.929	128.062
SD=5	Sim53	142.054	133.879	135.417	133.535	127.485	136.778	131.633	134.782	141.625	137.991	147.853	136.134	138.252	134.44	136.973	138.062	142.217	138.557	143.63	128.066
SD=5	Sim54	136.517	129.36	131.711	133.817	132.299	140.795	132.137	138.681	139.48	138.845	129.73	149.637	140.382	135.133	142.324	138.267	132.95	133.305	138.334	135.568
SD=5	Sim55	127.317	132.274	134.268	122.917	129.194	131.074	120.525	125.048	136.997	136.921	135.96	133.073	127.186	132.209	134.002	139.81	133.834	126.264	133.453	136.776
SD=5	Sim56	122.937	141.507	132.488	126.189	137.081	124.476	133.123	134.813	127.004	140.579	125.387	132.64	135.604	139.933	131.499	132.373	129.475	137.27	140.752	133.885
SD=5	Sim57	129.415	129.923	133.257	138.926	137.952	130.549	121.823	127.079	143.488	126.524	127.738	132.651	134.963	136.392	130.097	135.348	131.355	126.208	127.275	131.651
SD=5	Sim58	146.349	143.04	134.444	134.893	141.799	134.695	136.24	139.614	132.846	143.755	139.864	137.295	137.203	130.62	142.586	146.669	138.586	140.92	137.332	136.29
SD=5	Sim59	137.345	133.386	135.906	148.051	148.415	133.976	139.42	136.692	137.537	142.044	143.743	131.564	139.636	140.549	132.293	140.974	130.336	132.761	133.616	141.385
SD=5	Sim60	140.605	129.187	128.506	127.724	125.527	132.154	136.221	134.27	135.7	135.229	134.098	135.772	135.597	131.622	137.248	137.444	130.273	128.991	129.622	130.502
SD=5	Sim61	132.122	134.152	129.56	143.347	132.982	135.054	131.351	133.367	131.054	128.607	132.945	139.581	136.585	125.452	125.891	130.853	126.888	125.852	134.958	132.837
SD=5	Sim62	140.722	132.705	138.395	140.748	135.278	138.631	138.569	138.907	136.697	135.059	135.051	139.79	129.294	132.965	133.07	136.395	131.755	131.376	126.405	137.113
SD=5	Sim63	129.875	128.871	128.537	133.08	133.265	127.3	132.57	140.145	128.677	135.36	124.308	126.846	140.694	134.059	138.926	128.403	128.832	130.028	140.962	127.812
SD=5	Sim64	128.179	135.722	127.668	122.116	133.89	133.336	130.45	136.793	144.067	128.457	124.074	133.461	137.322	129.108	128.943	138.933	127.999	126.534	122.609	137.522
SD=5	Sim65	132.956	125.639	123.073	130.922	129.574	127.21	129.574	130.913	133.892	135.539	134.86	127.809	129.552	137.557	123.81	134.005	133.497	141.516	130.586	134.868
SD=5	Sim66	129.221	128.807	147.687	141.087	132.782	134.773	142.014	139.968	135.165	138.558	133.532	133.965	131.423	138.352	137.718	143.45	135.144	137.342	128.027	146.139
SD=5	Sim67	138.045	130.996	128.755	134.273	125.619	134.912	122.821	140.534	139.43	129.106	127.445	137.803	133.447	137.187	131.571	127.526	142.966	140.685	128.835	139.172
SD=5	Sim68	133.92	133.123	134.171	142.396	134.808	139.518	135.882	134.523	133.446	125.867	132.433	136.886	133.891	126.861	130.947	136.264	135.236	137.612	139.799	137.384
SD=5	Sim69	134.087	126.543	132.08	135.843	134.803	133.102	135.298	135.472	133.048	126.893	138.484	129.677	140.459	134.124	133.818	131.731	138.236	127.06	137.595	141.081
SD=5	Sim70	134.572	133.1	123.323	133.298	129.714	134.115	124.912	136.939	136.045	136.086	126.241	134.078	134.107	135.456	133.812	125.872	133.441	130.112	128.799	136.595
SD=5	Sim71	143.944	142.062	149.332	133.796	144.167	138.882	143.045	138.313	134.49	129.795	135.289	137.936	143.299	131.857	146.131	140.456	139.275	134.736	132.021	136.837
SD=5	Sim72	142.011	135.225	135.838	131.659	142.078	138.289	137.477	132.753	134.288	131.628	139.958	130.313	149.907	129.737	130.523	127.681	143.852	131.031	141.901	137.588
SD=5	Sim73	137.62	131.387	139.761	130.782	142.495	137.622	139.024	145.973	136.25	138.014	128.929	137.234	133.942	132.064	137.707	139.216	133.601	141.552	139.906	141.854
SD=5	Sim74	135.492	138.347	139.797	132.552	136.153	137.851	124.345	131.984	133.613	135.037	133.806	131.513	132.741	130.964	142.353	136.856	143.362	129.546	137.487	137.509
SD=5	Sim75	128.129	137.152	131.805	139.475	143.354	140.482	140.357	138.07	139.334	138.859	138.915	139.784	143.523	137.579	139.692	133.664	145.714	131.887	132.557	141.325
SD=5	Sim76	133.402	124.881	133.064	123.912	132.048	135.446	121.472	126.062	135.12	130.238	135.57	140.395	133.05	121.915	135.589	126.152	130.726	130.76	130.99	132.954
SD=5	Sim77	126.263	132.831	135.437	131.941	131.497	128.119	134.011	131.939	129.459	137.722	138.836	133.634	134.058	140.451	124.197	128.197	131.173	136.468	128.65	142.27
SD=5	Sim78	138.7	132.683	146.359	145.112	138.302	144.904	135.23	140.647	139.236	137.461	137.398	135.54	139.018	138.145	133.439	133.918	135.367	143.614	133.663	136.289
SD=5	Sim79	136.62	129.467	138.212	124.573	142.035	134.697	127.712	131.074	136.928	135.162	127.144	135.466	137.769	132.268	135.369	129.037	129.555	141.749	137.078	129.634
SD=5	Sim80	125.027	126.828	132.581	141.081	134.247	139.871	138.607	138.281	140.679	134.535	134.463	134.539	132.851	128.133	129.553	141.452	124.8	130.283	128.213	130.406
SD=5	Sim81	138.329	136.415	140.953	139.056	140.035	147.099	132.604	147.015	130.023	133.749	138.828	134.589	149.604	130.358	137.751	139.162	138.053	143.008	128.709	135.276
SD=5	Sim82	137.855	130.105	142.266	134.928	131.114	128.037	135.5	133.244	137.435	136.697	127.619	132.656	143.458	128.656	131.049	132.867	136.883	134.246	140.502	133.321
SD=5	Sim83	121.921	126.348	125.511	138.201	131.513	124.027	132.919	130.995	137.551	136.068	129.882	135.213	137.094	131.613	133.946	125.282	134.51	135.217	137.717	136.546
SD=5	Sim84	138.853	133.229	132.615	132.172	137.276	135.957	132.787	130.87	128.795	127.52	130.718	128.721	120.551	138.57	137.799	131.928	134.787	127.084	140.268	137.091
SD=5	Sim85	139.25	138.281	137.198	134.971	139.407	142.666	134.842	132.505	133.677	135.057	135.916	136.47	132.306	142.202	133.859	140.903	128.832	132.416	129.112	134.159
SD=5	Sim86	140.511	137.846	139.097	131.133	133.862	140.292	134.362	142.225	131.935	132.844	143.374	136.234	133.723	138.858	136.932	139.863	123.744	137.681	145.256	135.799
SD=5	Sim87	139.995	136.227	138.201	140.144	132.19	133.504	136.699	146.17	134.623	145.883	132.616	137.349	137.913	137.437	145.233	134.337	134.487	136.755	123.483	133.457
SD=5	Sim88	142.789	143.645	133.605	141.557	136.089	133.533	143.948	133.659	137.679	140.024	131.082	142.642	140.383	129.999	143.547	131.884	146.681	134.45	140.426	138.617
SD=5	Sim89	124.983	129.465	141.215	135.843	134.33	125.96	119.63	119.469	125.687	133.846	125.892	133.739	129.333	132.749	127.457	127.639	131.501	136.145	131.682	129.374
SD=5	Sim90	143.328	135.949	137.542	129.934	139.542	137.325	135.29	134.708	140.679	128.45	139.866	142.331	135.599	132.301	132.661	146.311	133.119	141.834	140.591	144.965
SD=5	Sim91	141.982	134.469	131.153	136.265	127.241	133.168	128.768	132.403	133.055	124.702	123.211	139.694	137.327	133.304	132.456	139.536	137.848	134.686	130.678	129.602
SD=5	Sim92	128.268	122.06	126.157	127.577	129.932	140.065	121.473	132.913	131.826	136.674	127.233	121.95	127.313	137.595	129.168	127.579	131.249	130.142	122.713	129.785
SD=5	Sim93	133.013	134.689	137.603	131.689	124.857	139.505	136.71	135.339	133.221	131.016	138.192	135.447	128.759	130.794	133.045	141.991	137.085	131.37	122.147	131
SD=5	Sim94	140.788	147.352	144.116	135.371	133.274	151.382	133.988	134.982	137.818	127.968	139.081	132.079	137.564	139.688	139.12	134.616	138.343	136.741	132.543	131.098
SD=5	Sim95	133.056	129.374	132.212	130.692	130.551	133.642	138.995	128.334	136.604	130.72	134.974	130.224	134.226	132.813	127.945	132.463	134.379	130.234	137.097	124.32
SD=5	Sim96	132.853	135.021	141.281	135.116	135.32	141.495	126.634	130.275	128.011	141.488	137.407	133.172	133.853	137.096	138.617	134.628	137.2	131.145	131.052	138.319
SD=5	Sim97	136.746	129.406	125.362	128.285	125.392	140.08	132.571	134.67	131.504	133.323	130.574	127.464	140.263	138.131	131.737	132.006	134.062	133.781	130.242	135.97
SD=5	Sim98	138.333	134.536	143.598	138.991	142.295	136.957	140.733	138.129	141.517	147.557	145.028	134.48	134.814	128.444	132.434	140.418	133.657	136.804	138.837	141.296
SD=5	Sim99	130.884	127.864	133.85	133.094	134.137	132.076	132.982	141.06	133.725	132.606	135.923	120.677	140.577	127.454	128.024	126.614	135.248	137.746	130.312	126.062
Result	ID	SBP01	SBP02	SBP03	SBP04	SBP05	SBP06	SBP07	SBP08	SBP09	SBP10	SBP11	SBP12	SBP13	SBP14	SBP15	SBP16	SBP17	SBP18	SBP19	SBP20
SD=10	Sim00	123.994	139.167	136.155	143.115	125.872	138.893	139.18	139.967	116.502	143.903	115.304	143.029	141.667	131.555	130.181	132.18	134.789	116.362	133.493	142.015
SD=10	Sim01	116.09	139.56	113.779	142.313	134.767	123.006	121.22	123.569	123.826	136.807	145.577	123.989	124.028	132.391	133.114	133.701	124.51	133.192	138.96	126.338
SD=10	Sim02	148.803	128.526	146.413	111.186	133.655	127.267	124.21	149.22	127.917	133.448	134.123	133.824	125.242	143.88	135.669	129.346	143.611	144.355	132.971	142.728
SD=10	Sim03	125.683	136.755	139.744	147.325	142.589	130.164	125.164	142.197	130.419	147.026	142.435	135.914	150.551	133.229	143.691	123.941	117.885	131.896	121.449	157.885
SD=10	Sim04	137.652	136.365	126.815	145.604	131.661	134.327	101.925	142.424	140.508	133.549	129.101	125.065	131.463	125.247	122.486	154.629	131.338	134.807	125.31	121.054
SD=10	Sim05	121.144	125.445	139.295	137.075	132.859	130.397	128.871	124.275	131.254	128.696	132.347	114.652	130.576	119.2	147.075	125.129	120.135	120.444	152.919	129.263
SD=10	Sim06	118.829	146.385	145.691	146.847	132.499	163.204	129.635	146.287	141.079	141.335	135.549	144.644	146.12	133.043	137.444	149.74	114.11	145.987	135.907	129.255
SD=10	Sim07	114.751	129.859	141.737	140.381	116.957	142.711	157.009	126.272	125.055	151.435	149.648	127.87	133.608	137.807	121.195	134.374	114.386	118.65	138.067	139.647
SD=10	Sim08	127.881	137.242	149.486	137.189	147.776	117.845	132.367	134.28	142.615	143.192	130.05	148.061	126.748	131.18	126.829	143.439	129.666	139.914	143.584	137.316
SD=10	Sim09	121.439	142.982	123.091	122.368	142.06	115.348	136.641	121.005	138.865	127.451	141.724	118.263	136.752	127.238	120.484	154.345	145.703	134.523	160.489	123.839
SD=10	Sim10	152.974	129.494	150.668	130.52	127.168	118.573	143.288	137.502	145.147	146.619	154.017	137.014	117.874	138.177	128.546	130.274	150.043	125.318	151.531	122.048
SD=10	Sim11	144.73	135.015	126.495	155.946	120.033	127.093	144.753	137.491	135.713	144.433	136.402	132.465	134.949	131.735	141.915	136.979	139.657	150.101	123.657	148.657
SD=10	Sim12	139.679	145.681	126.969	148.869	142.162	120.853	143.52	143.241	132.18	127.371	117.203	147.471	140.321	146.232	129.337	142.241	124.058	126.794	138.492	120.438
SD=10	Sim13	133.772	123.285	131.229	141.869	117.027	131.604	129.011	128.239	125.475	133.045	151.104	131.045	121.396	125.066	134.445	140.69	146.913	136.103	132.795	130.505
SD=10	Sim14	138.527	126.309	162.32	133.273	138.048	127.865	154.523	148.422	157.531	125.404	152.896	145.557	134.479	127.178	132.222	135.241	148.67	145.12	113.507	142.387
SD=10	Sim15	130.455	113.539	120.558	138.402	119.4	144.09	132.899	121.405	135.505	118.058	125.486	136.828	127.362	129.186	143.062	129.057	123.695	132.345	155.545	148.282
SD=10	Sim16	138.55	138.308	146.383	154.86	133.99	148.148	127.631	145.44	147.445	126.288	157.105	131.209	128.168	113.501	123.585	124.67	135.746	142.191	136.792	131.305
SD=10	Sim17	140.011	118.457	142.293	154.811	135.494	144.092	131.494	142.412	140.013	127.718	126.733	128.807	140.222	130.081	136.349	131.845	138.411	128.943	135.296	117.644
SD=10	Sim18	129.998	136.128	146.543	135.012	142.305	150.015	145.149	141.414	154.309	136.618	127.184	123.368	132.717	136.139	128.943	129.929	138.593	148.785	126.753	115.335
SD=10	Sim19	148.531	136.467	134.727	154.701	128.877	131.609	135.333	135.304	153.378	146.437	133.651	140.973	125.82	133.812	142.389	136.477	134.085	126.864	144.61	136.331
SD=10	Sim20	119.629	137.856	112.465	132.792	137.296	154.084	128.219	121.581	122.616	145.035	134.571	138.279	135.554	120.139	122.707	133.834	145.601	138.032	124.333	126.805
SD=10	Sim21	131.843	128.451	147.696	134.97	131.451	145.007	123.271	141.701	141.936	128.904	126.876	125.257	140.338	141.945	131.085	130.99	117.396	114.487	144.449	141.091
SD=10	Sim22	155.722	143.487	147.146	134.599	128.379	149.088	149.709	136.181	121.263	130.376	136.412	142.629	147.337	152.815	125.249	156.189	135.895	139.201	134.46	154.234
SD=10	Sim23	136.069	121.686	133.33	141.467	133.042	135.898	124.105	149.546	140.414	125.916	162.941	132.746	141.557	125.328	155.678	147.165	138.818	135.139	139.622	133.736
SD=10	Sim24	148.436	137.431	133.877	109.787	137.32	120.755	127.255	124.351	141.798	116.223	127.392	134.059	144.453	127.683	136.664	124.702	140.919	137.8	142.754	147.563
SD=10	Sim25	128.586	114.597	127.935	141.11	128.645	125.728	126.122	125.854	139.729	127.834	107.135	139.006	134.271	101.32	129.689	142.745	126.948	127.288	130.064	135.183
SD=10	Sim26	118.368	136.738	132.373	128.959	131.22	148.791	144.543	144.728	129.245	140.803	146.277	131.778	137.858	152.034	121.397	141.934	145.033	127.503	144.788	128.273
SD=10	Sim27	135.196	142.571	121.702	124.541	147.952	129.212	121.614	131.854	131.761	114.353	123.074	136.038	129.891	126.001	142.68	136.063	127.893	141.531	131.974	143.341
SD=10	Sim28	158.621	143.586	132.454	139.127	145.154	138.214	147.602	147.855	149.561	146.868	120.289	143.194	130.632	135.301	152.054	136.632	150.403	124.59	143.944	135.829
SD=10	Sim29	142.163	151.297	147.016	137.495	127.173	135.727	146.992	132.121	152.7	142.02	131.933	136.178	142.714	134.887	130.124	141.389	133.994	140.889	134.722	135.168
SD=10	Sim30	114.718	145.804	156.386	124.836	129.36	118.241	115.233	118.542	111.781	130.697	122.997	122.992	144.338	132.546	129.379	137.351	145.939	136.055	128.786	120.166
SD=10	Sim31	151.465	135.713	144.178	139.144	141.464	139.987	138.511	140.316	130.729	128.967	127.646	150.903	114.735	149.257	125.583	138.263	135.731	129.039	141.752	134.318
SD=10	Sim32	125.155	140.072	133.523	117.028	132.031	142.528	124.374	128.663	128.107	148.883	140.774	140.372	150.397	122.755	117.793	134.338	121.785	126.498	122.372	102.009
SD=10	Sim33	134.061	139.006	135.768	134.342	143.358	140.908	140.488	149.811	142.092	126.11	143.186	121.867	131.943	129.576	146.096	129.541	128.373	154.835	140.995	145.241
SD=10	Sim34	140.123	124.889	145.184	116.396	126.127	138.092	110.792	158.155	136.427	126.082	132.842	135.896	141.21	139.696	122.621	142.732	130.986	134.127	138.992	133.624
SD=10	Sim35	132.194	126.795	107.383	127.313	135.677	134.152	128.451	129.844	147.749	124.464	132.103	137.544	139.245	128.861	141.556	143.033	132.962	146.07	141.277	135.321
SD=10	Sim36	155.186	131.853	150.53	128.954	151.198	129.111	136.916	134.37	135.898	143.871	125.726	148.272	140.408	158.122	121.618	143.217	120.655	139.013	138.378	142.143
SD=10	Sim37	129.844	136.882	117.936	144.761	127.771	121.546	134.672	131.512	134.542	113.201	133.464	137.009	127.721	137.791	112.042	128.221	143.245	126.425	135.609	142.619
SD=10	Sim38	121.059	124.255	126.542	154.066	135.914	148.993	143.013	138.97	118.422	146.666	134.589	130.965	98.0593	124.437	156.683	137.971	148.152	134.967	136.414	142.505
SD=10	Sim39	120.992	129.106	128.331	133.354	134.024	139.655	111.764	121.002	130.267	150.238	126.806	138.236	140.23	149.914	151.819	141.064	130.006	128.83	128.896	142.245
SD=10	Sim40	124.331	151.094	134.396	136.146	126.948	124.557	130.816	153.435	131.043	139.172	149.675	132.077	149.939	141.426	124.257	138.377	137.152	140.259	138.908	139.791
SD=10	Sim41	148	132.885	127.43	141.941	130.724	132.108	105.399	142.967	139.976	132.361	136.43	143.994	121.88	152.223	149.388	144.997	148.824	152.572	142.595	148.048
SD=10	Sim42	123.411	132.708	114.157	137.521	117.875	121.712	129.842	116.177	136.534	139.323	148.262	139.261	139.603	130.463	137.872	141.75	137.037	129.117	121.594	129.497
SD=10	Sim43	134.13	135.191	156.657	145.249	155.32	120.918	153.837	139.913	127.154	130.905	142.368	134.591	134.838	149.447	144.106	120.768	141.653	126.328	139.663	141.505
SD=10	Sim44	143.995	127.383	126.895	135.246	126.694	151.702	140.638	132.236	127.074	128.767	151.564	136.282	140.295	135.522	133.733	140.459	123.348	131.681	128.365	121.755
SD=10	Sim45	138.735	151.261	140.815	138.281	142.59	146.257	138.286	130.364	134.663	142.708	133.964	142.277	125.028	119.239	138.328	140.512	142.239	141.044	132.371	122.03
SD=10	Sim46	144.356	146.167	146.979	134.276	134.568	145.503	139.052	131.471	131.633	131.101	120.41	132.032	143.091	128.652	127.767	147.535	122.506	138.362	140.183	137.962
SD=10	Sim47	141.601	122.149	126.998	114.32	136.672	117.177	130.347	134.399	138.097	108.72	136.403	126.825	135.553	119.562	144.852	133.072	109.4	126.329	121.651	131.338
SD=10	Sim48	139.925	122.485	146.311	121.506	119.781	129.756	131.909	130.769	145.824	138.922	131.866	131.62	145.914	126.198	119.713	119.426	135.377	154.686	133.397	135.208
SD=10	Sim49	127.551	122.002	148.6	132.536	143.272	141.167	132.444	153.603	128.201	150.439	123.072	139.613	136.341	125.858	141.405	152.837	129.105	141.776	129.828	141.565
SD=10	Sim50	153.483	134.371	141.124	143.132	135.094	130.181	141.744	134.156	133.735	146.266	144.338	147.138	145.157	143.232	141.232	144.46	137.307	137.639	156.438	148.387
SD=10	Sim51	132.147	125.671	141.268	163.002	118.87	128.91	129.191	156.637	136.545	132.211	126.033	120.762	126.871	123.777	144.547	120.713	139.783	128.581	124.363	147.592
SD=10	Sim52	136.326	132.601	141.811	149.578	135.534	143.296	128.185	150.292	124.643	151.484	134.89	138.738	155.061	135.206	145.821	133.238	134.53	131.887	152.979	133.513
SD=10	Sim53	143.603	133.261	135.001	138.299	129.748	155.936	125.227	129.204	129.183	113.717	127.356	144.902	133.012	141.765	121.75	139.843	119.182	140.349	156.267	129.452
SD=10	Sim54	135.346	136.533	132.771	160.476	140.486	127.537	136.012	133.045	134.255	123.651	133.377	161.159	124.24	134.039	136.308	138.371	141.13	131.955	129.146	150.149
SD=10	Sim55	138.728	134.014	150.676	128.717	134.39	147.735	134.611	123.486	127.786	150.39	132.382	134.501	140.389	139.52	128.126	127.479	134.477	149.95	146.757	147.629
SD=10	Sim56	119.806	142.721	130.141	155.883	143.945	120.577	138.471	121.092	126.875	135.193	125.612	131.369	133.111	147.094	150.121	130.049	139.851	128.099	123.776	122.334
SD=10	Sim57	117.025	128.43	127.085	123.968	117.543	147.233	129.509	131.587	116.199	136.366	143.104	141.225	126.027	134.406	138.97	118.147	124.488	124.411	132.171	132.598
SD=10	Sim58	155.426	146.668	148.777	153.094	124.922	140.663	145.93	147.668	136.941	127.939	138.892	151.799	142.93	151.571	133.183	130.963	141.029	145.053	129.838	122.103
SD=10	Sim59	157.834	152.422	121.179	129.464	141.884	154.978	152.729	124.351	139.729	140.239	134.823	152.569	142.618	154.226	131.363	137.784	112.511	144.378	131.229	155.073
SD=10	Sim60	130.002	137.632	145.795	122.869	136.907	131.074	110.271	122.648	120.496	139.919	132.36	124.479	125.366	144.415	128.404	146.411	129.547	134.253	139.787	129.144
SD=10	Sim61	135.825	144.248	139.522	120.038	131.008	136.786	119.842	136.944	138.032	143.865	137.253	146.84	129.849	130.596	129.551	135.88	132.266	134.775	113.81	144.15
SD=10	Sim62	126.694	131.251	128.908	140.816	131.442	152.873	111.12	134.152	129.594	137.302	149.89	119.27	138.198	131.282	137.176	122.92	144.962	134.987	126.724	132.647
SD=10	Sim63	130.606	135.662	135.315	139.74	127.276	129.101	123.896	137.981	135.495	140.087	131.553	129.729	121.126	140.525	124.197	118.135	123.987	135.816	131.942	120.495
SD=10	Sim64	138.663	124.224	115.877	142.492	144.362	146.93	128.884	125.18	138.013	151.695	116.849	127.769	145.104	130.388	125.527	125.634	136.116	100.854	129.407	138.542
SD=10	Sim65	131.846	121.113	133.326	128.176	125.762	122.227	115.103	135.748	134.205	127.898	129.199	114.317	129.821	141.065	139.61	144.11	132.03	121.253	137.351	130.664
SD=10	Sim66	129.31	139.477	128.85	137.012	135.246	128.412	138.749	117.161	125.222	141.477	141.684	140.027	110.924	121.309	133.52	133.537	135.996	149.668	124.914	126.976
SD=10	Sim67	143.155	130.644	138.823	143.493	134.348	133.301	143.204	136.568	151.477	116.128	134.758	154.771	147.739	142.164	123.362	138.795	140.463	113.948	134.374	128.3
SD=10	Sim68	129.826	134.174	137.402	134.228	115.565	128.348	144.09	139.272	141.268	149.3	134.682	124.173	137.48	131.491	135.686	149.251	139.588	134.063	130.204	139.8
SD=10	Sim69	136.19	128.359	137.941	123.948	128.312	136.05	121.349	148.879	120.62	141.177	122.158	124.006	126.647	117.853	128.55	127.82	136.416	133.7	124.593	141.561
SD=10	Sim70	129.906	130.114	133.297	152.509	132.248	131.824	138.06	156.179	118.528	115.233	138.512	141.596	135.756	130.121	164.539	136.791	140.946	137.527	148.634	160.748
SD=10	Sim71	135.147	134.319	148.116	134.912	145.272	147.74	148.959	133.135	135.774	131.137	140.018	137.822	139.041	128.082	142.127	145.958	131.819	148.087	139.695	129.839
SD=10	Sim72	152.991	136.085	126.693	145.387	138.117	145.168	132.109	125.106	161.347	148.23	143.123	144.145	143.102	144.883	133.377	138.816	147.401	145.835	144.298	136.065
SD=10	Sim73	140.136	147.583	136.256	136.035	132.252	141.15	142.058	127.833	125.248	144.918	137.099	147.789	138.206	133.796	130.3	137.61	129.698	143.063	136.385	126.431
SD=10	Sim74	136.365	141.064	121.936	132.121	150.045	137.664	151.827	137.424	121.082	125.485	127.765	142.22	133.087	144.431	142.97	118.451	131.291	132.967	150.85	143.822
SD=10	Sim75	132.808	125.469	135.302	147.111	135.851	161.227	138.91	110.637	137.452	129.155	141.446	137.84	139.794	134.41	125.936	150.901	119.579	141.402	137.71	130.378
SD=10	Sim76	126.81	141.807	118.813	128.803	136.294	121.173	141.027	126.272	136.534	141.856	134.771	135.73	125.905	133.771	136.555	137.694	130.93	130.614	128.125	149.523
SD=10	Sim77	122.578	135.904	139.51	139.212	125.25	126.686	136.21	132.354	118.753	136.096	143.042	125.37	129.44	124.332	129.481	114.882	123.555	134.835	115.056	122.851
SD=10	Sim78	136.773	136.933	148.855	140.672	142.2	148.417	156.126	158.129	133.374	136.514	124.273	140.81	152.788	130.065	143.718	149.267	137.249	145.994	130.34	147.478
SD=10	Sim79	134.397	116.62	125.95	136.942	114.347	113.487	134.967	122.095	121.336	139.056	141.656	125.269	133.072	133.741	134.767	137.259	141.316	139.448	144.929	137.236
SD=10	Sim80	132.715	122.697	145.628	137.198	126.289	138.756	137.991	145.168	126.655	135.792	109.933	123.989	127.81	136.881	137.968	123.87	144.226	141.129	124.479	121.987
SD=10	Sim81	132.636	144.437	151.334	122.296	144.329	128.11	117.073	120.174	136.611	152.251	117.519	135.734	136.274	159.144	146.532	132.166	132.63	138.379	140.355	120.827
SD=10	Sim82	139.752	141.057	144.577	136.056	124.32	153.285	131.905	127.401	132.861	129.634	152.548	133.379	148.232	130.238	138.759	135.035	139.643	130.975	133.099	141.462
SD=10	Sim83	130.177	134.471	127.476	142.275	148.716	137.492	113.135	125.079	106.445	116.856	139.292	130.701	122.628	128.927	138.794	148.364	132.482	135.451	132.997	135.731
SD=10	Sim84	138.65	133.856	124.014	130.137	137.254	134.217	137.252	140.834	138.524	144.221	145.964	143.151	127.82	146.7	131.46	127.878	119.191	117.742	157.64	123.852
SD=10	Sim85	109.422	136.712	137.697	133.741	125.237	138.912	127.691	148.027	136.575	140.02	138.705	133.509	139.85	130.886	132.709	135.144	113.811	149.758	144.421	155.858
SD=10	Sim86	132.628	143.647	146.331	121.731	129.265	126.755	138.832	130.872	131.25	141.925	129.516	138.186	145.956	149.013	132.617	135.217	137.578	114.115	125.89	149.823
SD=10	Sim87	123.883	142.087	148.822	142.362	138.821	146.279	116.513	151.023	144.032	143.89	145.078	139.334	141.821	119.398	138.881	138.803	130.974	147.925	125.947	141.436
SD=10	Sim88	147.523	133.556	135.008	141.15	124.009	132.142	143.943	143.429	147.124	148.471	138.821	146.477	140.015	143.348	138.578	120.695	137.311	124.183	146.346	127.286
SD=10	Sim89	123.69	131.718	144.716	120.853	138.524	135.57	131.736	137.218	131.678	117.935	110.463	134.748	136.982	139.497	136.662	152.097	144.518	130.682	124.396	111.9
SD=10	Sim90	138.056	131.515	139.612	136.298	156.183	146.583	123.674	131.239	143.324	133.917	142.2	138.843	131.45	141.195	128.418	139.159	158.546	127.248	142.66	128.929
SD=10	Sim91	139.373	137.565	120.454	127.478	133.419	141.973	153.434	123.573	130.948	129.574	147.064	140.762	120.847	142.945	138.19	118.541	144.372	128.401	144.277	140.233
SD=10	Sim92	145.794	135.51	116.29	129.473	130.294	139.761	142.177	133.852	141.101	140.504	143.331	139.907	140.955	140.017	128.251	127.281	128.281	138.61	135.059	125.043
SD=10	Sim93	120.624	111.487	137.611	118.032	131.4	137.834	129.987	137.474	125.548	132.049	148.369	126.177	139.856	115.463	145.448	131.696	122.898	124.819	148.624	136.163
SD=10	Sim94	144.925	135.487	131.226	134.544	128.912	127.299	124.827	137.417	124.598	131.876	147.688	132.267	135.554	132.24	133.905	127.749	117.863	135.431	144.161	111.492
SD=10	Sim95	128.462	128.156	141.058	124.892	136.703	151.208	126.455	135.598	122.523	121.223	141.19	146.655	129.052	124.512	157.994	136.029	129.642	145.428	139.112	161.221
SD=10	Sim96	134.308	142.311	129.132	135.258	135.73	134.89	135.398	117.805	129.58	149.261	132.874	124.784	145.946	158.034	119.868	140.314	141.049	134.605	139.617	139.082
SD=10	Sim97	134.145	128.139	122.584	135.533	124.084	137.034	152.452	116.665	133.67	127.853	120.324	137.72	129.257	147.194	132.975	134.776	110.958	138.424	145.043	132.632
SD=10	Sim98	127.899	125.616	136.108	149.617	132.237	127.925	144.757	131.587	147.583	134.041	144.925	137.833	137.445	143.613	141.552	115.299	154.124	157.448	141.664	127.214
SD=10	Sim99	126.611	136.512	132.909	143.248	140.499	132.499	116.642	132.134	133.361	124.182	137.391	146.196	129.644	135.368	133.387	154.297	130.821	125.897	130.226	132.636
Result	ID	SBP01	SBP02	SBP03	SBP04	SBP05	SBP06	SBP07	SBP08	SBP09	SBP10	SBP11	SBP12	SBP13	SBP14	SBP15	SBP16	SBP17	SBP18	SBP19	SBP20
SD=15	Sim00	120.514	103.894	139.59	143.767	120.518	115.02	123.108	115.855	126.417	119.835	114.664	129.637	121.217	134.555	139.327	146.408	185.412	143.993	126.931	137.428
SD=15	Sim01	111.918	145.785	134.984	148.114	148.455	134.383	112.802	135.241	116.999	130.971	109.986	137.594	139.672	145.175	117.656	131.632	133.459	147.218	144.63	139.827
SD=15	Sim02	132.26	106.624	140.395	135.754	138.487	122.47	129.462	133.41	142.515	135.784	161.592	98.0077	132.289	142.415	122.038	135.025	150.988	141.386	133.656	153.918
SD=15	Sim03	130.666	165.917	146.031	113.386	142.716	136.38	135.562	122.942	163.827	146.53	152.385	139.137	155.739	139.622	135.996	119.456	134.625	135.679	129.145	95.1535
SD=15	Sim04	142.369	121.725	121.991	113.431	132.959	124.318	126.688	143.161	148.287	132.506	119.246	135.758	101.499	112.436	138.775	127.703	114.567	128.002	163.463	122.206
SD=15	Sim05	137.004	128.023	136.266	112.517	153.852	134.155	144.504	162.406	133.32	150.23	125.454	132.371	143.954	146.781	133.494	144.183	118.516	131.743	110.191	139.556
SD=15	Sim06	155.358	127.162	138.305	142.072	141.907	139.162	121.742	157.119	143.487	127.478	129.63	144.915	148.405	145.511	153.295	152.548	144.379	124.764	157.773	141.213
SD=15	Sim07	157.393	110.049	126.448	123.588	131.774	122.819	159.139	116.125	123.606	146.756	148.754	147.964	115.515	135.69	94.5061	116.822	137.538	134.558	120.706	150.033
SD=15	Sim08	126.985	113.053	114.201	168.158	146.3	98.8047	157.102	142.516	139.795	121.892	142.809	107.632	146.633	129.904	122.634	152.202	133.875	150.011	166.858	138.187
SD=15	Sim09	135.255	131.059	108.872	145.981	125.259	106.667	111.394	127.947	136.484	134.457	147.034	136.861	126.148	116.193	110.812	137.505	131.005	157.305	140.318	112.626
SD=15	Sim10	115.648	151.517	132.468	113.855	109.965	138.825	138.121	139.241	167.583	129.997	127.513	139.246	99.935	144.593	136.334	135.331	121.143	161.369	139.388	139.926
SD=15	Sim11	109.6	125.628	126.398	142.778	109.487	146.581	132.722	137.439	118.843	136.95	144.865	144.198	144.701	133.354	125.086	149.586	128.112	128.797	147.997	155.03
SD=15	Sim12	129.913	121.247	129.623	123.992	117.695	116.206	129.542	115.968	117.735	141.558	140.052	140.076	151.57	140.802	149.351	155.416	138.393	123.623	124.251	132.672
SD=15	Sim13	140.943	140.639	118.297	150.977	128.792	129.249	135.06	141.541	155.11	115.527	159.509	144.68	145.539	126.925	143.085	143.257	131.05	135.434	132.172	121.617
SD=15	Sim14	124.949	139.03	110.02	110.77	143.865	137.171	159.628	148.415	152.367	152.506	148.057	126.114	153.497	176.891	147.14	145.866	160.588	144.962	139.537	111.036
SD=15	Sim15	136.307	119.923	145.141	112.664	127.801	138.048	131.139	139.78	100.487	125.546	109.139	160.445	135.856	124.405	123.327	129.358	108.51	127.085	136.932	158.301
SD=15	Sim16	133.035	163.129	143.378	136.019	124.212	124.8	143.09	124.464	131.569	135.323	144.202	146.402	130.342	129.99	124.795	120.621	142.637	133.87	161.587	145.669
SD=15	Sim17	131.028	134.527	116.538	124.111	132.341	137.678	156.704	119.476	139.263	155.559	163.363	117.476	115.855	118.477	156.319	149.105	120.401	116.739	112.946	140.889
SD=15	Sim18	141.926	159.215	143.255	172.56	144.176	149.453	115.348	149.774	147.049	161.347	169.437	136.235	150.379	138.618	102.687	153.938	110.902	140.395	144.031	108.967
SD=15	Sim19	118.067	141.23	107.94	129.931	120.949	155.441	118.614	108.406	147.539	137.854	152.563	111.852	136.584	145.716	131.471	145.249	151.195	133.841	150.773	134.081
SD=15	Sim20	131.917	155.758	110.447	143.051	130.797	140.993	154.163	142.04	120.333	132.423	142.178	136.829	142.863	164.487	131.779	124.199	112.877	131.303	147.64	136.524
SD=15	Sim21	103.605	146.01	127.208	117.766	139.346	140.898	100.587	143.202	128.758	118.465	132.12	136.415	160.119	140.189	134.385	134.945	151.349	150.791	116.532	144.922
SD=15	Sim22	157.07	134.029	117.939	149.73	145.991	146.664	152.512	145.644	157.269	128.348	157.315	156.11	125.906	149.977	117.079	131.505	146.844	127.58	145.645	147.211
SD=15	Sim23	145.203	123.906	161.611	123.631	159.027	181.876	134.813	136.051	120.452	156.743	144.091	148.535	146.219	149.675	146.837	147.57	158.115	135.337	144.185	151.694
SD=15	Sim24	144.519	151.391	134.107	131.754	146.515	141.71	143.144	123.032	137.273	112.643	127.576	123.476	142.696	148.908	111.776	107.436	155.937	149.323	126.574	154.77
SD=15	Sim25	139.763	149.346	110.026	163.062	109.746	153.896	137.339	144.798	112.751	126.833	117.483	106.261	120.369	136.074	123.215	112.908	135.062	134.67	139.035	153.839
SD=15	Sim26	111.719	157.232	113.34	153.682	130.666	152.301	131.214	128.967	103.067	113.666	144.122	159.518	117.768	132.503	152.238	151.106	139.906	134.035	117.877	153.561
SD=15	Sim27	110.432	135.094	137.517	150.605	139.222	147.542	145.9	146.002	150.534	147.182	118.753	113.682	126.548	123.045	118.183	108.751	119.233	123.356	132.31	133.57
SD=15	Sim28	133.626	142.442	118.92	123.686	136.08	135.806	145.265	145.998	128.014	141.341	129.299	138.355	150.841	136.205	136.933	127.613	138.908	123.622	174.838	163.676
SD=15	Sim29	155.891	128.112	132.764	105.525	159.887	117.91	126.569	168.921	146.818	138.044	136.571	143.832	141.404	97.8815	110.446	165.71	141.472	100.559	173.278	134.233
SD=15	Sim30	130.243	144.185	127.439	111.995	133.489	161.894	142.664	113.422	128.646	124.523	99.5023	103.14	124.444	123.231	104.885	103.056	152.452	154.224	122.121	119.024
SD=15	Sim31	125.938	162.98	147.116	154.188	122.976	129.134	137.171	136.324	169.169	155.846	140.041	104.83	114.832	134.617	132.279	152.87	123.715	131.908	116.968	144.034
SD=15	Sim32	139.398	123.286	148.421	137.795	108.703	144.307	109.25	109.787	150.914	150.123	130.52	114.319	151.281	129.392	100.05	136.149	124.358	103.095	140.552	119.709
SD=15	Sim33	139.214	154.236	144.129	149.478	131.022	114.971	163.555	138.693	98.838	140.203	137.777	123.051	127.237	139.055	137.363	132.476	140.058	122.356	152.314	154.754
SD=15	Sim34	130.337	97.6034	143.27	138.349	130.3	133.556	168.951	138.889	137.245	171.752	124.765	144.202	148.224	153.163	155.869	126.205	148.97	141.636	135.535	116.674
SD=15	Sim35	116.205	166.5	128.877	134.659	133.485	124.969	136.438	110.271	114.545	129.587	137.219	131.969	127.957	128.239	122.718	153.504	142.219	143.106	128.115	144.758
SD=15	Sim36	106.92	147.995	140.659	151.661	170.405	145.61	145.707	122.32	117.228	150.269	136.267	140.364	134.026	124.834	161.068	137.485	113.484	126.344	143.238	146.065
SD=15	Sim37	97.3101	138.482	140.492	129.134	131.036	123.572	144.117	102.592	141.521	119.944	121.191	123.469	119.416	119.766	130.518	140.296	151.235	122.351	137.263	118.238
SD=15	Sim38	135.652	141.729	148.224	134.013	137.484	109.512	141.371	170.537	141.192	146.612	150.35	142.086	149.496	132.398	134.497	142.526	152.762	133.178	148.559	114.899
SD=15	Sim39	154.918	140.818	153.227	109.764	144.658	145.982	158.777	169.362	168.871	142.363	128.935	167.705	127.749	146.38	113.991	149.956	116.861	142.192	143.994	96.8243
SD=15	Sim40	139.427	144.811	147.763	136.631	152.358	135.83	145.456	119.664	129.246	122.838	123.565	113.542	121.29	144.049	150.531	111.717	150.99	149.905	110.519	155.581
SD=15	Sim41	169.234	146.29	141.057	151.82	141.168	125.17	113.039	144.077	150.599	125.553	141.321	140.524	147.196	134.205	166.323	131.499	133.436	130.015	150.861	121.095
SD=15	Sim42	142.915	131.331	163.122	119.764	133.504	123.843	122.898	150.423	141.549	140.715	129.27	124.195	142.491	153.704	138.765	114.963	136.931	147.279	148.214	136.653
SD=15	Sim43	151.804	127.124	125.763	108.062	140.686	140.042	168.152	144.18	128.398	127.032	149.128	126.165	140.568	158.568	122.013	117.275	134.445	158.186	107.642	149.356
SD=15	Sim44	105.041	121.845	145.328	131.825	120.782	132.295	158.557	161.165	142.782	138.324	142.978	149.411	141.539	139.95	155.881	161.792	132.456	120.811	131.794	153.998
SD=15	Sim45	174.609	116.831	136.39	137.067	152.335	130.549	146.518	148.13	135.636	149.846	137.62	141.43	133.792	132.305	168.61	127.404	136.528	138.757	148.212	135.537
SD=15	Sim46	134.016	126.305	122.048	151.233	143.92	146.6	152.576	149.315	152.253	144.169	137.506	149.388	120.642	113.143	114.183	129.862	158.551	147.64	154.887	119.193
SD=15	Sim47	124.9	137.065	103.842	127.358	140.534	117.813	139.702	134.374	112.606	144.405	119.611	107.588	152.739	110.068	170.084	122.461	140.529	123.25	113.472	132.463
SD=15	Sim48	124.802	134.959	149.313	138.566	126.585	138.187	152.649	147.462	174.768	127.348	146.492	109.487	126.958	130.458	130.141	144.137	139.826	97.1942	140.758	147.521
SD=15	Sim49	140.858	126.588	146.015	135.356	122.817	123.124	108.701	95.3283	144.679	122.225	129.653	125.836	106.268	126.018	165.502	153.293	135.176	149.33	131.841	130.917
SD=15	Sim50	143.047	149.792	144.413	130.57	139.262	138.098	141.449	138.969	153.265	133.525	172.441	125.627	175.846	128.456	154.556	146.522	151.409	145.831	123.772	130.312
SD=15	Sim51	111.582	105.723	119.415	112.288	173.739	151.527	115.24	132.381	127.511	101.531	138.24	137.27	121.42	108.665	129.423	125.377	136.932	112.466	140.951	144.448
SD=15	Sim52	126.078	118.406	110.821	165.881	115.457	143.152	140.485	120.781	134.659	147.416	136.656	161.416	150.393	131.679	158.359	132.209	150.264	122.226	135.974	155.97
SD=15	Sim53	112.532	128.551	143.951	141.314	123.451	130.263	128.374	124.263	136.11	123.012	171.451	128.2	121.534	133.529	95.2587	154.493	134.106	159.525	134.986	121.138
SD=15	Sim54	122.415	150.577	133.102	149.084	129.77	158.637	147.499	135.382	131.694	148.518	104.553	131.658	112.601	150.1	148.822	130.75	133.279	134.377	133.686	101.571
SD=15	Sim55	134.577	123.982	168.098	152.383	129.168	139.11	138.482	149.875	124.838	112.352	124.541	141.009	134.203	129.985	124.421	123.976	130.406	130.594	136.569	152.328
SD=15	Sim56	132.784	134.526	158.55	136.125	112.205	142.9	163.316	141.768	113.241	119.867	150.743	128.775	120.116	122.53	133.845	127.243	137.858	125.482	147.015	121.958
SD=15	Sim57	112.451	113.809	101.38	120.552	119.187	140.921	115.852	129.092	142.226	127.937	103.845	144.346	131.128	140.522	114.883	149.986	131.75	122.682	145.122	139.606
SD=15	Sim58	159.979	159.827	139.252	135.803	161.624	118.781	133.2	150.411	121.751	128.819	147.266	132.639	137.12	132.572	122.266	146.578	127.872	152.661	158.404	122.822
SD=15	Sim59	128.867	115.478	155.427	144.589	165.269	134.915	152.944	124.919	135.12	142.456	116.009	121.325	154.732	128.436	132.796	124.422	152.699	130.176	135.441	155.937
SD=15	Sim60	139.696	119.75	110.302	142.659	143.939	127.95	150.833	116.089	122.191	135.575	136.287	148.644	117.679	139.738	127.253	146.063	118.095	140.615	146.213	110.422
SD=15	Sim61	132.532	130.222	130.092	127.596	133.833	140.188	146.614	116.971	112.149	140.145	153.516	131.524	138.277	166.775	149.163	138.337	127.97	128.203	152.822	135.031
SD=15	Sim62	167.358	119.064	133.751	166.893	114.647	115.819	178.176	137.684	154.073	158.152	122.962	126.988	148.814	115.003	109.781	130.139	141.942	134.921	134.256	152.691
SD=15	Sim63	126.085	147.64	130.966	131.674	171.913	129.732	108.589	122.284	147.108	162.031	129.709	132.192	118.595	130.8	135.01	132.44	132.192	143.321	118.664	122.896
SD=15	Sim64	123.492	121.43	123.7	117.209	83.2079	138.259	131.05	162.349	141.478	116.021	132.535	166.657	131.77	126.392	124.868	125.042	121.079	131.194	124.587	134.939
SD=15	Sim65	154.18	117.411	111.38	120.215	153.604	141.773	136.517	140.711	123.809	149.706	137.2	119.861	127.224	120.095	125.82	144.233	119.592	124.88	119.133	130.478
SD=15	Sim66	150.062	145.436	123.096	132.126	154.687	157.937	102.583	179.946	134.912	167.355	131.869	143.665	133.396	126.721	136.604	137.745	153.965	113.711	159.893	128.158
SD=15	Sim67	98.0695	118.251	164.697	120.72	115.687	126.759	161.716	133.556	150.567	131.064	136.718	134.111	161.822	143.852	110.021	143.172	138.605	119.265	123.884	146.426
SD=15	Sim68	149.881	156.527	121.045	148.228	148.698	155.241	142.227	153.386	144.858	130.26	149.592	143.562	130.671	160.469	104.469	166.928	145.224	117.946	113.068	137.825
SD=15	Sim69	147.222	138.541	151.952	115.325	121.433	129.467	133.318	151.64	138.216	144.666	143.944	148.821	115.908	108.2	121.328	144.666	173.782	142.818	144.583	129.341
SD=15	Sim70	102.707	141.65	137.499	160.788	124.813	142.191	140.497	130.425	138.879	139.909	130.203	123.767	179.793	90.9745	127.88	152.175	128.125	127.408	115.689	140.807
SD=15	Sim71	137.835	143.744	123.444	145.187	127.014	123.293	182.165	146.873	155.073	134.713	135.996	120.54	120.731	136.666	118.612	130.658	152.208	123.479	163.193	153.751
SD=15	Sim72	142.265	136.788	130.224	136.284	129.635	128.777	123.515	138.219	125.956	151.245	134.961	131.662	123.813	140.703	135.044	126.245	158.541	143.955	143.131	146.141
SD=15	Sim73	146.432	127.715	135.862	153.643	139.789	141.425	129.106	142.773	143.326	137.389	177.295	144.158	120.179	109.095	134.715	152.449	145.026	117.09	135.128	163.102
SD=15	Sim74	139.703	115.49	123.98	120.304	155.396	145.919	144.813	124.202	134.803	136.118	130.182	132.499	147.845	134.081	119.832	121.622	144.578	162.665	175.833	123.541
SD=15	Sim75	139.813	149.45	120.444	123.391	159.107	144.071	141.337	146.21	134.805	115.061	137.232	121.796	113.064	124.488	145.027	157.328	123.152	144.386	164.318	159.226
SD=15	Sim76	131.313	134.769	172.718	129.32	105.25	138.518	118.966	152.375	117.705	123.179	133.406	128.735	143.732	122.853	95.2072	118.428	113.184	109.204	101.522	140.081
SD=15	Sim77	124.596	126.923	142.366	116.332	139.62	124.383	157.159	138.457	129.149	103.393	116.752	137.164	142.963	138.412	138.655	130.524	126.353	161.209	142.294	107.744
SD=15	Sim78	125.633	135.973	109.622	130.617	132.127	166.348	109.465	129.801	148.466	127.528	119	131.644	148.622	125.576	115.78	156.66	124.74	126.894	120.47	150.422
SD=15	Sim79	122.695	157.619	133.364	107.861	134.377	141.589	112.044	149.27	157.784	149.483	122.655	118.953	134.307	140.964	125.845	164.073	147.781	103.352	131.872	161.062
SD=15	Sim80	132.626	128.491	137.445	155.309	161.193	129.626	109.66	125.29	119.454	96.9633	136.171	132.183	127.735	135.365	152.278	137.103	130.891	116.821	130.558	130.342
SD=15	Sim81	153.511	131.543	117.708	145.559	130.766	145.504	142.965	163.2	145.536	151.964	134.637	137.474	120.01	149.454	116.496	151.977	139.82	139.908	141.41	133.211
SD=15	Sim82	109.234	117.746	128.427	127.758	145.701	153.508	119.189	142.539	157.298	168.406	126.119	163.715	142	133.222	151.111	110.325	115.361	159.914	149.436	127.91
SD=15	Sim83	118.9	147.183	134.43	131.585	121.871	139.387	163.338	138.975	139.58	117.009	130.837	145.514	130.562	152.211	118.72	130.398	133.277	135.132	134.559	143.972
SD=15	Sim84	124.199	94.7031	124.889	132.373	141.184	126.851	104.143	115.764	143.708	126.67	124.562	156.915	106.431	130.008	139.246	148.466	149.736	128.863	119.309	124.359
SD=15	Sim85	132.876	137.457	116.214	116.427	143.719	120.966	128.171	133.006	108.469	139.345	142.567	120.233	146.402	157.975	141.618	149.951	120.241	148.959	135.993	123.597
SD=15	Sim86	126.069	133.01	137.602	134.309	154.371	116.49	121.765	145.233	149.526	99.6893	142.853	166.965	120.391	145.933	138.854	147.336	171.793	138.132	130.124	142.818
SD=15	Sim87	123.756	132.87	142.342	99.5901	147.691	119.747	139.126	134.292	130.988	159.239	134.553	125.4	141.615	125.597	149.765	151.725	133.268	108.379	134.981	120.495
SD=15	Sim88	137.141	134.105	134.303	172.045	132.9	149.131	126.367	153.196	141.553	147.413	148.115	115.677	197.744	161.198	124.942	146.043	145.194	114.476	113.809	144.79
SD=15	Sim89	124.734	144.089	134.21	149.179	157.55	113.476	148.391	109.174	106.435	131.019	133.864	142.899	136.63	130.679	148.642	122.936	116.583	141.868	140.015	117.854
SD=15	Sim90	122.792	120.486	134.845	150.503	150.991	145.259	144.733	144.079	137.5	130.912	134.841	138.805	116.908	145.379	164.207	139.763	144.229	142.462	139.328	131.205
SD=15	Sim91	146.038	146.856	111.392	147.074	121.765	118.29	135.585	122.361	118.297	131.629	131.733	170.403	167	148.237	141.64	142.024	153.083	112.682	129.655	107.412
SD=15	Sim92	149.556	118.568	134.013	130.246	135.569	159.21	145.601	157.098	125.562	146.049	127.365	153.842	111.643	151.629	135.585	151.192	134.968	140.008	130.401	111.387
SD=15	Sim93	132.932	129.245	111.4	148.65	138.932	139.71	146.987	147.707	161.637	140.99	133.808	147.606	102.007	150.977	147.328	124.799	107.279	121.107	143.117	149.604
SD=15	Sim94	105.909	139.758	154.866	110.107	162.211	109.44	131.75	112.509	150.02	127.906	141.971	147.815	132.877	145.14	146.019	133.032	146.513	119.006	147.307	163.757
SD=15	Sim95	127.013	146.395	149.281	145.377	120.441	131.655	135.441	136.948	128.411	108.42	125.258	93.595	126.418	131.657	145.202	122.231	118.705	142.099	131.269	144.908
SD=15	Sim96	147.314	120.763	171.131	130.002	132.687	120.729	128.115	132.309	175.787	130.006	137.959	128.42	151.857	160.883	150.486	112.275	142.428	114.062	120.177	153.162
SD=15	Sim97	114.274	128.037	152.074	132.48	143.381	165.18	145.125	117.936	134.737	146.184	128.574	115.395	129.171	155.287	158.334	156.513	155.137	98.5799	144.447	113.492
SD=15	Sim98	134.776	133.183	143.17	140.403	125.339	131.966	161.069	123.95	133.678	113.209	132.573	132.924	148.896	127.7	150.107	105.128	141.098	131.846	162.876	134.845
SD=15	Sim99	131.349	118.982	133.431	149.424	138.666	124.801	131.432	131.759	141.741	125.036	131.821	122.95	94.1989	141.725	132.958	126.615	146.359	101.739	132.32	130.339
Result	ID	SBP01	SBP02	SBP03	SBP04	SBP05	SBP06	SBP07	SBP08	SBP09	SBP10	SBP11	SBP12	SBP13	SBP14	SBP15	SBP16	SBP17	SBP18	SBP19	SBP20
SD=20	Sim00	109.428	164.418	131.785	129.15	120.542	132.311	144.561	137.463	94.1996	141.763	142.869	159.936	101.934	142.978	149.453	116.355	171.211	121.359	174.037	157.121
SD=20	Sim01	104.641	169.937	109.818	108.331	93.9709	157.875	140.501	112.302	161.905	153.222	112.001	138.672	153.549	133.047	101.337	123.444	176.33	104.017	119.705	102.13
SD=20	Sim02	124.721	148.334	138.695	116.156	130.034	112.677	139.885	146.739	141.623	107.594	115.917	135.502	154.823	118.555	117.782	142.369	147.812	94.5238	114.53	156.103
SD=20	Sim03	117.854	118.79	155.385	169.549	119.105	147.655	153.544	126.343	125.439	109.198	182.764	137.384	137.876	138.55	102.939	154.105	131.943	125.743	104.032	172.793
SD=20	Sim04	140.634	149.215	130.313	129.563	110.83	138.806	111.537	107.71	131.639	155.514	164.848	133.07	125.183	143.876	110.758	100.06	98.1781	150.476	134.219	155.845
SD=20	Sim05	160.536	150.018	137.837	142.565	154.14	151.545	130.654	108.69	186.193	154.629	101.454	166.722	119.811	113.358	180.72	159.922	154.923	149.528	114.065	130.894
SD=20	Sim06	135.566	111.558	137.762	179.244	142.569	162.007	124.797	122.373	133.322	112.281	147.05	152.748	132.143	124.374	122.213	162.035	178.954	120.204	125.701	123.687
SD=20	Sim07	149.59	140.45	172.033	150.222	113.172	151.599	160.134	130.923	109.982	106.678	129.414	141.199	105.72	116.688	111.318	162.845	127.336	146.071	113.251	142.386
SD=20	Sim08	114.044	132.239	131.83	170.034	127.269	128.998	126.514	153.938	100.442	137.663	155.787	143.806	158.381	146.205	130.816	138.007	159.084	158.992	133.474	137.828
SD=20	Sim09	172.436	143.625	148.859	142.709	123.517	142.054	106.068	175.181	155.013	134.975	160.94	116.881	145.748	122.896	123.129	108.078	111.58	100.532	138.136	162.211
SD=20	Sim10	115.012	144.913	143.514	144.428	140.866	144.115	167.526	122.795	142.316	115.53	124.348	127.588	136.096	133.44	151.892	100.358	166.831	141.77	148.511	126.954
SD=20	Sim11	111.733	131.621	143.452	162.166	145.137	125.359	141.076	139.011	141.495	136.706	147.735	108.684	134.751	141.262	147.03	129.791	107.849	145.944	157.629	130.887
SD=20	Sim12	133.324	165.314	143.758	137.403	122.689	113.989	124.332	117.253	111.786	122.472	157.322	141.959	196.981	120.691	151.246	131.137	94.7895	136.978	103.369	140.775
SD=20	Sim13	177.52	164.67	168.153	157.758	141.14	132.138	132.053	163.937	126.368	147.171	136.897	164.983	151.206	157.515	160.7	142.61	133.786	134.538	157.25	98.9454
SD=20	Sim14	101.225	164.53	124.757	135.224	152.397	119.128	158.492	162.624	74.6659	143.165	109.072	80.5101	134.243	155.571	132.164	152.022	138.606	149.962	144.884	142.362
SD=20	Sim15	101.72	148.413	140.762	171.928	94.0701	137.022	134.779	150.46	114.054	161.953	152.459	94.7952	114.644	168.119	123.835	152.095	107.837	157.381	110.557	119.072
SD=20	Sim16	163.607	150.044	127.546	137.853	158.2	151.317	156.593	165.332	120.261	186.254	118.669	119.994	105.443	147.33	133.107	151.83	149.99	118.368	140.786	135.836
SD=20	Sim17	123.745	124.349	142.357	124.575	127.161	114.759	146.096	125.271	98.4064	143.339	160.832	136.597	141.967	153.183	131.321	142.365	156.461	133.7	134.681	121.638
SD=20	Sim18	117.535	128.209	147.689	136.927	128.688	165.259	156.301	144.929	204.504	113.211	199.391	162.241	133.866	106.457	147.783	143.698	99.105	128.513	140.985	114.248
SD=20	Sim19	151.706	161.988	117.096	120.229	128.035	142.192	123.983	115.148	137.388	170.146	153.17	160.706	139.208	155.298	149.381	124.505	140.072	102.093	110.442	114.502
SD=20	Sim20	170.117	173.013	88.8337	125.781	114.106	141.708	123.416	106.955	122.482	100.893	174.179	147.38	127.584	112.532	117.977	81.4524	141.432	125.347	163.873	157.382
SD=20	Sim21	127.943	126.867	144.858	113.637	137.405	157.083	117.9	152.785	133.34	134.197	135.675	128.743	146.268	122.36	172.989	133.008	141.124	103.879	151.898	158.012
SD=20	Sim22	112.174	151.276	122.407	146.117	141.711	139.289	151.397	123.236	178.131	169.408	130.685	108.456	153.944	153.096	140.626	152.524	175.705	146.263	111.22	135.662
SD=20	Sim23	131.425	124.183	134.137	107.737	137.514	138.162	122.631	124.872	188.747	169.559	116.97	118.929	136.347	146.802	161.706	118.662	154.654	113.2	160.872	143.356
SD=20	Sim24	147.826	140.214	140.477	167.688	150.93	141.016	167.197	136.909	149.02	163.119	163.344	167.625	132.088	143.91	144.505	158.09	132.419	128.807	154.382	128.03
SD=20	Sim25	144.625	121.917	144.14	107.12	166.21	108.566	117.915	131.419	144.473	129.817	121.658	129.282	165.215	108.155	137.824	131.712	133.971	68.5033	124.97	121.612
SD=20	Sim26	147.546	162.096	149.532	129.758	147.485	107.137	121.295	158.036	119.275	132.078	120.595	142.08	130.645	189.237	152.586	135.305	113.648	126.586	123.846	136.705
SD=20	Sim27	167.844	146.075	154.483	143.727	139.648	118.728	108.508	111.376	123.901	111.076	116.937	121.957	140.633	118.382	103.889	139.772	134.8	118.957	99.9097	157.08
SD=20	Sim28	120.362	141.723	133.052	124.683	132.68	127.109	146.555	179.105	144.533	154.659	96.3664	118.422	148.159	112.13	120.312	121.805	137.478	114.753	163.846	156.289
SD=20	Sim29	134.055	139.423	132.263	127.143	110.305	151.142	163.051	149.522	146.095	136.071	109.697	147.563	142.981	161.486	130.637	151.161	113.127	124.762	142.837	146.61
SD=20	Sim30	111.069	100.752	116.878	89.3938	161.199	143.845	131.395	129.041	119.879	139.638	144.273	133.359	112.33	126.836	95.5095	117.572	144.57	162.516	103.186	135.088
SD=20	Sim31	128.053	184.593	113.044	126.152	133.155	123.263	141.67	104.608	121.668	135.853	114.221	131.226	144.691	135.157	172.96	137.871	161.382	163.289	141.334	162.217
SD=20	Sim32	153.346	124.919	151.049	129.513	124.746	156.018	146.538	94.0926	135.148	118.082	122.188	152.601	106.002	130.59	138.69	135.019	73.4885	116.069	141.07	125.676
SD=20	Sim33	142.777	166.431	162.943	129.33	162.946	109.713	141.082	141.738	143.518	186.544	154.129	161.399	150.445	145.641	152.686	131.917	141.887	126.393	117.414	113.541
SD=20	Sim34	120.869	151.879	157.801	134.57	121.366	126.396	128.916	139.348	149.61	137.672	96.8915	127.306	185.522	109.769	121.977	147.849	131.275	145.161	142.05	134.09
SD=20	Sim35	124.969	131.466	164.071	127.785	148.062	123.342	129.241	122.75	122.074	144.447	145.688	131.185	129.599	113.937	140.217	108.526	144.583	124.839	103.204	138.5
SD=20	Sim36	107.84	83.2901	144.578	118.04	139.011	135.93	141.624	152.616	157.202	160.317	145.781	132.31	167.965	151.952	149.216	161.193	98.0258	147.593	155.169	160.996
SD=20	Sim37	122.712	121.495	132.495	121.867	157.038	113.777	136.92	137.132	123.34	99.6493	118.835	111.05	151.626	105.551	167.011	143.906	144.06	135.581	164.708	134.263
SD=20	Sim38	110.654	140.982	141.275	133.712	165.299	124.031	120.332	140.697	119.021	132.539	114.778	152.624	119.852	125.117	134.683	169.295	147.147	127.39	119.452	123.657
SD=20	Sim39	145.898	135.984	154.902	134.103	127.347	100.599	121.76	102.3	142.848	116.837	129.611	180.101	123.273	149.802	133.614	126.53	135.024	168.976	126.89	141.423
SD=20	Sim40	147.765	114.46	103.519	162.892	103.355	115.456	102.942	144.006	113.452	93.8491	148.036	143.397	142.997	134.92	152.557	117.147	142.334	131.962	135.913	167.765
SD=20	Sim41	186.454	142.921	138.82	144.029	148.543	138.756	133.586	124.96	123.909	149.454	127.152	105.098	182.457	139.479	137.501	158.107	123.589	142.083	111.455	147.201
SD=20	Sim42	119.44	102.72	134.228	166.605	189.224	114.614	127.457	123.069	144.914	164.577	133.76	125.532	144.904	147.562	148.884	144.951	136.617	126.112	136.659	118.421
SD=20	Sim43	128.999	156.797	145.166	118.6	144.098	128.752	135.968	145.324	157.895	145.117	107.388	133.832	93.8986	126.053	138.288	128.152	119.709	130.81	124.763	156.999
SD=20	Sim44	145.265	142.995	136.349	136.557	127.056	134.129	107.227	167.593	193.533	114.278	158.191	107.893	105.745	134.04	147.374	127.542	147.904	143.439	132.497	147.155
SD=20	Sim45	115.661	122.735	159.133	144.295	113.866	111.806	120.552	144.726	102.814	131.94	124.684	126.519	192.895	132.848	157.932	148.741	153.446	151.437	147.221	131.266
SD=20	Sim46	189.186	117.687	101.927	178.073	135.886	129.13	115.819	164.967	121.633	91.7944	116.695	123.701	157.015	155.479	156.561	134.172	139.57	128.253	118.28	149.613
SD=20	Sim47	113.122	168.908	114.632	177.55	151.628	153.223	149.347	134.069	142.982	94.0426	152.469	106.902	154.096	171.461	99.2611	102.068	117.667	91.2822	171.546	104.937
SD=20	Sim48	159.297	163.847	113.457	115.419	137.004	109.033	150.501	104.839	131.261	103.394	100.941	125.284	99.9031	163.147	135.195	149.289	139.19	169.117	141.255	167.653
SD=20	Sim49	106.271	126.954	135.416	155.539	120.863	172.348	182.253	135.291	145.604	156.573	117.231	152.601	144.947	160.37	102.873	113.297	118.677	108.788	129.096	179.256
SD=20	Sim50	150.553	137.018	163.052	153.115	103.045	170.398	159.922	166.599	116.492	128.013	121.369	187.179	115.367	152.604	121.905	132.41	114.946	151.045	106.059	149.746
SD=20	Sim51	106.643	169.319	112.082	161.735	112.742	97.1523	124.084	113.182	119.235	154.61	111.103	133.332	131.722	170.36	120.116	125.647	132.512	130.124	134.827	119.703
SD=20	Sim52	127.392	108.245	196.962	119.057	155.566	146.815	131.595	161.684	142.705	147.219	122.001	139.204	140.488	169.943	165.954	165.819	133.681	125.93	131.314	134.975
SD=20	Sim53	144.878	120.951	144.153	137.131	124.221	143.968	118.652	127.871	153.201	135.889	145.243	101.56	143.308	150.038	97.1206	157.12	154.84	142.141	185.039	165.7
SD=20	Sim54	137.471	123.757	163.354	132.97	127.522	134.063	152.986	137.477	154.825	110.667	118.966	170.31	140.456	102.355	138.52	127.016	136.714	139.49	164.34	110.542
SD=20	Sim55	114.289	139.782	169.742	132.076	136.062	144.714	103.393	118.916	150.562	121.767	132.161	156.452	113.743	127.914	128.794	142.296	125.896	126.228	138.372	142.615
SD=20	Sim56	104.778	130.501	168.866	143.891	89.8373	118.824	108.26	164.474	148.89	152.895	131.952	154.477	136.73	119	151.467	161.837	128.861	171.996	141.307	125.655
SD=20	Sim57	131.695	114.446	136.123	120.596	124.313	136.326	161.116	108.455	186.626	151.16	144.327	104.15	146.287	136.193	147.046	147.255	114.709	128.607	136.918	127.951
SD=20	Sim58	169.182	144.134	172.442	156.896	118.483	165.396	170.567	130.268	168.901	143.408	138.597	129.328	149.739	123.795	167.413	124.686	134.625	149.528	168.312	119.783
SD=20	Sim59	134.713	108.732	163.397	150.1	136.945	173.872	123.051	121.008	146.106	147.624	130.061	162.465	136.72	163.039	108.276	133.441	164.105	167.831	163.976	115.547
SD=20	Sim60	144.813	99.5242	162.885	97.7526	129.599	147.269	127.418	125.476	130.919	114.635	149.412	125.41	146.247	89.8453	125.13	128.152	87.967	150.791	159.387	127.722
SD=20	Sim61	140.106	148.509	174.305	130.075	136.504	125.969	138.665	147.384	130.471	149.348	124.09	108.076	123.224	110.178	155.058	140.109	116.754	134.5	131.162	107.357
SD=20	Sim62	130.416	104.363	89.8996	132.515	152.514	116.487	136.705	132.877	130.477	130.49	127.866	158.702	153.897	125.852	117.61	146.693	113.088	143.406	161.78	126.368
SD=20	Sim63	138.846	103.211	134.073	172.738	157.182	103.798	128.87	116.152	131.345	166.565	129.526	177.39	156.665	151.907	128.77	129.629	133.724	135.02	134.558	151.348
SD=20	Sim64	123.097	125.365	132.698	144.048	82.1038	163.238	137.868	165.05	155.463	110.987	141.065	110.904	111.957	140.331	125.39	113.102	151.312	116.817	182.661	140.756
SD=20	Sim65	145	125.626	151.15	122.582	132.834	122.654	96.8582	120.249	116.873	143.04	167.822	128.181	114.608	145.623	135.389	126.641	114.87	130.497	154.256	137.486
SD=20	Sim66	177.669	102.052	125.815	151.975	107.631	128.563	133.314	118.427	128.858	133.564	183.325	117.151	113.134	111.297	144.946	126.301	117.302	145.452	157.02	130.414
SD=20	Sim67	109.538	138.176	106.199	115.123	125.491	144.721	118.818	103.736	143.329	135.307	143.89	112.432	150.254	159.213	161.103	115.88	83.0461	130.816	142.341	157.588
SD=20	Sim68	134.164	142.627	178.526	133.43	152.602	152.025	156.356	118.139	114.508	145.943	129.428	141.052	133.569	141.635	126.989	153.076	133.026	135.088	127.923	124.494
SD=20	Sim69	128.38	135.127	119.676	107.023	163.172	122.058	157.965	158.839	129.173	152.238	133.592	117.6	97.7636	156.137	139.894	143.568	155.024	136.437	108.43	142.844
SD=20	Sim70	126.191	149.843	148.073	115.622	136.43	145.015	128.106	148.946	143.258	144.025	120.935	133.323	125.16	129.637	135.23	110.476	125.111	127.391	126.191	163.141
SD=20	Sim71	121.539	106.139	128.244	124.671	134.73	87.9821	163.073	109.025	162.172	138.358	129.099	149.574	120.337	127.757	135.298	108.708	111.759	125.153	94.9645	158.571
SD=20	Sim72	120.013	146.581	151.472	119.512	153.418	96.1536	135.615	122.35	148.22	122.48	123.65	126.215	159.358	139.926	113.701	150.869	81.9773	142.489	131.847	102.53
SD=20	Sim73	120.766	108.147	138.372	192.306	140.143	134.673	91.2285	121.355	160.997	148.14	117.379	143.054	137.381	151.187	123.408	144.846	164.346	138.206	128.386	121.644
SD=20	Sim74	144.175	123.298	153.729	154.061	173.625	109.655	121.866	126.945	127.994	155.498	132.096	151.168	152.472	133.754	120.331	125.628	169.363	145.613	158.551	128.473
SD=20	Sim75	119.535	130.547	122.516	115.97	132.348	132.517	145.715	161.237	125.629	152.364	151.431	134.234	145.461	137.618	139.985	122.306	173.686	114.426	175.189	107.534
SD=20	Sim76	116.121	118.459	113.162	132.829	130.483	136.42	132.874	151.465	127.615	181.612	113.469	141.268	121.852	140.254	133.534	125.017	158.376	143.241	124.513	111.997
SD=20	Sim77	132.836	157.087	118.811	127.828	107.845	135.565	151.853	122.418	168.759	139.99	136.416	131.741	113.617	138.096	138.77	128.06	112.793	120.858	135.202	151.465
SD=20	Sim78	134.838	144.469	153.513	144.612	104.729	136.026	161.17	149.742	164.751	163.384	136.052	171.67	161.216	115.791	132.863	141.925	119.538	146.733	142.891	163.968
SD=20	Sim79	134.528	164.304	97.5482	119.597	120.079	131.042	120.749	154.995	151.015	138.663	106.2	112.79	134.386	116.637	131.076	126.866	161.82	108.467	126.977	162.709
SD=20	Sim80	119.415	130.632	89.9134	142.079	127.194	124.6	117.424	105.374	134.982	113.171	164.662	145.561	170.874	154.209	134.178	120.678	146.545	152.881	107.52	170.106
SD=20	Sim81	151.431	158.424	109.118	170.155	122.275	139.911	154.869	161.693	140.565	128.406	82.8439	122.849	134.415	143.78	109.209	160.071	163.281	153.815	150.923	138.743
SD=20	Sim82	162.202	129.514	131.548	156.196	154.984	118.081	95.9132	141.864	143.863	138.256	111.61	151.506	129.756	170.403	97.1993	115.027	138.872	121.06	133.347	126.453
SD=20	Sim83	113.079	121.128	112.185	135.3	116.126	164.709	139.534	162.043	143.895	131.509	123.043	126.108	123.394	134.211	129.414	125.905	138.848	160.213	144.253	132.292
SD=20	Sim84	136.091	129.2	85.6798	168.667	108.128	178.182	117.182	112.985	126.979	129.532	108.701	108.029	108.355	168.726	143.99	110.631	121.58	135.668	129.855	98.3264
SD=20	Sim85	117.756	118.525	160.039	150.625	136.703	128.909	103.705	135.923	130.675	123.246	151.668	101.84	117.973	146.303	123.917	161.506	173.707	154.258	161.949	134.974
SD=20	Sim86	161.053	129.18	148.068	108.734	153.46	124.503	109.054	133.697	123.568	170.217	151.625	128.27	140.438	120.801	140.002	121.99	132.321	157.348	138.904	113.502
SD=20	Sim87	156.68	134.82	146.791	117.411	124.071	182.007	165.743	132.297	151.501	141.367	155.758	174.549	121.568	126.412	145.754	123.202	132.315	128.724	134.323	126.819
SD=20	Sim88	159.867	169.296	131.937	113.39	127.425	135.164	110.317	161.213	112.758	146.45	112.93	130.619	145.772	157.06	149.601	144.485	144.19	131.003	129.113	135.145
SD=20	Sim89	123.701	145.888	137.569	108.319	111.811	103.607	145.155	106.291	119.711	132.497	170.183	91.5868	106.171	139.213	134.81	135.265	148.894	159.521	124.81	158.738
SD=20	Sim90	115.209	165.362	123.138	142.641	131.834	135.516	134.211	140.467	118.648	149.11	169.571	150.387	143.446	135.076	93.7266	115.464	125.189	117.776	156.604	172.332
SD=20	Sim91	103.987	88.202	128.171	122.947	143.064	166.096	127.22	160.832	139.049	137.757	140.708	127.803	119.579	108.323	131.513	143.338	115.294	122.447	127.74	135.613
SD=20	Sim92	161.847	123.588	121.762	141.021	125.242	132.964	108.816	138.887	129.641	142.75	124.877	150.698	133.394	161.057	122.837	159.793	97.3991	148.666	84.5294	136.18
SD=20	Sim93	143.383	109.52	105.89	172.348	169.211	127.979	159.709	124.863	144.942	122.268	99.9619	136.432	84.7348	142.958	136.356	111.215	185.353	143.364	161.023	128.912
SD=20	Sim94	177.312	114.798	116.425	179.524	168.641	155.698	173.172	143.047	113.748	127.328	114.226	134.893	141.74	150.01	131.853	137.169	150.64	121.011	92.8725	78.8542
SD=20	Sim95	161.455	154.597	123.435	147.706	143.31	143.949	156.423	131.115	180.415	125.011	166.845	127.719	139.847	145.739	127.92	141.127	154.546	149.398	154.096	100.571
SD=20	Sim96	104.214	129.738	108.42	135.903	167.788	129.973	145.865	130.586	74.4607	150.229	140.632	105.064	129.6	114.718	144.952	130.433	152.115	115.993	122.851	122.757
SD=20	Sim97	137.179	119.864	174.238	142.213	113.107	126.372	152.603	127.199	130.194	121.978	110.609	134.297	146.645	110.818	153.688	161.799	143.289	147.301	117.572	150.823
SD=20	Sim98	121.463	162.895	106.43	131.392	99.7003	140.496	118.243	167.927	166.938	176.96	108.134	177.061	126.012	133.391	127.654	142.333	127.614	134.264	140.41	132.487
SD=20	Sim99	126.137	137.546	148.849	115.788	171.049	126.725	160.617	106.525	119.605	137.491	135.861	110.621	76.8713	153.124	101.342	148.118	148.358	136.596	161.316	113.977

## Sheet: SBP_K24
Result	ID	SBP01	SBP02	SBP03	SBP04	SBP05	SBP06	SBP07	SBP08	SBP09	SBP10	SBP11	SBP12	SBP13	SBP14	SBP15	SBP16	SBP17	SBP18	SBP19	SBP20	SBP21	SBP22	SBP23	SBP24
SD=5	Sim00	139.816	139.281	133.387	142.869	129.953	133.13	130.625	124.254	136.747	133.125	138.004	127.424	133.208	128.392	134.563	135.589	131.309	127.867	129.435	125.618	137.179	130.744	128.77	144.709
SD=5	Sim01	123.787	134.297	124.144	135.325	133.035	133.279	137.561	132.482	133.12	126.443	127.967	131.428	124.143	131.441	132.698	131.45	141.909	131.483	133.623	117.747	135.011	134.44	130.97	123.336
SD=5	Sim02	125.542	141.886	133.407	130.062	125.829	131.186	139.506	135.702	131.672	138.727	138.714	131.654	130.325	138.162	129.947	136.256	133.579	134.865	131.483	135.09	143.537	127.917	123.681	144.158
SD=5	Sim03	132.458	144.659	132.588	137.73	140.373	135.71	129.208	138.365	137.421	130.908	134.014	130.454	133.38	134.958	139.934	135.345	133.361	146.605	134.204	132.16	144.132	138.213	136.905	134.663
SD=5	Sim04	129.158	137.402	121.248	125.081	131.953	127.758	134.981	139.207	133.924	132.747	132.038	134.023	133.041	128.593	133.871	127.415	127.968	134.05	132.287	132.82	135.498	131.237	132.666	138.881
SD=5	Sim05	132.913	133.538	140.42	138.755	119.42	132.26	136.004	129.239	140.123	137.616	141.119	138.257	139.333	134.176	139.474	135.206	132.993	138.929	133.872	140.183	132.472	131.397	144.209	134.43
SD=5	Sim06	138.054	142.125	138.645	135.348	136.008	140.682	134.651	131.315	137.297	142.652	135.658	143.027	148.012	130.409	141.762	136.681	137.827	141.474	144.279	141.519	140.263	139.964	137.853	131.895
SD=5	Sim07	131.854	137.601	144.72	132.496	126.476	142.772	131.592	127.872	136.172	135.489	130.515	138.668	137.951	130.617	135.437	124.974	134.49	137.817	133.568	130.035	130.367	129.541	130.619	133.945
SD=5	Sim08	131.533	133.271	136.432	142.21	136.915	138.599	141.729	127.307	146.405	135.094	135.181	125.058	134.514	133.746	125.07	132.423	140.275	139.486	137.34	131.338	132.386	142.374	133.444	138.134
SD=5	Sim09	134.449	139.245	125.481	119.542	142.202	132.242	134.967	129.211	129.674	131.468	130.023	122.63	126.447	125.386	123.173	125.18	128.686	123.173	140.221	129.312	133.895	131.946	130.31	133.894
SD=5	Sim10	132.237	138.794	134.854	137.25	145.204	137.828	131.816	137.788	138.4	137.478	145.06	148.601	137.554	138.279	128.042	132.628	130.545	135.678	134.147	139.614	133.474	149.497	139.724	131.469
SD=5	Sim11	146.403	137.859	130.615	139.43	138.66	130.489	131.314	134.367	140.349	134.451	137.355	130.894	134.6	139.329	139.539	136.532	130.09	135.693	140.435	128.897	139.796	135.727	128.876	138.36
SD=5	Sim12	139.083	128.136	127.782	131.973	137.043	135.682	135.265	134.681	148.932	134.113	133.016	129.747	131.881	139.656	132.131	131.586	148.554	132.269	138.838	143.887	137.306	134.799	142.122	141.714
SD=5	Sim13	140.889	127.193	134.243	131.65	137.362	140.523	143.666	137.263	140.597	139.098	127.624	142.479	141.554	136.136	130.529	131.425	129.062	139.057	134.675	131.768	132.183	129.848	133.882	136.804
SD=5	Sim14	136.235	136.093	139.469	141.043	135.552	132.862	141.684	134.643	142.167	144.925	143.624	135.818	135.08	138.508	130.361	148.463	136.338	143.393	136.128	141.661	143.451	141.161	142.504	140.999
SD=5	Sim15	128.094	129.687	129.598	128.313	130.054	118.973	128.328	133.809	130.121	131.141	133.376	134.595	137.258	142.915	133.135	129.087	137.017	134.967	126.869	131.362	125.632	133.204	135.139	133.286
SD=5	Sim16	129.433	137.445	136.533	125.821	134.188	138.773	137.897	130.121	128.399	133.819	138.265	138.598	135.859	138.561	137.89	147.941	132.099	141.548	130.534	138.604	138.197	131.433	136.846	137.457
SD=5	Sim17	132.448	132.797	128.8	131.897	130.775	135.465	126.462	123.45	131.867	128.841	131.54	128.882	133.168	132.217	138.602	127.566	134.834	127.276	140.246	122.987	140.092	128.412	131.245	132.469
SD=5	Sim18	133.772	143.344	138.056	138.098	146.842	139.082	141.468	143.928	138.013	139.7	146.307	141.011	144.862	140.329	140.364	146.332	144.864	131.871	144.618	138.751	136.889	138.35	138.694	133.964
SD=5	Sim19	137.463	126.438	129.29	137.68	122.525	137.245	135.709	135.828	135.823	131.793	131.246	138.056	132.149	134.104	131.816	140.404	138.291	134.604	135.421	130.877	134.151	134.187	127.327	139.431
SD=5	Sim20	140.03	137.486	128.172	132.063	128.797	126.961	131.397	126.376	131.878	124.969	128.764	123.002	132.662	131.508	131.718	128.728	139.641	134.073	133.633	129.666	135.364	136.588	134.488	133.435
SD=5	Sim21	143.853	138.579	136.784	136.978	142.202	136.831	143.648	136.95	137.494	143.302	143.195	138.891	144.405	127.794	136.851	126.953	138.676	134.687	124.965	138.492	140.926	131.265	132.413	143.592
SD=5	Sim22	143.051	126.588	145.801	139.007	140.134	143.561	133.999	143.345	143.351	138.809	139.08	141.779	149.378	142.062	132.524	141.545	145.671	138.356	143.104	139.826	136.714	141.016	141.27	150.318
SD=5	Sim23	144.316	138.761	137.853	138.958	134.919	143.308	140.687	134.859	138.45	136.652	136.351	148.054	140.393	143.042	137.271	137.054	140.303	139.119	130.258	145.944	138.109	141.229	139.196	149.94
SD=5	Sim24	136.602	136.969	139.015	135.908	134.85	126.592	140.341	140.545	144.171	130.319	145.448	133.774	144.559	137.287	132.15	133.805	132.418	130.37	135.961	135.781	146.929	138.709	139.663	137.72
SD=5	Sim25	129.972	131.799	138.124	129.752	126.488	134.269	133.104	130.207	139.227	131.606	128.549	134.043	131.787	127.978	131.062	131.661	135.142	134.975	130.217	138.13	129.282	129.914	131.418	133.598
SD=5	Sim26	134.264	139.491	133.869	139.891	132.617	133.395	138.724	148.003	131.6	123.541	134.224	139.196	137.109	133.806	135.132	139.656	133.017	141.776	141.726	143.51	141.185	135.406	136.866	134.618
SD=5	Sim27	129.202	133.258	135.894	126.506	127.387	121.873	119.343	138.033	131.304	130.071	133.056	132.471	135.878	131.295	134.475	126.815	121.168	138.288	138.761	136.68	131.024	138.401	125.656	124.657
SD=5	Sim28	139.015	136.037	135.747	143.532	129.096	141.061	133.126	132.409	138.512	134.692	136.624	139.818	143.974	146.976	126.606	138.634	132.373	139.479	139.747	138.084	141.292	139.812	135.289	133.58
SD=5	Sim29	125.751	133.121	140.968	137.226	135.161	134.192	143.383	144.96	150.145	144.268	130.489	130.395	137.216	131.331	131.415	133.998	136.652	139.659	140.998	139.98	137.394	126.998	142.329	139.083
SD=5	Sim30	129.549	133.309	122.572	122.958	129.622	124.24	131.618	133.953	134.84	131.932	125.955	132.473	124.92	125.036	131.955	125.641	128.982	129.377	133.719	130.642	142.129	125.763	140.399	129.485
SD=5	Sim31	135.092	131.596	140.34	130.493	141.335	140.939	131.532	141.224	130.883	136.741	131.367	134.966	138.127	138.655	132.668	132.609	136.037	127.559	137.194	146.291	131.066	137.276	134.643	130.533
SD=5	Sim32	128.878	126.365	129.459	129.142	131.38	126.414	138.551	127.321	128.878	132.581	130.193	132.284	126.199	137.493	125.546	132.879	128.71	138.162	129.17	118.986	127.467	125.701	135.39	133.97
SD=5	Sim33	138.864	153.418	138.939	143.264	133.267	137.863	145.707	134.211	141.543	146.075	135.861	144.812	143.322	132.647	136.842	132.139	136.652	136.481	133.459	135.314	138.2	125.903	134.08	135.988
SD=5	Sim34	132.753	130.891	126.81	126.496	127.776	135.777	132.645	139.775	130.032	132.971	133.196	140.955	140.239	121.861	140.302	135.369	138.083	133.13	129.247	131.515	138.26	137.717	127.94	133.713
SD=5	Sim35	127.919	136.038	123.562	133.927	135.281	138.817	132.144	138.199	133.67	131.113	139.582	132.664	135.005	123.839	137.764	136.118	130.679	129.629	135.8	132.867	135.302	123.249	138.256	128.028
SD=5	Sim36	136.501	135.117	133.779	145.383	138.792	129.775	133.106	139.337	139.09	141.646	138.443	137.315	138.548	139.072	137.809	129.72	134.554	134.297	134.4	143.628	136.323	142.292	145.864	133.262
SD=5	Sim37	131.5	134.638	137.421	131.693	134.714	124.994	133.536	127.015	132.505	133.553	134.729	135.164	135.324	129.376	122.858	123.602	131.902	126.777	141.722	117.055	131.796	131.194	127.946	137.099
SD=5	Sim38	132.776	134.485	141.819	141.238	135.371	127.972	136.237	139.136	133.023	124.75	132.833	139.817	135.388	133.109	131.696	132.459	135.282	131.917	138.939	138.09	129.731	146.585	134.144	136.99
SD=5	Sim39	134.05	133.586	130.932	114.622	132.158	124.993	132.963	136.586	139.055	130.615	127.403	135.296	127.982	138.317	121.552	134.041	131.18	137.94	134.588	129.045	128.009	125.345	135.624	132.161
SD=5	Sim40	131.647	136.588	134.021	134.929	144.069	135.228	136.685	137.089	135.661	132.994	131.25	136.47	140.288	126.244	148.343	132.728	137.193	136.69	132.835	144.264	130.624	137.498	146.731	136.044
SD=5	Sim41	139.485	125.795	151.681	143.85	140.912	145.164	139.593	130.996	138.208	137.783	137.86	137.966	134.868	136.414	141	144.104	139.775	140.737	131.207	145.045	137.385	130.623	138.209	142.87
SD=5	Sim42	138.629	136.949	133.014	141.697	141.415	131.761	139.74	135.999	127.295	123.707	136.447	130.158	128.62	129.428	125.14	123.753	134.81	131.994	127.666	130.842	143.886	121.088	138.174	137.13
SD=5	Sim43	141.173	132.877	139.353	133.531	136.306	134.88	138.745	139.953	137.193	135.951	131.53	139.903	132.69	146.156	135.131	133.897	143.642	128.688	136.306	132.841	131.53	140.048	131.907	145.816
SD=5	Sim44	139.076	133.97	142.013	129.012	133.525	135.192	130.587	139.931	141.17	145.132	137.404	132.851	134.681	134.111	134.275	142.212	144.171	131.397	128.748	135.726	140.203	144.459	132.607	140.16
SD=5	Sim45	142.899	135	134.001	138.293	134.526	140.96	138.541	143.927	137.601	141.326	139.223	143.075	135.894	144.575	130.249	129.647	142.413	145.225	133.497	141.274	140.969	141.064	136.074	139.615
SD=5	Sim46	136.863	133.618	142.845	137.462	138.228	132.334	144.192	149.358	121.625	137.725	144.681	133.369	139.8	148.13	139.431	136.909	137.67	135.105	134.787	133.722	139.046	142.456	140.328	136.144
SD=5	Sim47	126.388	136.509	124.633	130.106	129.744	124.259	132.953	131.86	133.52	131.86	124.995	126.792	125.66	133.711	133.025	137.217	126.774	130.295	141.387	129.418	134.394	127.191	128.964	136.951
SD=5	Sim48	134.82	133.937	140.361	133.999	138.868	128.824	138.426	133.055	132.215	131.062	133.233	138.878	127.544	140.302	122.764	130.81	128.705	130.168	126.501	138.644	128.977	139.693	129.81	135.474
SD=5	Sim49	135.389	135.3	130.054	134.026	133.196	134.342	138.386	138.717	137.954	144.705	131.682	131.173	142.255	134.743	132.968	133.477	140.476	138.937	137.973	128.39	132.493	129.641	139.564	135.943
SD=5	Sim50	142.21	142.324	139.53	130.381	140.394	146.309	136.449	140.894	139.281	138.626	134.441	143.258	138.674	138.255	137.561	141.22	147.29	132.639	140.471	133.078	138.488	136.088	136.188	135.016
SD=5	Sim51	133.386	128.206	124.855	133.235	131.365	134.334	126.312	142.282	127.365	122.64	140.181	136.53	128.189	135.029	128.32	140.813	131.102	141.097	131.615	126.859	129.393	133.32	126.731	141.782
SD=5	Sim52	136.146	131.712	135.98	137.569	138.26	136.69	134.415	130.722	136.637	129.154	131.665	136.093	138.741	138.586	136.78	138.84	138.573	141.559	136.377	133.327	131.091	132.422	129.132	135.324
SD=5	Sim53	137.07	146.558	140.225	138.2	130.96	133.032	138.751	130.554	131.904	137.496	136.224	146.019	136.19	131.01	133.106	122.627	140.894	140.363	137.658	143.112	122.535	140.667	140.321	145.12
SD=5	Sim54	128.654	140.244	133.754	149.17	134.645	139.416	143.176	141.734	134.363	134.623	137.582	128.126	139.901	146.402	137.152	140.761	130.288	128.661	134.215	143.164	142.277	133.811	144.4	138.345
SD=5	Sim55	134.474	137.264	125.474	125.547	133.153	133.694	133.531	127.089	133.542	136.802	132.571	124.912	121.345	138.765	127.445	134.373	133.29	129.037	135.902	132.792	121.709	129.636	141.546	135.952
SD=5	Sim56	136.26	135.256	128.955	133.632	133.364	129.876	130.664	131.884	131.474	127.727	132.267	138.52	131.636	141.172	133.401	132.189	134.39	136.564	123.381	125.99	124.63	125.901	134.108	129.272
SD=5	Sim57	119.801	131.49	124.738	130.757	141.087	131.453	131.898	127.956	129.531	127.932	130.966	131.52	124.309	126.325	132.47	119.889	130.959	124.705	127.756	141.466	135.048	126.268	134.569	136.565
SD=5	Sim58	136.52	139.939	139.801	131.836	134.99	128.934	135.894	132.982	129.068	137.497	141.347	143.387	139.875	141.081	133.147	141.819	137.436	142.549	135.769	138.05	146.456	131.685	132.121	139.847
SD=5	Sim59	136.098	139.445	139.424	145.657	141.801	142.273	138.087	138.349	141.974	140.685	125.704	137.138	139.049	139.387	137.116	140.753	136.948	136.58	144.086	149.197	138.052	134.827	134.874	140.461
SD=5	Sim60	138.13	136.755	135.07	133.054	135.698	135.926	135.682	128.767	129.046	134.149	131.691	132.7	134.715	134.421	133.807	127.889	123.93	136.086	127.018	120.242	128.586	133.946	138.401	127.096
SD=5	Sim61	130.729	124.045	140.235	128.726	130.357	131.047	131.831	136.588	135.111	136.03	139.97	127.971	134.908	136.09	137.459	140.482	147.142	138.068	136.988	132.262	132.847	135.954	118.693	128.047
SD=5	Sim62	132.564	144.436	128.553	136.962	128.911	137.167	137.754	132.372	130.647	134.627	136.209	139.695	128.704	141.105	140.607	137.171	135.16	135.671	129.49	128.845	128.114	140.167	130.663	138.42
SD=5	Sim63	138.678	127.617	130.769	125.634	135.646	132.175	125.529	129.73	127.493	122.859	131.889	138.077	136.106	135.111	128.118	126.842	143.196	129.798	133.875	134.235	128.532	124.195	132.992	136.556
SD=5	Sim64	135.191	133.821	128.28	126.108	128.102	123.738	139.296	135.791	135.913	134.699	129.365	130.784	136.824	136.002	132.668	125.414	134.117	129.97	122.461	135.145	143.14	134.841	128.231	141.631
SD=5	Sim65	132.324	133.045	124.853	135.577	139.582	130.961	133.793	140.455	138.756	131.293	127.564	126.646	130.231	130.792	130.772	134.468	128.571	135.929	129.762	132.996	133.11	133.095	128.484	127.781
SD=5	Sim66	131.315	144.406	136.685	129.874	139.439	138.123	138.207	127.686	137.385	140.803	139.939	136.448	132.914	147.169	142.959	133.671	135.902	144.69	143	137.955	139.523	129.59	138.374	142.527
SD=5	Sim67	136.761	132.54	133.13	128.112	135.209	132.415	131.941	132.776	132.977	133.238	136.364	131.362	121.81	127.314	133.921	134.318	129.726	129.835	126.626	127.505	141.807	136.521	136.317	129.966
SD=5	Sim68	141.41	141.212	142.562	137.739	133.081	129.428	130.924	135.463	143.326	139.948	139.563	137.359	132.908	131.572	142.275	136.872	131.801	135.851	135.409	133.324	133.349	135.736	134.78	130.587
SD=5	Sim69	125.182	130.113	126.884	136.906	132.43	137.495	125.902	135.785	132.939	138.338	135.73	143.833	129.657	128.823	136.001	138.14	135.417	130.088	133.716	128.733	134.421	133.318	144.412	131.709
SD=5	Sim70	129.374	132.345	132.419	133.344	126.777	132.255	128.478	143.39	142.053	129.169	135.455	135.922	133.402	119.255	136.005	129.724	131.608	125.7	139.988	129.618	133.023	131.91	137.341	132.552
SD=5	Sim71	141.88	145.888	133.001	126.713	132.46	142.466	139.383	133.791	133.801	137.307	133.954	134.823	140.493	143.493	129.564	138.663	121.461	136.487	126.923	132.705	141.011	129.375	135.689	132.78
SD=5	Sim72	140.111	134.579	140.404	140.028	136.405	135.931	141.286	143.25	142.399	139.976	139.51	143.727	149.606	138.272	142.301	132.998	143.525	141.582	149.517	131.407	132.527	135.187	134.502	137.705
SD=5	Sim73	134.454	133.808	137.056	136.998	128.565	137.622	132.718	131.558	132.17	139.176	136.114	138.045	135.467	136.97	137.808	140.983	141.502	135.719	126.238	147.283	137.583	131.431	128.472	130.073
SD=5	Sim74	134.709	136.603	133.295	131.249	139.103	133.568	133.378	142.624	139.859	138.794	137.081	134.219	140.537	130.804	131.759	136.923	134.242	129.408	148.985	145.106	140.469	143.746	129.863	135.859
SD=5	Sim75	133.603	137.758	135.622	135.025	136.779	129.782	127.311	138.326	132.182	129.818	140.08	139.998	129.114	140.71	135.815	124.441	133.159	137.952	134.093	136.452	141.373	130.295	137.141	149.858
SD=5	Sim76	136.396	129.058	121.455	140.259	124.394	132.461	133.133	125.335	127.972	126.788	136.791	132.665	131.106	135.677	127.936	130.629	126.296	130.717	130.451	132.278	126.383	133.95	127.874	126.815
SD=5	Sim77	134.714	132.123	138.121	137.977	139.469	131.149	125.75	135.995	130.699	130.2	134.173	138.135	130.795	133.645	137.855	129.729	137.089	128.402	130.418	137.094	132.091	135.467	138.656	140.113
SD=5	Sim78	143.398	138.571	140.622	136.764	138.268	134.458	140.45	144.19	135.845	130.507	134.555	140.638	142.761	140.282	145.185	142.016	137.435	141.114	135.512	135	143.246	139.658	138.362	136.837
SD=5	Sim79	131.388	127.31	147.318	140.124	125.015	133.256	131.615	139.686	129.574	131.126	128.652	135.189	128.384	132.646	141.729	137.451	133.2	126.689	130.907	140.092	133.607	135.296	141.928	144.144
SD=5	Sim80	126.903	125.784	131.755	127.646	136.045	133.881	122.547	125.113	124.503	132.128	126.776	127.797	128.286	135.195	120.89	136.998	122.04	131.359	130.253	135.865	130.378	122.577	127.319	123.314
SD=5	Sim81	133.648	142.252	143.927	147.662	144.282	132.337	135.753	130.845	142.698	128.653	134.863	142.86	145.125	137.611	129.372	133.6	139.274	134.476	141.643	140.798	137.202	141.538	132.866	143.103
SD=5	Sim82	137.757	139.303	132.908	147.732	148.917	138.778	133.575	140.327	144.538	144.9	133.613	133.912	129.23	135.37	136.411	133.183	130.329	123.704	131.798	140.284	141.435	134.659	129.123	133.554
SD=5	Sim83	124.285	134.918	120.621	134.19	139.138	121.124	130.715	132.711	131.055	136.056	133.161	126.14	139.995	134.772	135.039	128.843	139.302	130.696	134.753	129.061	132.041	121.453	135.131	134.133
SD=5	Sim84	138.439	132.144	141.173	124.33	137.288	135.361	126.769	124.779	135.077	126.634	125.179	138.412	129.982	135.329	144.481	122.832	138.416	125.81	127.964	129.414	130.495	139.982	137.076	125.059
SD=5	Sim85	134.056	135.573	138.116	129.119	129.094	128.175	139.557	128.882	128.156	134.461	140.474	131.844	138.649	142.515	131.961	137.159	140.816	129.163	138.432	132.64	134.424	136.323	141.366	137.622
SD=5	Sim86	131.842	139.817	140.284	129.943	138.77	129.428	124.231	137.867	136.048	134.51	136.218	132.395	135.719	131.947	133.088	136.121	137.985	146.587	148.976	128.306	135.975	128.832	125.275	136.357
SD=5	Sim87	139.723	132.998	136.708	136.559	136.482	142.85	136.937	144.727	134.009	145.374	131.399	144.928	128.324	137.29	138.521	133.316	134.138	137.047	132.567	155.008	137.308	137.574	136.095	135.031
SD=5	Sim88	145.849	145.796	146.808	148.15	134.097	141.12	137.378	133.804	151.043	144.322	128.892	142.379	136.688	140.419	138.441	137.689	132.399	135.166	128.13	147.391	132.449	140.845	131.049	137.137
SD=5	Sim89	132.501	137.15	127.518	130.559	132.342	125.608	121.591	131.218	123.395	129.228	137.284	131.625	132.415	129.29	128.447	127.341	128.619	122.955	123.599	128.969	122.289	133.697	128.032	134.794
SD=5	Sim90	142.923	147.864	136.017	131.788	137.68	147.25	136.446	138.639	128.159	134.9	130.551	131.49	139.055	142.264	136.615	148.798	149.198	144.395	135.567	134.671	138.045	133.859	135.07	139.312
SD=5	Sim91	123.839	131.055	133.044	135.37	132.95	135.493	143.534	127.871	136.66	131.868	131.584	125.964	127.163	136.456	136.328	133.605	129.113	134.177	130.986	129.435	134.937	145.176	138.089	130.2
SD=5	Sim92	126.964	123.883	126.623	126.17	140.288	124.159	132.188	132.844	135.338	134.619	123.827	130.254	132.726	125.704	130.352	134.197	125.378	127.142	131.151	120.847	128.11	131.796	128.389	132.853
SD=5	Sim93	135.379	136.986	134.227	124.231	129.578	134.327	133.744	131.319	132.599	130.334	131.231	128.83	144.287	126.739	137.599	138.002	142.148	133.977	133.466	115.313	137.812	135.287	135.079	141.407
SD=5	Sim94	146.576	131.784	133.509	137.921	132.572	133.47	143.641	136.35	141.076	141.254	130.655	142.214	136.177	140.104	138.94	147.831	140.195	137.413	132.798	136.005	134.741	144.219	135.23	134.642
SD=5	Sim95	133.292	137.432	142.785	121.803	127.85	128.331	136.414	123.326	130.074	143.796	126.372	127.737	142.418	132.934	136.61	137.98	137.361	136.065	126.889	125.771	130.254	125.735	129.073	132.4
SD=5	Sim96	144.939	133.759	140.555	129.692	135.824	137.08	131.162	135.895	134.602	133.726	127.576	130.356	135.328	135.794	130.231	138.026	130.787	139.963	130.129	128.297	129.406	126.343	143.524	138.409
SD=5	Sim97	137.319	134.441	128.01	125.511	127.699	134.913	132.639	137.248	136.82	128.499	134.843	136.444	121.114	133.272	125.914	127.982	125.487	122.197	128.635	134.705	134.273	135.737	130.043	126.085
SD=5	Sim98	129.411	137.493	134.049	139.679	138.576	139.184	144.479	135.357	129.324	139.229	133.162	138.137	128.164	137.744	131.315	139.15	145.787	137.605	130.472	142.594	137.463	132.907	145.612	139.46
SD=5	Sim99	124.919	129.543	135.516	128.179	136.671	131.348	138.152	134.678	127.303	135.791	130.416	137.762	134.175	134.198	123.553	141.792	132.865	134.736	129.634	129.344	137.396	133.432	137.28	133.933
Result	ID	SBP01	SBP02	SBP03	SBP04	SBP05	SBP06	SBP07	SBP08	SBP09	SBP10	SBP11	SBP12	SBP13	SBP14	SBP15	SBP16	SBP17	SBP18	SBP19	SBP20	SBP21	SBP22	SBP23	SBP24
SD=10	Sim00	133.238	142.544	123.216	141.993	147.991	144.936	124.626	137.768	128.502	136.074	159.912	131.481	127.121	138.471	110.383	140.519	133.199	136.763	138.023	125.94	133.358	141.883	134.381	118.462
SD=10	Sim01	117.513	142.063	122.522	116.703	133.453	147.551	144.735	126.645	130.208	148.061	99.9713	131.012	134.766	115.357	136.156	163.69	138.559	122.691	127.405	112.987	122.464	141.634	134.192	142.667
SD=10	Sim02	136.169	132.348	137.418	138.421	142.646	131.261	135.602	133.06	135.554	125.139	121.894	143.322	128.2	126.451	124.325	141.231	138.643	127.437	117.387	137.001	131.011	148.073	153.227	136.207
SD=10	Sim03	130.312	136.895	134.291	117.984	135.497	135.099	148.394	123.103	150.194	128.808	118.795	137.737	148.628	135.044	130.487	138.179	123.414	133.869	131.308	135.814	127.728	137.971	131.83	125.781
SD=10	Sim04	134.24	130.093	106.792	119.332	127.414	140.943	114.072	137.949	148.486	133.126	124.857	135.125	138.609	147.251	121.061	133.013	131.234	134.764	107.79	121.946	115.079	112.04	134.563	120.712
SD=10	Sim05	124.327	127.076	128.085	147.344	128.537	124.919	113.966	134.89	148.553	135.423	130.396	139.09	138.818	117.438	136.924	140.674	141.059	139.926	126.422	138.097	140.28	139.317	120.912	139.363
SD=10	Sim06	145.498	133.895	132.141	150.025	143.026	130.947	133.094	159.679	118.125	144.339	151.881	130.14	135.29	133.323	138.944	143.979	133.597	131.708	137.188	155.607	148.529	162.458	141.623	123.317
SD=10	Sim07	140.083	132.801	145.422	126.132	134.267	140.374	139.272	140.781	136.394	124.659	121.788	142.49	116.433	146.023	148.093	133.649	133.966	146.46	141.377	138.526	124.212	138.739	128.579	145.044
SD=10	Sim08	122.681	142.149	138.995	145.425	150.725	141.172	137.224	140.423	124.908	128.733	135.39	134.448	133.488	127.938	131.684	132.878	153.68	135.308	143.713	134.684	153.916	148.663	146.476	146.662
SD=10	Sim09	137.513	136.13	133.876	132.119	139.82	133.834	130.158	139.94	121.343	126.43	133.985	120.966	138.262	152.26	111.131	123.861	117.659	130.849	141.045	124.85	117.058	131.774	121.157	115.362
SD=10	Sim10	125.623	134.238	138.48	137.109	150.834	135.404	131.108	139.339	144.832	138.961	129.301	143.265	133.549	148.331	152.563	154.865	139.573	147.867	148.991	137.098	141.278	127.051	138.709	149.541
SD=10	Sim11	134.844	127.737	135.923	132.108	134.664	158.582	138.783	133.215	136.824	152.254	157.141	141.071	129.065	134.208	141.874	119.232	130.652	153.934	135.368	140.799	139.526	158.211	147.782	134.933
SD=10	Sim12	129.278	124.909	134.308	143.878	133.438	139.779	137.37	147.838	110.886	128.303	135.387	117.936	137.847	131.075	141.806	132.345	152.924	132.595	143.013	130.538	134.469	141.207	136.929	136.052
SD=10	Sim13	140.153	132.016	122.255	127.258	122.667	126.635	130.382	128.553	140.591	131.955	129.331	127.149	139.183	123.1	128.873	139.182	123.332	146.574	142.845	142.268	130.526	131.766	131.629	142.822
SD=10	Sim14	138.502	133.658	134.308	123.7	133.535	131.048	123.617	143.27	147.526	149.789	135.114	110.553	151.477	132.839	133.42	130.912	134.946	144.194	139.819	139.217	140.165	143.902	132.358	150.63
SD=10	Sim15	135.392	129.67	121.838	124.617	128.515	140.721	145.825	144.378	128.181	144.456	131.068	137.304	138.014	125.76	144.762	129.968	127.452	127.979	137.481	132.144	121.543	124.147	141.603	121.784
SD=10	Sim16	123.747	136.247	137.059	160.394	127.41	123.427	138.46	125.934	122.546	119.154	130.939	139.324	154.474	147.298	138.979	132.192	131.839	138.875	140.295	149.009	152.19	132.476	141.497	127.659
SD=10	Sim17	137.553	140.115	125.292	145.759	133.392	141.655	118.433	132.447	135.88	132.628	126.685	133.409	119.026	150.617	126.317	127.086	126.846	137.818	150.662	127.431	143.763	135.848	147.534	140.214
SD=10	Sim18	145.423	131.784	155.358	139.209	147.861	151.348	141.307	138.906	144.588	139.449	144.341	127.299	156.398	146.32	133.395	144.668	127.592	133.267	145.025	136.884	138.676	141.673	120.621	140.219
SD=10	Sim19	144.034	139.322	131.725	125.431	116.832	143.961	128.842	122.969	135.038	149.972	144.225	146.132	131.06	145.196	146.52	159.22	113.893	134.375	123.602	134.647	151.07	154.413	140.369	130.998
SD=10	Sim20	135.483	124.871	149.045	123.014	137.354	129.607	134.456	134.249	126.712	134.886	129.141	145.137	132.112	139.979	136.148	125.85	120.161	141.772	135.55	134.095	121.755	136.989	121.545	128.369
SD=10	Sim21	133.153	134.13	131.679	129.904	124.297	139.194	127.771	121.142	115.938	136.65	133.669	149.838	128.006	130.76	137.964	127.329	127.171	122.285	140.412	132.088	124.516	148.716	127.116	126.344
SD=10	Sim22	126.539	143.966	129.064	147.951	147.636	143.338	145.387	137.565	131.742	134.822	149.406	155.802	139.375	136.854	130.994	137.707	143.993	146.517	127.106	137.465	151.889	139.694	141.829	131.379
SD=10	Sim23	131.943	130.788	130.699	148.857	114.473	131.698	148.945	129.203	142.394	141.567	122.254	136.919	133.806	134.28	130.773	137.087	151.416	126.339	146.38	150.334	145.042	148.867	147.096	153.736
SD=10	Sim24	141.614	124.229	148.859	122.939	151.336	138.407	133.726	145.87	150.148	143.822	130.879	138.848	153.246	160.758	136.122	133.303	139.361	133.942	131.686	150.212	136.496	121.989	130.384	131.83
SD=10	Sim25	133.031	125.428	136.978	116.864	136.725	135.122	128.254	124.926	130.514	119.859	141.179	135.414	148.781	118.658	128.798	137.849	133.126	111.198	127.552	127.491	145.793	135.766	125.965	124.6
SD=10	Sim26	134.371	129.762	112.065	113.014	146.223	122.512	145.843	152.873	118.805	136.948	134.717	125.216	145.231	122.358	153.912	132.068	137.199	152.073	143.126	146.139	122.308	126.302	142.07	136.462
SD=10	Sim27	132.011	135.89	142.675	135.848	133.595	133.01	131.784	131.696	118.169	128.042	137.814	129.442	123.263	119.873	115.577	109.182	126.103	106.298	118.63	135.835	111.696	118.413	132.826	136.26
SD=10	Sim28	138.124	154.411	131.087	149.946	142.218	140.14	128.599	136.295	140.428	136.438	125.892	134.715	146.755	151.696	147.071	155.308	136.242	134.79	136.578	142.074	133.845	133.229	113.063	156.491
SD=10	Sim29	130.209	124.455	170.121	146.578	142.836	132.295	141.538	146.583	144.028	118.373	132.633	133.326	132.429	133.11	131.723	125.648	132.903	139.938	133.39	139.01	163	146.524	131.939	133.95
SD=10	Sim30	135.159	133.667	127.465	144.064	114.515	140.223	127.136	126.328	111.07	118.113	116.829	141.366	144.055	138.486	135.062	106.109	115.91	133.818	115.46	126.567	154.04	141.312	156.892	115.404
SD=10	Sim31	129.322	129.685	122.906	139.725	128.13	144.496	145.24	125.934	159.282	127.996	157.738	149.018	120.718	130.93	133.767	145.129	130.336	152.773	131.169	132.167	121.66	139.565	144.426	137.883
SD=10	Sim32	146.535	136.294	129.874	125.117	135.18	132.419	124.229	124.812	129.314	113.004	126.845	135.197	141.574	135.781	136.371	125.327	125.755	122.885	136.927	141.659	134.31	111.626	129.961	120.937
SD=10	Sim33	150.017	146.257	134.375	125.074	136.681	143.502	137.929	136.366	142.028	137.292	142.941	136.432	131.473	136.672	145.473	150.193	133.653	135.408	142.758	141.428	128.353	145.19	142.511	146.965
SD=10	Sim34	133.618	131.003	138.896	139.789	133.048	147.418	108.345	137.144	130.14	115.56	134.237	129.202	138.95	139.243	145.236	146.723	136.301	141.404	125.572	146.511	138.44	125.744	127.78	140.666
SD=10	Sim35	141.011	123.85	130.695	138.551	152.562	121.655	144.97	150.703	139.572	134.193	133.947	129.299	152.2	139.011	134.304	138.993	129.745	123.91	130.471	117.978	129.858	142.73	134.765	136.269
SD=10	Sim36	139.947	134.83	151.503	122.429	123.967	144.591	117.926	140.276	135.637	147.396	130.472	127.931	134.882	126.9	134.951	148.659	140.353	146.562	155.1	147.888	134.586	136.514	137.599	144.789
SD=10	Sim37	133.14	129.665	134.34	150.535	116.748	138.511	151.381	146.074	125.568	140.424	127.807	119.919	138.03	132.346	123.446	115.84	149.257	148.442	123.922	124.931	141.266	132.65	134.56	115.343
SD=10	Sim38	129.149	132.123	159.054	131.14	127.007	145.066	128.929	126.645	128.495	152.057	130.771	144.972	132.904	122.06	121.3	129.307	127.935	146.28	123.507	136.683	132.015	139.916	132.698	120.931
SD=10	Sim39	122.97	134.934	133.49	130.43	137.722	147.637	131.398	130.666	148.073	139.153	122.19	128.791	111.262	116.052	110.727	127.408	135.024	126.818	137.402	122.907	117.993	132.422	127.371	152.931
SD=10	Sim40	133.636	140.097	140.082	132.152	146.496	137.861	130.789	121.95	130.239	115.899	134.18	142.274	135.86	134.211	142.815	133.471	140.863	126.744	137.524	121.177	138.897	126.75	140.626	148.335
SD=10	Sim41	129.983	118.476	142.543	130.343	130.23	141.166	137.323	133.527	137.105	130.726	138.699	118.836	156.894	138.343	129.685	129.552	145.718	149.923	138.213	125.679	139.684	130.628	149.755	145.066
SD=10	Sim42	148.305	130.674	136.56	128.789	129.239	153.317	128.96	128.203	135.727	138.488	139.833	133.969	129.492	132.898	136.405	132.652	149.47	121.822	126.916	129.81	141.535	146.228	128.242	136.481
SD=10	Sim43	123.94	119.005	137.553	129.979	132.274	129.841	140.871	118.756	130.188	140.75	129.529	133.79	126.367	142.173	145.599	145.729	134.467	158.191	138.766	149.89	136.203	145.124	130.223	124.131
SD=10	Sim44	137.85	130.729	139.93	135.031	124.286	130.189	136.581	137.008	132.759	124.352	133.904	123.562	134.86	137.713	133.668	136.366	133.508	140.899	130.507	143.541	131.509	126.025	142.039	139.603
SD=10	Sim45	135.003	123.309	140.541	130.26	134.488	146.487	134.364	122.077	140.042	145.129	148.575	122.661	116.267	149.02	120.164	145.922	139.985	134.689	146.53	131.068	164.104	136.964	126.421	137.01
SD=10	Sim46	141.29	144.582	126.008	142.126	132.312	131.054	118.927	141.871	124.99	141.342	143.225	129.59	135.86	121.893	125.424	143.297	145.093	136.101	143.963	152.008	143.608	132.416	134.112	156.424
SD=10	Sim47	141.553	121.897	117.649	131.566	145.542	143.522	139.234	155.931	127.246	117.819	121.097	150.246	117.082	129.117	128.536	149.372	126.354	130.194	118.197	128.843	159.402	134.504	125.775	135.439
SD=10	Sim48	129.665	128.426	135.402	130.929	122.419	143.156	116.915	143.221	120.913	131.623	125.677	123.113	129.647	138.16	155.208	121.546	132.328	126.63	118.175	139.476	131.92	138.516	134.166	120.647
SD=10	Sim49	118.19	126.913	143.108	137.172	141.891	143.721	119.565	142.04	132.902	147.971	122.709	142.654	134.062	118.794	146.441	139.992	138.586	126.879	137.192	139.374	129.64	154.21	145.201	143.819
SD=10	Sim50	125.148	137.167	129.934	139.633	145.279	137.904	142.771	140.202	125.136	136.309	155.698	143.833	130.14	138.126	144.05	134.051	138.516	151.572	121.226	143.238	132.535	136.378	143.094	138.67
SD=10	Sim51	131.56	124.877	121.781	150.898	123.976	136.159	134.461	125.691	136.368	158.259	119.939	126.365	128.377	141.007	125.119	149.597	136.811	134.268	145.632	105.009	139.989	128.422	134.462	130.121
SD=10	Sim52	134.594	149.379	149.435	144.9	135.583	148.182	148.187	120.744	141.719	143.621	119.577	132.458	140.627	139.236	129.568	132.137	136.536	126.259	153.14	125.82	136.403	131.893	150.745	149.102
SD=10	Sim53	118.108	138.575	114.611	128.927	123.829	140.907	118.162	143.699	124.585	127.162	132.692	139.197	128.102	136.36	148.772	127.818	131.387	140.748	134.156	131.023	132.153	136.397	130.292	137.144
SD=10	Sim54	130.803	135.515	145.331	136.424	144.343	128.985	142.441	140.141	149.734	139.807	127.911	125.945	138.328	145.382	133.215	139.843	163.008	153.084	136.63	145.486	131.186	125.913	137.849	161.599
SD=10	Sim55	138.444	117.075	141.958	118.074	129.613	139.237	127.487	137.851	143.769	131.592	125.587	111.269	110.496	143.191	130.725	148.906	129.962	126.879	139.485	143.27	133.732	124.764	139.545	131.609
SD=10	Sim56	137.6	126.361	128.183	123.179	129.161	144.5	149.194	127.631	120.696	123.335	127.179	135.796	131.328	140.196	128.952	141.818	126.319	137.826	133.546	131.87	134.265	112.064	127.407	132.5
SD=10	Sim57	147.554	121.404	133.802	122.029	132.209	125.927	144.666	127.907	118.477	126.205	128.931	136.849	130.829	115.208	125.219	122.441	131.266	114.348	145.47	128.68	132.344	131.783	130.763	139.606
SD=10	Sim58	151.092	138.826	125.694	161.838	133.429	154.424	154.464	138.453	139.372	131.092	127.333	140.967	151.661	138.901	137.059	142.881	135.602	154.973	132.598	143.318	135.413	135.113	139.075	131.449
SD=10	Sim59	131.521	147.314	145.334	143.337	131.07	122.948	135.554	141.528	124.615	137.494	147.009	134.901	130.695	149.006	148.497	146.8	130.94	142.561	146.305	131.386	136.899	131.777	130.548	144.585
SD=10	Sim60	132.975	134.748	97.0784	135.506	126.927	141.551	119.26	115.548	149.44	142.827	130.432	132.422	135.528	118.466	124.317	113.421	127.09	150.006	144.34	115.96	152.225	124.238	122.845	125.291
SD=10	Sim61	135.327	140.576	147.029	147.868	139.566	131.081	133.979	138.788	137.93	131.366	121.775	142.852	134.072	134.128	137.443	139.274	146.017	124.766	137.064	132.513	121.012	144.368	142.199	121.953
SD=10	Sim62	137.323	155.279	145.615	135.543	147.705	134.265	124.228	158.236	118.614	140.347	141.746	154.558	134.529	152.237	127.975	130.666	119.607	143.137	128.872	120.047	124.259	121.034	145.663	127.229
SD=10	Sim63	140.974	126.024	133.223	137.598	126.963	125.508	153.326	139.437	124.115	132.656	132.575	125.024	122.667	128.675	128.704	126.325	132.233	128.696	139.167	126.598	130.8	126.749	130.072	131.375
SD=10	Sim64	132.138	141.801	136.264	128.583	126.273	129.563	134.616	121.334	144.074	131.756	119.668	131.008	130.617	135.097	134.836	116.511	143.94	127.258	120.589	125.686	137.973	142.26	128.371	130.153
SD=10	Sim65	136.939	142.018	143.272	158.557	136.271	104.849	155.331	124.079	145.305	139.422	135.243	126.538	142.308	112.594	133.467	147.217	129.109	136.143	131.344	145.327	124.191	127.683	143.227	134.493
SD=10	Sim66	129.814	139.534	136.486	120.716	139.945	130.322	124.737	128.319	134.069	134.806	121.854	139.476	153.841	135.569	123.734	127.101	138.983	164.805	141.635	155.903	137.876	120.801	130.99	135.146
SD=10	Sim67	136.036	141.872	125.306	127.272	128.305	138.94	137.894	124.389	123.606	134.182	134.362	120.781	119.891	136.338	137.728	141.496	127.047	132.475	131.936	135.262	129.321	123.485	131.482	133.192
SD=10	Sim68	130.986	144.619	122.725	122.104	126.859	133.664	153.675	145.535	144.705	129.865	114.125	130.855	142.102	137.04	136.12	137.136	137.901	153.723	115.848	127.838	140.317	128.539	160.617	131.243
SD=10	Sim69	140.988	135.869	140.095	142.435	136.908	112.707	124.564	121.902	139.618	98.0257	138.059	147.641	139.493	132.182	106.727	118.52	129.865	148.239	136.973	127.139	150.165	137.153	132.344	125.992
SD=10	Sim70	126.476	134.886	121.802	133.3	133.127	114.112	137.234	126.861	120.52	133.547	132.43	128.583	129.119	135.652	114.769	106.298	123.087	135.407	140.958	130.594	136.402	148.758	95.8527	128.434
SD=10	Sim71	148.443	147.246	138.996	145.082	125.131	131.505	112.849	131.548	139.487	135.881	147.879	128.946	137.847	142.448	126.984	155.952	115.086	139.892	145.756	138.258	126.798	142.785	139.622	128.387
SD=10	Sim72	136.105	125.198	141.918	147.315	146.924	128.438	114.16	129.095	133.636	136.957	141.9	140.719	150.082	133.44	132.054	142.26	149.435	142.388	123.877	127.252	119.055	128.678	134.602	123.678
SD=10	Sim73	133.93	146.051	137.34	146.455	129.025	145.067	144.296	151.889	151.929	135.229	138.069	149.62	143.861	150.274	127.73	160.543	127.778	138.658	121.728	136.762	122.532	120.162	124.177	136.218
SD=10	Sim74	131.664	141.278	136.205	145.8	133.344	133.007	130.969	144.032	140.081	136.287	149.273	125.665	143.393	130.39	137.787	118.103	135.453	156.922	146.435	120.049	148.053	131.173	149.375	140.07
SD=10	Sim75	164.233	131.107	138.613	124.989	123.67	141.397	143.696	136.978	136.713	142.481	137.192	129.084	144.647	154.816	135.064	124.056	130.752	146.765	154.447	131.48	136.961	140.663	130.68	150.825
SD=10	Sim76	125.717	135.899	126.75	133.597	139.024	110.649	117.177	131.196	131.949	120.871	121.148	132.767	127.675	121.515	125.888	118.976	136.76	118.08	133.65	109.109	129.031	134.804	126.584	144.06
SD=10	Sim77	132.919	130.079	134.02	151.69	128.032	133.554	135.918	120.892	125.65	145.539	133.142	121.335	133.548	135.159	135.859	130.106	143.388	140.939	132.866	148.918	135.06	129.307	127.772	137.023
SD=10	Sim78	118.201	136.219	154.974	135.304	146.026	138.385	137.149	147.949	115.522	136.523	113.239	147.545	147.725	137.756	129.416	128.819	147.695	136.617	130.492	145.11	142.91	147.779	131.808	140.932
SD=10	Sim79	134.483	130.449	140.182	136.742	139.542	141.832	142.806	140.584	144.395	139.77	122.52	145.479	134.854	130.409	143.299	131.642	131.439	124.95	135.132	126.583	122.433	128.822	141.209	137.398
SD=10	Sim80	146.343	120.941	148.506	151.092	127.113	135.438	124.467	130.366	132.502	121.783	126.841	140.019	133.85	119.107	140.55	146.432	122.507	115.506	130.357	136.67	132.086	144.086	143.512	145.868
SD=10	Sim81	145.796	144.624	135.399	137.203	132.089	133.824	127.19	123.927	142.636	148.529	138.312	125.001	136.89	130.99	128.047	126.972	128.016	161.027	147.062	141.814	145.698	147.223	125.922	149.499
SD=10	Sim82	146.16	126.691	130.816	137.961	142.159	139.979	124.354	143.659	143.306	138.378	141.872	132.719	140.991	132.433	154.306	140.119	146.202	147.849	121.949	132.19	137.983	136.452	133.03	126.342
SD=10	Sim83	123.277	143.196	136.379	132.68	143.531	125.341	142.27	136.399	115.041	124.077	138.661	123.364	143.859	149.209	116.984	156.217	122.587	119.4	118.583	124.839	124.542	133.383	130.74	155.456
SD=10	Sim84	130.267	131.627	140.885	116.79	123.405	131.427	126.14	123.97	124.686	131.914	118.285	146.701	150.228	154.563	139.258	136.432	119.3	154.398	128.624	130.51	138.116	142.725	116.232	119.813
SD=10	Sim85	108.462	127.696	147.838	139.019	137.78	130.045	134.433	124.344	146.023	129.156	128.476	112.799	137.823	127.983	133.895	128.186	127.992	150.958	130.417	131.442	144.171	120.541	131.366	138.792
SD=10	Sim86	136.937	152.829	126.503	139.475	151.414	134.534	153.782	132.125	137.26	114.854	126.47	155.753	127.788	135.835	127.827	143.874	144.786	142.963	124.74	127.973	139.882	152.183	148.756	134.092
SD=10	Sim87	136.884	151.818	128.592	138.534	139.587	147.97	128.989	141.602	130.556	134.168	141.516	145.688	145.248	127.291	150.73	140.165	138.317	150.033	145.758	131.217	143.575	132.256	138.238	135.3
SD=10	Sim88	132.874	135.947	148.19	131.546	131.474	130.026	143.357	123.468	142.396	140.44	140.286	140.832	140.734	141.626	146.795	149.475	131.668	140.068	137.047	139.905	152.319	143.853	148.267	135.143
SD=10	Sim89	122.995	128.052	129.042	148.358	121.116	129.65	126.774	139.243	134.403	137.7	124.561	159.671	118.366	125.561	130.81	128.13	135.014	125.479	130.546	134.115	140.088	131.221	129.889	132.762
SD=10	Sim90	117.008	135.022	125.806	112.095	133.931	129.867	149.459	133.307	145.396	152.448	143.114	113.44	132.1	147.067	137.921	119.48	135.442	159.879	156.595	135.538	136.855	149.21	135.366	152.817
SD=10	Sim91	120.463	127.011	153.186	123.129	134.926	143.711	132.642	140.143	140.706	144.343	122.806	139.442	143.82	128.48	121.303	128.738	144.84	129.161	141.311	126.598	143.415	159.169	139.641	129.009
SD=10	Sim92	125.221	127.357	129.268	131.743	126.594	139.221	132.992	142.828	152.791	135.097	129.577	127.386	137.668	129.624	139.612	137.352	139.571	130.852	131.976	94.6743	134.679	123.662	117.271	140.086
SD=10	Sim93	141.863	117.504	133.388	130.207	142.051	120.545	142.367	141.51	136.475	140.967	132.6	123.375	124.673	120.748	130.896	118.404	145.309	125.921	119.811	141.983	129.685	149.46	145.163	115.655
SD=10	Sim94	151.902	121.004	133.563	142.923	134.905	122.481	143.041	147.271	137.972	137.595	148.571	133.655	154.689	139.15	147.118	123.516	137.209	129.225	129.068	158.479	129.258	130.651	139.676	134.848
SD=10	Sim95	134.452	154.742	144.482	128.523	125.052	146.576	124.028	162.733	132.879	135.991	142.636	157.586	134.972	116.76	138.774	126.812	134.661	130.102	132.842	131.24	147.243	146.804	146.489	136.433
SD=10	Sim96	137.521	147.779	117.392	135.393	140.071	130.21	133.336	132.043	129.868	124.659	152.084	141.684	133.153	132.99	150.941	129.471	134.361	147.794	134.774	130.404	131.454	149.369	123.047	131.517
SD=10	Sim97	150.337	144.097	131.703	137.084	129.99	124.724	142.475	124.211	132.786	135.473	126.803	128.182	137.723	117.995	138.62	118.476	131.125	132.661	129.343	110.697	132.093	131.604	128.501	111.332
SD=10	Sim98	137.615	136.606	135.912	125.473	140.082	143.838	140.302	150.844	144.046	137.209	129.077	124.581	124.595	151.83	148.142	127.254	149.365	139.859	144.924	135.606	124.769	138.077	117.894	137.515
SD=10	Sim99	156.91	124.574	128.958	123.9	143.98	125.419	125.89	125.354	136.092	120.283	126.486	128.071	139.456	141.677	134.63	147.842	127.456	137.17	129.838	138.972	130.55	118.027	117.686	125.875
Result	ID	SBP01	SBP02	SBP03	SBP04	SBP05	SBP06	SBP07	SBP08	SBP09	SBP10	SBP11	SBP12	SBP13	SBP14	SBP15	SBP16	SBP17	SBP18	SBP19	SBP20	SBP21	SBP22	SBP23	SBP24
SD=15	Sim00	96.0246	148.705	133.168	152.262	121.881	135.236	143.367	144.65	113.837	138.875	158.679	133.023	138.454	100.608	146.086	143.188	130.131	125.308	111.489	134.753	133.676	127.225	101.893	126.547
SD=15	Sim01	113.721	144.876	118.692	148.979	111.46	140.561	146.102	135.239	135.762	126.133	135.974	141.874	147.392	157.359	138.242	110.315	124.354	133.078	133.938	146.231	91.7438	151.385	148.769	118.038
SD=15	Sim02	140.859	127.449	126.501	137.212	150.043	135.278	134.645	146.488	125.1	135.325	143.138	153.662	136.504	147.432	118.865	134.479	139.817	131.96	123.202	129.372	143.829	137.284	118.062	111.729
SD=15	Sim03	122.159	125.672	142.151	124.16	148.873	151.902	134.576	136.114	145.693	126.516	141.138	158.17	154.991	114.751	141.738	148.903	141.595	163.363	160.019	130.292	143.939	116.584	153.269	125.801
SD=15	Sim04	120.88	120.646	126.984	109.991	128.198	117.162	141.345	124.077	107.706	112.285	126.101	131.969	130.037	129.528	144.151	135.875	143.775	126.766	135.713	139.513	152.074	141.02	131.122	119.516
SD=15	Sim05	142.105	113.497	131.312	130.602	136.634	112.327	111.019	130.831	147.066	146.146	126.836	133.7	141.234	150.868	146.572	147.778	111.584	159.287	125.126	136.386	137.391	112.75	157.442	133.582
SD=15	Sim06	135.316	136.644	161.282	140.603	131.127	136.15	140.212	142.286	141.404	149.192	141.054	168.621	120.788	144.338	143.466	155.754	136.244	95.4053	132.943	171.794	125.579	142.242	122.538	136.411
SD=15	Sim07	142.203	124.493	126.072	137.784	117.962	120.583	135.497	131.025	138.699	122.759	140.752	150.639	122.156	153.39	134.8	159.919	139.476	154.063	132.598	105.492	122.966	100.808	122.593	136.898
SD=15	Sim08	136.957	119.574	127.692	138.907	152.99	99.5788	104.374	134.905	129.181	144.456	131.113	125.766	167.238	142.724	125.52	145.116	108.335	123.48	159.185	110.118	144.664	109.697	139.819	122.744
SD=15	Sim09	116.59	141.033	157.557	116.296	166.927	143.178	119.079	124.227	137.419	129.189	122.424	110.822	151.501	141.524	154.147	146.497	135.38	150.036	146.404	148.26	104.957	147.362	116.799	149.882
SD=15	Sim10	134.285	118.46	137.469	144.433	138.202	123.309	116.679	116.651	129.825	143.248	136.523	160.256	155.612	130.343	118.777	147.132	131.683	145.014	147.243	127.723	129.728	155.241	112.624	159.111
SD=15	Sim11	137.029	153.877	133.118	150.647	136.409	136.823	134.082	121.788	143.647	118.055	143.389	152.279	150.047	153.307	143.419	114.495	147.294	138.723	135.983	139.06	110.935	127.656	141.797	134.237
SD=15	Sim12	149.45	138.076	125.62	118.563	172.743	143.056	143.38	132.002	129.507	169.467	112.469	136.729	123.249	132.606	141.28	133.838	157.809	143.898	136.767	131.536	144.132	135.336	101.223	141.036
SD=15	Sim13	117.306	141.566	125.998	156.775	103.491	164.647	120.733	130.675	134.937	124.647	135.197	123.397	156.133	125.498	127.082	120.412	147.634	123.403	132.853	117.493	137.262	146.71	147.746	133.074
SD=15	Sim14	160.719	143.487	143.081	116.089	149.05	117.634	166.325	143.925	143.727	146.189	162.19	137.239	143.718	141.982	147.929	127.234	119.695	162.252	126.209	130.853	153.752	147.97	153.884	128.892
SD=15	Sim15	135.443	169.138	105.561	123.781	136.489	135.311	140.873	144.921	132.747	107.421	98.0591	180.04	119.098	119.334	147.647	147.599	139.842	135.697	135.738	107.069	122.561	142.483	106.417	113.531
SD=15	Sim16	129.676	141.115	144.821	149.558	147.645	153.029	134.094	165.807	116.711	147.836	132.482	120.396	145.933	134.945	117.404	132.586	153.493	120.39	99.1729	104.779	141.017	114.959	135.486	132.642
SD=15	Sim17	165.497	134.036	135.4	127.05	124.892	116.414	122.278	135.879	109.661	116.423	169.104	137.113	141.822	115.704	146.654	121.772	119.344	147.524	117.742	141.238	135.146	130.793	121.468	140.959
SD=15	Sim18	119.418	132.966	156.715	150.297	137.265	146.662	151.144	117.463	110.973	134.634	151.93	129.013	134.844	119.045	133.792	156.28	125.387	124.692	131.663	121.255	133.646	135.568	116.213	135.784
SD=15	Sim19	131.873	114.899	116.807	159.629	145.421	110.87	127.612	117.193	144.12	164.805	137.327	140.863	130.61	147.942	118.605	149.039	123.083	139.354	110.051	131.653	127.806	128.827	150.142	139.553
SD=15	Sim20	137.716	137.003	105.154	119.1	107.518	126.767	116.624	131.332	135.485	140.95	140.325	126.277	130.143	118.193	142.818	129.944	129.973	144.526	144.691	117.691	128.319	136.85	122.182	121.385
SD=15	Sim21	117.562	113.682	127.882	139.789	144.404	131.719	146.403	152.27	128.451	121.789	129.258	149.285	135.933	154.549	130.825	137.273	101.119	118.326	103.233	137.86	144.311	132.729	125.91	132.603
SD=15	Sim22	122.209	139.221	171.503	145.284	141.21	133.515	148.842	176.584	152.04	124.073	162.414	124.014	140.123	160.57	114.455	141.016	143.031	137.601	128.119	143.047	172.533	137.903	171.17	157.368
SD=15	Sim23	139.701	132.482	138.664	136.422	143.814	144.274	161.192	136.61	148.935	128.329	132.531	131.372	128.024	126.376	137.72	142.567	131.403	126.307	127.511	132.183	141.176	145.47	160.217	150.196
SD=15	Sim24	136.404	149.532	128.981	129.618	155.858	132.325	110.876	148.305	128.232	128.39	141.98	119.777	124.472	134.633	124.965	115.442	133.62	149.645	142.847	109.969	143.64	164.278	155.075	137.73
SD=15	Sim25	118.041	136.344	132.051	135.963	108.456	130.935	133.52	108.955	150.622	124.733	140.459	137.079	128.777	137.125	117.08	121.61	152.334	140.497	135.648	129.822	117.977	135.705	125.856	145.14
SD=15	Sim26	159.6	137.525	111.127	153.5	131.241	118.235	127.951	137.115	145.935	121.397	129.791	151.56	129.779	118.356	152.207	135.73	150.229	142.235	145.217	157.527	149.027	112.712	146.786	141.3
SD=15	Sim27	129.053	159.271	105.843	137.268	146.951	141.677	135.863	143.282	134.003	127.614	112.056	133.226	127.175	127.419	117.936	136.133	78.7912	152.267	129.695	111.488	118.561	128.166	169.976	127.777
SD=15	Sim28	160.193	124.528	137.362	119.899	131.226	154.347	104.017	127.998	136.011	124.178	121.709	125.524	140.731	153.787	139.08	122.987	142.858	141.409	130.097	121.192	141.134	159.428	142.041	116.891
SD=15	Sim29	145.824	159.054	124.432	182.18	133.671	151.049	118.983	137.409	124.568	128.982	139.158	118.451	132.384	140.652	142.905	158.059	132.2	145.825	115.098	118.447	133.917	132.623	126.058	127.48
SD=15	Sim30	137.491	125.823	119.545	126.896	141.656	110.422	114.868	129.277	131.539	130.662	139.979	124.778	148.433	141.529	132.35	129.691	121.833	120.422	134.613	154.777	126.247	147.297	149.633	115.089
SD=15	Sim31	135.243	136.185	155.714	130.988	119.142	147.6	143.291	104.158	147.854	132.08	153.758	138.027	140.318	128.051	162.301	129.246	114.08	155.457	157.415	127.23	132.643	138.679	137.771	144.747
SD=15	Sim32	147.044	151.286	113.91	127.828	134.75	128.348	147.27	134.279	132.472	125.475	121.105	111.34	122.269	131.852	116.579	122.108	133.046	127.445	155.551	127.598	114.893	108.661	150.777	134.728
SD=15	Sim33	141.259	143.885	142.963	137.595	144.311	136.449	148.925	116.239	139.358	157.803	166.723	136.741	175.718	151.479	118.091	143.318	113.358	151.989	135.014	124.107	147.134	138.21	152.582	138.74
SD=15	Sim34	142.739	130.425	138.629	125.809	125.802	136.037	132.152	141.23	119.597	134.073	134.18	139.923	144.286	115.734	156.509	129.543	141.006	111.82	180.924	146.733	133.346	162.33	124.725	111.304
SD=15	Sim35	135.667	143.677	126.331	134.311	144.349	120.681	131.651	136.005	114.769	131.905	140.303	135.572	131.013	143.088	138.099	127.643	137.957	155.093	150.413	123.472	138.543	114.821	139.068	129.979
SD=15	Sim36	156.505	149.023	129.128	129.12	134.67	113.793	143.449	123.525	158.966	138.539	158.632	120.767	138.512	123.294	136.526	113.94	155.31	130.635	131.995	154	148.678	133.309	135.868	128.232
SD=15	Sim37	141.439	124.532	127.979	127.994	127.012	112.506	121.291	137.334	126.664	140.062	148.355	146.889	152.326	118.613	127.678	131.448	135.754	143.692	129.784	125.1	139.366	102.036	130.588	137.421
SD=15	Sim38	137.024	131.996	125.842	147.021	146.156	137.906	152.493	161.705	122.915	150.954	152.031	119.707	123.562	137.536	123.43	114.827	132.609	132.6	157.62	126.61	130.353	150.301	142.945	129.311
SD=15	Sim39	147.227	137.575	138.363	138.876	137.479	132.573	138.59	120.167	131.194	129.441	117.412	126.899	136.622	148.551	136.116	140.215	155.454	111.801	130.024	116.727	117.8	120.145	146.921	130.573
SD=15	Sim40	134.384	115.107	144.804	153.958	129.885	151.287	156.587	134.088	136.697	132.001	145.845	162.79	125.627	159.526	153.684	139.221	143.677	102.693	156.649	132.706	125.336	122.487	124.559	155.329
SD=15	Sim41	142.343	141.46	128.802	161.3	130.155	151.2	128.386	149.054	154.747	146.658	162.819	145.779	144.877	116.628	138.351	118.61	123.4	153.66	142.259	130.398	136.746	129.829	150.034	126.452
SD=15	Sim42	155.864	164.932	121.454	146.711	134.8	144.441	150.333	127.892	135.204	158.685	112.08	152.767	115.35	172.103	117.319	119.805	127.554	140.069	133.066	137.236	148.306	137.016	137.045	131.961
SD=15	Sim43	109.109	130.143	125.197	109.296	133.315	144.94	125.271	154.766	121.491	122.053	119.252	145.624	138.741	121.155	123.162	134.53	145.637	132.737	127.954	90.5698	150.171	142.605	141.016	141.478
SD=15	Sim44	132.528	146.729	116.545	134.378	129.915	145.913	123.84	123.454	172.83	146.308	135.729	133.321	156.643	142.986	135.316	138.351	143.631	126.598	155.777	113.521	136.018	122.534	139.393	110.753
SD=15	Sim45	148.815	136.82	148.154	121.617	133.401	122.27	138.583	129.561	129.341	145.642	134.187	140.196	123.103	122.316	127.198	133.882	139.137	131.718	166.231	121.332	122.014	131.423	147.778	175.268
SD=15	Sim46	134.116	134.918	149.704	145.277	127.288	135.626	130.033	153.653	156.319	152.658	150.706	121.884	156.209	122.603	127.642	120.715	138.178	127.679	137.774	133.69	156.083	141.428	110.032	131.422
SD=15	Sim47	109.752	118.892	131.838	134.477	111.644	110.3	129.603	156.66	134.141	128.866	118.738	154.191	130.771	132.736	139.385	124.347	126.909	122.382	136.621	135.43	145.23	123.293	145.151	152.687
SD=15	Sim48	113.874	129.382	138.573	144.193	116.971	109.567	134.718	108.904	139.945	123.51	127.555	108.912	149.349	124.774	123.533	126.33	124.54	140.733	134.177	150.943	136.906	104.667	125.936	142.514
SD=15	Sim49	124.154	124.084	154.055	139.149	112.408	119.479	112.632	143.269	148.105	160.998	128.637	158.596	139.5	132.455	134.255	137.926	134.594	116.002	133.908	131.59	131.231	159.16	126.595	124.623
SD=15	Sim50	128.55	148.647	141.461	138.626	144.124	148.807	118.308	132.222	127.168	157.74	154.908	132.486	136.238	139.521	129.721	150.044	129.868	155.027	140.423	132.144	142.584	115.585	168.286	121.093
SD=15	Sim51	108.847	110.627	148.014	139.738	124.985	123.623	127.981	115.617	130.07	151.637	109.94	120.599	125.844	136.8	121.149	145.114	144.726	121.006	130.099	152.987	101.953	141.515	121.584	132.534
SD=15	Sim52	100.682	143.678	127.959	116.268	144.821	115.775	126.013	161.882	128.843	141.875	153.178	112.413	131.762	141.162	134.669	134.979	109.649	142.557	151.697	141.451	128.335	129.503	146.914	149.618
SD=15	Sim53	118.784	103.63	151.183	163.09	139.845	146.843	134.191	136.125	139.202	136.472	129.667	137.35	150.326	129.646	151.014	126.954	122.433	141.096	137.387	149.317	154.281	135.597	132.312	144.841
SD=15	Sim54	120.615	159.245	129.162	140.41	132.467	156.152	132.176	131.07	123.029	161.499	143.415	155.121	136.845	142.333	119.953	145.54	138.295	142.99	146.462	125.294	141.573	149.024	144.714	128.749
SD=15	Sim55	125.648	125.83	120.15	109.214	132.204	124.71	111.267	127.424	146.733	122.632	99.0158	145.303	154.646	151.051	152.033	119.589	113.26	155.843	123.331	109.487	155.242	96.6983	142.425	151.163
SD=15	Sim56	127.198	140.378	149.5	138.925	108.764	137.502	141.414	112.186	115.875	108.087	147.714	116.746	108.867	118.188	117.626	120.526	105.734	134.158	125.242	132.416	143.485	158.925	87.2043	109.2
SD=15	Sim57	133.618	148.247	117.406	138.225	123.187	156.631	136.308	131.567	154.821	131.688	124.442	142.209	132.629	156.68	152.979	121.205	161.245	119.741	133.183	136.808	145.734	162.941	144.082	170.078
SD=15	Sim58	146.24	179.345	115.902	135.245	172.063	137.685	154.334	122.349	147.281	165.993	143.829	118.116	143.284	121.217	159.587	167.728	133.565	149.25	120.055	130.837	128.238	150.236	107.274	135.711
SD=15	Sim59	116.986	124.045	140.678	116.614	171.7	137.75	148.427	132.488	122.648	174.036	120.234	135.871	155.193	134.715	143.53	141.955	132.03	122.36	161.916	136.044	125.06	156.031	119.162	138.539
SD=15	Sim60	119.056	124.271	122.597	148.963	127.914	149.609	108.994	115.789	121.029	136.194	85.7994	113.094	137.689	131.282	115.404	132.616	104.517	125.279	129.575	136.855	116.435	127.694	128.946	131.253
SD=15	Sim61	120.937	106.207	128.793	126.154	123.599	138.811	117.295	139.765	102.065	115.564	113.178	148.995	128.983	118.256	148.913	128.798	138.939	151.705	129.789	132.944	128.322	129.149	125.733	130.398
SD=15	Sim62	175.184	115.545	125.757	121.24	145.07	127.266	134.172	104.852	126.534	139.357	158.945	139.993	139.184	152.483	146.625	122.53	128.679	129.134	121.056	139.539	150.156	157.71	128.49	164.853
SD=15	Sim63	140.412	133.179	113.648	122.966	138.464	128.088	133.739	152.39	112.165	152.324	137.406	106.546	105.857	129.756	132.646	133.472	142.693	140.872	139.417	142.662	124.23	113.052	121.811	134.151
SD=15	Sim64	146.225	114.018	134.523	125.946	133.248	124.101	143.091	113.853	129.416	147.919	134.333	135.059	147.981	136.053	122.931	120.473	117.216	149.171	144.486	139.276	107.31	137.307	98.8539	135.675
SD=15	Sim65	148.102	132.455	130.057	114.094	131.002	145.429	114.494	138.339	131.727	140.544	116.311	111.512	136.507	139.088	133.602	114.391	135.666	136.059	141.952	138.564	128.764	123.138	144.297	85.8899
SD=15	Sim66	104.22	105.214	132.687	136.041	121.022	136.555	117.633	112.621	144.562	121.746	138.014	163.222	124.163	138.621	157.528	143.644	125.862	144.383	147.84	141.712	132.621	124.277	140.054	142.481
SD=15	Sim67	130.662	144.968	132.265	124.916	139.1	142.797	143.167	149.821	108.168	116.756	131.767	114.203	116.883	116.427	118.977	146.125	132.737	129.698	137.23	126.557	112.038	134.802	121.18	142.187
SD=15	Sim68	138.902	108.321	166.636	115.019	144.658	125.386	125.533	103.374	124.997	122.032	155.386	114.654	121.821	153.075	139.179	133.983	129.052	106.772	146.961	149.292	142.458	128.32	131.418	135.38
SD=15	Sim69	141.443	142.412	167.645	148.378	127.517	139.096	140.556	142.582	123.844	138.705	117.319	157.937	126.347	117.605	137.063	134.442	126.379	137.301	148.1	156.604	105.826	145.516	134.377	140.547
SD=15	Sim70	125.281	140.598	158.703	146.878	154.912	145.094	150.122	135.598	138.292	132.583	143.142	140.788	97.2348	112.246	151.908	138.473	136.305	118.144	142.538	122.044	146.696	118.409	137.74	140.701
SD=15	Sim71	152.27	150.728	127.815	127.799	125.968	148.86	136.73	122.194	135.953	157.687	135.661	146.626	133.076	171.834	136.181	143.275	164.5	128.902	139.929	124.01	151.554	149.664	145.359	113.295
SD=15	Sim72	145.652	129.914	151.219	156.4	128.274	146.946	123.622	138.013	117.035	125.79	132.607	159.113	182.111	135.258	126.515	126.753	137.491	144.364	163.119	149.159	164.266	161.09	141.285	123.114
SD=15	Sim73	140.304	131.205	146.667	136.853	181.478	140.326	127.204	120.887	137.894	141.005	111.795	105.406	125.616	163.608	110.08	125.592	144.024	122.958	135.296	109.546	133.403	153.713	143.008	129.64
SD=15	Sim74	118.422	133.664	166.782	128.342	134.618	141.258	140.688	116.076	137.408	167.449	137.65	159.579	132.307	120.353	115.8	169.795	139.697	130.393	122.658	153.554	124.969	180.054	146.903	116.723
SD=15	Sim75	127.037	147.823	148.496	125.096	125.26	151.473	145.938	155.106	135.126	158.038	147.062	131.419	158.494	136.546	135.711	120.508	136.464	123.87	165.028	128.557	130.2	169.497	140.155	156.275
SD=15	Sim76	103.011	143.964	103.618	135.612	129.812	130.655	148.039	99.9718	147.069	125.37	118.095	133.128	126.441	152.434	146.183	125.963	115.399	115.903	116.669	130.742	145.091	129.839	94.8903	137.958
SD=15	Sim77	138.774	134.323	121.978	147.348	118.19	142.929	148.047	127.002	154.808	118.684	137.007	110.766	158.243	122.275	133.33	149.878	141.029	144.587	133.445	122.377	119.764	118.807	144.664	152.059
SD=15	Sim78	131.892	145.159	138.007	132.465	144.859	155.987	138.86	137.122	135.174	133.194	132.491	123.826	158.79	139.67	139.693	112.572	133.322	136.378	115.646	137.145	134.533	178.17	144.9	139.463
SD=15	Sim79	152.83	149.239	150.209	151.5	155.328	151.105	98.0216	141.649	161.124	131.325	151.181	148.559	106.122	127.915	136.65	119.974	135.161	106.821	124.467	121.821	126.66	137.602	122.331	131.804
SD=15	Sim80	109.257	131.093	130.642	130.117	136.684	162.243	131.461	120.72	120.945	126.136	132.616	145.114	107.018	146.963	123.261	160.353	127.314	128.745	132.446	127.27	123.594	131.063	135.731	147.078
SD=15	Sim81	106.647	123.967	138.676	140.027	132.395	144.726	156.436	152.076	146.731	165.091	136.782	131.626	141.65	127.015	116.37	156.988	127.506	139.644	152.414	121.471	121.063	136.621	130.855	169.141
SD=15	Sim82	143.372	157.433	129.014	125.908	124.145	140.801	148.264	112.317	116.871	154.226	146.593	144.832	133.932	142.728	134.543	142.8	147.379	122.149	132.036	144.67	117.086	146.388	140.702	109.566
SD=15	Sim83	137.233	108.591	158.85	98.5743	134.705	133.815	133.185	118.424	141.37	131.636	128.845	101.191	130.176	149.103	143.235	132.848	117.716	117.147	108.965	132.209	161.086	153.056	124.459	142.237
SD=15	Sim84	113.446	135.396	145.442	134.255	155.655	137.482	104.509	135.905	121.8	172.741	126.947	141.457	125.921	133.212	110.76	133.697	120.032	128.54	129.94	149.304	147.894	127.02	143.734	127.043
SD=15	Sim85	119.437	138.482	129.579	140.11	138.748	125.472	112.83	127.705	112.885	123.112	135.072	123.857	126.171	124.697	125.025	134.907	117.374	119.632	145.685	135.745	145.753	162.382	154.713	122.259
SD=15	Sim86	150.621	103.17	133.256	166.68	157.471	113.565	138.261	127.716	157.72	111.148	120.185	138.478	158.297	144.491	117.931	120.048	150.326	152.257	152.132	156.822	128.382	156.669	150.676	148.862
SD=15	Sim87	142.131	138.822	153.553	127.028	138.75	132.326	154.637	134.906	143.129	117.46	142.77	108.073	127.278	157.544	121.949	136.879	153.554	132.069	143.63	150.68	119.341	161.894	133.505	120.573
SD=15	Sim88	141.381	153.682	163.193	121.018	118.163	147.303	97.0776	135.027	132.86	123.646	141.346	130.133	165.274	132.319	137.753	148.444	140.166	155.841	126.172	151.878	138.013	137.198	135.78	139.381
SD=15	Sim89	112.817	125.841	114.642	156.37	113.969	129.981	122.82	138.377	155.219	122.561	128.003	149.011	159.919	124.323	131.003	138.038	129.934	114.786	131.867	134.397	157.238	114.862	146.26	127.938
SD=15	Sim90	160.348	144.301	151.522	131.263	150.195	142.111	127.434	128.434	161.453	135.718	165.084	158.928	144.205	138.153	146.752	140.463	156.734	129.715	157.06	135.94	157.25	130.383	149.537	120.203
SD=15	Sim91	132.28	157.417	161.517	132.239	136.223	148.614	141.072	127.521	117.331	133.026	149.871	128.563	132.071	135.46	137.84	134.718	135.049	120.689	132.451	149.041	126.81	164.749	126.605	128.91
SD=15	Sim92	123.098	140.736	142.555	116.627	111.558	131.151	158.166	126.19	123.351	119.606	106.725	140.101	120.409	121.408	143.081	127.206	136.646	123.321	116.985	125.415	145.753	146.416	128.05	128.322
SD=15	Sim93	138.694	143.206	138.829	130.72	139.254	123.564	155.314	135.408	143.145	133.964	132.062	137.325	126.262	131.49	128.968	165.298	134.903	141.736	111.711	149.601	119.27	144.125	129.879	128.485
SD=15	Sim94	127.533	125.085	143.625	150.729	154.694	141.59	149.036	126.338	143.669	160.186	136.955	153.134	128.68	131.308	142.931	152.385	121.128	127.552	134.356	142.603	137.333	155.783	155.994	129.927
SD=15	Sim95	149.482	110.094	137.445	160.733	98.6113	162.128	125.391	122.978	104.053	121.92	151.317	125.852	146.348	163.335	123.78	156.043	102.783	110.237	114.271	116.73	132.148	146.945	156.265	129.81
SD=15	Sim96	134.432	139.868	134.351	133.24	135.064	159.529	113.717	131.874	130.915	146.473	140.767	124.174	117.556	132.707	125.863	153.231	133.215	113.947	128.185	138.87	156.872	130.963	135.576	142.509
SD=15	Sim97	121.516	144.788	145.583	120.253	130.452	129.742	101.956	141.155	114.098	138.126	126.857	131.518	123.311	141.175	140.512	122.336	140.757	164.572	116.217	110.788	131.303	150.691	136.802	151.716
SD=15	Sim98	138.372	126.57	120.534	116.567	149.161	134.418	134.302	155.405	166.785	123.335	171.107	136.368	168.837	101.515	123.054	127.298	167.024	139.981	141.449	137.297	141.842	147.355	157.18	183.072
SD=15	Sim99	128.693	115.193	134.533	144.101	125.743	121.09	123.201	141.967	150.14	140.241	145.85	126.968	143.391	145.033	129.737	121.721	140.179	111.492	135.195	117.196	124.675	119.997	146.192	138.916
Result	ID	SBP01	SBP02	SBP03	SBP04	SBP05	SBP06	SBP07	SBP08	SBP09	SBP10	SBP11	SBP12	SBP13	SBP14	SBP15	SBP16	SBP17	SBP18	SBP19	SBP20	SBP21	SBP22	SBP23	SBP24
SD=20	Sim00	144.66	103.664	149.79	128.45	145.561	143.746	117.135	145.341	150.883	127.441	126.043	172.595	108.236	139.57	131.828	130.605	116.26	141.598	154.901	127.317	111.509	155.829	173.005	151.716
SD=20	Sim01	141.404	113.369	122.129	98.4109	133.037	165.155	151.493	111.923	135.878	161.318	126.522	145.515	128.901	120.618	151.652	138.165	137.007	130.487	128.18	101.319	123.484	150.622	163.035	118.823
SD=20	Sim02	124.92	156.85	125.914	111.34	122.92	130.571	135.689	110.365	140.869	149.583	133.536	139.019	142.246	129.226	98.311	156.22	130.639	124.216	121.252	130.26	141.879	95.5665	117.581	123.337
SD=20	Sim03	139.429	156.921	146.429	152.136	130.733	142.705	108.892	148.7	161.35	145.217	153.663	98.7662	141.552	158.697	128.246	149.472	136.089	149.064	166.602	139.044	137.76	115.819	166.326	157.208
SD=20	Sim04	145.644	109.944	137.669	120.105	108.239	108.555	119.01	116.246	122.783	127.071	95.6111	107.928	150.28	140.517	118.597	131.02	145.655	112.156	156.722	107.329	130.895	111.828	104.464	147.698
SD=20	Sim05	139.319	118.777	121.201	147.729	145.867	141.166	162.756	151.152	131.71	123.803	119.816	107.86	132.15	110.337	116.198	125.583	134.452	158.3	143.509	143.105	117.914	142.672	155.849	120.353
SD=20	Sim06	125.741	185.473	105.791	139.66	163.243	163.285	108.037	149.817	154.763	126.009	151.031	145.583	122.453	126.991	127.761	112.57	137.185	118.372	163.645	185.144	146.43	150.359	143.038	113.118
SD=20	Sim07	133.123	122.543	156.131	111.203	135.171	135.163	146.918	125.46	152.765	149.875	114.561	106.505	124.688	143.379	143.76	103.833	125.333	137.205	142.877	138.572	120.217	121.49	143.794	136.089
SD=20	Sim08	144.555	141.876	114.237	146.583	128.247	134.54	136.838	135.729	135.714	120.701	134.135	168.105	144.487	128.824	150.571	152.677	183.966	122.438	148.325	136.321	87.3096	127.609	158.224	120.858
SD=20	Sim09	139.632	151.983	129.474	118.287	118.267	146.317	157.929	134.305	138.981	124.556	145.951	147.566	107.791	105.724	134.789	135.595	120.616	102.848	100.047	135.316	122.357	144.357	137.412	134.708
SD=20	Sim10	135.245	159.465	148.038	148.987	120.492	98.6555	143.652	159.29	177.988	145.956	126.177	98.4693	147.402	150.736	123.058	133.436	117.652	158.865	172.544	123.216	119.674	133.001	153.334	147.001
SD=20	Sim11	169.984	165.718	124.799	146.329	156.618	121.322	125.231	146.943	133.913	154.378	150.486	119.118	146.202	124.641	155.471	109.39	126.67	142.064	124.123	141.073	144.613	107.752	119.108	164.885
SD=20	Sim12	122.417	115.789	131.551	150.405	142.232	160.376	129.285	137.294	108.666	97.0027	164.371	146.885	155.048	186.022	152.4	137.566	152.992	145.594	149.315	133.52	145.217	129.165	133.455	147.372
SD=20	Sim13	113.165	126.67	133.303	124.2	124.684	148.446	151.154	135.803	135.546	98.8294	118.172	136.112	109.961	126.573	125.595	122.324	161.598	140.305	136.529	138.708	154.102	112.332	116.945	132.78
SD=20	Sim14	147.997	105.524	152.515	137.477	146.517	133.816	143.409	121.866	159.408	124.514	155.411	123.482	98.948	148.518	155.927	152.207	154.559	153.129	137.686	145.816	164.449	140.389	124.474	127.085
SD=20	Sim15	166.838	147.097	166.676	119.95	147.018	120.315	108.66	127.126	137.575	129.925	139.015	149.406	151.965	134.1	101.14	148.825	136.415	108.896	134.412	136.766	105.841	142.446	139.68	136.251
SD=20	Sim16	130.723	97.621	153.511	161.787	115.123	140.658	81.8334	172.507	128.531	144.192	141.925	123.489	140.948	133.319	130.372	94.6793	110.554	120.653	145.532	139.74	119.624	155.952	132.231	116.828
SD=20	Sim17	119.896	115.774	153.472	132.713	129.301	97.5925	138.202	101.379	134.724	129.598	102.545	171.216	116.783	132.67	126.98	141.634	86.6801	143.662	144.639	138.293	128.94	153.23	119.976	97.0089
SD=20	Sim18	140.565	158.495	164.488	142.625	134.787	141.878	129.397	165.102	133.484	115.849	145.324	137.6	145.092	115.736	130.961	158.626	135.215	141.661	119.581	128.855	114.295	114.307	151.66	117.843
SD=20	Sim19	97.8196	158.631	93.559	131.474	157.919	124.352	106.897	138.1	135.891	126.74	103.481	155.384	173.715	130.815	126.89	148.78	133.34	88.0662	149.871	148.511	172.114	128.814	109.263	148.884
SD=20	Sim20	116.599	154.739	140.39	98.6905	138.075	99.4118	136.121	131.01	106.891	98.6517	124.015	115.48	154.823	146.903	146.633	152.752	96.9053	131.035	119.498	127.895	113.755	86.1818	111.663	118.118
SD=20	Sim21	176.735	133.564	147.985	127.701	119.778	108.051	126.459	139.455	121.536	113.374	122.204	167.502	104.386	130.882	163.701	106.503	128.538	159.297	139.2	89.2443	153.278	163.642	136.52	116.73
SD=20	Sim22	152.353	113.824	134.635	139.294	123.596	141.081	135.254	158.589	133.636	105.367	120.941	123.488	117.361	111.662	97.0142	158.74	137.584	148.461	126.814	109.821	159.357	138.585	133.649	154.884
SD=20	Sim23	135.448	149.787	171.232	145.395	134.286	146.886	124.36	119.975	157.165	121.477	131.682	106.139	122.324	118.47	118.098	156.35	123.426	121.318	164.084	126.63	160.084	150.996	153.856	159.058
SD=20	Sim24	148.705	177.469	142.411	136.808	163.389	155.532	117.266	123.518	123.531	146.949	132.401	156.593	109.964	120.37	152.999	156.993	114.492	108.281	121.821	171.287	135.08	113	128.277	136.321
SD=20	Sim25	134.903	113.318	111.038	159.677	156.176	156.057	137.211	129.941	131.888	149.335	124.016	89.0238	101.635	121.526	162.298	112.114	117.593	101.303	113.515	132.799	147.135	128.117	156.339	153.733
SD=20	Sim26	105.227	134.639	158.427	175.857	128.157	147.988	142.442	123.485	111.651	135.163	162.134	146.025	171.682	129.927	121.444	138.149	168.164	103.105	126.784	129.088	88.2342	145.676	162.387	166.85
SD=20	Sim27	106.019	110.347	94.7081	122.543	114.943	148.687	125.596	146.701	109.291	131.81	172.168	127.516	124.24	147.448	109.173	128.712	133.44	92.6904	113.551	118.891	179.55	134.946	121.565	119.148
SD=20	Sim28	166.03	135.314	146.197	138.759	175.461	147.007	113.541	121.901	96.4577	131.98	128.936	121.866	108.291	159.972	140.316	168.719	121.299	124.847	155.416	123.049	114.509	178.465	113.776	138.26
SD=20	Sim29	156.267	86.017	115.977	148.739	106.243	139.099	120.72	116.542	117.969	133.496	142.068	140.548	139.812	136.424	170.494	134.142	123.663	66.0676	125.493	138.752	130.42	114.514	154.238	134.17
SD=20	Sim30	134.205	161.269	148.981	116.586	124.125	121.203	137.048	132.482	131.3	110.168	127.113	117.3	110.66	158.1	158.148	136.814	118.602	125.23	124.502	96.5378	125.408	133.978	106.053	103.234
SD=20	Sim31	159.795	151.944	141.302	153.384	120.012	183.584	141.164	127.784	137.738	103.881	131.456	101.339	128.805	143.798	128.722	128.133	110.503	112.402	158.151	137.657	146.584	110.918	137.026	145.975
SD=20	Sim32	149.509	117.744	147.456	83.503	114.319	142.074	190.486	139.537	133.398	144.56	135.08	100.442	134.966	132.538	139.29	143.866	118.411	134.822	83.5945	127.852	119.46	144.232	142.471	113.062
SD=20	Sim33	113.417	154.496	132.394	103.268	108.424	121.545	127.565	147.869	152.657	131.756	111.414	108.626	128.755	149.015	163.953	132.96	135.116	123.34	129.927	108.495	147.752	128.101	142.002	168.843
SD=20	Sim34	124.351	118.479	118.966	147.057	129.595	119.638	125.693	116.079	112.73	123.565	101.971	112.044	127.374	137.883	156.98	131.651	169.079	136.506	145.379	122.523	136.129	130.023	77.4896	132.602
SD=20	Sim35	120.229	153.844	139.551	135.91	154.569	92.283	125.28	152.131	134.174	97.3503	161.585	98.738	137.84	166.155	134.534	117.817	141.555	110.241	118.859	109.811	128.616	122.939	139.327	108.013
SD=20	Sim36	154.315	148.47	134.562	162.934	148.068	167.255	133.253	137.559	125.467	137.381	104.486	146.683	151.037	135.543	118.817	115.15	136.829	132.787	145.117	117.567	133.391	153.303	145.111	134.87
SD=20	Sim37	113.433	95.8706	172.944	143.127	175.121	119.208	119.319	147.109	121.993	123.751	142.801	117.532	157.146	110.511	123.012	154.586	130.744	147.485	135.366	100.898	100.352	137.727	123.192	180.803
SD=20	Sim38	154.837	151.162	114.697	143.274	124.772	133.185	106.18	106.799	121.875	128.244	135.597	133.191	113.384	154.795	111.055	133.447	134.677	137.507	148.67	124.604	128.937	152.192	149.516	127.799
SD=20	Sim39	134.168	112.224	123.897	141.433	130.159	135.499	132.956	117.64	115.678	95.3912	153.403	158.19	141.843	130.561	138.445	132.46	168.406	120.972	134.551	135.535	126.503	124.588	148.428	160.607
SD=20	Sim40	148.532	162.866	139.272	123.25	120.672	115.943	166.677	133.161	144.984	145.381	152.736	157.534	147.688	140.815	166.603	142.466	160.709	152.01	132.071	131.364	97.1267	139.043	188.724	149.798
SD=20	Sim41	141.299	113.364	123.646	126.739	115.701	130.707	186.9	181.914	113.261	132.277	139.478	134.22	137.83	151.709	122.554	159.719	117.68	147.765	125.264	152.812	155.494	174.395	157.081	139.003
SD=20	Sim42	121.641	133.385	145.203	119.111	143.752	100.605	113.246	138.52	123.633	137.025	180.416	105.868	135.082	137.068	153.745	134.325	143.97	137.803	132.724	120.685	129.327	128.425	78.9185	112.98
SD=20	Sim43	147.801	136.053	129.505	136.665	124.48	124.678	137.615	139.444	149.376	145.297	128.789	167.837	132.195	123.275	116.388	136.687	137.593	129.385	112.459	118.075	149.348	136.765	131.421	173.46
SD=20	Sim44	152.417	110.101	131.979	130.206	111.78	138.48	146.404	166.289	140.351	126.649	148.448	144.669	98.446	117.455	155.135	106.566	133.523	102.389	145.038	152.492	175.645	145.173	109.217	130.739
SD=20	Sim45	118.422	164.101	138.717	132.442	142.661	130.167	146.617	150.544	128.368	109.083	134.586	122.503	151.735	151.881	113.765	116.947	174.812	122.466	182.777	113.287	126.974	189.397	133.914	120.565
SD=20	Sim46	155.96	144.661	132.275	157.284	144.757	169.537	159.923	119.548	157.852	164.949	143.564	153.754	144.134	121.512	170.651	130.443	142.107	121.394	140.111	143.183	145.693	150.282	127.439	131.343
SD=20	Sim47	125.809	162.602	127.579	111.766	144.585	130.037	160.859	120.715	115.292	163.898	125.35	187.535	150.129	123.973	152.338	92.0863	128.362	132.619	97.6656	137.122	112.06	135.752	119.176	109.789
SD=20	Sim48	157.029	150.117	142.215	140.011	162.991	132.177	130.504	138.03	128.748	138.697	124.827	139.108	148.833	161.692	134.952	137.979	138.752	132.877	157.012	143.068	138.299	137.192	142.31	176.808
SD=20	Sim49	136.363	116.458	101.392	132.69	159.92	102.864	133.766	149.746	117.847	119.413	140.065	142.199	92.3707	126.072	133.801	152.086	123.218	90.1898	145.858	110.936	144.899	126.876	137.121	135.272
SD=20	Sim50	108.466	129.646	130.829	169.44	144.365	147.395	142.556	151.271	152.105	140.89	146.943	164.941	165.93	126.808	141.526	142.285	147.421	155.369	120.841	175.32	176.982	124.78	136.663	167.967
SD=20	Sim51	154.703	141.966	120.814	103.421	112.917	117.861	118.398	129.483	138.496	113.705	158.859	133.268	125.753	142.124	163.516	133.47	150.905	137.195	129.36	122.288	115.756	119.584	123.24	156.11
SD=20	Sim52	144.944	139.367	122.431	108.081	96.2544	140.435	136.038	159.161	148.954	125.163	142.619	104.98	160.244	124.758	136.699	154.193	138.612	157.069	151.041	119.454	114.255	150.539	139.365	146.054
SD=20	Sim53	153.864	143.091	130.975	125.974	137.014	118.149	144.933	147.045	124.133	168.592	152.166	108.641	160.294	164.366	131.62	118.244	134.473	130.687	109.011	174.29	136.966	125.04	128.929	163.699
SD=20	Sim54	102.262	145.4	134.106	172.372	114.314	129.074	159.056	153.351	102.045	141.597	123.407	155.354	137.215	141.857	132.451	181.745	130.815	154.971	140.557	155.819	120.722	140.44	105.42	125.319
SD=20	Sim55	101.966	130.881	151.3	142.017	115.649	137.89	111.954	138.21	142.014	122.828	159.175	119.639	115.304	136.746	83.0314	118.903	141.593	114.044	158.628	137.333	103.048	121.275	158.01	121.901
SD=20	Sim56	150.022	156.203	123.775	127.939	105.712	120.462	128.549	147.904	143.771	121.677	157.457	119.597	154.294	165.19	145.095	112.27	144.677	125.562	152.747	131.12	129.393	105.994	85.997	160.261
SD=20	Sim57	148.59	128.662	176.147	150.893	129.918	94.1305	149.273	175.869	113.61	144.942	108.747	105.449	149.924	138.237	132.367	140.624	173.63	127.611	122.652	158.924	106.361	90.894	144.747	143.721
SD=20	Sim58	132.296	135.152	127.786	154.827	123.027	122.342	140.733	149.429	129.071	132.061	130.641	147.042	124.129	105.824	162.751	151.661	164.341	150.472	133.886	129.311	157.877	130.416	108.663	103.301
SD=20	Sim59	161.96	165.177	127.694	129.718	110.66	146.727	118.635	119.48	166.223	142.694	126.442	149.04	119.598	103.053	105.628	144.733	145.73	131.776	147.976	145.799	161.362	120.724	149.149	149.143
SD=20	Sim60	141.883	118.546	101.696	139.427	122.58	146.43	123.647	141.004	133.192	118.003	173.453	136.696	108.83	123.973	117.983	140.306	183.871	111.782	113.3	154.827	114.908	142.069	151.873	124.227
SD=20	Sim61	124.934	88.566	130.852	150.735	114.026	184.98	141.139	104.23	137.794	126.31	103.006	121.237	143.096	104.376	124.418	133.219	127.212	144.635	130.557	123.494	97.7772	102.475	109.783	138.428
SD=20	Sim62	150.167	124.497	153.989	156.868	152.619	174.704	122.071	150.151	147.202	116.336	124.659	151.933	149.536	136.319	112.979	172.606	139.284	128.657	145.291	142.023	127.522	152.278	127.398	114.165
SD=20	Sim63	109.202	133.738	132.115	112.18	142.499	141.881	107.52	112.034	135.171	133.25	131.363	115.391	136.282	132.548	137.893	127.326	83.3651	144.249	136.518	152.753	142.795	145	163.901	160.107
SD=20	Sim64	112.742	147.338	123.437	105.942	139.318	127.309	139.677	163.226	119.296	139.376	141.487	146.185	148.398	124.206	159.101	117.454	123.732	146.215	139.972	153.141	122.327	136.696	127.465	130.885
SD=20	Sim65	104.759	135.89	156.119	134.481	122.451	148.238	112.154	117.83	182.901	115.926	137.14	99.154	106.803	139.422	135.544	118.388	146.175	132.808	157.424	131.103	141.338	128.157	125.236	132.384
SD=20	Sim66	175.72	165.735	132.388	107.246	160.692	152.153	110.557	122.879	155.919	140.705	160.742	103.53	182.322	160.027	120.446	122.654	134.744	142.371	157.779	122.643	131.839	121.109	119.474	176.686
SD=20	Sim67	141.572	150.731	144.079	152.028	141.688	174.431	136.73	151.765	134.163	149.579	88.3711	140.502	115.895	125.091	157.689	143.38	126.309	129.042	112.996	130.114	162.485	123.627	121.882	128.053
SD=20	Sim68	123.951	158.459	131.426	138.447	140.455	144.349	141.668	164.944	159.102	163.986	118.931	122.746	168.824	109.532	119.268	141.734	137.131	132.248	144.714	131.575	132.255	131.503	152.691	159.315
SD=20	Sim69	155.624	143.455	124.684	127.211	140.67	130.122	129.785	158.872	131.347	98.8895	140.735	135.122	101.703	137.507	119.567	128.867	134.393	113.46	153.125	100.87	121.515	148.668	141.253	121.37
SD=20	Sim70	139.151	124.434	89.1479	131.572	151.421	88.7295	116.933	137.178	116.112	144.453	127.01	140.504	114.552	169.117	115.028	125.872	166.408	129.092	120.436	126.427	167.237	135.701	117.157	140.23
SD=20	Sim71	155.202	119.483	149.428	136.26	142.42	145.613	140.11	150.921	190.288	131.709	154.832	139.194	152.886	132.617	128.695	126.615	136.719	112.991	122.825	119.562	90.7391	134.649	138.087	118.823
SD=20	Sim72	105.333	125.973	133.617	157.162	146.625	137.731	159.703	143.374	149.192	172.202	166.071	150.271	120.458	152.476	121.618	148.933	160.455	142.328	155.316	156.26	115.193	141.807	158.756	178.391
SD=20	Sim73	152.073	159.585	157.393	158.821	156.963	148.027	156.53	129.522	167.369	129.466	116.261	158.998	163.339	163.456	145.559	158.545	132.799	111.078	140.291	127.091	114.156	144.61	123.311	110.689
SD=20	Sim74	105.282	142.386	130.429	105.863	178.259	131.069	166.447	114.043	138.738	124.088	97.5173	118.389	163.52	156.689	119.925	158.278	126.622	165.945	119.304	108.642	168.751	130.816	134.886	144.325
SD=20	Sim75	143.008	130.734	153.903	119.643	110.416	113.271	133.436	165.322	115.308	109.943	149.922	126.698	112.296	118.641	166.648	128.983	163.221	159.085	147.942	128.693	138.418	103.98	107.116	139.881
SD=20	Sim76	129.581	144.709	148.582	149.367	104.595	117.172	111.666	130.472	104.761	129.019	115.516	159.522	150.572	121.048	119.881	152.346	145.402	146.75	135.578	115.278	91.0598	129.632	118.219	125.358
SD=20	Sim77	125.79	121.958	132.425	111.747	148.009	141.513	125.402	108.893	156.993	110.523	162.825	152.663	148.203	99.8752	133.786	125.121	148.455	142.699	114.398	102.769	142.972	133.988	110.475	163.895
SD=20	Sim78	135.464	176.243	139.551	138.828	175.602	161.647	133.489	135.894	139.261	123.171	134.246	111.205	89.6875	192.965	145.939	154.904	143.924	168.2	102.995	157.203	145.082	133.64	118.735	131.482
SD=20	Sim79	121.873	112.943	127.104	130.653	150.109	121.501	125.933	126.908	99.9838	130.782	158.977	161.551	144.974	178.316	128.112	135.675	145.173	137.246	126.306	131.148	153.569	157.766	160.539	146.008
SD=20	Sim80	125.421	166.818	139.375	125.749	141.874	132.843	122.032	184.692	171.248	74.6277	115.87	133.572	144.656	108.51	137.659	132.909	107.984	108.308	98.7322	143.415	121.385	147.581	148.604	158.003
SD=20	Sim81	118.821	129.302	132.719	151.607	129.783	147.963	148.842	128.56	155.108	131.416	131.548	120.983	136.795	136.078	159.618	169.105	152.646	92.9405	147.683	106.255	142.193	134.227	126.668	136.937
SD=20	Sim82	109.202	139.902	140.01	144.736	160.198	131.815	155.393	147.484	133.148	128.742	128.025	123.062	131.047	120.226	118.786	132.442	151.64	133.125	129.365	142.833	161.348	193.105	169.135	118.427
SD=20	Sim83	161.8	136.879	165.145	110.834	108.887	126.173	123.876	166.678	121.855	149.054	133.264	154.823	149.151	104.554	141.31	129.546	166.118	114.598	130.807	161.261	144.456	154.944	150.698	130.105
SD=20	Sim84	150.477	153.197	76.9399	120.068	119.009	111.925	151.663	146.491	100.251	79.8533	133.474	154.525	160.805	122.322	134.374	91.3022	170.167	143.591	112.589	128.607	111.359	89.8532	110.868	125.314
SD=20	Sim85	124.926	104.047	134.234	123.888	120.879	122.734	142.393	91.3768	156.634	130.454	124.687	138.822	106.757	119.785	154.395	108.951	100.736	162.21	176.954	133.706	129.581	95.8774	134.18	154.508
SD=20	Sim86	141.486	102.62	151.323	177.253	124.835	142.757	143.575	140.689	162.058	136.697	142.62	120.195	111.975	172.209	110.836	93.014	165.234	111.26	124.331	147.795	79.5925	137.731	166.714	153.454
SD=20	Sim87	126.012	135.293	108.786	129.686	113.412	97.1315	146.654	133.206	118.014	107.368	158.461	146.939	135.855	148.885	150.796	131.641	159.257	175.359	136.906	149.413	129.758	123.443	141.117	122.967
SD=20	Sim88	153.586	166.487	147.743	136.741	133.626	129.458	132.939	97.7901	129.762	147.776	169.844	152.422	119.404	138.819	111.6	127.699	142.695	108.771	117.053	123.579	145.712	154.696	118.161	170.932
SD=20	Sim89	162.728	147.19	134.622	127.224	122.993	121.881	116.689	130.822	174.796	122.653	123.597	120.142	154.21	117.533	130.165	106.103	119.978	119.147	152.409	111.235	114.919	109.124	138.294	127.941
SD=20	Sim90	122.338	110.832	133.587	112.836	147.317	142.612	128.817	127.154	126.517	105.874	168.354	121.758	134.11	155.061	151.34	113.938	134.605	143.583	137.233	140.593	107.048	155.07	103.106	142.636
SD=20	Sim91	120.03	134.567	136.955	155.877	151.735	152.412	154.613	140.722	134.972	148.873	97.8545	133.437	95.0762	119.085	115.74	116.494	143.15	156.218	121.729	204.096	63.2476	116.839	152.278	148.346
SD=20	Sim92	152.736	137.754	108.707	130.937	164.335	140.788	126.296	178.801	96.4892	109.268	120.184	136.868	166.577	100.771	83.1364	114.428	133.844	166.878	134.04	109.348	129.616	133.179	138.3	117.355
SD=20	Sim93	132.679	153.221	104.594	86.6578	147.93	134.631	131.301	162.794	130.764	143.034	166.883	117.205	161.491	167.694	146.599	122.293	101.1	142.161	121.585	151.132	129.053	141.493	139.521	135.838
SD=20	Sim94	149.688	122.697	147.015	141.321	138.603	131.64	153.367	152.018	86.7668	163.792	167.876	115.947	116.672	133.643	144.08	119.206	106.338	139.446	134.978	106.929	175.665	151.836	139.006	155.603
SD=20	Sim95	150.274	142.593	107.49	135.066	125.728	127.76	131.765	116.85	183.053	128.569	155.082	130.847	148.486	133.071	133.772	126.11	115.002	136.115	118.957	126.308	119.792	150.28	124.578	131.715
SD=20	Sim96	166.208	133.08	107.818	118.333	123.279	126.904	147.763	87.0562	113.744	110.167	138.931	120.693	98.7078	126.184	120.07	146.392	112.959	93.8634	119.675	125.577	159.285	93.3174	135.82	140.328
SD=20	Sim97	101.769	107.597	137.211	138.045	108.518	134.751	142.295	119.161	118.061	111.453	118.716	130.821	155.009	134.054	125.583	119.478	146.974	112.591	146.865	128.258	106.744	126.109	125.359	156.772
SD=20	Sim98	114.609	161.593	127.526	129.993	158.701	134.515	149.978	163.164	133.138	132.008	146.332	144.784	127.657	144.939	127.428	97.2925	121.611	161.586	133.381	140.831	144.174	164.524	146.447	117.591
SD=20	Sim99	150.75	149.617	117.611	154.257	118.284	140.021	129.47	110.254	101.808	126.768	128.282	116.058	101.828	106.422	130.01	135.853	154.377	120.293	166.4	124.618	128.81	168.548	128.419	124.456

## Sheet: DBP_K16
Result	ID	DBP01	DBP02	DBP03	DBP04	DBP05	DBP06	DBP07	DBP08	DBP09	DBP10	DBP11	DBP12	DBP13	DBP14	DBP15	DBP16
SD=5	Sim00	85.0225	83.4128	86.1507	86.792	84.1294	76.6917	80.7482	77.9076	79.3211	82.7508	80.0545	77.1758	84.0151	84.6267	79.1576	86.445
SD=5	Sim01	89.146	84.8113	88.6219	83.8142	93.0127	87.2722	87.7377	86.4967	96.1656	94.1883	82.9322	84.8283	92.4424	93.0796	95.3473	90.7301
SD=5	Sim02	86.4562	86.7047	85.5163	84.0937	86.6393	87.5476	79.8228	91.6672	84.1229	85.7229	93.8257	89.4064	85.7081	82.7171	80.5693	90.9066
SD=5	Sim03	87.5864	83.5753	86.7348	83.2735	88.0085	85.5029	83.4237	96.1472	88.7956	79.427	91.8206	89.916	90.8975	90.0039	85.477	87.5615
SD=5	Sim04	85.8454	82.8348	89.5064	85.9746	88.7582	87.7511	87.3632	88.9892	87.5208	84.7821	90.994	90.7721	87.8325	88.763	92.1353	94.0777
SD=5	Sim05	84.9378	82.7922	82.5033	90.4278	80.1157	88.8521	84.9715	85.973	81.2905	83.7242	80.6452	85.1429	85.8597	86.1144	81.0756	84.7561
SD=5	Sim06	81.4271	81.2848	76.3624	85.8232	78.5563	84.1027	81.7168	84.6281	77.1659	83.6997	78.1008	85.8712	77.689	83.8783	79.6623	75.1982
SD=5	Sim07	87.8836	77.7461	85.5924	86.9636	86.1072	80.5134	84.3968	84.0844	86.7277	81.9057	88.2528	73.4987	88.1986	82.8066	82.8208	80.8002
SD=5	Sim08	91.1929	84.1371	89.9171	85.7635	87.6134	87.3245	88.0182	89.3522	84.633	88.3077	91.4164	84.2767	84.8664	89.7066	86.8889	91.9868
SD=5	Sim09	91.8364	98.8255	93.4837	84.7174	89.9245	86.9746	86.2619	86.8956	90.1348	84.7645	87.8873	92.2133	91.8987	98.4081	92.2956	87.444
SD=5	Sim10	83.2437	79.7388	86.8011	85.9935	88.4912	89.0051	86.3763	85.3317	91.8245	90.6789	89.5352	89.365	89.4931	86.7864	80.8923	86.4139
SD=5	Sim11	83.0088	83.5018	86.9995	83.6927	84.5863	76.7542	84.8229	87.3868	82.924	82.4046	84.0083	84.7708	88.2294	88.9674	89.1467	84.4418
SD=5	Sim12	81.6317	80.8725	80.7195	84.1955	82.9461	82.6842	85.0276	80.4076	86.5287	77.2755	89.5366	81.914	84.3346	89.583	88.8502	87.249
SD=5	Sim13	84.5775	91.4178	87.387	88.5864	90.9936	83.4244	83.2077	85.4237	86.9361	85.893	91.244	88.6092	82.4107	91.8307	86.7532	91.3238
SD=5	Sim14	83.6807	80.5664	86.1699	83.3137	82.7268	86.0307	81.4162	85.3474	85.2593	82.7242	84.7571	83.6977	85.0955	84.5205	80.8532	78.6138
SD=5	Sim15	80.1159	80.7959	80.9379	78.2953	83.5292	85.0349	90.0427	83.7068	84.3576	80.3043	82.2403	84.3052	77.6209	78.6297	79.0023	81.716
SD=5	Sim16	88.6726	88.8079	85.9207	80.1655	93.2708	85.333	84.1673	90.7606	84.2221	82.3462	93.7831	85.9751	86.582	89.8495	86.3689	86.7017
SD=5	Sim17	72.0716	77.6286	81.5592	84.6326	88.2469	82.0091	88.8133	80.7798	81.4692	81.5793	81.0647	83.1693	81.08	75.5473	79.6597	81.5634
SD=5	Sim18	94.3118	96.4976	80.9264	86.2343	84.4666	86.4799	84.5021	85.3792	91.1527	88.2762	87.2793	91.8119	88.4971	83.1389	86.229	90.4114
SD=5	Sim19	78.4355	87.752	85.8554	80.3009	76.354	82.8182	81.3726	83.2394	82.3005	77.2643	77.6363	78.8204	86.1731	80.8799	80.4816	80.1801
SD=5	Sim20	84.433	78.7123	80.5461	82.6158	82.6029	80.4562	84.1965	77.5057	84.742	81.4263	83.2218	88.2603	80.1763	85.9931	80.5517	82.2189
SD=5	Sim21	81.0398	81.3648	81.294	85.424	87.9938	85.0761	91.1462	84.2918	94.8415	90.4967	78.5693	84.3339	87.7916	86.2437	93.2022	85.5287
SD=5	Sim22	83.5715	89.5227	81.1351	83.7549	76.8736	89.3926	79.1325	87.5793	80.436	86.9533	83.3948	81.1245	86.7733	77.2758	84.8053	78.8689
SD=5	Sim23	74.3979	79.2767	79.7129	81.8561	81.9161	84.7844	74.7789	83.036	83.5964	80.3699	81.7967	79.867	82.2507	75.9114	80.1442	74.7748
SD=5	Sim24	90.1018	84.1523	87.9856	86.0448	88.7279	89.8511	87.0146	89.4767	87.234	87.2206	89.8645	89.5462	85.4022	93.0249	92.999	89.9841
SD=5	Sim25	89.0382	92.2675	91.7709	91.0449	94.827	92.0269	88.1523	85.573	89.1233	84.191	88.2195	86.4974	89.5555	87.4936	86.9006	94.5495
SD=5	Sim26	86.7375	85.2773	87.4836	89.0083	88.9148	88.2071	89.5422	89.3054	86.6992	89.174	90.7883	89.3509	93.4579	82.1581	90.4378	86.9126
SD=5	Sim27	84.4159	84.8052	84.6548	82.5807	82.8076	81.7619	85.3793	83.1498	81.2568	78.8935	80.9583	80.8007	83.1368	82.0562	79.391	81.8157
SD=5	Sim28	85.868	80.7408	83.151	84.571	83.7029	81.324	85.2221	75.6231	74.1019	82.9316	88.8181	80.5208	74.7353	85.5762	80.5467	79.6864
SD=5	Sim29	81.4359	82.9996	87.5231	87.4752	80.0459	80.4251	87.3291	83.4258	89.71	83.5027	81.6955	87.2313	80.9942	81.1129	78.8979	83.0307
SD=5	Sim30	86.645	89.5514	88.3505	91.375	86.566	85.8968	78.7217	86.8335	83.2784	97.9468	87.4176	88.2217	82.8083	86.7943	87.8887	79.4975
SD=5	Sim31	79.9331	82.1532	79.5817	78.8482	82.9243	84.3924	72.7271	79.7321	86.6692	77.8839	84.533	73.3739	85.5051	83.2103	79.0649	78.6308
SD=5	Sim32	86.9604	85.5968	83.3006	81.3326	80.7861	80.9805	83.793	81.8486	77.0556	81.2682	73.6109	83.6115	88.2277	77.3784	82.6704	81.536
SD=5	Sim33	87.4731	89.563	84.2956	81.5031	86.7686	82.0399	89.426	91.0692	83.7213	86.1301	82.4926	78.1805	90.3034	83.2579	90.6202	91.9091
SD=5	Sim34	87.1351	94.3938	91.0064	89.8107	90.0716	83.0132	91.4989	88.0802	85.4396	94.2894	82.5705	87.3157	82.6558	86.872	89.4193	83.7347
SD=5	Sim35	83.2805	77.9111	80.1993	74.505	81.1708	86.284	74.4792	82.6939	75.2679	77.4195	79.9285	87.2736	82.9836	81.2576	74.796	79.9931
SD=5	Sim36	82.7643	88.9686	81.0776	85.6712	90.6325	86.5379	83.4919	79.1089	84.2395	80.7378	90.9815	84.4982	80.7832	80.781	85.1921	82.8857
SD=5	Sim37	86.6782	86.1012	81.8709	85.6698	82.246	77.5346	84.8315	86.3166	83.8215	82.5371	92.9563	87.8121	87.9591	83.9649	86.9713	86.7733
SD=5	Sim38	79.348	77.328	79.32	77.0532	76.4183	78.0526	84.5116	79.7685	78.8394	77.1225	82.9546	84.6888	80.7363	82.1475	83.5198	80.8866
SD=5	Sim39	91.8796	82.7625	84.1029	79.2882	95.4155	93.5994	81.3329	88.9925	88.2924	88.8649	88.5492	83.6895	83.8679	87.419	90.5523	93.6726
SD=5	Sim40	79.9887	86.7262	80.5978	82.1891	80.9785	82.3181	85.5589	81.642	81.616	81.4752	86.4357	89.0142	94.0876	85.8541	85.6431	86.9292
SD=5	Sim41	75.4903	86.6184	84.1565	77.3942	85.5557	79.3022	80.9759	78.1844	84.1079	86.2513	79.4939	78.5443	83.3245	80.1906	84.1763	84.7515
SD=5	Sim42	90.7937	89.1819	83.4365	94.8231	86.2315	86.9734	89.7011	88.868	90.8085	93.61	89.9794	86.358	94.5765	95.0619	87.6373	91.695
SD=5	Sim43	86.6018	90.3397	87.7605	91.6911	86.9042	87.7345	89.0828	89.0495	89.0571	83.0942	85.3227	87.6856	79.5875	92.5055	87.4416	82.5716
SD=5	Sim44	95.1904	87.3535	95.6637	91.3897	89.6606	86.2407	89.7872	89.4618	92.3228	90.6854	92.9056	89.3135	86.8815	82.5879	97.6179	82.5349
SD=5	Sim45	75.5547	82.7746	80.5117	82.1059	79.5221	75.4155	74.0739	84.9736	80.6759	78.5593	80.1679	72.2052	83.7568	81.9758	83.5834	78.4448
SD=5	Sim46	83.0833	86.8045	83.0466	91.0139	89.121	86.1562	86.2795	88.723	85.0967	90.6916	87.3563	89.9782	84.1021	89.922	88.65	88.1893
SD=5	Sim47	85.5501	84.3338	81.6049	83.911	75.0089	78.5792	83.2545	83.2004	80.7657	84.0938	78.4198	82.9408	80.73	80.6921	83.113	84.0616
SD=5	Sim48	91.0227	90.0014	90.5942	92.8843	92.7734	93.9589	92.4418	87.6086	86.0092	89.732	90.8887	92.1678	92.4399	88.7583	89.6274	88.9361
SD=5	Sim49	80.1273	84.3975	78.0353	82.4481	74.1161	81.2024	82.1194	80.8683	87.101	79.4505	72.0294	75.3895	81.3432	79.039	83.5398	76.3888
SD=5	Sim50	78.3527	82.3417	92.7513	86.4629	84.9244	92.2283	83.8784	90.5942	92.8262	86.2327	87.1702	83.7028	85.7453	82.7047	86.8424	81.3831
SD=5	Sim51	79.5537	71.709	78.377	75.7681	82.3899	76.3846	83.2836	81.3029	83.2367	84.1877	84.4949	79.2218	77.4751	71.386	85.5505	83.5868
SD=5	Sim52	80.935	88.6724	85.1156	86.8175	89.8245	86.3026	87.0395	84.7145	87.9621	96.3347	85.3506	88.7044	91.6985	84.7624	90.9419	85.1405
SD=5	Sim53	87.0439	85.5898	87.3751	85.7313	83.2314	90.2052	89.172	91.1511	88.9335	83.7668	91.5877	88.9333	92.6661	86.8196	93.5405	95.8348
SD=5	Sim54	80.1913	93.5647	87.6904	83.5902	80.5873	84.1404	83.3256	87.3719	81.0946	90.7577	85.3629	82.9053	89.7541	84.896	82.6224	84.5936
SD=5	Sim55	90.2297	93.0546	94.1309	92.5303	89.7827	95.0097	92.8632	93.3285	80.3121	89.3051	88.5329	86.4439	88.6558	89.4662	88.0294	87.8164
SD=5	Sim56	89.6896	88.7453	89.356	90.5923	95.6977	86.7662	87.0073	91.3743	95.555	89.8545	88.733	82.6688	91.8173	83.2675	89.474	86.0326
SD=5	Sim57	85.9997	90.9327	85.9285	87.5232	86.4246	85.3291	79.4868	87.6573	93.3065	86.693	92.7012	91.9212	87.7392	89.0803	86.7368	89.9278
SD=5	Sim58	80.7808	84.6672	74.79	73.8989	82.5238	75.3377	82.6597	82.4707	78.8188	81.1347	75.9345	81.4479	76.9201	74.1239	77.4636	82.5828
SD=5	Sim59	81.6299	85.8528	77.7701	83.9055	78.2597	83.0696	85.8229	90.5087	75.8873	84.594	88.7005	86.137	79.1936	82.4009	82.0963	83.6885
SD=5	Sim60	89.164	88.4485	84.0491	87.1478	92.8144	79.8818	92.2454	91.5902	86.4824	92.7695	86.6567	91.0082	89.4926	85.3134	83.7427	89.7016
SD=5	Sim61	81.9996	87.3797	88.3	87.2685	88.5732	81.523	88.1018	84.3822	91.2817	83.788	85.4955	94.1625	93.076	86.6151	88.2782	85.7719
SD=5	Sim62	88.3552	91.3831	86.0945	90.2712	91.9033	81.2238	87.9781	86.2065	89.9271	87.8237	91.1294	90.1771	91.6374	87.0606	83.5765	86.7358
SD=5	Sim63	91.2647	89.8883	86.1635	94.5303	90.6398	87.2619	95.9155	92.7946	91.302	88.7408	88.2962	88.823	88.8777	93.1049	87.0764	90.8151
SD=5	Sim64	80.1029	86.6266	87.3684	85.1154	85.8231	82.8168	83.8474	85.0463	88.1782	82.9554	86.7673	87.0152	87.2991	86.475	88.8947	87.7262
SD=5	Sim65	86.3173	85.1146	87.01	91.578	92.3709	93.6747	85.7477	85.9586	92.4819	86.2986	90.1517	83.8033	89.4502	92.7414	88.513	93.5541
SD=5	Sim66	80.0561	88.9453	92.2699	86.4621	82.5442	85.0891	89.3348	83.3151	88.2962	87.0436	93.5361	86.4812	87.3889	86.4625	84.1317	86.6828
SD=5	Sim67	80.5574	82.9058	82.5891	82.901	81.9638	81.189	79.5211	78.3883	76.9465	81.8223	77.3002	76.4047	82.8184	83.2211	79.0608	81.2452
SD=5	Sim68	88.44	87.1819	85.7989	87.9093	82.827	90.3428	87.6495	92.0856	79.1695	90.1964	89.4076	89.4721	85.3432	86.048	87.8443	86.7021
SD=5	Sim69	87.1891	87.1755	86.2009	89.6443	87.808	79.6252	90.214	83.7592	86.851	87.4239	82.5212	85.917	98.3909	85.7599	82.755	92.5492
SD=5	Sim70	80.0314	80.6262	84.0227	81.2582	80.6065	81.6161	84.7493	82.027	86.1742	81.9805	85.2168	83.6908	81.6566	78.3396	72.9482	78.7329
SD=5	Sim71	86.1246	83.6131	78.6344	86.5314	92.6082	85.8738	88.2683	89.0356	85.0029	85.2274	85.813	89.8643	85.3744	90.4647	85.4617	90.0731
SD=5	Sim72	95.866	91.0172	88.8152	89.6152	85.1072	90.6757	89.5954	87.4188	83.8738	92.1213	80.5111	84.2793	88.5577	82.2393	82.5481	88.2188
SD=5	Sim73	73.1809	77.7357	81.179	75.2535	76.3497	82.8831	80.357	92.4085	80.7735	85.974	84.3451	78.7114	81.2226	86.9516	83.9554	79.1181
SD=5	Sim74	82.3967	91.4154	84.0989	87.8685	89.8058	82.6533	88.2575	83.884	85.9145	79.7676	85.8406	88.393	81.4377	85.7643	84.5902	86.5623
SD=5	Sim75	74.6096	78.4004	83.0317	78.5311	84.1065	80.1501	85.1833	80.1041	79.8639	82.9657	81.7136	84.1742	78.6937	79.3568	77.5146	72.3907
SD=5	Sim76	84.0801	82.7607	81.6166	85.3072	81.757	79.8458	86.3976	80.8432	81.3789	81.1341	79.8352	76.3216	82.4991	81.8332	74.7785	75.3546
SD=5	Sim77	89.2598	87.0925	91.758	79.3393	87.1469	91.6507	91.5715	88.4091	84.9775	89.2183	92.9267	89.7823	88.5808	82.5677	86.7814	89.2363
SD=5	Sim78	88.0718	83.3901	84.7447	86.245	86.5797	79.5963	87.9612	82.4083	86.4724	82.723	86.7707	90.2648	84.983	88.0019	82.8253	87.633
SD=5	Sim79	73.4811	80.8114	81.3009	81.8592	79.1874	84.8746	85.1977	79.7173	86.6418	80.4225	77.0674	81.8649	80.97	81.9106	79.8438	75.3311
SD=5	Sim80	80.7806	80.8694	85.8283	84.1785	83.5267	77.0163	83.61	84.0147	75.8888	88.7142	82.8459	80.1204	81.6581	83.6884	79.5982	80.6129
SD=5	Sim81	89.2889	80.1749	83.4782	89.9507	82.6963	80.429	86.2777	91.3923	85.7211	88.9629	87.3451	88.237	84.8703	78.0236	91.0501	86.0737
SD=5	Sim82	89.5633	85.6364	87.2095	88.0969	80.5026	85.1484	85.5005	85.7135	88.3727	88.8392	91.6682	87.3296	85.3034	86.2492	85.2752	86.4893
SD=5	Sim83	91.1287	88.301	87.2973	86.8182	77.6001	84.0723	86.6707	80.0798	90.3235	84.9319	84.8122	92.8089	80.6935	89.0876	89.7525	89.8549
SD=5	Sim84	79.9401	88.3309	86.7093	77.7792	76.7516	83.7136	80.1524	81.8905	83.3823	88.0443	87.3312	85.1111	84.0871	86.3661	78.78	81.6602
SD=5	Sim85	81.9035	78.3615	85.9004	81.4877	79.2329	80.5655	82.4006	79.9244	83.1265	87.6706	88.1107	83.1941	74.123	84.0419	78.7393	84.144
SD=5	Sim86	84.3329	74.8284	84.3042	86.2173	85.5532	85.9956	79.0255	84.1328	85.6344	82.817	85.2956	80.8363	84.9674	89.6518	78.7472	74.6455
SD=5	Sim87	79.6699	85.317	88.3084	83.0736	77.9422	82.0784	82.5208	82.6726	81.5473	82.0358	80.1247	83.3119	77.3603	82.6367	78.0621	83.048
SD=5	Sim88	83.5795	81.4417	87.4289	87.5317	80.25	82.7077	82.2116	85.7642	76.4329	87.2737	84.0344	80.1442	75.6018	85.8676	83.3879	81.56
SD=5	Sim89	81.2284	83.3761	91.4634	84.1061	89.2314	85.6171	89.4516	84.6145	86.5943	81.3931	86.2173	83.4637	88.594	82.5899	87.5373	85.9882
SD=5	Sim90	92.2399	86.4025	81.2222	89.3917	89.7173	90.5055	87.4054	82.5789	88.1813	87.0244	94.8199	84.0578	85.6124	83.6016	86.0022	90.8895
SD=5	Sim91	82.7557	82.5769	81.4244	78.728	80.2646	77.5443	83.2359	83.3476	77.6944	77.3232	85.039	80.6946	91.3874	83.0939	80.2626	81.1034
SD=5	Sim92	91.0665	88.1107	87.4583	89.8628	96.9495	92.3123	94.7587	90.5449	97.1065	84.4185	91.6147	88.0778	90.1871	87.239	89.7371	89.094
SD=5	Sim93	87.2933	82.7335	87.1252	88.8764	91.3847	90.2727	94.2499	84.2077	90.4538	89.7765	86.3934	89.0298	86.2406	83.173	84.5349	91.8981
SD=5	Sim94	78.8511	85.2366	86.2292	84.762	81.3415	79.335	84.6099	80.1575	87.3005	79.7383	78.1811	80.3133	76.3767	86.4548	82.1742	77.859
SD=5	Sim95	88.1334	83.1555	87.6656	86.3573	81.9173	83.6473	84.0136	84.1542	85.9641	84.6001	83.2522	86.001	89.54	92.0582	85.1564	84.0475
SD=5	Sim96	93.4306	89.6166	84.6648	84.5081	91.288	88.1111	88.3786	94.6952	86.4811	90.6429	89.7412	92.7897	90.4069	85.9201	89.0194	87.9299
SD=5	Sim97	81.6245	85.5153	88.105	82.4626	79.1594	78.2462	87.7675	81.4975	76.3304	81.321	82.5413	88.1443	83.7876	91.9592	83.2257	87.7293
SD=5	Sim98	81.2043	78.2253	79.2266	86.5715	84.5091	87.2437	78.0024	83.3825	84.527	72.0554	81.2533	83.2927	80.4889	86.3669	84.44	81.3505
SD=5	Sim99	81.1959	90.4722	76.6083	86.2552	81.2153	86.5935	89.3483	89.6468	82.4707	84.5193	87.9444	79.4645	80.406	82.6285	89.5923	84.6765
Result	ID	DBP01	DBP02	DBP03	DBP04	DBP05	DBP06	DBP07	DBP08	DBP09	DBP10	DBP11	DBP12	DBP13	DBP14	DBP15	DBP16
SD=10	Sim00	77.7502	72.8075	81.4006	96.4383	86.66	74.5985	79.5753	79.5632	60.7986	83.1114	82.8294	80.9328	78.1035	72.772	73.3404	83.3342
SD=10	Sim01	80.3416	98.7648	91.4883	103.455	90.8341	91.978	83.9616	82.0168	92.7434	84.8534	98.5174	78.9298	92.6631	94.2854	82.9171	84.7168
SD=10	Sim02	85.1127	87.4109	78.1614	87.6809	83.7956	86.8906	87.7404	61.7225	86.9529	87.7681	87.3734	83.6143	89.5222	78.2725	81.9669	83.7942
SD=10	Sim03	89.1812	87.5258	98.5866	86.7901	94.1636	91.9929	84.2635	81.2856	100.625	81.778	89.6763	80.9649	75.0271	85.634	94.2946	92.9917
SD=10	Sim04	93.2643	87.9659	97.8599	99.9583	88.73	79.9177	84.8523	86.0722	86.5126	88.5074	85.5017	81.131	79.9403	77.6862	97.5822	100.058
SD=10	Sim05	93.3555	95.4112	91.3726	95.1094	80.0268	89.0662	84.8466	88.7599	86.9151	99.8302	78.3909	82.7182	86.4242	69.1926	88.4449	102.713
SD=10	Sim06	75.0916	77.4583	81.1385	60.8472	75.6514	74.9028	87.4862	84.8263	70.1237	83.5533	79.9255	74.8275	93.6154	84.8695	81.8184	86.8543
SD=10	Sim07	79.4954	93.3426	78.3525	90.7568	103.058	74.432	83.9208	91.7288	86.4575	84.1026	85.1635	87.1205	79.5654	91.8851	86.7784	78.7737
SD=10	Sim08	74.6644	83.0266	93.9323	79.09	88.3631	87.2667	85.036	83.1678	85.665	96.7834	85.4475	83.7991	85.0747	90.0242	82.5663	93.1516
SD=10	Sim09	82.097	88.2889	101.132	86.6435	97.8684	90.9001	86.6293	92.8776	94.1889	89.1214	100.118	86.4529	83.2866	90.1032	92.0418	90.6715
SD=10	Sim10	93.0387	82.116	85.032	91.2808	99.307	93.8336	81.5122	95.4855	108.52	86.2545	86.3383	78.4334	100.784	84.9735	85.3675	96.5637
SD=10	Sim11	89.4056	73.2528	90.506	93.0333	90.2167	90.2827	80.4688	76.2478	72.1787	78.5054	90.6004	80.1214	87.6785	97.4227	94.8793	85.7742
SD=10	Sim12	77.4274	94.3652	77.373	95.5545	89.6758	78.6474	87.2155	90.3485	84.7951	76.0408	82.9083	87.7988	88.4094	82.4868	76.563	75.0824
SD=10	Sim13	79.7622	79.1564	83.3201	65.7639	79.3864	85.4176	91.296	90.6523	85.7891	101.129	90.0666	93.6474	79.4046	83.7037	90.7891	87.554
SD=10	Sim14	84.0663	84.3606	74.6818	71.207	83.1855	93.5814	81.2511	76.8632	78.2809	90.3639	82.4596	78.9912	84.9974	70.9116	89.8576	61.2941
SD=10	Sim15	90.6647	84.3214	78.5694	86.5924	86.3817	78.7984	88.3279	70.4744	76.686	65.9497	69.2497	80.313	84.3679	76.4615	83.6323	67.7303
SD=10	Sim16	93.2529	84.3286	83.3198	78.8487	95.034	86.8251	89.7397	78.0354	90.8656	71.31	96.967	83.1559	86.2803	78.9785	87.9475	86.0389
SD=10	Sim17	89.6032	84.0981	77.743	85.8644	82.614	72.5131	79.7368	78.7486	82.1229	82.0292	71.7281	81.3735	85.5417	82.3954	93.2472	84.2646
SD=10	Sim18	86.1827	81.798	89.8422	85.9584	92.9078	89.9035	94.8054	92.1425	85.4498	89.0883	84.9339	105.109	90.6003	84.1246	88.8145	90.9134
SD=10	Sim19	85.7404	82.2085	80.6919	78.3585	87.8967	68.9642	79.3556	69.8291	76.4724	84.3581	72.5043	91.4775	82.0165	77.3488	76.5729	91.292
SD=10	Sim20	76.7208	93.459	76.5515	86.6153	70.7634	85.049	79.9543	81.6756	71.9994	85.8658	85.718	83.5162	70.2189	78.7473	82.4684	82.6988
SD=10	Sim21	95.3359	81.5359	82.788	89.3526	78.2365	98.5859	74.1349	77.5846	83.1568	84.9698	89.7428	87.3543	81.4788	86.207	80.9544	97.0503
SD=10	Sim22	80.8958	76.3482	91.4808	82.4548	90.2133	74.1213	93.7417	82.1918	92.3477	94.6037	77.9308	84.3052	79.2069	81.0613	85.382	83.4895
SD=10	Sim23	74.0022	72.093	83.7432	69.1278	91.088	66.9264	75.3811	85.394	76.3062	71.2854	88.3667	81.6697	85.3831	82.1284	81.944	68.0217
SD=10	Sim24	87.9467	92.8996	89.3303	88.8486	94.1677	90.0008	85.8411	91.0877	88.7791	88.2839	97.9283	86.69	89.091	82.8438	99.9553	70.3603
SD=10	Sim25	90.0601	93.6996	84.9658	96.6605	99.3327	82.1698	84.5414	81.5456	93.3777	88.913	92.1668	91.5362	96.8543	99.2962	88.4991	84.6868
SD=10	Sim26	86.033	86.9624	97.2216	78.5021	88.5381	81.9834	90.0149	85.1088	94.726	102.745	81.86	68.4591	93.2809	86.1005	81.9316	82.7077
SD=10	Sim27	77.9344	74.6949	77.9495	91.7695	94.3809	74.2688	74.8072	83.4624	81.9753	80.878	88.9812	82.4602	84.7093	82.3587	75.5298	75.1303
SD=10	Sim28	91.9338	81.6554	91.2054	90.5034	89.2878	94.7144	81.4341	67.6805	82.3208	82.0131	89.3047	83.4712	78.3091	85.5894	85.5001	81.5234
SD=10	Sim29	89.1063	82.9825	78.275	79.7361	84.7003	82.1163	81.9236	77.0917	93.0572	97.6456	78.9097	82.9647	85.9569	80.7845	92.5046	88.006
SD=10	Sim30	75.1909	86.8537	93.98	87.4774	84.1368	97.8497	85.9001	75.0068	83.789	85.0665	99.3114	83.8981	92.4362	84.5235	78.1017	75.8671
SD=10	Sim31	93.7086	78.2055	80.5445	76.8005	73.2676	80.6983	75.3139	74.4895	81.846	70.7135	82.9489	70.0625	88.9963	96.4772	72.5974	81.995
SD=10	Sim32	96.56	80.1593	75.667	71.9871	70.0074	76.7559	86.2058	69.6234	79.0136	75.8788	77.3185	78.9827	86.9028	79.0624	75.5122	76.204
SD=10	Sim33	86.0166	88.629	87.2044	79.4121	86.2571	90.0643	94.9279	97.9776	85.6306	77.6937	101.459	77.0097	81.7832	85.4986	99.2725	93.2728
SD=10	Sim34	91.6497	82.9255	91.6085	84.9596	105.895	89.9946	93.1853	98.0624	81.5982	75.9791	91.5923	82.5386	78.5913	90.5293	93.2352	104.664
SD=10	Sim35	85.0025	83.1469	78.5195	87.2367	61.6667	71.5835	84.0579	86.8378	74.4907	81.241	81.3011	86.1302	76.5657	76.8933	76.7088	86.8563
SD=10	Sim36	85.8809	95.1712	84.5487	87.0765	89.7809	79.7923	81.5036	79.0561	86.1895	79.1557	86.2739	70.8354	82.0192	87.6619	81.5726	84.1864
SD=10	Sim37	88.2515	73.4753	92.3207	83.0434	78.9781	78.8632	91.4847	86.1979	97.3571	84.3062	89.1939	82.6038	85.8125	85.776	90.5273	82.7532
SD=10	Sim38	84.9569	76.0832	87.5846	74.8943	75.9464	89.4464	85.1321	78.7298	84.8024	89.598	72.6546	67.5961	80.1989	88.4094	87.8896	82.5536
SD=10	Sim39	95.1279	78.4646	93.3073	87.1478	95.1328	77.2371	92.418	79.584	78.4735	80.2683	93.202	100.42	96.7415	99.7134	97.6633	74.3177
SD=10	Sim40	97.8627	94.2525	84.17	97.4621	97.4239	75.7929	83.8674	88.5662	99.2786	89.598	83.7892	92.6791	86.4274	74.7247	84.4528	83.0391
SD=10	Sim41	93.1672	81.5487	78.2647	78.9101	80.4361	62.5648	83.6355	89.3833	77.3969	82.1413	81.5865	94.2713	78.2936	79.3099	83.819	82.8205
SD=10	Sim42	89.7427	82.823	93.5448	88.5674	87.2812	83.323	81.812	97.164	83.9501	92.5259	94.9336	91.5767	83.8683	89.499	91.7099	78.7422
SD=10	Sim43	90.2477	96.8218	98.6824	85.9606	82.7869	86.1095	82.3053	76.2416	89.5266	84.2449	87.2922	92.0396	93.805	86.6297	93.6025	85.3372
SD=10	Sim44	94.0798	77.7847	99.2047	93.0856	92.2977	92.5842	90.4598	98.7843	77.7359	86.892	93.2388	95.3624	76.5821	90.8756	87.0286	98.6168
SD=10	Sim45	71.5418	81.7652	82.6134	85.5275	89.6743	78.3808	77.8406	79.8991	81.1037	83.0309	80.7646	87.9866	67.3537	74.1476	86.1988	76.7417
SD=10	Sim46	89.9813	75.9017	83.9643	86.3094	87.7765	91.8818	97.758	95.8982	82.556	85.4898	90.2706	78.0229	85.5883	83.3349	91.2581	95.5129
SD=10	Sim47	77.5646	79.0182	85.7232	88.2628	74.9918	76.749	85.2385	81.8813	66.9145	86.2721	85.8493	82.1288	85.6951	84.4072	66.7629	73.8567
SD=10	Sim48	86.1989	94.5235	99.7802	73.2333	86.624	103.44	98.3595	77.1957	90.1475	88.6326	96.1132	83.6191	98.2644	88.5367	92.804	99.8678
SD=10	Sim49	84.494	93.6806	95.7549	80.132	84.4236	88.0264	89.913	87.4707	79.518	84.7183	86.0801	86.9692	80.1282	78.5601	78.7014	84.5368
SD=10	Sim50	93.9275	96.5485	88.2818	95.5178	89.5623	88.6579	77.2899	83.7845	87.4481	87.4689	93.546	82.9231	81.4845	92.9485	91.8294	88.4169
SD=10	Sim51	97.2125	77.9118	72.5571	69.7558	84.4342	83.8466	85.5072	73.8819	72.735	81.5181	77.4864	88.5143	94.249	81.2731	75.9058	76.0436
SD=10	Sim52	83.0589	78.8971	93.7124	78.4492	87.9668	99.8788	90.0865	106.263	90.8053	96.9205	79.319	87.9643	86.5552	83.8363	81.5278	83.9965
SD=10	Sim53	87.3897	95.502	96.5967	83.5651	84.3167	104.229	93.3681	91.5912	79.83	80.7687	93.1228	85.7088	86.4192	89.565	94.309	85.1329
SD=10	Sim54	88.4329	73.7089	85.3453	83.8838	83.7767	81.4925	84.9539	81.0706	83.4172	84.6465	86.4776	95.4855	100.044	88.7269	77.758	81.0014
SD=10	Sim55	90.569	92.5291	93.9728	85.2663	80.5568	83.8512	89.6315	99.4029	92.5404	83.2117	94.273	91.2262	93.306	100.987	94.5927	85.6633
SD=10	Sim56	80.06	98.9675	79.8139	102.823	79.3009	94.5286	85.7556	81.2909	85.6357	83.1461	87.046	87.8855	81.6406	94.1707	95.4798	87.1567
SD=10	Sim57	93.6507	88.7042	85.6429	98.0942	93.7633	78.5158	82.1588	93.2317	93.5255	89.5969	88.4433	99.3748	76.1909	108.632	89.4379	90.096
SD=10	Sim58	92.0091	82.9647	84.5247	91.5532	78.0646	74.6588	75.1184	85.2263	80.6982	78.7472	78.166	77.0384	68.0905	89.0367	78.2392	86.5238
SD=10	Sim59	85.9805	89.3633	96.0407	89.3151	94.9653	84.7786	76.9248	94.455	81.066	67.2994	82.1418	74.5696	75.9294	75.2863	95.047	62.7719
SD=10	Sim60	88.1611	96.9282	80.776	92.0735	90.9012	79.8838	85.673	92.5694	92.0765	89.3366	93.2564	91.0078	93.1941	83.7564	73.3835	103.677
SD=10	Sim61	83.0378	94.305	77.2264	83.6159	91.3826	86.3268	87.0187	80.5452	84.5855	86.1599	99.0124	87.6969	89.712	89.6351	84.3893	78.3532
SD=10	Sim62	80.6074	78.6325	77.6976	93.5211	93.3284	85.0104	89.9877	101.125	82.6453	81.1553	84.4108	77.6472	85.3838	88.4013	81.3996	87.7434
SD=10	Sim63	89.304	90.0116	84.7053	85.5971	96.8374	84.7648	92.1294	91.9379	87.126	81.5626	92.7192	95.1963	85.8228	90.1792	89.6773	85.3185
SD=10	Sim64	83.1376	84.7984	87.0058	87.3944	77.9607	83.2392	75.6294	88.2248	91.0888	81.0543	84.532	83.4043	93.675	83.7573	96.3807	88.0889
SD=10	Sim65	96.6235	83.0497	92.8756	91.2215	110.562	97.028	91.316	90.8516	92.861	82.6829	83.4727	87.5954	85.0434	90.6371	99.492	89.386
SD=10	Sim66	82.8276	94.519	88.022	92.9412	91.7404	84.5972	78.0956	86.3246	87.531	90.132	81.7286	84.1474	98.3171	89.4565	97.7956	94.1516
SD=10	Sim67	81.5394	68.0146	90.3208	83.0141	78.1407	76.9463	82.6099	81.0804	82.0809	94.3003	77.0951	75.7573	76.9137	81.6247	82.2402	75.958
SD=10	Sim68	78.1937	74.8917	86.9841	77.2513	78.4167	87.4442	75.8354	71.3601	90.6742	80.9418	87.6553	84.6742	80.1112	85.4074	74.199	70.2988
SD=10	Sim69	87.8849	89.1615	90.6458	82.5916	85.9956	93.0126	89.2523	90.7142	94.4518	79.7288	89.6428	86.0563	79.9213	97.7217	84.3049	89.3883
SD=10	Sim70	83.7621	90.7457	87.9172	78.6834	92.1683	88.5501	95.196	76.1166	89.9613	91.555	81.4984	82.1206	78.5003	77.6249	88.1342	83.0435
SD=10	Sim71	79.3193	89.4428	81.6059	98.2464	90.8594	87.6745	82.7811	87.8626	82.2313	76.5736	90.2434	92.6352	91.1819	77.0558	83.9896	79.6611
SD=10	Sim72	89.0038	107.328	91.9767	89.9928	91.5758	93.3267	86.7421	88.0753	99.3028	78.7634	93.5257	86.375	97.8195	88.5278	86.7439	90.2897
SD=10	Sim73	73.6474	85.759	73.5541	76.5668	87.1832	80.443	73.3835	76.9063	81.4231	68.6526	78.366	91.5573	83.2206	82.554	77.4569	82.0065
SD=10	Sim74	90.8097	78.4044	80.204	87.5516	78.6988	83.3867	89.566	84.7678	74.0845	93.147	95.211	93.4103	77.3115	83.0889	97.5289	93.3574
SD=10	Sim75	75.8678	71.1537	74.8517	84.6302	92.1769	84.3849	63.9527	76.4199	92.3604	76.4648	89.9219	78.2441	72.7503	87.7221	75.4576	85.9609
SD=10	Sim76	82.0205	79.5616	88.8219	82.4163	82.7997	78.4943	85.6048	72.967	67.4574	72.3139	72.4085	97.0335	68.1422	76.6623	70.6088	81.3474
SD=10	Sim77	77.1383	95.7913	90.4743	91.4909	86.9774	87.8733	94.5736	97.2643	87.1015	92.9476	99.9961	91.2967	85.593	88.0661	90.4734	76.77
SD=10	Sim78	74.3855	84.15	81.7651	81.1855	84.6585	90.8671	89.6501	87.1507	77.1681	66.5653	91.8156	86.1898	92.5985	74.9314	90.3468	80.5686
SD=10	Sim79	97.9538	81.2629	83.2606	80.5106	82.1845	75.9874	73.8532	59.2667	85.5005	82.0959	92.3609	69.2726	82.6885	79.3475	99.881	83.7889
SD=10	Sim80	77.0077	87.5455	77.9905	77.1421	80.3489	79.7843	77.9425	81.9527	89.6948	81.9272	80.881	82.606	79.582	82.6616	75.1017	86.0772
SD=10	Sim81	80.3578	77.3491	83.1765	84.4771	81.2358	68.4841	69.1569	87.5234	83.3893	86.9855	94.0414	87.7583	86.3203	89.4194	97.4166	86.7792
SD=10	Sim82	97.9597	86.2636	78.459	86.1996	86.5794	84.9677	79.524	74.4766	85.131	80.1766	79.6129	66.2106	84.0469	87.1999	95.114	86.8795
SD=10	Sim83	82.7278	97.5693	81.4003	101.761	91.7116	71.6052	73.5737	89.6827	83.2464	99.3806	83.2732	89.2691	85.0792	87.8944	82.7859	101.321
SD=10	Sim84	87.4762	94.056	81.8618	77.9216	85.0414	90.4745	69.8807	84.4187	82.4186	87.3671	84.3035	72.4931	69.89	91.9651	85.0355	76.9742
SD=10	Sim85	82.5047	77.7813	93.8012	93.4295	80.7148	65.9276	96.9087	73.4667	87.9746	82.3016	75.5104	83.1313	93.0608	78.4931	83.2132	78.9417
SD=10	Sim86	81.0957	70.8462	82.3787	90.9193	84.1441	90.1001	79.9979	75.6859	81.9403	77.456	71.8567	88.5587	84.3912	87.0805	78.9207	91.7365
SD=10	Sim87	73.6052	77.3538	78.8142	74.6766	80.3351	83.8436	93.2162	96.477	80.3607	92.1575	90.1277	70.3548	81.9344	82.5194	81.4137	73.9264
SD=10	Sim88	77.2686	85.2143	87.6017	75.9338	86.7019	88.8775	84.9356	68.6722	81.1451	70.6692	68.4034	90.1502	80.7988	80.7815	76.9853	80.0513
SD=10	Sim89	76.8177	76.5808	97.9608	87.0075	81.2321	72.979	88.6171	89.0496	89.578	79.0141	86.9462	82.5749	86.5481	76.9327	83.7359	74.8834
SD=10	Sim90	90.5507	85.6446	82.6004	80.8935	86.2648	82.4569	79.5451	85.2812	72.2112	94.6477	101.049	84.4336	84.3416	76.881	79.8837	85.4252
SD=10	Sim91	76.0546	80.021	84.2177	80.8563	94.0059	68.2268	83.9661	71.0892	80.0268	92.2583	90.1854	62.525	76.9437	81.458	92.8147	70.6688
SD=10	Sim92	84.0229	93.7909	85.4365	90.643	88.0136	100.971	98.4703	81.9646	83.9521	90.6641	92.2786	77.6586	94.4243	93.2596	76.8201	103.987
SD=10	Sim93	89.5768	89.6827	89.3306	83.7457	79.4549	90.3346	76.3315	105.906	85.8558	85.4134	83.6106	89.6093	97.32	88.2943	83.1288	88.223
SD=10	Sim94	82.2399	85.6102	89.2266	86.0889	82.8026	84.065	84.5087	86.2178	79.1078	81.5395	91.9782	88.7877	89.4485	84.7914	84.7841	90.5014
SD=10	Sim95	80.7674	88.2508	86.133	85.1128	94.5296	90.193	94.9359	69.4115	93.7126	82.233	86.9741	98.3652	95.6116	94.5055	82.6176	96.8507
SD=10	Sim96	90.5192	90.5859	85.7259	91.6383	77.8879	86.5615	88.3772	75.0471	90.4248	84.8411	90.089	90.9944	91.7873	89.6775	75.5547	90.9114
SD=10	Sim97	91.4093	78.5037	88.5973	80.5133	79.7895	82.4159	85.888	78.9146	84.7121	81.5773	75.3346	76.8712	77.2513	87.8484	89.0897	93.6736
SD=10	Sim98	76.102	78.7526	79.5345	72.0265	78.6786	84.8626	89.0119	68.1342	73.2235	81.1489	82.1611	83.8717	69.7796	83.6353	83.9756	80.4527
SD=10	Sim99	76.2039	87.3921	77.1046	82.1849	85.5258	81.6893	92.1515	88.2102	83.8354	73.9148	89.4596	84.9443	89.1965	84.9704	86.068	89.7949
Result	ID	DBP01	DBP02	DBP03	DBP04	DBP05	DBP06	DBP07	DBP08	DBP09	DBP10	DBP11	DBP12	DBP13	DBP14	DBP15	DBP16
SD=15	Sim00	81.8709	99.1468	61.7548	83.1823	80.53	59.287	76.9643	86.1516	84.6581	77.1467	83.7507	77.8864	77.27	77.5697	83.7998	73.0029
SD=15	Sim01	83.9087	69.3258	81.0123	83.6719	83.359	123.345	66.7178	107.943	95.1391	100.386	82.2417	87.6149	88.4687	83.2472	106.414	86.169
SD=15	Sim02	104.392	86.3182	98.4327	67.5571	84.9511	83.3018	67.3691	70.7525	85.3386	88.5258	70.4217	85.3647	76.7704	94.9052	70.3322	68.5762
SD=15	Sim03	89.2012	104.893	89.6955	88.6992	64.6519	73.7487	86.0078	88.1202	81.2667	88.971	107.575	85.0434	85.1493	61.9739	71.4675	87.4761
SD=15	Sim04	74.254	104.022	94.9777	64.056	89.7869	92.2912	87.025	104.872	92.0505	81.5057	67.163	80.7108	74.3429	85.4789	83.0477	83.4058
SD=15	Sim05	97.8026	96.1393	73.7016	80.6107	78.9147	82.2365	94.8197	85.3097	102.095	91.5662	71.1482	97.3137	111.798	79.0358	92.127	91.7544
SD=15	Sim06	72.0586	109.451	91.168	77.1958	99.3728	103.368	80.2783	78.6067	69.5681	52.4993	69.2897	90.4233	80.2824	87.0227	82.1318	82.9174
SD=15	Sim07	81.0482	84.3575	86.4187	100.61	79.3105	72.9087	91.9774	84.6616	91.4914	78.5167	86.516	90.4765	97.5851	81.0125	80.8968	92.9695
SD=15	Sim08	96.0695	68.2333	77.9548	80.5207	82.7654	76.8991	81.4765	102.195	104.753	98.2871	93.7413	71.6954	82.2139	73.3036	80.8162	86.1924
SD=15	Sim09	90.868	84.1775	106.165	80.6201	103.518	81.9456	85.6881	104.903	100.679	79.1054	86.3431	78.1258	87.7238	116.063	95.7618	91.662
SD=15	Sim10	87.9026	62.4039	64.1074	78.1485	99.6845	74.4303	90.8187	90.718	105.189	80.9431	81.2567	92.7658	78.0813	82.6079	94.2581	96.1374
SD=15	Sim11	86.5025	75.2053	98.9041	105.641	85.5695	75.5157	91.3525	91.3007	82.7105	72.2079	60.833	75.2772	93.4724	65.8275	72.8172	89.0621
SD=15	Sim12	78.1005	83.1292	71.6448	100.385	76.0988	98.338	74.6569	93.0557	87.4935	87.9285	72.7098	80.044	82.1	95.5182	91.8179	88.2344
SD=15	Sim13	74.5553	105.467	80.5697	100.564	83.5806	62.1937	106.349	99.7367	90.45	95.9297	91.49	85.9059	91.3229	79.9259	92.1806	88.0643
SD=15	Sim14	67.2086	78.0683	89.9785	90.3668	69.9792	57.235	85.7455	75.6898	73.1151	81.9955	77.8762	71.9181	66.5195	76.9356	69.9004	82.0974
SD=15	Sim15	78.4178	84.3416	77.1497	86.1471	76.8207	66.504	78.6604	81.7325	60.6585	78.3769	75.2618	69.922	84.9438	88.2447	79.1998	64.7889
SD=15	Sim16	88.7693	84.5458	70.2114	83.5863	102.29	92.7412	98.1769	75.7136	71.3792	77.6272	86.9485	95.7857	74.2904	87.8744	72.793	96.1527
SD=15	Sim17	70.2754	77.2969	81.4655	82.7897	67.3423	80.6944	81.8281	75.357	77.5971	100.578	103.274	92.7039	73.6962	94.9476	95.0381	78.3899
SD=15	Sim18	119.184	99.8908	86.8224	80.8287	85.9937	101.317	100.87	88.9555	80.6547	105.422	105.784	86.778	96.054	91.3827	73.2854	99.2083
SD=15	Sim19	93.3786	77.1846	65.2459	80.8004	68.222	90.944	89.753	90.6637	91.1732	101.658	66.6137	100.511	62.0435	96.4586	74.1904	84.8375
SD=15	Sim20	69.8775	96.778	106.516	68.0761	76.8381	78.4359	81.2804	98.2706	69.2757	99.6799	60.9768	89.3589	73.787	81.4526	85.8532	100.671
SD=15	Sim21	71.9742	118.194	83.5341	82.2251	89.3986	75.327	87.2699	89.6691	90.9457	76.095	71.598	63.0499	79.3588	83.4656	96.794	86.9811
SD=15	Sim22	88.982	67.1037	76.8336	107.388	72.7208	86.2376	83.4203	68.6791	87.6575	73.4719	85.9739	69.0354	86.2099	86.0306	80.2738	92.4069
SD=15	Sim23	92.7733	84.5133	73.7459	80.4148	80.9935	51.4714	101.102	70.223	89.6079	80.8526	71.6358	94.4506	73.8366	57.0814	74.8335	79.9865
SD=15	Sim24	93.1658	76.0234	88.7102	94.7936	94.7219	77.5386	107.719	102.748	93.84	94.0015	90.0427	92.4915	70.5925	94.8688	75.256	87.2457
SD=15	Sim25	84.7878	64.5526	96.6826	92.0258	96.2384	84.9005	92.706	84.4375	88.86	76.3437	85.7849	107.555	89.903	102.698	103.782	83.6221
SD=15	Sim26	80.3319	97.3715	80.6256	98.0527	79.4124	74.2843	75.4046	78.5218	97.9099	72.1784	102.479	82.8485	95.3809	62.3502	78.0084	106.02
SD=15	Sim27	76.0316	77.195	93.3588	97.1846	87.1401	67.1356	75.4671	80.6138	83.9577	105.211	89.7381	64.9061	107.934	91.8454	72.6914	67.2497
SD=15	Sim28	77.1575	75.0755	80.1287	89.2375	81.9936	80.6065	84.6911	78.0884	81.4594	47.7067	67.4217	85.9384	97.0863	81.6765	74.5269	92.6018
SD=15	Sim29	91.3412	93.7992	84.0279	86.7555	79.1609	63.7268	83.0512	82.5007	94.047	86.086	87.9303	85.3603	79.7037	85.3852	88.4881	74.4712
SD=15	Sim30	87.9744	91.9996	92.8455	92.7325	106.176	76.476	88.2462	75.5941	92.8994	101.311	80.8821	69.0692	100.583	85.2157	99.5098	92.2399
SD=15	Sim31	74.5269	72.7631	91.8219	64.986	78.3617	85.1777	82.5287	76.7081	78.0817	102.865	61.4426	67.9094	64.8946	82.2477	58.5156	61.7962
SD=15	Sim32	83.7329	79.3145	92.4655	72.1247	75.0883	94.4282	57.6043	85.0895	78.5185	66.3107	96.6644	84.9879	92.4729	94.6267	71.2296	75.0669
SD=15	Sim33	81.6493	102.138	88.7491	85.5251	96.9393	109.175	84.9764	96.7915	95.7356	93.1374	88.9702	83.641	95.9708	75.54	100.815	87.8565
SD=15	Sim34	63.6483	98.552	114.72	75.8218	95.3328	96.0969	91.741	98.0967	94.0487	73.0336	110.005	96.1955	81.3833	82.7611	90.5896	84.3018
SD=15	Sim35	72.8033	69.611	68.3429	69.6445	65.7105	66.3808	79.276	76.9638	59.9884	80.9599	86.6598	85.1033	77.6706	61.9769	73.7376	71.3388
SD=15	Sim36	89.8194	84.8417	89.4739	95.8913	83.6427	87.9425	88.4111	76.942	86.2725	85.9863	87.403	77.0992	89.8082	82.5473	93.4562	90.4425
SD=15	Sim37	87.0844	75.1053	51.5185	86.3972	64.797	70.1729	106.933	83.3378	89.4316	66.6165	79.3234	94.1978	83.6655	89.5761	91.061	97.8313
SD=15	Sim38	88.5728	75.1054	89.0952	69.9156	68.9436	68.1647	61.6641	101.642	88.4356	81.4359	78.3265	66.4894	96.0348	70.8196	86.207	84.1406
SD=15	Sim39	79.1692	67.4748	95.7108	94.1975	81.1898	89.383	103.085	92.0444	79.3847	89.8352	75.1473	83.6383	108.336	82.3257	81.0994	99.2444
SD=15	Sim40	87.7222	74.7604	73.9238	70.4742	77.1708	89.0317	82.2699	89.973	80.5355	69.8457	83.7602	86.2738	100.505	72.4135	73.6329	70.7246
SD=15	Sim41	86.3575	80.3169	86.7342	74.2542	69.6099	86.8866	80.4281	96.7209	91.2362	88.2098	74.7871	99.1618	72.2519	94.9779	87.0128	78.9381
SD=15	Sim42	73.4077	84.8689	71.6591	87.0219	96.348	102.167	82.9794	98.2555	95.5598	93.2967	93.7909	105.745	89.5504	92.941	97.3921	73.8746
SD=15	Sim43	101.493	89.2113	107.083	92.6143	95.5927	86.9659	90.9627	114.69	99.9209	87.1953	71.6124	82.3556	80.1634	84.7983	73.1129	93.064
SD=15	Sim44	84.4033	91.7371	122.961	88.9187	82.4152	92.7955	95.7948	99.4036	92.6193	70.6589	87.2446	91.997	95.8493	98.4563	79.0642	82.2152
SD=15	Sim45	80.5445	90.3308	68.1172	88.355	100.565	78.4836	80.4669	88.4583	80.6383	84.5913	62.1119	75.5784	98.1045	65.1713	83.3199	99.1613
SD=15	Sim46	93.1842	94.8742	101.172	74.6973	93.3499	80.7752	70.8652	94.0795	58.1824	112.626	100.088	77.5638	100.63	100.055	84.3614	93.375
SD=15	Sim47	71.7975	63.7591	86.1876	72.0953	65.3705	93.2572	87.0824	80.3716	90.7136	77.7537	83.2725	95.797	64.9441	87.3812	79.2011	69.0471
SD=15	Sim48	69.2049	84.4189	88.6217	102.764	85.6775	88.3289	101.296	96.7713	79.0149	68.7767	74.1572	75.1633	70.5851	102.399	99.5078	90.9845
SD=15	Sim49	92.1079	97.4203	98.7335	77.5874	78.1272	79.3373	85.5966	88.7972	77.3467	91.2772	78.0292	63.4219	79.1008	80.5025	82.0632	79.6531
SD=15	Sim50	94.3965	87.3733	83.2022	78.5109	74.6028	88.2069	88.7691	104.743	78.6705	80.6845	80.9722	94.344	99.2028	85.5983	96.7339	83.2698
SD=15	Sim51	77.7002	84.3334	96.8034	70.6228	77.7339	80.786	87.124	71.8779	84.5617	79.2277	79.5252	61.0383	69.4804	89.4098	89.1869	74.6214
SD=15	Sim52	72.5459	82.0365	86.9869	85.5063	73.2335	82.1338	74.9022	84.7399	101.12	86.2839	78.2734	102.836	98.8935	92.8003	67.6386	65.9901
SD=15	Sim53	72.4745	82.0711	89.0594	94.8291	103.6	91.662	80.9059	84.5352	98.5083	101.585	82.5166	79.2439	94.4179	95.6948	87.6984	107.672
SD=15	Sim54	100.813	75.6463	68.378	82.3842	75.6312	83.3143	73.2258	76.5837	88.8604	85.7908	77.1567	98.9615	94.6951	93.8105	95.3839	100.251
SD=15	Sim55	92.3458	97.3108	102.876	74.6669	90.6066	77.7585	72.127	85.9905	103.28	74.4152	100.327	91.4101	102.875	80.443	76.4546	94.9533
SD=15	Sim56	91.5456	74.554	108.332	95.6274	86.5518	101.733	82.2318	94.716	80.4896	87.1984	105.2	71.137	94.9704	72.4785	93.4197	73.1513
SD=15	Sim57	75.7079	85.145	96.3516	90.6422	108.599	82.8151	98.6848	83.0352	84.4946	94.3822	81.0753	69.3843	83.7261	75.8147	93.1269	90.8166
SD=15	Sim58	82.6832	86.4428	78.0119	82.589	93.1663	78.0076	97.5914	71.6818	61.4586	89.2931	75.6038	100.982	67.8232	87.8816	90.0152	72.9981
SD=15	Sim59	84.0743	81.4568	92.6938	87.433	89.2898	93.3786	72.1336	75.9528	90.6977	71.0503	71.86	81.903	69.3967	75.5847	89.7504	70.959
SD=15	Sim60	100.404	79.9832	88.2609	98.8401	79.2217	85.1193	69.0224	81.9114	98.7567	78.7244	94.3665	94.4191	100.812	92.1679	93.9294	92.894
SD=15	Sim61	90.5731	73.5704	67.4066	91.8519	86.0146	95.0852	110.485	75.9386	79.3107	73.8639	89.5801	73.0457	77.1783	86.1207	73.6742	81.185
SD=15	Sim62	74.7249	82.6758	84.654	87.1228	105.301	93.8383	93.1806	94.9885	83.552	82.1429	78.5556	71.1649	99.6057	88.6806	87.8981	85.3917
SD=15	Sim63	111.771	85.4127	87.6671	91.061	113.979	76.9607	88.5311	108.899	96.7553	94.3973	95.3218	107.711	90.5596	94.3055	95.9487	96.6328
SD=15	Sim64	92.7579	84.5739	96.6259	82.5024	82.6185	82.6007	65.3369	91.3646	77.7731	87.4967	94.2351	102.507	88.6742	90.4543	76.9768	89.2689
SD=15	Sim65	87.9112	87.5438	90.9526	89.9456	94.1261	93.192	78.772	97.5174	81.0664	105.36	87.5128	78.3225	99.4648	94.5619	89.7654	96.3898
SD=15	Sim66	81.4358	86.9688	79.8481	95.5327	101.782	87.5337	71.8868	83.4786	76.3459	84.0416	81.5581	86.2629	71.0508	89.258	96.6383	82.084
SD=15	Sim67	91.5402	60.9458	79.0644	88.1001	78.4221	78.7694	94.8734	62.7462	112.565	72.9197	94.0736	83.369	83.2262	91.44	76.3416	92.6008
SD=15	Sim68	81.3428	80.0964	86.1767	92.8632	83.2532	86.6674	101.341	97.8283	67.3759	85.0305	89.7153	80.3432	85.1756	91.5331	101.402	81.895
SD=15	Sim69	92.962	89.3271	77.0242	93.1028	93.5924	82.9817	70.4594	89.3408	85.2588	88.9762	85.3071	89.7503	94.6906	99.9448	90.2867	74.2017
SD=15	Sim70	90.1781	81.4295	74.3264	107.088	88.796	98.0295	110.264	63.6563	86.8084	68.142	91.0118	84.9812	86.9458	86.9419	84.1862	80.8798
SD=15	Sim71	79.7678	80.986	80.731	102.918	89.6744	84.8934	99.0716	95.4219	90.66	80.8618	94.8891	76.8003	91.607	67.4087	79.306	89.5487
SD=15	Sim72	81.2175	107.2	78.5257	86.042	89.4598	96.2794	72.4939	97.3163	83.0746	72.8329	114.359	99.3994	109.441	100.589	94.0028	101.693
SD=15	Sim73	88.6611	82.2153	77.4876	82.8599	80.2267	84.0735	67.3027	85.603	101.167	91.1745	88.0327	84.2738	92.1718	85.5579	80.7111	76.9187
SD=15	Sim74	83.8825	84.5899	90.345	80.9843	92.3104	74.5427	74.3736	105.082	90.493	77.4574	98.4386	66.7742	104.71	97.6983	103.565	84.0528
SD=15	Sim75	83.4011	68.741	86.7188	75.87	80.6317	77.3226	88.8258	90.212	60.2726	93.2983	89.3366	73.7755	77.8389	78.767	94.107	92.3239
SD=15	Sim76	81.5154	79.9408	110.622	86.2669	83.5225	70.1276	75.3337	91.1592	81.7467	60.0212	106.806	90.404	76.645	85.0357	79.6074	85.6914
SD=15	Sim77	72.0168	69.7606	77.433	95.6829	96.7355	85.1482	86.1625	77.039	84.6313	100.521	93.6887	75.7596	103.332	90.3643	107.302	111.918
SD=15	Sim78	88.6163	97.6535	71.0553	71.7919	81.3276	74.4013	82.1529	97.4535	80.122	85.6282	83.3247	97.6	84.1277	97.9824	72.0115	97.9879
SD=15	Sim79	74.7862	98.9312	90.76	86.6822	59.7492	80.5645	81.289	79.1566	98.6602	87.5742	76.8505	70.2985	80.4182	81.3869	74.4962	84.7129
SD=15	Sim80	90.4372	69.5019	95.4087	80.6743	81.0544	93.4096	104.82	77.4273	88.1413	96.4819	81.3666	97.4179	77.2834	82.8188	82.9558	87.4011
SD=15	Sim81	91.7899	81.8344	96.914	87.196	93.4292	91.307	87.6001	67.7748	79.4337	90.0013	64.8188	105.727	86.0146	97.5109	87.0767	88.2004
SD=15	Sim82	85.3086	75.5583	77.1585	99.445	77.3089	87.953	90.7662	88.0211	81.7049	89.3646	101.499	83.3238	72.8548	79.4292	87.4056	96.6027
SD=15	Sim83	82.9932	77.8128	86.6024	104.153	101.061	91.2952	98.5842	91.6705	92.5901	80.4631	77.7348	82.0608	76.2656	78.8256	100.805	78.3796
SD=15	Sim84	95.1721	80.4496	92.1586	67.9183	105.342	83.6453	77.3077	82.6279	106.057	97.5324	83.8569	88.3759	93.1094	103.736	84.7695	84.6478
SD=15	Sim85	72.5682	77.341	81.3151	96.5947	103.524	72.1666	92.9443	74.7447	78.8692	94.1815	76.6949	90.6191	50.7294	91.4763	91.4962	82.3342
SD=15	Sim86	69.7063	66.9528	72.7727	82.5573	99.7943	81.7443	101.684	93.7992	87.3646	85.2106	81.6436	74.0596	92.3857	65.8838	84.3763	78.5356
SD=15	Sim87	65.0783	106.587	72.7969	70.1699	84.3215	81.4695	90.225	90.784	80.2847	87.9016	81.1542	82.4847	84.7472	91.7889	70.1402	68.8684
SD=15	Sim88	85.6465	75.6279	94.9697	72.5733	75.5693	87.2032	87.0129	70.76	81.7302	78.7464	84.6986	65.6832	76.6793	83.3999	72.4842	82.2233
SD=15	Sim89	104.41	95.9753	81.4779	86.7429	86.7228	89.5268	88.3577	78.1199	89.4714	104.323	87.9179	86.4454	78.528	71.1614	81.0238	89.4823
SD=15	Sim90	90.2154	71.7148	92.3113	104.32	84.511	105.219	82.9171	95.6211	87.58	94.1709	112.629	90.589	78.0295	86.4738	86.4777	86.8349
SD=15	Sim91	87.9693	72.2096	65.8256	67.1286	67.9378	72.9656	71.3285	83.1454	79.4069	78.4595	57.4887	85.5912	65.3991	70.167	77.9903	74.3941
SD=15	Sim92	88.8793	75.2007	86.0899	79.0508	94.7444	99.8481	92.3873	77.9124	89.9823	84.2024	98.8731	74.7574	78.6057	84.5316	81.4086	94.645
SD=15	Sim93	92.9847	80.2955	82.1191	84.1476	90.2888	79.131	68.7483	84.9066	75.8726	82.0515	74.2156	99.763	103.095	70.0181	82.8906	71.5912
SD=15	Sim94	81.225	70.513	79.7132	94.7069	74.864	64.5721	98.5729	75.9034	85.3552	79.9848	110.91	73.075	68.1345	62.5909	81.7633	77.7445
SD=15	Sim95	54.8801	88.0858	93.4804	81.7207	74.3502	101.59	75.6098	92.9476	82.8486	81.7673	66.1501	96.0554	81.9268	66.3869	73.8694	82.4395
SD=15	Sim96	86.1485	81.582	77.4856	72.025	94.0583	95.2429	85.4023	100.815	102.351	89.257	88.6076	89.9911	80.2014	97.1318	69.9642	92.4791
SD=15	Sim97	74.3639	87.9673	75.5855	89.5257	97.8578	91.9544	91.3072	78.5049	88.8453	81.8803	97.1181	81.8317	86.2612	88.7257	69.7588	64.7806
SD=15	Sim98	105.285	107.895	82.842	90.118	78.0808	82.0994	77.2279	79.2955	67.9876	75.7198	99.3082	70.3897	75.4821	80.2934	100.629	72.9073
SD=15	Sim99	82.7583	76.8066	87.1177	81.5208	86.2519	83.3481	95.0778	87.6748	90.0676	83.1979	82.001	77.2461	73.8063	80.0203	103.555	114.036
Result	ID	DBP01	DBP02	DBP03	DBP04	DBP05	DBP06	DBP07	DBP08	DBP09	DBP10	DBP11	DBP12	DBP13	DBP14	DBP15	DBP16
SD=20	Sim00	43.2831	66.8596	72.6288	71.8112	76.9356	80.4499	112.554	96.8676	70.6289	77.1798	96.935	39.9786	102.768	87.397	80.5931	91.3823
SD=20	Sim01	80.6471	95.5504	116.162	57.3599	66.3685	86.4454	77.622	78.7256	76.8011	76.6914	96.5587	79.1548	121.81	81.8189	63.2105	90.4846
SD=20	Sim02	110.818	105.522	90.175	85.326	70.9435	77.3207	102.964	78.7927	80.9262	95.7329	107.147	76.1333	75.0319	86.7919	123.792	73.9626
SD=20	Sim03	75.1675	93.7378	82.8538	97.0698	76.1856	92.938	78.2048	66.108	90.4089	91.9897	108.146	88.0853	95.9666	79.1937	76.9131	99.0208
SD=20	Sim04	63.13	96.8236	81.7563	87.2574	79.7695	99.0579	94.83	70.8479	70.4325	92.875	103.301	83.7939	64.7361	100.467	99.7324	91.7034
SD=20	Sim05	57.3715	82.1639	74.838	118.969	68.6054	77.528	65.3115	86.7202	99.2894	82.8231	96.537	93.1124	84.4769	105.433	73.5544	95.6945
SD=20	Sim06	81.8094	82.3552	112.174	93.7594	102.738	93.1743	66.5559	110.03	86.2578	77.3914	86.3576	85.6454	72.4977	66.5096	61.9232	88.0604
SD=20	Sim07	48.1543	84.639	73.0022	63.5238	73.2688	94.9071	79.0365	73.7368	70.9379	83.2564	95.7152	88.5385	71.6705	69.763	102.821	104.821
SD=20	Sim08	101.672	45.6624	96.3859	102.174	74.7152	89.3589	92.561	80.2762	105.775	94.8643	105.032	90.242	85.8104	104.249	77.6628	102.871
SD=20	Sim09	103.311	95.4475	89.2488	75.8432	83.6459	78.2578	108.021	108.439	68.158	88.178	86.9527	103.354	89.3818	97.0223	88.5525	79.5114
SD=20	Sim10	74.3188	84.9455	101.995	96.774	106.778	81.0185	99.4382	87.0461	85.2324	86.2537	94.962	57.9999	98.1376	69.9896	90.9977	69.546
SD=20	Sim11	84.6909	78.8477	72.1876	101.828	63.3666	78.2393	103.486	86.7764	109.306	95.4483	85.5705	105.643	111.274	80.2593	97.4383	64.7151
SD=20	Sim12	73.6597	105.477	93.5217	94.3453	85.1403	77.4924	81.2884	70.6943	72.5635	73.1607	87.0201	83.2079	83.1462	58.7191	101.646	76.4709
SD=20	Sim13	75.0117	100.26	68.4686	102.883	108.27	103.751	110.679	93.5207	74.281	71.0105	67.2957	104.785	74.3549	76.9607	63.9266	75.6099
SD=20	Sim14	65.8147	68.7468	91.5428	88.2393	90.9986	77.1056	80.8682	60.1899	91.8472	101.537	95.7902	72.9206	97.9113	80.0751	91.1787	68.0553
SD=20	Sim15	98.8111	82.388	56.1027	68.8843	102.041	43.3277	94.2334	102.26	101.9	85.5762	78.9415	90.2623	85.1201	77.0975	85.1309	72.3507
SD=20	Sim16	89.7495	76.5745	112.776	85.7225	77.351	78.7098	70.2085	86.1213	82.2307	99.2467	70.7941	98.2586	90.0038	69.4643	89.3299	74.6591
SD=20	Sim17	67.4595	88.662	87.9444	89.7342	78.4118	80.1582	76.8646	119.2	111.601	54.3401	71.9649	77.6154	83.1222	89.4126	109.217	81.6505
SD=20	Sim18	83.6318	87.7172	107.123	69.3723	105.367	79.8166	70.1775	68.7632	108.071	92.0239	95.0404	81.7228	83.8941	99.3968	96.5742	86.3283
SD=20	Sim19	92.7613	76.8494	90.0629	71.6324	75.3091	60.6682	73.8507	79.5419	85.0507	70.0564	90.0208	106.81	92.2121	103.205	88.5647	76.5026
SD=20	Sim20	92.7216	91.9317	89.7223	81.4026	103.823	76.2917	82.2981	93.3104	88.485	106.776	94.8853	66.6531	111.219	86.8343	91.8518	92.09
SD=20	Sim21	84.389	68.5551	83.028	89.8816	85.184	95.607	76.2173	95.624	109.446	62.7636	90.7767	83.1842	65.9796	100.409	68.8764	90.6974
SD=20	Sim22	45.9665	91.0936	107.24	75.9573	77.0595	100.959	109.489	84.7048	98.6075	113.994	81.7625	103.721	96.4017	110.895	94.7252	97.0349
SD=20	Sim23	82.0127	101.736	78.6776	60.7434	68.3274	63.0506	81.123	66.7574	70.9211	82.8749	106.492	97.3091	73.9279	54.6039	79.7126	96.154
SD=20	Sim24	89.1195	100.343	77.1926	81.5754	62.851	75.1135	50.5756	108.245	97.3664	91.4117	110.765	106.212	107.275	73.5207	66.301	82.5243
SD=20	Sim25	71.973	108.8	126.455	104.164	136.505	96.8199	59.9507	94.4158	71.6189	82.4271	95.709	62.8976	103.672	89.1534	76.0752	89.879
SD=20	Sim26	75.8807	53.3368	104.098	82.2595	70.6203	77.3028	91.2179	103.986	76.8463	105.223	96.5111	84.8655	94.3237	115.032	80.1228	78.1968
SD=20	Sim27	71.6169	78.0396	84.834	98.2623	88.3151	49.3214	80.7535	79.7388	99.7491	104.657	67.7025	61.4382	87.0692	97.4158	70.5441	111.591
SD=20	Sim28	59.1371	87.6616	92.0465	68.7892	71.5339	80.0114	83.5662	78.9717	82.0441	97.3589	89.3574	83.4387	64.0479	98.5086	86.7089	67.0885
SD=20	Sim29	94.166	72.0616	75.1975	60.1358	83.8856	74.1225	91.7586	69.6413	65.1656	86.2102	105.259	47.0485	69.4969	84.1191	76.5148	84.222
SD=20	Sim30	89.3528	83.1464	95.4768	66.6691	62.2966	89.3519	78.5847	78.052	90.3457	89.792	80.8791	76.5585	89.8906	78.875	72.5007	96.6671
SD=20	Sim31	84.4363	66.3789	73.2998	84.3805	64.0851	83.5956	112.664	81.4083	57.1505	98.0144	66.0813	102.032	101.198	84.5626	87.7998	61.7384
SD=20	Sim32	75.544	97.6244	87.1122	82.1073	82.6796	76.538	90.68	90.8672	71.3772	82.3505	59.1522	97.9264	58.3431	73.4204	61.2933	89.0333
SD=20	Sim33	75.4955	73.8045	72.5266	89.4599	88.6793	63.7799	84.3612	95.8764	89.3886	77.3176	92.332	77.296	91.5892	81.1719	114.742	77.5085
SD=20	Sim34	104.62	107.313	93.6801	73.6619	81.3869	107.992	83.3846	86.0354	83.8983	82.8065	107.649	79.546	78.9482	74.3017	88.7743	97.8192
SD=20	Sim35	105.958	58.7731	89.434	91.6438	82.9016	77.4226	111.374	71.5837	69.4675	82.7067	78.1642	75.5059	104.359	84.3704	100.353	80.7642
SD=20	Sim36	81.4502	80.626	100.495	129.431	93.8333	82.3357	104.803	78.1674	104.818	73.4653	93.1071	60.68	98.6769	99.4273	69.6761	83.9874
SD=20	Sim37	106.938	108.871	103.166	72.6463	91.6294	80.3289	95.9205	96.1008	95.6772	85.678	99.2049	54.2453	102.33	76.357	76.8979	73.1733
SD=20	Sim38	88.5266	64.2645	66.4345	83.5726	61.4215	82.0313	82.1782	85.6847	78.0896	62.6688	56.0375	90.1225	70.0882	75.9792	64.3383	66.847
SD=20	Sim39	89.3814	81.6862	79.6652	81.8986	78.666	95.7232	71.896	81.7083	72.2001	82.129	75.977	88.4381	74.0426	74.1626	78.0094	82.8081
SD=20	Sim40	63.9263	52.8156	87.5798	67.3113	103.641	70.5095	89.6671	69.3102	73.5797	74.7589	100.668	97.4891	91.3282	106.694	82.1714	70.4536
SD=20	Sim41	93.1289	65.081	85.0648	67.9862	75.2395	79.0356	89.2733	73.6447	78.3186	60.91	84.8877	69.0534	63.4467	87.5233	75.1908	70.0669
SD=20	Sim42	95.7133	82.2625	86.3094	95.5638	86.0273	78.2108	90.6994	88.0219	121.876	95.411	90.0767	78.6266	90.1236	89.3386	98.3327	78.2151
SD=20	Sim43	100.825	109.986	101.541	88.9176	92.2751	97.3394	58.196	97.764	97.8865	120.106	66.268	95.632	118.34	81.956	94.0982	77.6263
SD=20	Sim44	74.016	102.924	92.4943	81.0756	67.6288	98.5414	83.4263	101.706	103.3	93.7793	87.1969	81.5273	101.44	120.567	91.305	57.8901
SD=20	Sim45	91.1607	80.4362	59.6328	84.467	78.4034	80.3507	92.9772	89.8733	75.6253	71.8369	81.8389	93.4578	82.2618	59.5611	83.1174	71.8367
SD=20	Sim46	99.7618	69.2716	96.6495	96.8924	101.4	83.4249	98.2875	98.5922	86.8901	88.5343	104.624	74.8144	92.7117	91.2757	108.365	61.8347
SD=20	Sim47	74.446	70.892	78.7356	98.0411	80.9246	88.9052	80.0265	85.1698	90.6835	51.9268	88.7936	100.752	78.878	105.493	93.4097	65.3723
SD=20	Sim48	104.92	107.468	78.3075	99.187	73.7236	82.4286	83.8893	73.3708	65.7546	68.0628	76.9404	97.6388	84.7304	89.7596	71.958	75.5244
SD=20	Sim49	88.6836	93.0226	115.687	84.1227	66.7333	58.7441	79.8105	68.5051	78.485	74.5761	69.2912	61.8983	72.7606	81.3104	80.4714	97.0515
SD=20	Sim50	53.8159	86.5113	92.8663	98.12	74.3889	85.3803	92.2905	72.2011	91.1665	71.9867	92.8708	102.743	93.5892	95.4065	76.5463	96.711
SD=20	Sim51	89.7884	61.8003	57.2265	57.5677	80.2205	89.4578	81.2141	93.5026	79.2867	94.1213	77.1907	67.6518	67.7051	40.2753	83.1842	82.0097
SD=20	Sim52	85.2671	80.8259	101.978	93.6928	85.8385	81.7125	93.6255	117.607	100.543	107.4	78.0656	59.7886	95.4493	64.918	65.17	74.8352
SD=20	Sim53	123.77	97.7825	83.8231	57.0509	113.875	79.4603	73.6969	68.5159	98.2292	103.943	121.551	67.1838	92.1859	83.6238	93.5026	94.4588
SD=20	Sim54	84.917	84.1825	87.113	93.53	116.3	93.2986	62.1451	72.1288	61.5892	101.012	81.6784	95.9212	95.618	85.1119	76.7818	107.683
SD=20	Sim55	98.8959	113.946	76.1871	83.7118	84.7986	107.742	107.52	75.1755	81.6687	101.873	99.0551	109.48	81.6867	90.8348	91.5543	74.3676
SD=20	Sim56	94.9323	52.1477	79.4454	94.6102	77.9352	105.997	86.5767	113.317	101.276	78.144	69.4177	93.8574	72.4945	103.09	80.8911	82.5412
SD=20	Sim57	75.9548	102.857	93.9339	78.1473	84.5103	89.5496	84.5624	86.9147	92.2735	116.739	55.927	80.9719	74.3752	86.6258	69.32	87.995
SD=20	Sim58	71.993	76.6248	98.0416	80.6185	99.7672	75.1051	84.7262	77.3377	95.2251	103.964	65.0947	89.8111	83.595	72.4295	85.8196	86.0569
SD=20	Sim59	77.9121	56.9002	79.9219	88.5027	87.3521	80.1448	78.6726	66.6635	88.3019	87.6405	83.5401	65.2838	92.8364	88.5648	132.502	52.5782
SD=20	Sim60	69.3757	93.1616	89.0915	93.4519	109.407	73.9006	107.016	81.7609	100.365	108.775	95.3542	80.5243	64.4452	89.423	75.7631	72.1693
SD=20	Sim61	69.5201	94.7356	72.7215	61.1752	113.125	99.0609	83.8395	75.049	80.2933	85.0744	61.4407	90.9566	76.09	100.828	78.1239	97.3791
SD=20	Sim62	86.6088	110.122	84.4242	81.8506	81.9594	92.6164	115.358	124.038	83.1227	83.4322	78.5248	105.093	82.7299	71.3752	58.7266	104.954
SD=20	Sim63	75.999	64.4885	99.8519	73.0951	75.3083	100.354	94.7527	116.773	67.7432	77.5627	99.6973	78.3756	83.4744	91.8703	84.7491	83.3691
SD=20	Sim64	80.1251	85.3569	101.168	108.328	68.4258	97.0441	58.8578	77.5685	88.7515	101.13	60.2776	84.8765	119.765	89.3842	93.2588	89.397
SD=20	Sim65	110.528	84.2143	91.1942	88.1496	86.8433	99.5148	97.5562	61.4448	77.093	71.6511	62.6076	84.0999	109.889	90.0101	85.2434	76.8152
SD=20	Sim66	98.0482	95.6143	96.168	104.131	100.269	100.651	83.6131	81.7539	70.6543	96.2018	96.2231	81.2571	134.119	82.1816	91.4696	99.3808
SD=20	Sim67	78.2953	56.9179	76.076	96.4514	97.5134	110.18	89.9483	70.9629	71.0427	76.8335	97.5165	78.1487	82.9886	74.0606	91.1453	90.8854
SD=20	Sim68	84.6359	105.849	80.5383	110.345	74.8854	77.3712	76.3045	88.0092	84.3587	57.8539	95.2036	94.0566	105.64	101.318	90.589	82.5724
SD=20	Sim69	102.855	90.3422	97.2229	90.9253	104.443	87.1546	70.5555	87.3861	78.028	89.2673	94.3156	105.362	87.956	91.6642	96.9489	110.323
SD=20	Sim70	82.4142	111.556	89.0582	91.1851	81.4543	80.6734	54.3702	94.6117	61.9331	91.3959	98.0474	78.1258	81.5324	83.1031	81.9473	93.8115
SD=20	Sim71	98.5937	109.664	86.0811	102.209	75.4038	79.3686	95.1114	107.092	109.995	76.6209	102.222	75.6402	99.9022	70.2529	47.5581	83.5184
SD=20	Sim72	82.1206	75.3077	84.5594	93.3634	101.069	73.9302	72.4461	71.4326	94.9269	92.6529	95.4565	90.1627	114.677	59.3766	92.2947	82.6554
SD=20	Sim73	58.866	89.1286	53.8453	79.4399	77.7236	62.4115	76.9413	87.5895	70.6973	83.7574	63.2011	75.2738	64.6111	77.0599	79.9073	98.3611
SD=20	Sim74	89.6686	73.9735	58.2625	65.9083	83.906	75.5936	71.4499	84.6612	98.1125	97.5283	89.7474	88.0617	65.672	75.2444	66.9079	99.7792
SD=20	Sim75	69.4001	72.0567	95.9491	71.5036	76.4889	87.9447	57.5137	96.2026	69.0637	58.4881	99.0688	84.2771	104.475	76.9217	92.5902	72.4696
SD=20	Sim76	106.299	69.6708	95.0307	73.931	69.2508	98.9439	80.8575	85.2948	79.6506	94.4874	60.6229	62.6377	73.4753	61.6518	93.8778	75.4604
SD=20	Sim77	96.5236	105.981	84.1348	66.3083	98.3178	112.007	99.9485	98.749	90.3947	70.794	73.3905	69.9629	85.6959	99.4806	113.917	68.1389
SD=20	Sim78	83.2003	89.1126	82.3314	83.4157	108.273	90.7234	51.0944	96.348	69.4999	84.6051	84.8236	56.0225	101.574	77.1367	97.9073	75.4475
SD=20	Sim79	92.9833	71.3892	60.0148	97.417	71.9599	104.959	76.7296	84.8814	105.827	70.497	59.6296	95.8558	96.0086	68.1551	108.556	69.2942
SD=20	Sim80	41.0656	102.196	77.1768	97.1091	82.0652	93.9166	76.0171	96.599	66.1808	78.8152	70.9012	69.5407	96.4923	97.2853	69.2071	74.8019
SD=20	Sim81	79.6249	77.2436	66.0191	109.418	90.3818	76.0883	80.0179	81.3304	81.1554	90.8341	68.1881	80.6676	93.1858	86.6753	76.5328	91.6965
SD=20	Sim82	83.2263	115.177	107.699	107.511	84.3641	104.462	77.7135	51.3779	97.6379	97.6988	86.0716	77.202	95.9369	112.121	92.8768	74.3065
SD=20	Sim83	101.052	103.538	58.899	72.5262	107.383	96.8488	90.0844	90.4028	100.755	87.4018	99.8331	82.759	81.5605	88.7755	102.991	77.5264
SD=20	Sim84	77.0949	78.0776	76.6091	88.8875	82.404	82.4522	73.57	88.4944	101.804	64.8498	73.6119	73.5296	83.5277	92.563	106.323	93.4578
SD=20	Sim85	84.1112	87.6874	96.3889	87.3941	85.2381	74.0924	69.3274	58.0718	90.5643	103.523	81.3566	96.4358	84.4934	83.1283	87.3678	85.4001
SD=20	Sim86	84.233	81.0585	88.4894	106.417	100.518	66.9146	89.6762	96.0089	83.2348	86.1169	80.8835	109.518	78.8571	67.2274	92.5192	84.0928
SD=20	Sim87	95.669	74.1988	73.653	72.9542	107.676	103.277	80.2631	77.6663	82.3502	80.8188	70.3782	84.0159	82.6209	83.629	85.2338	80.4308
SD=20	Sim88	78.863	66.0788	89.731	75.5677	86.2269	70.055	99.705	74.5297	84.0309	84.8495	57.6247	78.3384	95.4024	77.6782	72.7224	84.0309
SD=20	Sim89	68.772	84.8196	100.012	59.8671	81.0903	96.1021	73.9433	89.7191	101.526	75.4107	102.987	61.9741	62.5148	78.6205	89.527	85.1524
SD=20	Sim90	89.2697	84.0627	92.0471	79.0068	103.567	101.364	71.5974	88.7171	102.988	83.4289	111.741	73.1174	97.4216	64.1951	86.7768	78.4262
SD=20	Sim91	88.8925	47.2621	84.5761	93.3385	104.27	73.6238	60.8466	83.6474	70.0836	86.779	98.9294	70.3671	82.9774	62.0724	76.1295	106.123
SD=20	Sim92	108.136	94.4284	112.996	83.4238	90.2469	84.4161	79.9321	75.2676	86.038	90.8264	95.0183	98.8195	95.7137	98.2136	80.9487	81.5969
SD=20	Sim93	83.8104	74.4358	94.8838	75.4383	83.6878	68.3674	82.0317	86.6377	67.9222	57.6967	95.3265	88.0629	102.408	118.56	102.566	77.7888
SD=20	Sim94	74.2466	65.4203	70.3049	98.0795	88.2879	85.853	102.96	77.3914	79.7597	72.8742	94.6872	83.8608	79.1084	76.052	82.9795	77.0809
SD=20	Sim95	76.1383	113.493	72.3392	106.756	94.9151	87.9276	96.4458	86.8403	73.6717	84.7755	98.6241	96.5936	97.3728	102.18	98.623	80.6813
SD=20	Sim96	66.6401	96.3613	107.555	69.582	108.687	78.6555	75.8326	81.074	109.272	53.8463	97.5803	76.2396	88.2234	93.8831	85.7803	67.991
SD=20	Sim97	96.6066	77.4359	55.4039	97.4454	76.3552	102.586	86.0682	58.7038	80.5925	94.5725	80.2468	91.5018	44.7243	91.8131	88.3654	99.4103
SD=20	Sim98	77.2841	60.1242	90.8086	83.9643	87.4976	71.4681	44.5441	91.2201	48.8555	87.681	82.4215	103.315	96.5571	70.1512	58.5136	71.8977
SD=20	Sim99	58.6922	68.4898	78.1906	77.1621	74.742	85.6256	81.6358	87.9527	84.3328	76.6635	78.0534	68.1493	78.9629	76.5691	56.8228	90.2437

## Sheet: DBP_K20
Result	ID	DBP01	DBP02	DBP03	DBP04	DBP05	DBP06	DBP07	DBP08	DBP09	DBP10	DBP11	DBP12	DBP13	DBP14	DBP15	DBP16
SD=5	Sim00	85.0225	83.4128	86.1507	86.792	84.1294	76.6917	80.7482	77.9076	79.3211	82.7508	80.0545	77.1758	84.0151	84.6267	79.1576	86.445
SD=5	Sim01	89.146	84.8113	88.6219	83.8142	93.0127	87.2722	87.7377	86.4967	96.1656	94.1883	82.9322	84.8283	92.4424	93.0796	95.3473	90.7301
SD=5	Sim02	86.4562	86.7047	85.5163	84.0937	86.6393	87.5476	79.8228	91.6672	84.1229	85.7229	93.8257	89.4064	85.7081	82.7171	80.5693	90.9066
SD=5	Sim03	87.5864	83.5753	86.7348	83.2735	88.0085	85.5029	83.4237	96.1472	88.7956	79.427	91.8206	89.916	90.8975	90.0039	85.477	87.5615
SD=5	Sim04	85.8454	82.8348	89.5064	85.9746	88.7582	87.7511	87.3632	88.9892	87.5208	84.7821	90.994	90.7721	87.8325	88.763	92.1353	94.0777
SD=5	Sim05	84.9378	82.7922	82.5033	90.4278	80.1157	88.8521	84.9715	85.973	81.2905	83.7242	80.6452	85.1429	85.8597	86.1144	81.0756	84.7561
SD=5	Sim06	81.4271	81.2848	76.3624	85.8232	78.5563	84.1027	81.7168	84.6281	77.1659	83.6997	78.1008	85.8712	77.689	83.8783	79.6623	75.1982
SD=5	Sim07	87.8836	77.7461	85.5924	86.9636	86.1072	80.5134	84.3968	84.0844	86.7277	81.9057	88.2528	73.4987	88.1986	82.8066	82.8208	80.8002
SD=5	Sim08	91.1929	84.1371	89.9171	85.7635	87.6134	87.3245	88.0182	89.3522	84.633	88.3077	91.4164	84.2767	84.8664	89.7066	86.8889	91.9868
SD=5	Sim09	91.8364	98.8255	93.4837	84.7174	89.9245	86.9746	86.2619	86.8956	90.1348	84.7645	87.8873	92.2133	91.8987	98.4081	92.2956	87.444
SD=5	Sim10	83.2437	79.7388	86.8011	85.9935	88.4912	89.0051	86.3763	85.3317	91.8245	90.6789	89.5352	89.365	89.4931	86.7864	80.8923	86.4139
SD=5	Sim11	83.0088	83.5018	86.9995	83.6927	84.5863	76.7542	84.8229	87.3868	82.924	82.4046	84.0083	84.7708	88.2294	88.9674	89.1467	84.4418
SD=5	Sim12	81.6317	80.8725	80.7195	84.1955	82.9461	82.6842	85.0276	80.4076	86.5287	77.2755	89.5366	81.914	84.3346	89.583	88.8502	87.249
SD=5	Sim13	84.5775	91.4178	87.387	88.5864	90.9936	83.4244	83.2077	85.4237	86.9361	85.893	91.244	88.6092	82.4107	91.8307	86.7532	91.3238
SD=5	Sim14	83.6807	80.5664	86.1699	83.3137	82.7268	86.0307	81.4162	85.3474	85.2593	82.7242	84.7571	83.6977	85.0955	84.5205	80.8532	78.6138
SD=5	Sim15	80.1159	80.7959	80.9379	78.2953	83.5292	85.0349	90.0427	83.7068	84.3576	80.3043	82.2403	84.3052	77.6209	78.6297	79.0023	81.716
SD=5	Sim16	88.6726	88.8079	85.9207	80.1655	93.2708	85.333	84.1673	90.7606	84.2221	82.3462	93.7831	85.9751	86.582	89.8495	86.3689	86.7017
SD=5	Sim17	72.0716	77.6286	81.5592	84.6326	88.2469	82.0091	88.8133	80.7798	81.4692	81.5793	81.0647	83.1693	81.08	75.5473	79.6597	81.5634
SD=5	Sim18	94.3118	96.4976	80.9264	86.2343	84.4666	86.4799	84.5021	85.3792	91.1527	88.2762	87.2793	91.8119	88.4971	83.1389	86.229	90.4114
SD=5	Sim19	78.4355	87.752	85.8554	80.3009	76.354	82.8182	81.3726	83.2394	82.3005	77.2643	77.6363	78.8204	86.1731	80.8799	80.4816	80.1801
SD=5	Sim20	84.433	78.7123	80.5461	82.6158	82.6029	80.4562	84.1965	77.5057	84.742	81.4263	83.2218	88.2603	80.1763	85.9931	80.5517	82.2189
SD=5	Sim21	81.0398	81.3648	81.294	85.424	87.9938	85.0761	91.1462	84.2918	94.8415	90.4967	78.5693	84.3339	87.7916	86.2437	93.2022	85.5287
SD=5	Sim22	83.5715	89.5227	81.1351	83.7549	76.8736	89.3926	79.1325	87.5793	80.436	86.9533	83.3948	81.1245	86.7733	77.2758	84.8053	78.8689
SD=5	Sim23	74.3979	79.2767	79.7129	81.8561	81.9161	84.7844	74.7789	83.036	83.5964	80.3699	81.7967	79.867	82.2507	75.9114	80.1442	74.7748
SD=5	Sim24	90.1018	84.1523	87.9856	86.0448	88.7279	89.8511	87.0146	89.4767	87.234	87.2206	89.8645	89.5462	85.4022	93.0249	92.999	89.9841
SD=5	Sim25	89.0382	92.2675	91.7709	91.0449	94.827	92.0269	88.1523	85.573	89.1233	84.191	88.2195	86.4974	89.5555	87.4936	86.9006	94.5495
SD=5	Sim26	86.7375	85.2773	87.4836	89.0083	88.9148	88.2071	89.5422	89.3054	86.6992	89.174	90.7883	89.3509	93.4579	82.1581	90.4378	86.9126
SD=5	Sim27	84.4159	84.8052	84.6548	82.5807	82.8076	81.7619	85.3793	83.1498	81.2568	78.8935	80.9583	80.8007	83.1368	82.0562	79.391	81.8157
SD=5	Sim28	85.868	80.7408	83.151	84.571	83.7029	81.324	85.2221	75.6231	74.1019	82.9316	88.8181	80.5208	74.7353	85.5762	80.5467	79.6864
SD=5	Sim29	81.4359	82.9996	87.5231	87.4752	80.0459	80.4251	87.3291	83.4258	89.71	83.5027	81.6955	87.2313	80.9942	81.1129	78.8979	83.0307
SD=5	Sim30	86.645	89.5514	88.3505	91.375	86.566	85.8968	78.7217	86.8335	83.2784	97.9468	87.4176	88.2217	82.8083	86.7943	87.8887	79.4975
SD=5	Sim31	79.9331	82.1532	79.5817	78.8482	82.9243	84.3924	72.7271	79.7321	86.6692	77.8839	84.533	73.3739	85.5051	83.2103	79.0649	78.6308
SD=5	Sim32	86.9604	85.5968	83.3006	81.3326	80.7861	80.9805	83.793	81.8486	77.0556	81.2682	73.6109	83.6115	88.2277	77.3784	82.6704	81.536
SD=5	Sim33	87.4731	89.563	84.2956	81.5031	86.7686	82.0399	89.426	91.0692	83.7213	86.1301	82.4926	78.1805	90.3034	83.2579	90.6202	91.9091
SD=5	Sim34	87.1351	94.3938	91.0064	89.8107	90.0716	83.0132	91.4989	88.0802	85.4396	94.2894	82.5705	87.3157	82.6558	86.872	89.4193	83.7347
SD=5	Sim35	83.2805	77.9111	80.1993	74.505	81.1708	86.284	74.4792	82.6939	75.2679	77.4195	79.9285	87.2736	82.9836	81.2576	74.796	79.9931
SD=5	Sim36	82.7643	88.9686	81.0776	85.6712	90.6325	86.5379	83.4919	79.1089	84.2395	80.7378	90.9815	84.4982	80.7832	80.781	85.1921	82.8857
SD=5	Sim37	86.6782	86.1012	81.8709	85.6698	82.246	77.5346	84.8315	86.3166	83.8215	82.5371	92.9563	87.8121	87.9591	83.9649	86.9713	86.7733
SD=5	Sim38	79.348	77.328	79.32	77.0532	76.4183	78.0526	84.5116	79.7685	78.8394	77.1225	82.9546	84.6888	80.7363	82.1475	83.5198	80.8866
SD=5	Sim39	91.8796	82.7625	84.1029	79.2882	95.4155	93.5994	81.3329	88.9925	88.2924	88.8649	88.5492	83.6895	83.8679	87.419	90.5523	93.6726
SD=5	Sim40	79.9887	86.7262	80.5978	82.1891	80.9785	82.3181	85.5589	81.642	81.616	81.4752	86.4357	89.0142	94.0876	85.8541	85.6431	86.9292
SD=5	Sim41	75.4903	86.6184	84.1565	77.3942	85.5557	79.3022	80.9759	78.1844	84.1079	86.2513	79.4939	78.5443	83.3245	80.1906	84.1763	84.7515
SD=5	Sim42	90.7937	89.1819	83.4365	94.8231	86.2315	86.9734	89.7011	88.868	90.8085	93.61	89.9794	86.358	94.5765	95.0619	87.6373	91.695
SD=5	Sim43	86.6018	90.3397	87.7605	91.6911	86.9042	87.7345	89.0828	89.0495	89.0571	83.0942	85.3227	87.6856	79.5875	92.5055	87.4416	82.5716
SD=5	Sim44	95.1904	87.3535	95.6637	91.3897	89.6606	86.2407	89.7872	89.4618	92.3228	90.6854	92.9056	89.3135	86.8815	82.5879	97.6179	82.5349
SD=5	Sim45	75.5547	82.7746	80.5117	82.1059	79.5221	75.4155	74.0739	84.9736	80.6759	78.5593	80.1679	72.2052	83.7568	81.9758	83.5834	78.4448
SD=5	Sim46	83.0833	86.8045	83.0466	91.0139	89.121	86.1562	86.2795	88.723	85.0967	90.6916	87.3563	89.9782	84.1021	89.922	88.65	88.1893
SD=5	Sim47	85.5501	84.3338	81.6049	83.911	75.0089	78.5792	83.2545	83.2004	80.7657	84.0938	78.4198	82.9408	80.73	80.6921	83.113	84.0616
SD=5	Sim48	91.0227	90.0014	90.5942	92.8843	92.7734	93.9589	92.4418	87.6086	86.0092	89.732	90.8887	92.1678	92.4399	88.7583	89.6274	88.9361
SD=5	Sim49	80.1273	84.3975	78.0353	82.4481	74.1161	81.2024	82.1194	80.8683	87.101	79.4505	72.0294	75.3895	81.3432	79.039	83.5398	76.3888
SD=5	Sim50	78.3527	82.3417	92.7513	86.4629	84.9244	92.2283	83.8784	90.5942	92.8262	86.2327	87.1702	83.7028	85.7453	82.7047	86.8424	81.3831
SD=5	Sim51	79.5537	71.709	78.377	75.7681	82.3899	76.3846	83.2836	81.3029	83.2367	84.1877	84.4949	79.2218	77.4751	71.386	85.5505	83.5868
SD=5	Sim52	80.935	88.6724	85.1156	86.8175	89.8245	86.3026	87.0395	84.7145	87.9621	96.3347	85.3506	88.7044	91.6985	84.7624	90.9419	85.1405
SD=5	Sim53	87.0439	85.5898	87.3751	85.7313	83.2314	90.2052	89.172	91.1511	88.9335	83.7668	91.5877	88.9333	92.6661	86.8196	93.5405	95.8348
SD=5	Sim54	80.1913	93.5647	87.6904	83.5902	80.5873	84.1404	83.3256	87.3719	81.0946	90.7577	85.3629	82.9053	89.7541	84.896	82.6224	84.5936
SD=5	Sim55	90.2297	93.0546	94.1309	92.5303	89.7827	95.0097	92.8632	93.3285	80.3121	89.3051	88.5329	86.4439	88.6558	89.4662	88.0294	87.8164
SD=5	Sim56	89.6896	88.7453	89.356	90.5923	95.6977	86.7662	87.0073	91.3743	95.555	89.8545	88.733	82.6688	91.8173	83.2675	89.474	86.0326
SD=5	Sim57	85.9997	90.9327	85.9285	87.5232	86.4246	85.3291	79.4868	87.6573	93.3065	86.693	92.7012	91.9212	87.7392	89.0803	86.7368	89.9278
SD=5	Sim58	80.7808	84.6672	74.79	73.8989	82.5238	75.3377	82.6597	82.4707	78.8188	81.1347	75.9345	81.4479	76.9201	74.1239	77.4636	82.5828
SD=5	Sim59	81.6299	85.8528	77.7701	83.9055	78.2597	83.0696	85.8229	90.5087	75.8873	84.594	88.7005	86.137	79.1936	82.4009	82.0963	83.6885
SD=5	Sim60	89.164	88.4485	84.0491	87.1478	92.8144	79.8818	92.2454	91.5902	86.4824	92.7695	86.6567	91.0082	89.4926	85.3134	83.7427	89.7016
SD=5	Sim61	81.9996	87.3797	88.3	87.2685	88.5732	81.523	88.1018	84.3822	91.2817	83.788	85.4955	94.1625	93.076	86.6151	88.2782	85.7719
SD=5	Sim62	88.3552	91.3831	86.0945	90.2712	91.9033	81.2238	87.9781	86.2065	89.9271	87.8237	91.1294	90.1771	91.6374	87.0606	83.5765	86.7358
SD=5	Sim63	91.2647	89.8883	86.1635	94.5303	90.6398	87.2619	95.9155	92.7946	91.302	88.7408	88.2962	88.823	88.8777	93.1049	87.0764	90.8151
SD=5	Sim64	80.1029	86.6266	87.3684	85.1154	85.8231	82.8168	83.8474	85.0463	88.1782	82.9554	86.7673	87.0152	87.2991	86.475	88.8947	87.7262
SD=5	Sim65	86.3173	85.1146	87.01	91.578	92.3709	93.6747	85.7477	85.9586	92.4819	86.2986	90.1517	83.8033	89.4502	92.7414	88.513	93.5541
SD=5	Sim66	80.0561	88.9453	92.2699	86.4621	82.5442	85.0891	89.3348	83.3151	88.2962	87.0436	93.5361	86.4812	87.3889	86.4625	84.1317	86.6828
SD=5	Sim67	80.5574	82.9058	82.5891	82.901	81.9638	81.189	79.5211	78.3883	76.9465	81.8223	77.3002	76.4047	82.8184	83.2211	79.0608	81.2452
SD=5	Sim68	88.44	87.1819	85.7989	87.9093	82.827	90.3428	87.6495	92.0856	79.1695	90.1964	89.4076	89.4721	85.3432	86.048	87.8443	86.7021
SD=5	Sim69	87.1891	87.1755	86.2009	89.6443	87.808	79.6252	90.214	83.7592	86.851	87.4239	82.5212	85.917	98.3909	85.7599	82.755	92.5492
SD=5	Sim70	80.0314	80.6262	84.0227	81.2582	80.6065	81.6161	84.7493	82.027	86.1742	81.9805	85.2168	83.6908	81.6566	78.3396	72.9482	78.7329
SD=5	Sim71	86.1246	83.6131	78.6344	86.5314	92.6082	85.8738	88.2683	89.0356	85.0029	85.2274	85.813	89.8643	85.3744	90.4647	85.4617	90.0731
SD=5	Sim72	95.866	91.0172	88.8152	89.6152	85.1072	90.6757	89.5954	87.4188	83.8738	92.1213	80.5111	84.2793	88.5577	82.2393	82.5481	88.2188
SD=5	Sim73	73.1809	77.7357	81.179	75.2535	76.3497	82.8831	80.357	92.4085	80.7735	85.974	84.3451	78.7114	81.2226	86.9516	83.9554	79.1181
SD=5	Sim74	82.3967	91.4154	84.0989	87.8685	89.8058	82.6533	88.2575	83.884	85.9145	79.7676	85.8406	88.393	81.4377	85.7643	84.5902	86.5623
SD=5	Sim75	74.6096	78.4004	83.0317	78.5311	84.1065	80.1501	85.1833	80.1041	79.8639	82.9657	81.7136	84.1742	78.6937	79.3568	77.5146	72.3907
SD=5	Sim76	84.0801	82.7607	81.6166	85.3072	81.757	79.8458	86.3976	80.8432	81.3789	81.1341	79.8352	76.3216	82.4991	81.8332	74.7785	75.3546
SD=5	Sim77	89.2598	87.0925	91.758	79.3393	87.1469	91.6507	91.5715	88.4091	84.9775	89.2183	92.9267	89.7823	88.5808	82.5677	86.7814	89.2363
SD=5	Sim78	88.0718	83.3901	84.7447	86.245	86.5797	79.5963	87.9612	82.4083	86.4724	82.723	86.7707	90.2648	84.983	88.0019	82.8253	87.633
SD=5	Sim79	73.4811	80.8114	81.3009	81.8592	79.1874	84.8746	85.1977	79.7173	86.6418	80.4225	77.0674	81.8649	80.97	81.9106	79.8438	75.3311
SD=5	Sim80	80.7806	80.8694	85.8283	84.1785	83.5267	77.0163	83.61	84.0147	75.8888	88.7142	82.8459	80.1204	81.6581	83.6884	79.5982	80.6129
SD=5	Sim81	89.2889	80.1749	83.4782	89.9507	82.6963	80.429	86.2777	91.3923	85.7211	88.9629	87.3451	88.237	84.8703	78.0236	91.0501	86.0737
SD=5	Sim82	89.5633	85.6364	87.2095	88.0969	80.5026	85.1484	85.5005	85.7135	88.3727	88.8392	91.6682	87.3296	85.3034	86.2492	85.2752	86.4893
SD=5	Sim83	91.1287	88.301	87.2973	86.8182	77.6001	84.0723	86.6707	80.0798	90.3235	84.9319	84.8122	92.8089	80.6935	89.0876	89.7525	89.8549
SD=5	Sim84	79.9401	88.3309	86.7093	77.7792	76.7516	83.7136	80.1524	81.8905	83.3823	88.0443	87.3312	85.1111	84.0871	86.3661	78.78	81.6602
SD=5	Sim85	81.9035	78.3615	85.9004	81.4877	79.2329	80.5655	82.4006	79.9244	83.1265	87.6706	88.1107	83.1941	74.123	84.0419	78.7393	84.144
SD=5	Sim86	84.3329	74.8284	84.3042	86.2173	85.5532	85.9956	79.0255	84.1328	85.6344	82.817	85.2956	80.8363	84.9674	89.6518	78.7472	74.6455
SD=5	Sim87	79.6699	85.317	88.3084	83.0736	77.9422	82.0784	82.5208	82.6726	81.5473	82.0358	80.1247	83.3119	77.3603	82.6367	78.0621	83.048
SD=5	Sim88	83.5795	81.4417	87.4289	87.5317	80.25	82.7077	82.2116	85.7642	76.4329	87.2737	84.0344	80.1442	75.6018	85.8676	83.3879	81.56
SD=5	Sim89	81.2284	83.3761	91.4634	84.1061	89.2314	85.6171	89.4516	84.6145	86.5943	81.3931	86.2173	83.4637	88.594	82.5899	87.5373	85.9882
SD=5	Sim90	92.2399	86.4025	81.2222	89.3917	89.7173	90.5055	87.4054	82.5789	88.1813	87.0244	94.8199	84.0578	85.6124	83.6016	86.0022	90.8895
SD=5	Sim91	82.7557	82.5769	81.4244	78.728	80.2646	77.5443	83.2359	83.3476	77.6944	77.3232	85.039	80.6946	91.3874	83.0939	80.2626	81.1034
SD=5	Sim92	91.0665	88.1107	87.4583	89.8628	96.9495	92.3123	94.7587	90.5449	97.1065	84.4185	91.6147	88.0778	90.1871	87.239	89.7371	89.094
SD=5	Sim93	87.2933	82.7335	87.1252	88.8764	91.3847	90.2727	94.2499	84.2077	90.4538	89.7765	86.3934	89.0298	86.2406	83.173	84.5349	91.8981
SD=5	Sim94	78.8511	85.2366	86.2292	84.762	81.3415	79.335	84.6099	80.1575	87.3005	79.7383	78.1811	80.3133	76.3767	86.4548	82.1742	77.859
SD=5	Sim95	88.1334	83.1555	87.6656	86.3573	81.9173	83.6473	84.0136	84.1542	85.9641	84.6001	83.2522	86.001	89.54	92.0582	85.1564	84.0475
SD=5	Sim96	93.4306	89.6166	84.6648	84.5081	91.288	88.1111	88.3786	94.6952	86.4811	90.6429	89.7412	92.7897	90.4069	85.9201	89.0194	87.9299
SD=5	Sim97	81.6245	85.5153	88.105	82.4626	79.1594	78.2462	87.7675	81.4975	76.3304	81.321	82.5413	88.1443	83.7876	91.9592	83.2257	87.7293
SD=5	Sim98	81.2043	78.2253	79.2266	86.5715	84.5091	87.2437	78.0024	83.3825	84.527	72.0554	81.2533	83.2927	80.4889	86.3669	84.44	81.3505
SD=5	Sim99	81.1959	90.4722	76.6083	86.2552	81.2153	86.5935	89.3483	89.6468	82.4707	84.5193	87.9444	79.4645	80.406	82.6285	89.5923	84.6765
Result	ID	DBP01	DBP02	DBP03	DBP04	DBP05	DBP06	DBP07	DBP08	DBP09	DBP10	DBP11	DBP12	DBP13	DBP14	DBP15	DBP16
SD=10	Sim00	77.7502	72.8075	81.4006	96.4383	86.66	74.5985	79.5753	79.5632	60.7986	83.1114	82.8294	80.9328	78.1035	72.772	73.3404	83.3342
SD=10	Sim01	80.3416	98.7648	91.4883	103.455	90.8341	91.978	83.9616	82.0168	92.7434	84.8534	98.5174	78.9298	92.6631	94.2854	82.9171	84.7168
SD=10	Sim02	85.1127	87.4109	78.1614	87.6809	83.7956	86.8906	87.7404	61.7225	86.9529	87.7681	87.3734	83.6143	89.5222	78.2725	81.9669	83.7942
SD=10	Sim03	89.1812	87.5258	98.5866	86.7901	94.1636	91.9929	84.2635	81.2856	100.625	81.778	89.6763	80.9649	75.0271	85.634	94.2946	92.9917
SD=10	Sim04	93.2643	87.9659	97.8599	99.9583	88.73	79.9177	84.8523	86.0722	86.5126	88.5074	85.5017	81.131	79.9403	77.6862	97.5822	100.058
SD=10	Sim05	93.3555	95.4112	91.3726	95.1094	80.0268	89.0662	84.8466	88.7599	86.9151	99.8302	78.3909	82.7182	86.4242	69.1926	88.4449	102.713
SD=10	Sim06	75.0916	77.4583	81.1385	60.8472	75.6514	74.9028	87.4862	84.8263	70.1237	83.5533	79.9255	74.8275	93.6154	84.8695	81.8184	86.8543
SD=10	Sim07	79.4954	93.3426	78.3525	90.7568	103.058	74.432	83.9208	91.7288	86.4575	84.1026	85.1635	87.1205	79.5654	91.8851	86.7784	78.7737
SD=10	Sim08	74.6644	83.0266	93.9323	79.09	88.3631	87.2667	85.036	83.1678	85.665	96.7834	85.4475	83.7991	85.0747	90.0242	82.5663	93.1516
SD=10	Sim09	82.097	88.2889	101.132	86.6435	97.8684	90.9001	86.6293	92.8776	94.1889	89.1214	100.118	86.4529	83.2866	90.1032	92.0418	90.6715
SD=10	Sim10	93.0387	82.116	85.032	91.2808	99.307	93.8336	81.5122	95.4855	108.52	86.2545	86.3383	78.4334	100.784	84.9735	85.3675	96.5637
SD=10	Sim11	89.4056	73.2528	90.506	93.0333	90.2167	90.2827	80.4688	76.2478	72.1787	78.5054	90.6004	80.1214	87.6785	97.4227	94.8793	85.7742
SD=10	Sim12	77.4274	94.3652	77.373	95.5545	89.6758	78.6474	87.2155	90.3485	84.7951	76.0408	82.9083	87.7988	88.4094	82.4868	76.563	75.0824
SD=10	Sim13	79.7622	79.1564	83.3201	65.7639	79.3864	85.4176	91.296	90.6523	85.7891	101.129	90.0666	93.6474	79.4046	83.7037	90.7891	87.554
SD=10	Sim14	84.0663	84.3606	74.6818	71.207	83.1855	93.5814	81.2511	76.8632	78.2809	90.3639	82.4596	78.9912	84.9974	70.9116	89.8576	61.2941
SD=10	Sim15	90.6647	84.3214	78.5694	86.5924	86.3817	78.7984	88.3279	70.4744	76.686	65.9497	69.2497	80.313	84.3679	76.4615	83.6323	67.7303
SD=10	Sim16	93.2529	84.3286	83.3198	78.8487	95.034	86.8251	89.7397	78.0354	90.8656	71.31	96.967	83.1559	86.2803	78.9785	87.9475	86.0389
SD=10	Sim17	89.6032	84.0981	77.743	85.8644	82.614	72.5131	79.7368	78.7486	82.1229	82.0292	71.7281	81.3735	85.5417	82.3954	93.2472	84.2646
SD=10	Sim18	86.1827	81.798	89.8422	85.9584	92.9078	89.9035	94.8054	92.1425	85.4498	89.0883	84.9339	105.109	90.6003	84.1246	88.8145	90.9134
SD=10	Sim19	85.7404	82.2085	80.6919	78.3585	87.8967	68.9642	79.3556	69.8291	76.4724	84.3581	72.5043	91.4775	82.0165	77.3488	76.5729	91.292
SD=10	Sim20	76.7208	93.459	76.5515	86.6153	70.7634	85.049	79.9543	81.6756	71.9994	85.8658	85.718	83.5162	70.2189	78.7473	82.4684	82.6988
SD=10	Sim21	95.3359	81.5359	82.788	89.3526	78.2365	98.5859	74.1349	77.5846	83.1568	84.9698	89.7428	87.3543	81.4788	86.207	80.9544	97.0503
SD=10	Sim22	80.8958	76.3482	91.4808	82.4548	90.2133	74.1213	93.7417	82.1918	92.3477	94.6037	77.9308	84.3052	79.2069	81.0613	85.382	83.4895
SD=10	Sim23	74.0022	72.093	83.7432	69.1278	91.088	66.9264	75.3811	85.394	76.3062	71.2854	88.3667	81.6697	85.3831	82.1284	81.944	68.0217
SD=10	Sim24	87.9467	92.8996	89.3303	88.8486	94.1677	90.0008	85.8411	91.0877	88.7791	88.2839	97.9283	86.69	89.091	82.8438	99.9553	70.3603
SD=10	Sim25	90.0601	93.6996	84.9658	96.6605	99.3327	82.1698	84.5414	81.5456	93.3777	88.913	92.1668	91.5362	96.8543	99.2962	88.4991	84.6868
SD=10	Sim26	86.033	86.9624	97.2216	78.5021	88.5381	81.9834	90.0149	85.1088	94.726	102.745	81.86	68.4591	93.2809	86.1005	81.9316	82.7077
SD=10	Sim27	77.9344	74.6949	77.9495	91.7695	94.3809	74.2688	74.8072	83.4624	81.9753	80.878	88.9812	82.4602	84.7093	82.3587	75.5298	75.1303
SD=10	Sim28	91.9338	81.6554	91.2054	90.5034	89.2878	94.7144	81.4341	67.6805	82.3208	82.0131	89.3047	83.4712	78.3091	85.5894	85.5001	81.5234
SD=10	Sim29	89.1063	82.9825	78.275	79.7361	84.7003	82.1163	81.9236	77.0917	93.0572	97.6456	78.9097	82.9647	85.9569	80.7845	92.5046	88.006
SD=10	Sim30	75.1909	86.8537	93.98	87.4774	84.1368	97.8497	85.9001	75.0068	83.789	85.0665	99.3114	83.8981	92.4362	84.5235	78.1017	75.8671
SD=10	Sim31	93.7086	78.2055	80.5445	76.8005	73.2676	80.6983	75.3139	74.4895	81.846	70.7135	82.9489	70.0625	88.9963	96.4772	72.5974	81.995
SD=10	Sim32	96.56	80.1593	75.667	71.9871	70.0074	76.7559	86.2058	69.6234	79.0136	75.8788	77.3185	78.9827	86.9028	79.0624	75.5122	76.204
SD=10	Sim33	86.0166	88.629	87.2044	79.4121	86.2571	90.0643	94.9279	97.9776	85.6306	77.6937	101.459	77.0097	81.7832	85.4986	99.2725	93.2728
SD=10	Sim34	91.6497	82.9255	91.6085	84.9596	105.895	89.9946	93.1853	98.0624	81.5982	75.9791	91.5923	82.5386	78.5913	90.5293	93.2352	104.664
SD=10	Sim35	85.0025	83.1469	78.5195	87.2367	61.6667	71.5835	84.0579	86.8378	74.4907	81.241	81.3011	86.1302	76.5657	76.8933	76.7088	86.8563
SD=10	Sim36	85.8809	95.1712	84.5487	87.0765	89.7809	79.7923	81.5036	79.0561	86.1895	79.1557	86.2739	70.8354	82.0192	87.6619	81.5726	84.1864
SD=10	Sim37	88.2515	73.4753	92.3207	83.0434	78.9781	78.8632	91.4847	86.1979	97.3571	84.3062	89.1939	82.6038	85.8125	85.776	90.5273	82.7532
SD=10	Sim38	84.9569	76.0832	87.5846	74.8943	75.9464	89.4464	85.1321	78.7298	84.8024	89.598	72.6546	67.5961	80.1989	88.4094	87.8896	82.5536
SD=10	Sim39	95.1279	78.4646	93.3073	87.1478	95.1328	77.2371	92.418	79.584	78.4735	80.2683	93.202	100.42	96.7415	99.7134	97.6633	74.3177
SD=10	Sim40	97.8627	94.2525	84.17	97.4621	97.4239	75.7929	83.8674	88.5662	99.2786	89.598	83.7892	92.6791	86.4274	74.7247	84.4528	83.0391
SD=10	Sim41	93.1672	81.5487	78.2647	78.9101	80.4361	62.5648	83.6355	89.3833	77.3969	82.1413	81.5865	94.2713	78.2936	79.3099	83.819	82.8205
SD=10	Sim42	89.7427	82.823	93.5448	88.5674	87.2812	83.323	81.812	97.164	83.9501	92.5259	94.9336	91.5767	83.8683	89.499	91.7099	78.7422
SD=10	Sim43	90.2477	96.8218	98.6824	85.9606	82.7869	86.1095	82.3053	76.2416	89.5266	84.2449	87.2922	92.0396	93.805	86.6297	93.6025	85.3372
SD=10	Sim44	94.0798	77.7847	99.2047	93.0856	92.2977	92.5842	90.4598	98.7843	77.7359	86.892	93.2388	95.3624	76.5821	90.8756	87.0286	98.6168
SD=10	Sim45	71.5418	81.7652	82.6134	85.5275	89.6743	78.3808	77.8406	79.8991	81.1037	83.0309	80.7646	87.9866	67.3537	74.1476	86.1988	76.7417
SD=10	Sim46	89.9813	75.9017	83.9643	86.3094	87.7765	91.8818	97.758	95.8982	82.556	85.4898	90.2706	78.0229	85.5883	83.3349	91.2581	95.5129
SD=10	Sim47	77.5646	79.0182	85.7232	88.2628	74.9918	76.749	85.2385	81.8813	66.9145	86.2721	85.8493	82.1288	85.6951	84.4072	66.7629	73.8567
SD=10	Sim48	86.1989	94.5235	99.7802	73.2333	86.624	103.44	98.3595	77.1957	90.1475	88.6326	96.1132	83.6191	98.2644	88.5367	92.804	99.8678
SD=10	Sim49	84.494	93.6806	95.7549	80.132	84.4236	88.0264	89.913	87.4707	79.518	84.7183	86.0801	86.9692	80.1282	78.5601	78.7014	84.5368
SD=10	Sim50	93.9275	96.5485	88.2818	95.5178	89.5623	88.6579	77.2899	83.7845	87.4481	87.4689	93.546	82.9231	81.4845	92.9485	91.8294	88.4169
SD=10	Sim51	97.2125	77.9118	72.5571	69.7558	84.4342	83.8466	85.5072	73.8819	72.735	81.5181	77.4864	88.5143	94.249	81.2731	75.9058	76.0436
SD=10	Sim52	83.0589	78.8971	93.7124	78.4492	87.9668	99.8788	90.0865	106.263	90.8053	96.9205	79.319	87.9643	86.5552	83.8363	81.5278	83.9965
SD=10	Sim53	87.3897	95.502	96.5967	83.5651	84.3167	104.229	93.3681	91.5912	79.83	80.7687	93.1228	85.7088	86.4192	89.565	94.309	85.1329
SD=10	Sim54	88.4329	73.7089	85.3453	83.8838	83.7767	81.4925	84.9539	81.0706	83.4172	84.6465	86.4776	95.4855	100.044	88.7269	77.758	81.0014
SD=10	Sim55	90.569	92.5291	93.9728	85.2663	80.5568	83.8512	89.6315	99.4029	92.5404	83.2117	94.273	91.2262	93.306	100.987	94.5927	85.6633
SD=10	Sim56	80.06	98.9675	79.8139	102.823	79.3009	94.5286	85.7556	81.2909	85.6357	83.1461	87.046	87.8855	81.6406	94.1707	95.4798	87.1567
SD=10	Sim57	93.6507	88.7042	85.6429	98.0942	93.7633	78.5158	82.1588	93.2317	93.5255	89.5969	88.4433	99.3748	76.1909	108.632	89.4379	90.096
SD=10	Sim58	92.0091	82.9647	84.5247	91.5532	78.0646	74.6588	75.1184	85.2263	80.6982	78.7472	78.166	77.0384	68.0905	89.0367	78.2392	86.5238
SD=10	Sim59	85.9805	89.3633	96.0407	89.3151	94.9653	84.7786	76.9248	94.455	81.066	67.2994	82.1418	74.5696	75.9294	75.2863	95.047	62.7719
SD=10	Sim60	88.1611	96.9282	80.776	92.0735	90.9012	79.8838	85.673	92.5694	92.0765	89.3366	93.2564	91.0078	93.1941	83.7564	73.3835	103.677
SD=10	Sim61	83.0378	94.305	77.2264	83.6159	91.3826	86.3268	87.0187	80.5452	84.5855	86.1599	99.0124	87.6969	89.712	89.6351	84.3893	78.3532
SD=10	Sim62	80.6074	78.6325	77.6976	93.5211	93.3284	85.0104	89.9877	101.125	82.6453	81.1553	84.4108	77.6472	85.3838	88.4013	81.3996	87.7434
SD=10	Sim63	89.304	90.0116	84.7053	85.5971	96.8374	84.7648	92.1294	91.9379	87.126	81.5626	92.7192	95.1963	85.8228	90.1792	89.6773	85.3185
SD=10	Sim64	83.1376	84.7984	87.0058	87.3944	77.9607	83.2392	75.6294	88.2248	91.0888	81.0543	84.532	83.4043	93.675	83.7573	96.3807	88.0889
SD=10	Sim65	96.6235	83.0497	92.8756	91.2215	110.562	97.028	91.316	90.8516	92.861	82.6829	83.4727	87.5954	85.0434	90.6371	99.492	89.386
SD=10	Sim66	82.8276	94.519	88.022	92.9412	91.7404	84.5972	78.0956	86.3246	87.531	90.132	81.7286	84.1474	98.3171	89.4565	97.7956	94.1516
SD=10	Sim67	81.5394	68.0146	90.3208	83.0141	78.1407	76.9463	82.6099	81.0804	82.0809	94.3003	77.0951	75.7573	76.9137	81.6247	82.2402	75.958
SD=10	Sim68	78.1937	74.8917	86.9841	77.2513	78.4167	87.4442	75.8354	71.3601	90.6742	80.9418	87.6553	84.6742	80.1112	85.4074	74.199	70.2988
SD=10	Sim69	87.8849	89.1615	90.6458	82.5916	85.9956	93.0126	89.2523	90.7142	94.4518	79.7288	89.6428	86.0563	79.9213	97.7217	84.3049	89.3883
SD=10	Sim70	83.7621	90.7457	87.9172	78.6834	92.1683	88.5501	95.196	76.1166	89.9613	91.555	81.4984	82.1206	78.5003	77.6249	88.1342	83.0435
SD=10	Sim71	79.3193	89.4428	81.6059	98.2464	90.8594	87.6745	82.7811	87.8626	82.2313	76.5736	90.2434	92.6352	91.1819	77.0558	83.9896	79.6611
SD=10	Sim72	89.0038	107.328	91.9767	89.9928	91.5758	93.3267	86.7421	88.0753	99.3028	78.7634	93.5257	86.375	97.8195	88.5278	86.7439	90.2897
SD=10	Sim73	73.6474	85.759	73.5541	76.5668	87.1832	80.443	73.3835	76.9063	81.4231	68.6526	78.366	91.5573	83.2206	82.554	77.4569	82.0065
SD=10	Sim74	90.8097	78.4044	80.204	87.5516	78.6988	83.3867	89.566	84.7678	74.0845	93.147	95.211	93.4103	77.3115	83.0889	97.5289	93.3574
SD=10	Sim75	75.8678	71.1537	74.8517	84.6302	92.1769	84.3849	63.9527	76.4199	92.3604	76.4648	89.9219	78.2441	72.7503	87.7221	75.4576	85.9609
SD=10	Sim76	82.0205	79.5616	88.8219	82.4163	82.7997	78.4943	85.6048	72.967	67.4574	72.3139	72.4085	97.0335	68.1422	76.6623	70.6088	81.3474
SD=10	Sim77	77.1383	95.7913	90.4743	91.4909	86.9774	87.8733	94.5736	97.2643	87.1015	92.9476	99.9961	91.2967	85.593	88.0661	90.4734	76.77
SD=10	Sim78	74.3855	84.15	81.7651	81.1855	84.6585	90.8671	89.6501	87.1507	77.1681	66.5653	91.8156	86.1898	92.5985	74.9314	90.3468	80.5686
SD=10	Sim79	97.9538	81.2629	83.2606	80.5106	82.1845	75.9874	73.8532	59.2667	85.5005	82.0959	92.3609	69.2726	82.6885	79.3475	99.881	83.7889
SD=10	Sim80	77.0077	87.5455	77.9905	77.1421	80.3489	79.7843	77.9425	81.9527	89.6948	81.9272	80.881	82.606	79.582	82.6616	75.1017	86.0772
SD=10	Sim81	80.3578	77.3491	83.1765	84.4771	81.2358	68.4841	69.1569	87.5234	83.3893	86.9855	94.0414	87.7583	86.3203	89.4194	97.4166	86.7792
SD=10	Sim82	97.9597	86.2636	78.459	86.1996	86.5794	84.9677	79.524	74.4766	85.131	80.1766	79.6129	66.2106	84.0469	87.1999	95.114	86.8795
SD=10	Sim83	82.7278	97.5693	81.4003	101.761	91.7116	71.6052	73.5737	89.6827	83.2464	99.3806	83.2732	89.2691	85.0792	87.8944	82.7859	101.321
SD=10	Sim84	87.4762	94.056	81.8618	77.9216	85.0414	90.4745	69.8807	84.4187	82.4186	87.3671	84.3035	72.4931	69.89	91.9651	85.0355	76.9742
SD=10	Sim85	82.5047	77.7813	93.8012	93.4295	80.7148	65.9276	96.9087	73.4667	87.9746	82.3016	75.5104	83.1313	93.0608	78.4931	83.2132	78.9417
SD=10	Sim86	81.0957	70.8462	82.3787	90.9193	84.1441	90.1001	79.9979	75.6859	81.9403	77.456	71.8567	88.5587	84.3912	87.0805	78.9207	91.7365
SD=10	Sim87	73.6052	77.3538	78.8142	74.6766	80.3351	83.8436	93.2162	96.477	80.3607	92.1575	90.1277	70.3548	81.9344	82.5194	81.4137	73.9264
SD=10	Sim88	77.2686	85.2143	87.6017	75.9338	86.7019	88.8775	84.9356	68.6722	81.1451	70.6692	68.4034	90.1502	80.7988	80.7815	76.9853	80.0513
SD=10	Sim89	76.8177	76.5808	97.9608	87.0075	81.2321	72.979	88.6171	89.0496	89.578	79.0141	86.9462	82.5749	86.5481	76.9327	83.7359	74.8834
SD=10	Sim90	90.5507	85.6446	82.6004	80.8935	86.2648	82.4569	79.5451	85.2812	72.2112	94.6477	101.049	84.4336	84.3416	76.881	79.8837	85.4252
SD=10	Sim91	76.0546	80.021	84.2177	80.8563	94.0059	68.2268	83.9661	71.0892	80.0268	92.2583	90.1854	62.525	76.9437	81.458	92.8147	70.6688
SD=10	Sim92	84.0229	93.7909	85.4365	90.643	88.0136	100.971	98.4703	81.9646	83.9521	90.6641	92.2786	77.6586	94.4243	93.2596	76.8201	103.987
SD=10	Sim93	89.5768	89.6827	89.3306	83.7457	79.4549	90.3346	76.3315	105.906	85.8558	85.4134	83.6106	89.6093	97.32	88.2943	83.1288	88.223
SD=10	Sim94	82.2399	85.6102	89.2266	86.0889	82.8026	84.065	84.5087	86.2178	79.1078	81.5395	91.9782	88.7877	89.4485	84.7914	84.7841	90.5014
SD=10	Sim95	80.7674	88.2508	86.133	85.1128	94.5296	90.193	94.9359	69.4115	93.7126	82.233	86.9741	98.3652	95.6116	94.5055	82.6176	96.8507
SD=10	Sim96	90.5192	90.5859	85.7259	91.6383	77.8879	86.5615	88.3772	75.0471	90.4248	84.8411	90.089	90.9944	91.7873	89.6775	75.5547	90.9114
SD=10	Sim97	91.4093	78.5037	88.5973	80.5133	79.7895	82.4159	85.888	78.9146	84.7121	81.5773	75.3346	76.8712	77.2513	87.8484	89.0897	93.6736
SD=10	Sim98	76.102	78.7526	79.5345	72.0265	78.6786	84.8626	89.0119	68.1342	73.2235	81.1489	82.1611	83.8717	69.7796	83.6353	83.9756	80.4527
SD=10	Sim99	76.2039	87.3921	77.1046	82.1849	85.5258	81.6893	92.1515	88.2102	83.8354	73.9148	89.4596	84.9443	89.1965	84.9704	86.068	89.7949
Result	ID	DBP01	DBP02	DBP03	DBP04	DBP05	DBP06	DBP07	DBP08	DBP09	DBP10	DBP11	DBP12	DBP13	DBP14	DBP15	DBP16
SD=15	Sim00	81.8709	99.1468	61.7548	83.1823	80.53	59.287	76.9643	86.1516	84.6581	77.1467	83.7507	77.8864	77.27	77.5697	83.7998	73.0029
SD=15	Sim01	83.9087	69.3258	81.0123	83.6719	83.359	123.345	66.7178	107.943	95.1391	100.386	82.2417	87.6149	88.4687	83.2472	106.414	86.169
SD=15	Sim02	104.392	86.3182	98.4327	67.5571	84.9511	83.3018	67.3691	70.7525	85.3386	88.5258	70.4217	85.3647	76.7704	94.9052	70.3322	68.5762
SD=15	Sim03	89.2012	104.893	89.6955	88.6992	64.6519	73.7487	86.0078	88.1202	81.2667	88.971	107.575	85.0434	85.1493	61.9739	71.4675	87.4761
SD=15	Sim04	74.254	104.022	94.9777	64.056	89.7869	92.2912	87.025	104.872	92.0505	81.5057	67.163	80.7108	74.3429	85.4789	83.0477	83.4058
SD=15	Sim05	97.8026	96.1393	73.7016	80.6107	78.9147	82.2365	94.8197	85.3097	102.095	91.5662	71.1482	97.3137	111.798	79.0358	92.127	91.7544
SD=15	Sim06	72.0586	109.451	91.168	77.1958	99.3728	103.368	80.2783	78.6067	69.5681	52.4993	69.2897	90.4233	80.2824	87.0227	82.1318	82.9174
SD=15	Sim07	81.0482	84.3575	86.4187	100.61	79.3105	72.9087	91.9774	84.6616	91.4914	78.5167	86.516	90.4765	97.5851	81.0125	80.8968	92.9695
SD=15	Sim08	96.0695	68.2333	77.9548	80.5207	82.7654	76.8991	81.4765	102.195	104.753	98.2871	93.7413	71.6954	82.2139	73.3036	80.8162	86.1924
SD=15	Sim09	90.868	84.1775	106.165	80.6201	103.518	81.9456	85.6881	104.903	100.679	79.1054	86.3431	78.1258	87.7238	116.063	95.7618	91.662
SD=15	Sim10	87.9026	62.4039	64.1074	78.1485	99.6845	74.4303	90.8187	90.718	105.189	80.9431	81.2567	92.7658	78.0813	82.6079	94.2581	96.1374
SD=15	Sim11	86.5025	75.2053	98.9041	105.641	85.5695	75.5157	91.3525	91.3007	82.7105	72.2079	60.833	75.2772	93.4724	65.8275	72.8172	89.0621
SD=15	Sim12	78.1005	83.1292	71.6448	100.385	76.0988	98.338	74.6569	93.0557	87.4935	87.9285	72.7098	80.044	82.1	95.5182	91.8179	88.2344
SD=15	Sim13	74.5553	105.467	80.5697	100.564	83.5806	62.1937	106.349	99.7367	90.45	95.9297	91.49	85.9059	91.3229	79.9259	92.1806	88.0643
SD=15	Sim14	67.2086	78.0683	89.9785	90.3668	69.9792	57.235	85.7455	75.6898	73.1151	81.9955	77.8762	71.9181	66.5195	76.9356	69.9004	82.0974
SD=15	Sim15	78.4178	84.3416	77.1497	86.1471	76.8207	66.504	78.6604	81.7325	60.6585	78.3769	75.2618	69.922	84.9438	88.2447	79.1998	64.7889
SD=15	Sim16	88.7693	84.5458	70.2114	83.5863	102.29	92.7412	98.1769	75.7136	71.3792	77.6272	86.9485	95.7857	74.2904	87.8744	72.793	96.1527
SD=15	Sim17	70.2754	77.2969	81.4655	82.7897	67.3423	80.6944	81.8281	75.357	77.5971	100.578	103.274	92.7039	73.6962	94.9476	95.0381	78.3899
SD=15	Sim18	119.184	99.8908	86.8224	80.8287	85.9937	101.317	100.87	88.9555	80.6547	105.422	105.784	86.778	96.054	91.3827	73.2854	99.2083
SD=15	Sim19	93.3786	77.1846	65.2459	80.8004	68.222	90.944	89.753	90.6637	91.1732	101.658	66.6137	100.511	62.0435	96.4586	74.1904	84.8375
SD=15	Sim20	69.8775	96.778	106.516	68.0761	76.8381	78.4359	81.2804	98.2706	69.2757	99.6799	60.9768	89.3589	73.787	81.4526	85.8532	100.671
SD=15	Sim21	71.9742	118.194	83.5341	82.2251	89.3986	75.327	87.2699	89.6691	90.9457	76.095	71.598	63.0499	79.3588	83.4656	96.794	86.9811
SD=15	Sim22	88.982	67.1037	76.8336	107.388	72.7208	86.2376	83.4203	68.6791	87.6575	73.4719	85.9739	69.0354	86.2099	86.0306	80.2738	92.4069
SD=15	Sim23	92.7733	84.5133	73.7459	80.4148	80.9935	51.4714	101.102	70.223	89.6079	80.8526	71.6358	94.4506	73.8366	57.0814	74.8335	79.9865
SD=15	Sim24	93.1658	76.0234	88.7102	94.7936	94.7219	77.5386	107.719	102.748	93.84	94.0015	90.0427	92.4915	70.5925	94.8688	75.256	87.2457
SD=15	Sim25	84.7878	64.5526	96.6826	92.0258	96.2384	84.9005	92.706	84.4375	88.86	76.3437	85.7849	107.555	89.903	102.698	103.782	83.6221
SD=15	Sim26	80.3319	97.3715	80.6256	98.0527	79.4124	74.2843	75.4046	78.5218	97.9099	72.1784	102.479	82.8485	95.3809	62.3502	78.0084	106.02
SD=15	Sim27	76.0316	77.195	93.3588	97.1846	87.1401	67.1356	75.4671	80.6138	83.9577	105.211	89.7381	64.9061	107.934	91.8454	72.6914	67.2497
SD=15	Sim28	77.1575	75.0755	80.1287	89.2375	81.9936	80.6065	84.6911	78.0884	81.4594	47.7067	67.4217	85.9384	97.0863	81.6765	74.5269	92.6018
SD=15	Sim29	91.3412	93.7992	84.0279	86.7555	79.1609	63.7268	83.0512	82.5007	94.047	86.086	87.9303	85.3603	79.7037	85.3852	88.4881	74.4712
SD=15	Sim30	87.9744	91.9996	92.8455	92.7325	106.176	76.476	88.2462	75.5941	92.8994	101.311	80.8821	69.0692	100.583	85.2157	99.5098	92.2399
SD=15	Sim31	74.5269	72.7631	91.8219	64.986	78.3617	85.1777	82.5287	76.7081	78.0817	102.865	61.4426	67.9094	64.8946	82.2477	58.5156	61.7962
SD=15	Sim32	83.7329	79.3145	92.4655	72.1247	75.0883	94.4282	57.6043	85.0895	78.5185	66.3107	96.6644	84.9879	92.4729	94.6267	71.2296	75.0669
SD=15	Sim33	81.6493	102.138	88.7491	85.5251	96.9393	109.175	84.9764	96.7915	95.7356	93.1374	88.9702	83.641	95.9708	75.54	100.815	87.8565
SD=15	Sim34	63.6483	98.552	114.72	75.8218	95.3328	96.0969	91.741	98.0967	94.0487	73.0336	110.005	96.1955	81.3833	82.7611	90.5896	84.3018
SD=15	Sim35	72.8033	69.611	68.3429	69.6445	65.7105	66.3808	79.276	76.9638	59.9884	80.9599	86.6598	85.1033	77.6706	61.9769	73.7376	71.3388
SD=15	Sim36	89.8194	84.8417	89.4739	95.8913	83.6427	87.9425	88.4111	76.942	86.2725	85.9863	87.403	77.0992	89.8082	82.5473	93.4562	90.4425
SD=15	Sim37	87.0844	75.1053	51.5185	86.3972	64.797	70.1729	106.933	83.3378	89.4316	66.6165	79.3234	94.1978	83.6655	89.5761	91.061	97.8313
SD=15	Sim38	88.5728	75.1054	89.0952	69.9156	68.9436	68.1647	61.6641	101.642	88.4356	81.4359	78.3265	66.4894	96.0348	70.8196	86.207	84.1406
SD=15	Sim39	79.1692	67.4748	95.7108	94.1975	81.1898	89.383	103.085	92.0444	79.3847	89.8352	75.1473	83.6383	108.336	82.3257	81.0994	99.2444
SD=15	Sim40	87.7222	74.7604	73.9238	70.4742	77.1708	89.0317	82.2699	89.973	80.5355	69.8457	83.7602	86.2738	100.505	72.4135	73.6329	70.7246
SD=15	Sim41	86.3575	80.3169	86.7342	74.2542	69.6099	86.8866	80.4281	96.7209	91.2362	88.2098	74.7871	99.1618	72.2519	94.9779	87.0128	78.9381
SD=15	Sim42	73.4077	84.8689	71.6591	87.0219	96.348	102.167	82.9794	98.2555	95.5598	93.2967	93.7909	105.745	89.5504	92.941	97.3921	73.8746
SD=15	Sim43	101.493	89.2113	107.083	92.6143	95.5927	86.9659	90.9627	114.69	99.9209	87.1953	71.6124	82.3556	80.1634	84.7983	73.1129	93.064
SD=15	Sim44	84.4033	91.7371	122.961	88.9187	82.4152	92.7955	95.7948	99.4036	92.6193	70.6589	87.2446	91.997	95.8493	98.4563	79.0642	82.2152
SD=15	Sim45	80.5445	90.3308	68.1172	88.355	100.565	78.4836	80.4669	88.4583	80.6383	84.5913	62.1119	75.5784	98.1045	65.1713	83.3199	99.1613
SD=15	Sim46	93.1842	94.8742	101.172	74.6973	93.3499	80.7752	70.8652	94.0795	58.1824	112.626	100.088	77.5638	100.63	100.055	84.3614	93.375
SD=15	Sim47	71.7975	63.7591	86.1876	72.0953	65.3705	93.2572	87.0824	80.3716	90.7136	77.7537	83.2725	95.797	64.9441	87.3812	79.2011	69.0471
SD=15	Sim48	69.2049	84.4189	88.6217	102.764	85.6775	88.3289	101.296	96.7713	79.0149	68.7767	74.1572	75.1633	70.5851	102.399	99.5078	90.9845
SD=15	Sim49	92.1079	97.4203	98.7335	77.5874	78.1272	79.3373	85.5966	88.7972	77.3467	91.2772	78.0292	63.4219	79.1008	80.5025	82.0632	79.6531
SD=15	Sim50	94.3965	87.3733	83.2022	78.5109	74.6028	88.2069	88.7691	104.743	78.6705	80.6845	80.9722	94.344	99.2028	85.5983	96.7339	83.2698
SD=15	Sim51	77.7002	84.3334	96.8034	70.6228	77.7339	80.786	87.124	71.8779	84.5617	79.2277	79.5252	61.0383	69.4804	89.4098	89.1869	74.6214
SD=15	Sim52	72.5459	82.0365	86.9869	85.5063	73.2335	82.1338	74.9022	84.7399	101.12	86.2839	78.2734	102.836	98.8935	92.8003	67.6386	65.9901
SD=15	Sim53	72.4745	82.0711	89.0594	94.8291	103.6	91.662	80.9059	84.5352	98.5083	101.585	82.5166	79.2439	94.4179	95.6948	87.6984	107.672
SD=15	Sim54	100.813	75.6463	68.378	82.3842	75.6312	83.3143	73.2258	76.5837	88.8604	85.7908	77.1567	98.9615	94.6951	93.8105	95.3839	100.251
SD=15	Sim55	92.3458	97.3108	102.876	74.6669	90.6066	77.7585	72.127	85.9905	103.28	74.4152	100.327	91.4101	102.875	80.443	76.4546	94.9533
SD=15	Sim56	91.5456	74.554	108.332	95.6274	86.5518	101.733	82.2318	94.716	80.4896	87.1984	105.2	71.137	94.9704	72.4785	93.4197	73.1513
SD=15	Sim57	75.7079	85.145	96.3516	90.6422	108.599	82.8151	98.6848	83.0352	84.4946	94.3822	81.0753	69.3843	83.7261	75.8147	93.1269	90.8166
SD=15	Sim58	82.6832	86.4428	78.0119	82.589	93.1663	78.0076	97.5914	71.6818	61.4586	89.2931	75.6038	100.982	67.8232	87.8816	90.0152	72.9981
SD=15	Sim59	84.0743	81.4568	92.6938	87.433	89.2898	93.3786	72.1336	75.9528	90.6977	71.0503	71.86	81.903	69.3967	75.5847	89.7504	70.959
SD=15	Sim60	100.404	79.9832	88.2609	98.8401	79.2217	85.1193	69.0224	81.9114	98.7567	78.7244	94.3665	94.4191	100.812	92.1679	93.9294	92.894
SD=15	Sim61	90.5731	73.5704	67.4066	91.8519	86.0146	95.0852	110.485	75.9386	79.3107	73.8639	89.5801	73.0457	77.1783	86.1207	73.6742	81.185
SD=15	Sim62	74.7249	82.6758	84.654	87.1228	105.301	93.8383	93.1806	94.9885	83.552	82.1429	78.5556	71.1649	99.6057	88.6806	87.8981	85.3917
SD=15	Sim63	111.771	85.4127	87.6671	91.061	113.979	76.9607	88.5311	108.899	96.7553	94.3973	95.3218	107.711	90.5596	94.3055	95.9487	96.6328
SD=15	Sim64	92.7579	84.5739	96.6259	82.5024	82.6185	82.6007	65.3369	91.3646	77.7731	87.4967	94.2351	102.507	88.6742	90.4543	76.9768	89.2689
SD=15	Sim65	87.9112	87.5438	90.9526	89.9456	94.1261	93.192	78.772	97.5174	81.0664	105.36	87.5128	78.3225	99.4648	94.5619	89.7654	96.3898
SD=15	Sim66	81.4358	86.9688	79.8481	95.5327	101.782	87.5337	71.8868	83.4786	76.3459	84.0416	81.5581	86.2629	71.0508	89.258	96.6383	82.084
SD=15	Sim67	91.5402	60.9458	79.0644	88.1001	78.4221	78.7694	94.8734	62.7462	112.565	72.9197	94.0736	83.369	83.2262	91.44	76.3416	92.6008
SD=15	Sim68	81.3428	80.0964	86.1767	92.8632	83.2532	86.6674	101.341	97.8283	67.3759	85.0305	89.7153	80.3432	85.1756	91.5331	101.402	81.895
SD=15	Sim69	92.962	89.3271	77.0242	93.1028	93.5924	82.9817	70.4594	89.3408	85.2588	88.9762	85.3071	89.7503	94.6906	99.9448	90.2867	74.2017
SD=15	Sim70	90.1781	81.4295	74.3264	107.088	88.796	98.0295	110.264	63.6563	86.8084	68.142	91.0118	84.9812	86.9458	86.9419	84.1862	80.8798
SD=15	Sim71	79.7678	80.986	80.731	102.918	89.6744	84.8934	99.0716	95.4219	90.66	80.8618	94.8891	76.8003	91.607	67.4087	79.306	89.5487
SD=15	Sim72	81.2175	107.2	78.5257	86.042	89.4598	96.2794	72.4939	97.3163	83.0746	72.8329	114.359	99.3994	109.441	100.589	94.0028	101.693
SD=15	Sim73	88.6611	82.2153	77.4876	82.8599	80.2267	84.0735	67.3027	85.603	101.167	91.1745	88.0327	84.2738	92.1718	85.5579	80.7111	76.9187
SD=15	Sim74	83.8825	84.5899	90.345	80.9843	92.3104	74.5427	74.3736	105.082	90.493	77.4574	98.4386	66.7742	104.71	97.6983	103.565	84.0528
SD=15	Sim75	83.4011	68.741	86.7188	75.87	80.6317	77.3226	88.8258	90.212	60.2726	93.2983	89.3366	73.7755	77.8389	78.767	94.107	92.3239
SD=15	Sim76	81.5154	79.9408	110.622	86.2669	83.5225	70.1276	75.3337	91.1592	81.7467	60.0212	106.806	90.404	76.645	85.0357	79.6074	85.6914
SD=15	Sim77	72.0168	69.7606	77.433	95.6829	96.7355	85.1482	86.1625	77.039	84.6313	100.521	93.6887	75.7596	103.332	90.3643	107.302	111.918
SD=15	Sim78	88.6163	97.6535	71.0553	71.7919	81.3276	74.4013	82.1529	97.4535	80.122	85.6282	83.3247	97.6	84.1277	97.9824	72.0115	97.9879
SD=15	Sim79	74.7862	98.9312	90.76	86.6822	59.7492	80.5645	81.289	79.1566	98.6602	87.5742	76.8505	70.2985	80.4182	81.3869	74.4962	84.7129
SD=15	Sim80	90.4372	69.5019	95.4087	80.6743	81.0544	93.4096	104.82	77.4273	88.1413	96.4819	81.3666	97.4179	77.2834	82.8188	82.9558	87.4011
SD=15	Sim81	91.7899	81.8344	96.914	87.196	93.4292	91.307	87.6001	67.7748	79.4337	90.0013	64.8188	105.727	86.0146	97.5109	87.0767	88.2004
SD=15	Sim82	85.3086	75.5583	77.1585	99.445	77.3089	87.953	90.7662	88.0211	81.7049	89.3646	101.499	83.3238	72.8548	79.4292	87.4056	96.6027
SD=15	Sim83	82.9932	77.8128	86.6024	104.153	101.061	91.2952	98.5842	91.6705	92.5901	80.4631	77.7348	82.0608	76.2656	78.8256	100.805	78.3796
SD=15	Sim84	95.1721	80.4496	92.1586	67.9183	105.342	83.6453	77.3077	82.6279	106.057	97.5324	83.8569	88.3759	93.1094	103.736	84.7695	84.6478
SD=15	Sim85	72.5682	77.341	81.3151	96.5947	103.524	72.1666	92.9443	74.7447	78.8692	94.1815	76.6949	90.6191	50.7294	91.4763	91.4962	82.3342
SD=15	Sim86	69.7063	66.9528	72.7727	82.5573	99.7943	81.7443	101.684	93.7992	87.3646	85.2106	81.6436	74.0596	92.3857	65.8838	84.3763	78.5356
SD=15	Sim87	65.0783	106.587	72.7969	70.1699	84.3215	81.4695	90.225	90.784	80.2847	87.9016	81.1542	82.4847	84.7472	91.7889	70.1402	68.8684
SD=15	Sim88	85.6465	75.6279	94.9697	72.5733	75.5693	87.2032	87.0129	70.76	81.7302	78.7464	84.6986	65.6832	76.6793	83.3999	72.4842	82.2233
SD=15	Sim89	104.41	95.9753	81.4779	86.7429	86.7228	89.5268	88.3577	78.1199	89.4714	104.323	87.9179	86.4454	78.528	71.1614	81.0238	89.4823
SD=15	Sim90	90.2154	71.7148	92.3113	104.32	84.511	105.219	82.9171	95.6211	87.58	94.1709	112.629	90.589	78.0295	86.4738	86.4777	86.8349
SD=15	Sim91	87.9693	72.2096	65.8256	67.1286	67.9378	72.9656	71.3285	83.1454	79.4069	78.4595	57.4887	85.5912	65.3991	70.167	77.9903	74.3941
SD=15	Sim92	88.8793	75.2007	86.0899	79.0508	94.7444	99.8481	92.3873	77.9124	89.9823	84.2024	98.8731	74.7574	78.6057	84.5316	81.4086	94.645
SD=15	Sim93	92.9847	80.2955	82.1191	84.1476	90.2888	79.131	68.7483	84.9066	75.8726	82.0515	74.2156	99.763	103.095	70.0181	82.8906	71.5912
SD=15	Sim94	81.225	70.513	79.7132	94.7069	74.864	64.5721	98.5729	75.9034	85.3552	79.9848	110.91	73.075	68.1345	62.5909	81.7633	77.7445
SD=15	Sim95	54.8801	88.0858	93.4804	81.7207	74.3502	101.59	75.6098	92.9476	82.8486	81.7673	66.1501	96.0554	81.9268	66.3869	73.8694	82.4395
SD=15	Sim96	86.1485	81.582	77.4856	72.025	94.0583	95.2429	85.4023	100.815	102.351	89.257	88.6076	89.9911	80.2014	97.1318	69.9642	92.4791
SD=15	Sim97	74.3639	87.9673	75.5855	89.5257	97.8578	91.9544	91.3072	78.5049	88.8453	81.8803	97.1181	81.8317	86.2612	88.7257	69.7588	64.7806
SD=15	Sim98	105.285	107.895	82.842	90.118	78.0808	82.0994	77.2279	79.2955	67.9876	75.7198	99.3082	70.3897	75.4821	80.2934	100.629	72.9073
SD=15	Sim99	82.7583	76.8066	87.1177	81.5208	86.2519	83.3481	95.0778	87.6748	90.0676	83.1979	82.001	77.2461	73.8063	80.0203	103.555	114.036
Result	ID	DBP01	DBP02	DBP03	DBP04	DBP05	DBP06	DBP07	DBP08	DBP09	DBP10	DBP11	DBP12	DBP13	DBP14	DBP15	DBP16
SD=20	Sim00	43.2831	66.8596	72.6288	71.8112	76.9356	80.4499	112.554	96.8676	70.6289	77.1798	96.935	39.9786	102.768	87.397	80.5931	91.3823
SD=20	Sim01	80.6471	95.5504	116.162	57.3599	66.3685	86.4454	77.622	78.7256	76.8011	76.6914	96.5587	79.1548	121.81	81.8189	63.2105	90.4846
SD=20	Sim02	110.818	105.522	90.175	85.326	70.9435	77.3207	102.964	78.7927	80.9262	95.7329	107.147	76.1333	75.0319	86.7919	123.792	73.9626
SD=20	Sim03	75.1675	93.7378	82.8538	97.0698	76.1856	92.938	78.2048	66.108	90.4089	91.9897	108.146	88.0853	95.9666	79.1937	76.9131	99.0208
SD=20	Sim04	63.13	96.8236	81.7563	87.2574	79.7695	99.0579	94.83	70.8479	70.4325	92.875	103.301	83.7939	64.7361	100.467	99.7324	91.7034
SD=20	Sim05	57.3715	82.1639	74.838	118.969	68.6054	77.528	65.3115	86.7202	99.2894	82.8231	96.537	93.1124	84.4769	105.433	73.5544	95.6945
SD=20	Sim06	81.8094	82.3552	112.174	93.7594	102.738	93.1743	66.5559	110.03	86.2578	77.3914	86.3576	85.6454	72.4977	66.5096	61.9232	88.0604
SD=20	Sim07	48.1543	84.639	73.0022	63.5238	73.2688	94.9071	79.0365	73.7368	70.9379	83.2564	95.7152	88.5385	71.6705	69.763	102.821	104.821
SD=20	Sim08	101.672	45.6624	96.3859	102.174	74.7152	89.3589	92.561	80.2762	105.775	94.8643	105.032	90.242	85.8104	104.249	77.6628	102.871
SD=20	Sim09	103.311	95.4475	89.2488	75.8432	83.6459	78.2578	108.021	108.439	68.158	88.178	86.9527	103.354	89.3818	97.0223	88.5525	79.5114
SD=20	Sim10	74.3188	84.9455	101.995	96.774	106.778	81.0185	99.4382	87.0461	85.2324	86.2537	94.962	57.9999	98.1376	69.9896	90.9977	69.546
SD=20	Sim11	84.6909	78.8477	72.1876	101.828	63.3666	78.2393	103.486	86.7764	109.306	95.4483	85.5705	105.643	111.274	80.2593	97.4383	64.7151
SD=20	Sim12	73.6597	105.477	93.5217	94.3453	85.1403	77.4924	81.2884	70.6943	72.5635	73.1607	87.0201	83.2079	83.1462	58.7191	101.646	76.4709
SD=20	Sim13	75.0117	100.26	68.4686	102.883	108.27	103.751	110.679	93.5207	74.281	71.0105	67.2957	104.785	74.3549	76.9607	63.9266	75.6099
SD=20	Sim14	65.8147	68.7468	91.5428	88.2393	90.9986	77.1056	80.8682	60.1899	91.8472	101.537	95.7902	72.9206	97.9113	80.0751	91.1787	68.0553
SD=20	Sim15	98.8111	82.388	56.1027	68.8843	102.041	43.3277	94.2334	102.26	101.9	85.5762	78.9415	90.2623	85.1201	77.0975	85.1309	72.3507
SD=20	Sim16	89.7495	76.5745	112.776	85.7225	77.351	78.7098	70.2085	86.1213	82.2307	99.2467	70.7941	98.2586	90.0038	69.4643	89.3299	74.6591
SD=20	Sim17	67.4595	88.662	87.9444	89.7342	78.4118	80.1582	76.8646	119.2	111.601	54.3401	71.9649	77.6154	83.1222	89.4126	109.217	81.6505
SD=20	Sim18	83.6318	87.7172	107.123	69.3723	105.367	79.8166	70.1775	68.7632	108.071	92.0239	95.0404	81.7228	83.8941	99.3968	96.5742	86.3283
SD=20	Sim19	92.7613	76.8494	90.0629	71.6324	75.3091	60.6682	73.8507	79.5419	85.0507	70.0564	90.0208	106.81	92.2121	103.205	88.5647	76.5026
SD=20	Sim20	92.7216	91.9317	89.7223	81.4026	103.823	76.2917	82.2981	93.3104	88.485	106.776	94.8853	66.6531	111.219	86.8343	91.8518	92.09
SD=20	Sim21	84.389	68.5551	83.028	89.8816	85.184	95.607	76.2173	95.624	109.446	62.7636	90.7767	83.1842	65.9796	100.409	68.8764	90.6974
SD=20	Sim22	45.9665	91.0936	107.24	75.9573	77.0595	100.959	109.489	84.7048	98.6075	113.994	81.7625	103.721	96.4017	110.895	94.7252	97.0349
SD=20	Sim23	82.0127	101.736	78.6776	60.7434	68.3274	63.0506	81.123	66.7574	70.9211	82.8749	106.492	97.3091	73.9279	54.6039	79.7126	96.154
SD=20	Sim24	89.1195	100.343	77.1926	81.5754	62.851	75.1135	50.5756	108.245	97.3664	91.4117	110.765	106.212	107.275	73.5207	66.301	82.5243
SD=20	Sim25	71.973	108.8	126.455	104.164	136.505	96.8199	59.9507	94.4158	71.6189	82.4271	95.709	62.8976	103.672	89.1534	76.0752	89.879
SD=20	Sim26	75.8807	53.3368	104.098	82.2595	70.6203	77.3028	91.2179	103.986	76.8463	105.223	96.5111	84.8655	94.3237	115.032	80.1228	78.1968
SD=20	Sim27	71.6169	78.0396	84.834	98.2623	88.3151	49.3214	80.7535	79.7388	99.7491	104.657	67.7025	61.4382	87.0692	97.4158	70.5441	111.591
SD=20	Sim28	59.1371	87.6616	92.0465	68.7892	71.5339	80.0114	83.5662	78.9717	82.0441	97.3589	89.3574	83.4387	64.0479	98.5086	86.7089	67.0885
SD=20	Sim29	94.166	72.0616	75.1975	60.1358	83.8856	74.1225	91.7586	69.6413	65.1656	86.2102	105.259	47.0485	69.4969	84.1191	76.5148	84.222
SD=20	Sim30	89.3528	83.1464	95.4768	66.6691	62.2966	89.3519	78.5847	78.052	90.3457	89.792	80.8791	76.5585	89.8906	78.875	72.5007	96.6671
SD=20	Sim31	84.4363	66.3789	73.2998	84.3805	64.0851	83.5956	112.664	81.4083	57.1505	98.0144	66.0813	102.032	101.198	84.5626	87.7998	61.7384
SD=20	Sim32	75.544	97.6244	87.1122	82.1073	82.6796	76.538	90.68	90.8672	71.3772	82.3505	59.1522	97.9264	58.3431	73.4204	61.2933	89.0333
SD=20	Sim33	75.4955	73.8045	72.5266	89.4599	88.6793	63.7799	84.3612	95.8764	89.3886	77.3176	92.332	77.296	91.5892	81.1719	114.742	77.5085
SD=20	Sim34	104.62	107.313	93.6801	73.6619	81.3869	107.992	83.3846	86.0354	83.8983	82.8065	107.649	79.546	78.9482	74.3017	88.7743	97.8192
SD=20	Sim35	105.958	58.7731	89.434	91.6438	82.9016	77.4226	111.374	71.5837	69.4675	82.7067	78.1642	75.5059	104.359	84.3704	100.353	80.7642
SD=20	Sim36	81.4502	80.626	100.495	129.431	93.8333	82.3357	104.803	78.1674	104.818	73.4653	93.1071	60.68	98.6769	99.4273	69.6761	83.9874
SD=20	Sim37	106.938	108.871	103.166	72.6463	91.6294	80.3289	95.9205	96.1008	95.6772	85.678	99.2049	54.2453	102.33	76.357	76.8979	73.1733
SD=20	Sim38	88.5266	64.2645	66.4345	83.5726	61.4215	82.0313	82.1782	85.6847	78.0896	62.6688	56.0375	90.1225	70.0882	75.9792	64.3383	66.847
SD=20	Sim39	89.3814	81.6862	79.6652	81.8986	78.666	95.7232	71.896	81.7083	72.2001	82.129	75.977	88.4381	74.0426	74.1626	78.0094	82.8081
SD=20	Sim40	63.9263	52.8156	87.5798	67.3113	103.641	70.5095	89.6671	69.3102	73.5797	74.7589	100.668	97.4891	91.3282	106.694	82.1714	70.4536
SD=20	Sim41	93.1289	65.081	85.0648	67.9862	75.2395	79.0356	89.2733	73.6447	78.3186	60.91	84.8877	69.0534	63.4467	87.5233	75.1908	70.0669
SD=20	Sim42	95.7133	82.2625	86.3094	95.5638	86.0273	78.2108	90.6994	88.0219	121.876	95.411	90.0767	78.6266	90.1236	89.3386	98.3327	78.2151
SD=20	Sim43	100.825	109.986	101.541	88.9176	92.2751	97.3394	58.196	97.764	97.8865	120.106	66.268	95.632	118.34	81.956	94.0982	77.6263
SD=20	Sim44	74.016	102.924	92.4943	81.0756	67.6288	98.5414	83.4263	101.706	103.3	93.7793	87.1969	81.5273	101.44	120.567	91.305	57.8901
SD=20	Sim45	91.1607	80.4362	59.6328	84.467	78.4034	80.3507	92.9772	89.8733	75.6253	71.8369	81.8389	93.4578	82.2618	59.5611	83.1174	71.8367
SD=20	Sim46	99.7618	69.2716	96.6495	96.8924	101.4	83.4249	98.2875	98.5922	86.8901	88.5343	104.624	74.8144	92.7117	91.2757	108.365	61.8347
SD=20	Sim47	74.446	70.892	78.7356	98.0411	80.9246	88.9052	80.0265	85.1698	90.6835	51.9268	88.7936	100.752	78.878	105.493	93.4097	65.3723
SD=20	Sim48	104.92	107.468	78.3075	99.187	73.7236	82.4286	83.8893	73.3708	65.7546	68.0628	76.9404	97.6388	84.7304	89.7596	71.958	75.5244
SD=20	Sim49	88.6836	93.0226	115.687	84.1227	66.7333	58.7441	79.8105	68.5051	78.485	74.5761	69.2912	61.8983	72.7606	81.3104	80.4714	97.0515
SD=20	Sim50	53.8159	86.5113	92.8663	98.12	74.3889	85.3803	92.2905	72.2011	91.1665	71.9867	92.8708	102.743	93.5892	95.4065	76.5463	96.711
SD=20	Sim51	89.7884	61.8003	57.2265	57.5677	80.2205	89.4578	81.2141	93.5026	79.2867	94.1213	77.1907	67.6518	67.7051	40.2753	83.1842	82.0097
SD=20	Sim52	85.2671	80.8259	101.978	93.6928	85.8385	81.7125	93.6255	117.607	100.543	107.4	78.0656	59.7886	95.4493	64.918	65.17	74.8352
SD=20	Sim53	123.77	97.7825	83.8231	57.0509	113.875	79.4603	73.6969	68.5159	98.2292	103.943	121.551	67.1838	92.1859	83.6238	93.5026	94.4588
SD=20	Sim54	84.917	84.1825	87.113	93.53	116.3	93.2986	62.1451	72.1288	61.5892	101.012	81.6784	95.9212	95.618	85.1119	76.7818	107.683
SD=20	Sim55	98.8959	113.946	76.1871	83.7118	84.7986	107.742	107.52	75.1755	81.6687	101.873	99.0551	109.48	81.6867	90.8348	91.5543	74.3676
SD=20	Sim56	94.9323	52.1477	79.4454	94.6102	77.9352	105.997	86.5767	113.317	101.276	78.144	69.4177	93.8574	72.4945	103.09	80.8911	82.5412
SD=20	Sim57	75.9548	102.857	93.9339	78.1473	84.5103	89.5496	84.5624	86.9147	92.2735	116.739	55.927	80.9719	74.3752	86.6258	69.32	87.995
SD=20	Sim58	71.993	76.6248	98.0416	80.6185	99.7672	75.1051	84.7262	77.3377	95.2251	103.964	65.0947	89.8111	83.595	72.4295	85.8196	86.0569
SD=20	Sim59	77.9121	56.9002	79.9219	88.5027	87.3521	80.1448	78.6726	66.6635	88.3019	87.6405	83.5401	65.2838	92.8364	88.5648	132.502	52.5782
SD=20	Sim60	69.3757	93.1616	89.0915	93.4519	109.407	73.9006	107.016	81.7609	100.365	108.775	95.3542	80.5243	64.4452	89.423	75.7631	72.1693
SD=20	Sim61	69.5201	94.7356	72.7215	61.1752	113.125	99.0609	83.8395	75.049	80.2933	85.0744	61.4407	90.9566	76.09	100.828	78.1239	97.3791
SD=20	Sim62	86.6088	110.122	84.4242	81.8506	81.9594	92.6164	115.358	124.038	83.1227	83.4322	78.5248	105.093	82.7299	71.3752	58.7266	104.954
SD=20	Sim63	75.999	64.4885	99.8519	73.0951	75.3083	100.354	94.7527	116.773	67.7432	77.5627	99.6973	78.3756	83.4744	91.8703	84.7491	83.3691
SD=20	Sim64	80.1251	85.3569	101.168	108.328	68.4258	97.0441	58.8578	77.5685	88.7515	101.13	60.2776	84.8765	119.765	89.3842	93.2588	89.397
SD=20	Sim65	110.528	84.2143	91.1942	88.1496	86.8433	99.5148	97.5562	61.4448	77.093	71.6511	62.6076	84.0999	109.889	90.0101	85.2434	76.8152
SD=20	Sim66	98.0482	95.6143	96.168	104.131	100.269	100.651	83.6131	81.7539	70.6543	96.2018	96.2231	81.2571	134.119	82.1816	91.4696	99.3808
SD=20	Sim67	78.2953	56.9179	76.076	96.4514	97.5134	110.18	89.9483	70.9629	71.0427	76.8335	97.5165	78.1487	82.9886	74.0606	91.1453	90.8854
SD=20	Sim68	84.6359	105.849	80.5383	110.345	74.8854	77.3712	76.3045	88.0092	84.3587	57.8539	95.2036	94.0566	105.64	101.318	90.589	82.5724
SD=20	Sim69	102.855	90.3422	97.2229	90.9253	104.443	87.1546	70.5555	87.3861	78.028	89.2673	94.3156	105.362	87.956	91.6642	96.9489	110.323
SD=20	Sim70	82.4142	111.556	89.0582	91.1851	81.4543	80.6734	54.3702	94.6117	61.9331	91.3959	98.0474	78.1258	81.5324	83.1031	81.9473	93.8115
SD=20	Sim71	98.5937	109.664	86.0811	102.209	75.4038	79.3686	95.1114	107.092	109.995	76.6209	102.222	75.6402	99.9022	70.2529	47.5581	83.5184
SD=20	Sim72	82.1206	75.3077	84.5594	93.3634	101.069	73.9302	72.4461	71.4326	94.9269	92.6529	95.4565	90.1627	114.677	59.3766	92.2947	82.6554
SD=20	Sim73	58.866	89.1286	53.8453	79.4399	77.7236	62.4115	76.9413	87.5895	70.6973	83.7574	63.2011	75.2738	64.6111	77.0599	79.9073	98.3611
SD=20	Sim74	89.6686	73.9735	58.2625	65.9083	83.906	75.5936	71.4499	84.6612	98.1125	97.5283	89.7474	88.0617	65.672	75.2444	66.9079	99.7792
SD=20	Sim75	69.4001	72.0567	95.9491	71.5036	76.4889	87.9447	57.5137	96.2026	69.0637	58.4881	99.0688	84.2771	104.475	76.9217	92.5902	72.4696
SD=20	Sim76	106.299	69.6708	95.0307	73.931	69.2508	98.9439	80.8575	85.2948	79.6506	94.4874	60.6229	62.6377	73.4753	61.6518	93.8778	75.4604
SD=20	Sim77	96.5236	105.981	84.1348	66.3083	98.3178	112.007	99.9485	98.749	90.3947	70.794	73.3905	69.9629	85.6959	99.4806	113.917	68.1389
SD=20	Sim78	83.2003	89.1126	82.3314	83.4157	108.273	90.7234	51.0944	96.348	69.4999	84.6051	84.8236	56.0225	101.574	77.1367	97.9073	75.4475
SD=20	Sim79	92.9833	71.3892	60.0148	97.417	71.9599	104.959	76.7296	84.8814	105.827	70.497	59.6296	95.8558	96.0086	68.1551	108.556	69.2942
SD=20	Sim80	41.0656	102.196	77.1768	97.1091	82.0652	93.9166	76.0171	96.599	66.1808	78.8152	70.9012	69.5407	96.4923	97.2853	69.2071	74.8019
SD=20	Sim81	79.6249	77.2436	66.0191	109.418	90.3818	76.0883	80.0179	81.3304	81.1554	90.8341	68.1881	80.6676	93.1858	86.6753	76.5328	91.6965
SD=20	Sim82	83.2263	115.177	107.699	107.511	84.3641	104.462	77.7135	51.3779	97.6379	97.6988	86.0716	77.202	95.9369	112.121	92.8768	74.3065
SD=20	Sim83	101.052	103.538	58.899	72.5262	107.383	96.8488	90.0844	90.4028	100.755	87.4018	99.8331	82.759	81.5605	88.7755	102.991	77.5264
SD=20	Sim84	77.0949	78.0776	76.6091	88.8875	82.404	82.4522	73.57	88.4944	101.804	64.8498	73.6119	73.5296	83.5277	92.563	106.323	93.4578
SD=20	Sim85	84.1112	87.6874	96.3889	87.3941	85.2381	74.0924	69.3274	58.0718	90.5643	103.523	81.3566	96.4358	84.4934	83.1283	87.3678	85.4001
SD=20	Sim86	84.233	81.0585	88.4894	106.417	100.518	66.9146	89.6762	96.0089	83.2348	86.1169	80.8835	109.518	78.8571	67.2274	92.5192	84.0928
SD=20	Sim87	95.669	74.1988	73.653	72.9542	107.676	103.277	80.2631	77.6663	82.3502	80.8188	70.3782	84.0159	82.6209	83.629	85.2338	80.4308
SD=20	Sim88	78.863	66.0788	89.731	75.5677	86.2269	70.055	99.705	74.5297	84.0309	84.8495	57.6247	78.3384	95.4024	77.6782	72.7224	84.0309
SD=20	Sim89	68.772	84.8196	100.012	59.8671	81.0903	96.1021	73.9433	89.7191	101.526	75.4107	102.987	61.9741	62.5148	78.6205	89.527	85.1524
SD=20	Sim90	89.2697	84.0627	92.0471	79.0068	103.567	101.364	71.5974	88.7171	102.988	83.4289	111.741	73.1174	97.4216	64.1951	86.7768	78.4262
SD=20	Sim91	88.8925	47.2621	84.5761	93.3385	104.27	73.6238	60.8466	83.6474	70.0836	86.779	98.9294	70.3671	82.9774	62.0724	76.1295	106.123
SD=20	Sim92	108.136	94.4284	112.996	83.4238	90.2469	84.4161	79.9321	75.2676	86.038	90.8264	95.0183	98.8195	95.7137	98.2136	80.9487	81.5969
SD=20	Sim93	83.8104	74.4358	94.8838	75.4383	83.6878	68.3674	82.0317	86.6377	67.9222	57.6967	95.3265	88.0629	102.408	118.56	102.566	77.7888
SD=20	Sim94	74.2466	65.4203	70.3049	98.0795	88.2879	85.853	102.96	77.3914	79.7597	72.8742	94.6872	83.8608	79.1084	76.052	82.9795	77.0809
SD=20	Sim95	76.1383	113.493	72.3392	106.756	94.9151	87.9276	96.4458	86.8403	73.6717	84.7755	98.6241	96.5936	97.3728	102.18	98.623	80.6813
SD=20	Sim96	66.6401	96.3613	107.555	69.582	108.687	78.6555	75.8326	81.074	109.272	53.8463	97.5803	76.2396	88.2234	93.8831	85.7803	67.991
SD=20	Sim97	96.6066	77.4359	55.4039	97.4454	76.3552	102.586	86.0682	58.7038	80.5925	94.5725	80.2468	91.5018	44.7243	91.8131	88.3654	99.4103
SD=20	Sim98	77.2841	60.1242	90.8086	83.9643	87.4976	71.4681	44.5441	91.2201	48.8555	87.681	82.4215	103.315	96.5571	70.1512	58.5136	71.8977
SD=20	Sim99	58.6922	68.4898	78.1906	77.1621	74.742	85.6256	81.6358	87.9527	84.3328	76.6635	78.0534	68.1493	78.9629	76.5691	56.8228	90.2437

## Sheet: DBP_K24
Result	ID	DBP01	DBP02	DBP03	DBP04	DBP05	DBP06	DBP07	DBP08	DBP09	DBP10	DBP11	DBP12	DBP13	DBP14	DBP15	DBP16
SD=5	Sim00	85.0225	83.4128	86.1507	86.792	84.1294	76.6917	80.7482	77.9076	79.3211	82.7508	80.0545	77.1758	84.0151	84.6267	79.1576	86.445
SD=5	Sim01	89.146	84.8113	88.6219	83.8142	93.0127	87.2722	87.7377	86.4967	96.1656	94.1883	82.9322	84.8283	92.4424	93.0796	95.3473	90.7301
SD=5	Sim02	86.4562	86.7047	85.5163	84.0937	86.6393	87.5476	79.8228	91.6672	84.1229	85.7229	93.8257	89.4064	85.7081	82.7171	80.5693	90.9066
SD=5	Sim03	87.5864	83.5753	86.7348	83.2735	88.0085	85.5029	83.4237	96.1472	88.7956	79.427	91.8206	89.916	90.8975	90.0039	85.477	87.5615
SD=5	Sim04	85.8454	82.8348	89.5064	85.9746	88.7582	87.7511	87.3632	88.9892	87.5208	84.7821	90.994	90.7721	87.8325	88.763	92.1353	94.0777
SD=5	Sim05	84.9378	82.7922	82.5033	90.4278	80.1157	88.8521	84.9715	85.973	81.2905	83.7242	80.6452	85.1429	85.8597	86.1144	81.0756	84.7561
SD=5	Sim06	81.4271	81.2848	76.3624	85.8232	78.5563	84.1027	81.7168	84.6281	77.1659	83.6997	78.1008	85.8712	77.689	83.8783	79.6623	75.1982
SD=5	Sim07	87.8836	77.7461	85.5924	86.9636	86.1072	80.5134	84.3968	84.0844	86.7277	81.9057	88.2528	73.4987	88.1986	82.8066	82.8208	80.8002
SD=5	Sim08	91.1929	84.1371	89.9171	85.7635	87.6134	87.3245	88.0182	89.3522	84.633	88.3077	91.4164	84.2767	84.8664	89.7066	86.8889	91.9868
SD=5	Sim09	91.8364	98.8255	93.4837	84.7174	89.9245	86.9746	86.2619	86.8956	90.1348	84.7645	87.8873	92.2133	91.8987	98.4081	92.2956	87.444
SD=5	Sim10	83.2437	79.7388	86.8011	85.9935	88.4912	89.0051	86.3763	85.3317	91.8245	90.6789	89.5352	89.365	89.4931	86.7864	80.8923	86.4139
SD=5	Sim11	83.0088	83.5018	86.9995	83.6927	84.5863	76.7542	84.8229	87.3868	82.924	82.4046	84.0083	84.7708	88.2294	88.9674	89.1467	84.4418
SD=5	Sim12	81.6317	80.8725	80.7195	84.1955	82.9461	82.6842	85.0276	80.4076	86.5287	77.2755	89.5366	81.914	84.3346	89.583	88.8502	87.249
SD=5	Sim13	84.5775	91.4178	87.387	88.5864	90.9936	83.4244	83.2077	85.4237	86.9361	85.893	91.244	88.6092	82.4107	91.8307	86.7532	91.3238
SD=5	Sim14	83.6807	80.5664	86.1699	83.3137	82.7268	86.0307	81.4162	85.3474	85.2593	82.7242	84.7571	83.6977	85.0955	84.5205	80.8532	78.6138
SD=5	Sim15	80.1159	80.7959	80.9379	78.2953	83.5292	85.0349	90.0427	83.7068	84.3576	80.3043	82.2403	84.3052	77.6209	78.6297	79.0023	81.716
SD=5	Sim16	88.6726	88.8079	85.9207	80.1655	93.2708	85.333	84.1673	90.7606	84.2221	82.3462	93.7831	85.9751	86.582	89.8495	86.3689	86.7017
SD=5	Sim17	72.0716	77.6286	81.5592	84.6326	88.2469	82.0091	88.8133	80.7798	81.4692	81.5793	81.0647	83.1693	81.08	75.5473	79.6597	81.5634
SD=5	Sim18	94.3118	96.4976	80.9264	86.2343	84.4666	86.4799	84.5021	85.3792	91.1527	88.2762	87.2793	91.8119	88.4971	83.1389	86.229	90.4114
SD=5	Sim19	78.4355	87.752	85.8554	80.3009	76.354	82.8182	81.3726	83.2394	82.3005	77.2643	77.6363	78.8204	86.1731	80.8799	80.4816	80.1801
SD=5	Sim20	84.433	78.7123	80.5461	82.6158	82.6029	80.4562	84.1965	77.5057	84.742	81.4263	83.2218	88.2603	80.1763	85.9931	80.5517	82.2189
SD=5	Sim21	81.0398	81.3648	81.294	85.424	87.9938	85.0761	91.1462	84.2918	94.8415	90.4967	78.5693	84.3339	87.7916	86.2437	93.2022	85.5287
SD=5	Sim22	83.5715	89.5227	81.1351	83.7549	76.8736	89.3926	79.1325	87.5793	80.436	86.9533	83.3948	81.1245	86.7733	77.2758	84.8053	78.8689
SD=5	Sim23	74.3979	79.2767	79.7129	81.8561	81.9161	84.7844	74.7789	83.036	83.5964	80.3699	81.7967	79.867	82.2507	75.9114	80.1442	74.7748
SD=5	Sim24	90.1018	84.1523	87.9856	86.0448	88.7279	89.8511	87.0146	89.4767	87.234	87.2206	89.8645	89.5462	85.4022	93.0249	92.999	89.9841
SD=5	Sim25	89.0382	92.2675	91.7709	91.0449	94.827	92.0269	88.1523	85.573	89.1233	84.191	88.2195	86.4974	89.5555	87.4936	86.9006	94.5495
SD=5	Sim26	86.7375	85.2773	87.4836	89.0083	88.9148	88.2071	89.5422	89.3054	86.6992	89.174	90.7883	89.3509	93.4579	82.1581	90.4378	86.9126
SD=5	Sim27	84.4159	84.8052	84.6548	82.5807	82.8076	81.7619	85.3793	83.1498	81.2568	78.8935	80.9583	80.8007	83.1368	82.0562	79.391	81.8157
SD=5	Sim28	85.868	80.7408	83.151	84.571	83.7029	81.324	85.2221	75.6231	74.1019	82.9316	88.8181	80.5208	74.7353	85.5762	80.5467	79.6864
SD=5	Sim29	81.4359	82.9996	87.5231	87.4752	80.0459	80.4251	87.3291	83.4258	89.71	83.5027	81.6955	87.2313	80.9942	81.1129	78.8979	83.0307
SD=5	Sim30	86.645	89.5514	88.3505	91.375	86.566	85.8968	78.7217	86.8335	83.2784	97.9468	87.4176	88.2217	82.8083	86.7943	87.8887	79.4975
SD=5	Sim31	79.9331	82.1532	79.5817	78.8482	82.9243	84.3924	72.7271	79.7321	86.6692	77.8839	84.533	73.3739	85.5051	83.2103	79.0649	78.6308
SD=5	Sim32	86.9604	85.5968	83.3006	81.3326	80.7861	80.9805	83.793	81.8486	77.0556	81.2682	73.6109	83.6115	88.2277	77.3784	82.6704	81.536
SD=5	Sim33	87.4731	89.563	84.2956	81.5031	86.7686	82.0399	89.426	91.0692	83.7213	86.1301	82.4926	78.1805	90.3034	83.2579	90.6202	91.9091
SD=5	Sim34	87.1351	94.3938	91.0064	89.8107	90.0716	83.0132	91.4989	88.0802	85.4396	94.2894	82.5705	87.3157	82.6558	86.872	89.4193	83.7347
SD=5	Sim35	83.2805	77.9111	80.1993	74.505	81.1708	86.284	74.4792	82.6939	75.2679	77.4195	79.9285	87.2736	82.9836	81.2576	74.796	79.9931
SD=5	Sim36	82.7643	88.9686	81.0776	85.6712	90.6325	86.5379	83.4919	79.1089	84.2395	80.7378	90.9815	84.4982	80.7832	80.781	85.1921	82.8857
SD=5	Sim37	86.6782	86.1012	81.8709	85.6698	82.246	77.5346	84.8315	86.3166	83.8215	82.5371	92.9563	87.8121	87.9591	83.9649	86.9713	86.7733
SD=5	Sim38	79.348	77.328	79.32	77.0532	76.4183	78.0526	84.5116	79.7685	78.8394	77.1225	82.9546	84.6888	80.7363	82.1475	83.5198	80.8866
SD=5	Sim39	91.8796	82.7625	84.1029	79.2882	95.4155	93.5994	81.3329	88.9925	88.2924	88.8649	88.5492	83.6895	83.8679	87.419	90.5523	93.6726
SD=5	Sim40	79.9887	86.7262	80.5978	82.1891	80.9785	82.3181	85.5589	81.642	81.616	81.4752	86.4357	89.0142	94.0876	85.8541	85.6431	86.9292
SD=5	Sim41	75.4903	86.6184	84.1565	77.3942	85.5557	79.3022	80.9759	78.1844	84.1079	86.2513	79.4939	78.5443	83.3245	80.1906	84.1763	84.7515
SD=5	Sim42	90.7937	89.1819	83.4365	94.8231	86.2315	86.9734	89.7011	88.868	90.8085	93.61	89.9794	86.358	94.5765	95.0619	87.6373	91.695
SD=5	Sim43	86.6018	90.3397	87.7605	91.6911	86.9042	87.7345	89.0828	89.0495	89.0571	83.0942	85.3227	87.6856	79.5875	92.5055	87.4416	82.5716
SD=5	Sim44	95.1904	87.3535	95.6637	91.3897	89.6606	86.2407	89.7872	89.4618	92.3228	90.6854	92.9056	89.3135	86.8815	82.5879	97.6179	82.5349
SD=5	Sim45	75.5547	82.7746	80.5117	82.1059	79.5221	75.4155	74.0739	84.9736	80.6759	78.5593	80.1679	72.2052	83.7568	81.9758	83.5834	78.4448
SD=5	Sim46	83.0833	86.8045	83.0466	91.0139	89.121	86.1562	86.2795	88.723	85.0967	90.6916	87.3563	89.9782	84.1021	89.922	88.65	88.1893
SD=5	Sim47	85.5501	84.3338	81.6049	83.911	75.0089	78.5792	83.2545	83.2004	80.7657	84.0938	78.4198	82.9408	80.73	80.6921	83.113	84.0616
SD=5	Sim48	91.0227	90.0014	90.5942	92.8843	92.7734	93.9589	92.4418	87.6086	86.0092	89.732	90.8887	92.1678	92.4399	88.7583	89.6274	88.9361
SD=5	Sim49	80.1273	84.3975	78.0353	82.4481	74.1161	81.2024	82.1194	80.8683	87.101	79.4505	72.0294	75.3895	81.3432	79.039	83.5398	76.3888
SD=5	Sim50	78.3527	82.3417	92.7513	86.4629	84.9244	92.2283	83.8784	90.5942	92.8262	86.2327	87.1702	83.7028	85.7453	82.7047	86.8424	81.3831
SD=5	Sim51	79.5537	71.709	78.377	75.7681	82.3899	76.3846	83.2836	81.3029	83.2367	84.1877	84.4949	79.2218	77.4751	71.386	85.5505	83.5868
SD=5	Sim52	80.935	88.6724	85.1156	86.8175	89.8245	86.3026	87.0395	84.7145	87.9621	96.3347	85.3506	88.7044	91.6985	84.7624	90.9419	85.1405
SD=5	Sim53	87.0439	85.5898	87.3751	85.7313	83.2314	90.2052	89.172	91.1511	88.9335	83.7668	91.5877	88.9333	92.6661	86.8196	93.5405	95.8348
SD=5	Sim54	80.1913	93.5647	87.6904	83.5902	80.5873	84.1404	83.3256	87.3719	81.0946	90.7577	85.3629	82.9053	89.7541	84.896	82.6224	84.5936
SD=5	Sim55	90.2297	93.0546	94.1309	92.5303	89.7827	95.0097	92.8632	93.3285	80.3121	89.3051	88.5329	86.4439	88.6558	89.4662	88.0294	87.8164
SD=5	Sim56	89.6896	88.7453	89.356	90.5923	95.6977	86.7662	87.0073	91.3743	95.555	89.8545	88.733	82.6688	91.8173	83.2675	89.474	86.0326
SD=5	Sim57	85.9997	90.9327	85.9285	87.5232	86.4246	85.3291	79.4868	87.6573	93.3065	86.693	92.7012	91.9212	87.7392	89.0803	86.7368	89.9278
SD=5	Sim58	80.7808	84.6672	74.79	73.8989	82.5238	75.3377	82.6597	82.4707	78.8188	81.1347	75.9345	81.4479	76.9201	74.1239	77.4636	82.5828
SD=5	Sim59	81.6299	85.8528	77.7701	83.9055	78.2597	83.0696	85.8229	90.5087	75.8873	84.594	88.7005	86.137	79.1936	82.4009	82.0963	83.6885
SD=5	Sim60	89.164	88.4485	84.0491	87.1478	92.8144	79.8818	92.2454	91.5902	86.4824	92.7695	86.6567	91.0082	89.4926	85.3134	83.7427	89.7016
SD=5	Sim61	81.9996	87.3797	88.3	87.2685	88.5732	81.523	88.1018	84.3822	91.2817	83.788	85.4955	94.1625	93.076	86.6151	88.2782	85.7719
SD=5	Sim62	88.3552	91.3831	86.0945	90.2712	91.9033	81.2238	87.9781	86.2065	89.9271	87.8237	91.1294	90.1771	91.6374	87.0606	83.5765	86.7358
SD=5	Sim63	91.2647	89.8883	86.1635	94.5303	90.6398	87.2619	95.9155	92.7946	91.302	88.7408	88.2962	88.823	88.8777	93.1049	87.0764	90.8151
SD=5	Sim64	80.1029	86.6266	87.3684	85.1154	85.8231	82.8168	83.8474	85.0463	88.1782	82.9554	86.7673	87.0152	87.2991	86.475	88.8947	87.7262
SD=5	Sim65	86.3173	85.1146	87.01	91.578	92.3709	93.6747	85.7477	85.9586	92.4819	86.2986	90.1517	83.8033	89.4502	92.7414	88.513	93.5541
SD=5	Sim66	80.0561	88.9453	92.2699	86.4621	82.5442	85.0891	89.3348	83.3151	88.2962	87.0436	93.5361	86.4812	87.3889	86.4625	84.1317	86.6828
SD=5	Sim67	80.5574	82.9058	82.5891	82.901	81.9638	81.189	79.5211	78.3883	76.9465	81.8223	77.3002	76.4047	82.8184	83.2211	79.0608	81.2452
SD=5	Sim68	88.44	87.1819	85.7989	87.9093	82.827	90.3428	87.6495	92.0856	79.1695	90.1964	89.4076	89.4721	85.3432	86.048	87.8443	86.7021
SD=5	Sim69	87.1891	87.1755	86.2009	89.6443	87.808	79.6252	90.214	83.7592	86.851	87.4239	82.5212	85.917	98.3909	85.7599	82.755	92.5492
SD=5	Sim70	80.0314	80.6262	84.0227	81.2582	80.6065	81.6161	84.7493	82.027	86.1742	81.9805	85.2168	83.6908	81.6566	78.3396	72.9482	78.7329
SD=5	Sim71	86.1246	83.6131	78.6344	86.5314	92.6082	85.8738	88.2683	89.0356	85.0029	85.2274	85.813	89.8643	85.3744	90.4647	85.4617	90.0731
SD=5	Sim72	95.866	91.0172	88.8152	89.6152	85.1072	90.6757	89.5954	87.4188	83.8738	92.1213	80.5111	84.2793	88.5577	82.2393	82.5481	88.2188
SD=5	Sim73	73.1809	77.7357	81.179	75.2535	76.3497	82.8831	80.357	92.4085	80.7735	85.974	84.3451	78.7114	81.2226	86.9516	83.9554	79.1181
SD=5	Sim74	82.3967	91.4154	84.0989	87.8685	89.8058	82.6533	88.2575	83.884	85.9145	79.7676	85.8406	88.393	81.4377	85.7643	84.5902	86.5623
SD=5	Sim75	74.6096	78.4004	83.0317	78.5311	84.1065	80.1501	85.1833	80.1041	79.8639	82.9657	81.7136	84.1742	78.6937	79.3568	77.5146	72.3907
SD=5	Sim76	84.0801	82.7607	81.6166	85.3072	81.757	79.8458	86.3976	80.8432	81.3789	81.1341	79.8352	76.3216	82.4991	81.8332	74.7785	75.3546
SD=5	Sim77	89.2598	87.0925	91.758	79.3393	87.1469	91.6507	91.5715	88.4091	84.9775	89.2183	92.9267	89.7823	88.5808	82.5677	86.7814	89.2363
SD=5	Sim78	88.0718	83.3901	84.7447	86.245	86.5797	79.5963	87.9612	82.4083	86.4724	82.723	86.7707	90.2648	84.983	88.0019	82.8253	87.633
SD=5	Sim79	73.4811	80.8114	81.3009	81.8592	79.1874	84.8746	85.1977	79.7173	86.6418	80.4225	77.0674	81.8649	80.97	81.9106	79.8438	75.3311
SD=5	Sim80	80.7806	80.8694	85.8283	84.1785	83.5267	77.0163	83.61	84.0147	75.8888	88.7142	82.8459	80.1204	81.6581	83.6884	79.5982	80.6129
SD=5	Sim81	89.2889	80.1749	83.4782	89.9507	82.6963	80.429	86.2777	91.3923	85.7211	88.9629	87.3451	88.237	84.8703	78.0236	91.0501	86.0737
SD=5	Sim82	89.5633	85.6364	87.2095	88.0969	80.5026	85.1484	85.5005	85.7135	88.3727	88.8392	91.6682	87.3296	85.3034	86.2492	85.2752	86.4893
SD=5	Sim83	91.1287	88.301	87.2973	86.8182	77.6001	84.0723	86.6707	80.0798	90.3235	84.9319	84.8122	92.8089	80.6935	89.0876	89.7525	89.8549
SD=5	Sim84	79.9401	88.3309	86.7093	77.7792	76.7516	83.7136	80.1524	81.8905	83.3823	88.0443	87.3312	85.1111	84.0871	86.3661	78.78	81.6602
SD=5	Sim85	81.9035	78.3615	85.9004	81.4877	79.2329	80.5655	82.4006	79.9244	83.1265	87.6706	88.1107	83.1941	74.123	84.0419	78.7393	84.144
SD=5	Sim86	84.3329	74.8284	84.3042	86.2173	85.5532	85.9956	79.0255	84.1328	85.6344	82.817	85.2956	80.8363	84.9674	89.6518	78.7472	74.6455
SD=5	Sim87	79.6699	85.317	88.3084	83.0736	77.9422	82.0784	82.5208	82.6726	81.5473	82.0358	80.1247	83.3119	77.3603	82.6367	78.0621	83.048
SD=5	Sim88	83.5795	81.4417	87.4289	87.5317	80.25	82.7077	82.2116	85.7642	76.4329	87.2737	84.0344	80.1442	75.6018	85.8676	83.3879	81.56
SD=5	Sim89	81.2284	83.3761	91.4634	84.1061	89.2314	85.6171	89.4516	84.6145	86.5943	81.3931	86.2173	83.4637	88.594	82.5899	87.5373	85.9882
SD=5	Sim90	92.2399	86.4025	81.2222	89.3917	89.7173	90.5055	87.4054	82.5789	88.1813	87.0244	94.8199	84.0578	85.6124	83.6016	86.0022	90.8895
SD=5	Sim91	82.7557	82.5769	81.4244	78.728	80.2646	77.5443	83.2359	83.3476	77.6944	77.3232	85.039	80.6946	91.3874	83.0939	80.2626	81.1034
SD=5	Sim92	91.0665	88.1107	87.4583	89.8628	96.9495	92.3123	94.7587	90.5449	97.1065	84.4185	91.6147	88.0778	90.1871	87.239	89.7371	89.094
SD=5	Sim93	87.2933	82.7335	87.1252	88.8764	91.3847	90.2727	94.2499	84.2077	90.4538	89.7765	86.3934	89.0298	86.2406	83.173	84.5349	91.8981
SD=5	Sim94	78.8511	85.2366	86.2292	84.762	81.3415	79.335	84.6099	80.1575	87.3005	79.7383	78.1811	80.3133	76.3767	86.4548	82.1742	77.859
SD=5	Sim95	88.1334	83.1555	87.6656	86.3573	81.9173	83.6473	84.0136	84.1542	85.9641	84.6001	83.2522	86.001	89.54	92.0582	85.1564	84.0475
SD=5	Sim96	93.4306	89.6166	84.6648	84.5081	91.288	88.1111	88.3786	94.6952	86.4811	90.6429	89.7412	92.7897	90.4069	85.9201	89.0194	87.9299
SD=5	Sim97	81.6245	85.5153	88.105	82.4626	79.1594	78.2462	87.7675	81.4975	76.3304	81.321	82.5413	88.1443	83.7876	91.9592	83.2257	87.7293
SD=5	Sim98	81.2043	78.2253	79.2266	86.5715	84.5091	87.2437	78.0024	83.3825	84.527	72.0554	81.2533	83.2927	80.4889	86.3669	84.44	81.3505
SD=5	Sim99	81.1959	90.4722	76.6083	86.2552	81.2153	86.5935	89.3483	89.6468	82.4707	84.5193	87.9444	79.4645	80.406	82.6285	89.5923	84.6765
Result	ID	DBP01	DBP02	DBP03	DBP04	DBP05	DBP06	DBP07	DBP08	DBP09	DBP10	DBP11	DBP12	DBP13	DBP14	DBP15	DBP16
SD=10	Sim00	77.7502	72.8075	81.4006	96.4383	86.66	74.5985	79.5753	79.5632	60.7986	83.1114	82.8294	80.9328	78.1035	72.772	73.3404	83.3342
SD=10	Sim01	80.3416	98.7648	91.4883	103.455	90.8341	91.978	83.9616	82.0168	92.7434	84.8534	98.5174	78.9298	92.6631	94.2854	82.9171	84.7168
SD=10	Sim02	85.1127	87.4109	78.1614	87.6809	83.7956	86.8906	87.7404	61.7225	86.9529	87.7681	87.3734	83.6143	89.5222	78.2725	81.9669	83.7942
SD=10	Sim03	89.1812	87.5258	98.5866	86.7901	94.1636	91.9929	84.2635	81.2856	100.625	81.778	89.6763	80.9649	75.0271	85.634	94.2946	92.9917
SD=10	Sim04	93.2643	87.9659	97.8599	99.9583	88.73	79.9177	84.8523	86.0722	86.5126	88.5074	85.5017	81.131	79.9403	77.6862	97.5822	100.058
SD=10	Sim05	93.3555	95.4112	91.3726	95.1094	80.0268	89.0662	84.8466	88.7599	86.9151	99.8302	78.3909	82.7182	86.4242	69.1926	88.4449	102.713
SD=10	Sim06	75.0916	77.4583	81.1385	60.8472	75.6514	74.9028	87.4862	84.8263	70.1237	83.5533	79.9255	74.8275	93.6154	84.8695	81.8184	86.8543
SD=10	Sim07	79.4954	93.3426	78.3525	90.7568	103.058	74.432	83.9208	91.7288	86.4575	84.1026	85.1635	87.1205	79.5654	91.8851	86.7784	78.7737
SD=10	Sim08	74.6644	83.0266	93.9323	79.09	88.3631	87.2667	85.036	83.1678	85.665	96.7834	85.4475	83.7991	85.0747	90.0242	82.5663	93.1516
SD=10	Sim09	82.097	88.2889	101.132	86.6435	97.8684	90.9001	86.6293	92.8776	94.1889	89.1214	100.118	86.4529	83.2866	90.1032	92.0418	90.6715
SD=10	Sim10	93.0387	82.116	85.032	91.2808	99.307	93.8336	81.5122	95.4855	108.52	86.2545	86.3383	78.4334	100.784	84.9735	85.3675	96.5637
SD=10	Sim11	89.4056	73.2528	90.506	93.0333	90.2167	90.2827	80.4688	76.2478	72.1787	78.5054	90.6004	80.1214	87.6785	97.4227	94.8793	85.7742
SD=10	Sim12	77.4274	94.3652	77.373	95.5545	89.6758	78.6474	87.2155	90.3485	84.7951	76.0408	82.9083	87.7988	88.4094	82.4868	76.563	75.0824
SD=10	Sim13	79.7622	79.1564	83.3201	65.7639	79.3864	85.4176	91.296	90.6523	85.7891	101.129	90.0666	93.6474	79.4046	83.7037	90.7891	87.554
SD=10	Sim14	84.0663	84.3606	74.6818	71.207	83.1855	93.5814	81.2511	76.8632	78.2809	90.3639	82.4596	78.9912	84.9974	70.9116	89.8576	61.2941
SD=10	Sim15	90.6647	84.3214	78.5694	86.5924	86.3817	78.7984	88.3279	70.4744	76.686	65.9497	69.2497	80.313	84.3679	76.4615	83.6323	67.7303
SD=10	Sim16	93.2529	84.3286	83.3198	78.8487	95.034	86.8251	89.7397	78.0354	90.8656	71.31	96.967	83.1559	86.2803	78.9785	87.9475	86.0389
SD=10	Sim17	89.6032	84.0981	77.743	85.8644	82.614	72.5131	79.7368	78.7486	82.1229	82.0292	71.7281	81.3735	85.5417	82.3954	93.2472	84.2646
SD=10	Sim18	86.1827	81.798	89.8422	85.9584	92.9078	89.9035	94.8054	92.1425	85.4498	89.0883	84.9339	105.109	90.6003	84.1246	88.8145	90.9134
SD=10	Sim19	85.7404	82.2085	80.6919	78.3585	87.8967	68.9642	79.3556	69.8291	76.4724	84.3581	72.5043	91.4775	82.0165	77.3488	76.5729	91.292
SD=10	Sim20	76.7208	93.459	76.5515	86.6153	70.7634	85.049	79.9543	81.6756	71.9994	85.8658	85.718	83.5162	70.2189	78.7473	82.4684	82.6988
SD=10	Sim21	95.3359	81.5359	82.788	89.3526	78.2365	98.5859	74.1349	77.5846	83.1568	84.9698	89.7428	87.3543	81.4788	86.207	80.9544	97.0503
SD=10	Sim22	80.8958	76.3482	91.4808	82.4548	90.2133	74.1213	93.7417	82.1918	92.3477	94.6037	77.9308	84.3052	79.2069	81.0613	85.382	83.4895
SD=10	Sim23	74.0022	72.093	83.7432	69.1278	91.088	66.9264	75.3811	85.394	76.3062	71.2854	88.3667	81.6697	85.3831	82.1284	81.944	68.0217
SD=10	Sim24	87.9467	92.8996	89.3303	88.8486	94.1677	90.0008	85.8411	91.0877	88.7791	88.2839	97.9283	86.69	89.091	82.8438	99.9553	70.3603
SD=10	Sim25	90.0601	93.6996	84.9658	96.6605	99.3327	82.1698	84.5414	81.5456	93.3777	88.913	92.1668	91.5362	96.8543	99.2962	88.4991	84.6868
SD=10	Sim26	86.033	86.9624	97.2216	78.5021	88.5381	81.9834	90.0149	85.1088	94.726	102.745	81.86	68.4591	93.2809	86.1005	81.9316	82.7077
SD=10	Sim27	77.9344	74.6949	77.9495	91.7695	94.3809	74.2688	74.8072	83.4624	81.9753	80.878	88.9812	82.4602	84.7093	82.3587	75.5298	75.1303
SD=10	Sim28	91.9338	81.6554	91.2054	90.5034	89.2878	94.7144	81.4341	67.6805	82.3208	82.0131	89.3047	83.4712	78.3091	85.5894	85.5001	81.5234
SD=10	Sim29	89.1063	82.9825	78.275	79.7361	84.7003	82.1163	81.9236	77.0917	93.0572	97.6456	78.9097	82.9647	85.9569	80.7845	92.5046	88.006
SD=10	Sim30	75.1909	86.8537	93.98	87.4774	84.1368	97.8497	85.9001	75.0068	83.789	85.0665	99.3114	83.8981	92.4362	84.5235	78.1017	75.8671
SD=10	Sim31	93.7086	78.2055	80.5445	76.8005	73.2676	80.6983	75.3139	74.4895	81.846	70.7135	82.9489	70.0625	88.9963	96.4772	72.5974	81.995
SD=10	Sim32	96.56	80.1593	75.667	71.9871	70.0074	76.7559	86.2058	69.6234	79.0136	75.8788	77.3185	78.9827	86.9028	79.0624	75.5122	76.204
SD=10	Sim33	86.0166	88.629	87.2044	79.4121	86.2571	90.0643	94.9279	97.9776	85.6306	77.6937	101.459	77.0097	81.7832	85.4986	99.2725	93.2728
SD=10	Sim34	91.6497	82.9255	91.6085	84.9596	105.895	89.9946	93.1853	98.0624	81.5982	75.9791	91.5923	82.5386	78.5913	90.5293	93.2352	104.664
SD=10	Sim35	85.0025	83.1469	78.5195	87.2367	61.6667	71.5835	84.0579	86.8378	74.4907	81.241	81.3011	86.1302	76.5657	76.8933	76.7088	86.8563
SD=10	Sim36	85.8809	95.1712	84.5487	87.0765	89.7809	79.7923	81.5036	79.0561	86.1895	79.1557	86.2739	70.8354	82.0192	87.6619	81.5726	84.1864
SD=10	Sim37	88.2515	73.4753	92.3207	83.0434	78.9781	78.8632	91.4847	86.1979	97.3571	84.3062	89.1939	82.6038	85.8125	85.776	90.5273	82.7532
SD=10	Sim38	84.9569	76.0832	87.5846	74.8943	75.9464	89.4464	85.1321	78.7298	84.8024	89.598	72.6546	67.5961	80.1989	88.4094	87.8896	82.5536
SD=10	Sim39	95.1279	78.4646	93.3073	87.1478	95.1328	77.2371	92.418	79.584	78.4735	80.2683	93.202	100.42	96.7415	99.7134	97.6633	74.3177
SD=10	Sim40	97.8627	94.2525	84.17	97.4621	97.4239	75.7929	83.8674	88.5662	99.2786	89.598	83.7892	92.6791	86.4274	74.7247	84.4528	83.0391
SD=10	Sim41	93.1672	81.5487	78.2647	78.9101	80.4361	62.5648	83.6355	89.3833	77.3969	82.1413	81.5865	94.2713	78.2936	79.3099	83.819	82.8205
SD=10	Sim42	89.7427	82.823	93.5448	88.5674	87.2812	83.323	81.812	97.164	83.9501	92.5259	94.9336	91.5767	83.8683	89.499	91.7099	78.7422
SD=10	Sim43	90.2477	96.8218	98.6824	85.9606	82.7869	86.1095	82.3053	76.2416	89.5266	84.2449	87.2922	92.0396	93.805	86.6297	93.6025	85.3372
SD=10	Sim44	94.0798	77.7847	99.2047	93.0856	92.2977	92.5842	90.4598	98.7843	77.7359	86.892	93.2388	95.3624	76.5821	90.8756	87.0286	98.6168
SD=10	Sim45	71.5418	81.7652	82.6134	85.5275	89.6743	78.3808	77.8406	79.8991	81.1037	83.0309	80.7646	87.9866	67.3537	74.1476	86.1988	76.7417
SD=10	Sim46	89.9813	75.9017	83.9643	86.3094	87.7765	91.8818	97.758	95.8982	82.556	85.4898	90.2706	78.0229	85.5883	83.3349	91.2581	95.5129
SD=10	Sim47	77.5646	79.0182	85.7232	88.2628	74.9918	76.749	85.2385	81.8813	66.9145	86.2721	85.8493	82.1288	85.6951	84.4072	66.7629	73.8567
SD=10	Sim48	86.1989	94.5235	99.7802	73.2333	86.624	103.44	98.3595	77.1957	90.1475	88.6326	96.1132	83.6191	98.2644	88.5367	92.804	99.8678
SD=10	Sim49	84.494	93.6806	95.7549	80.132	84.4236	88.0264	89.913	87.4707	79.518	84.7183	86.0801	86.9692	80.1282	78.5601	78.7014	84.5368
SD=10	Sim50	93.9275	96.5485	88.2818	95.5178	89.5623	88.6579	77.2899	83.7845	87.4481	87.4689	93.546	82.9231	81.4845	92.9485	91.8294	88.4169
SD=10	Sim51	97.2125	77.9118	72.5571	69.7558	84.4342	83.8466	85.5072	73.8819	72.735	81.5181	77.4864	88.5143	94.249	81.2731	75.9058	76.0436
SD=10	Sim52	83.0589	78.8971	93.7124	78.4492	87.9668	99.8788	90.0865	106.263	90.8053	96.9205	79.319	87.9643	86.5552	83.8363	81.5278	83.9965
SD=10	Sim53	87.3897	95.502	96.5967	83.5651	84.3167	104.229	93.3681	91.5912	79.83	80.7687	93.1228	85.7088	86.4192	89.565	94.309	85.1329
SD=10	Sim54	88.4329	73.7089	85.3453	83.8838	83.7767	81.4925	84.9539	81.0706	83.4172	84.6465	86.4776	95.4855	100.044	88.7269	77.758	81.0014
SD=10	Sim55	90.569	92.5291	93.9728	85.2663	80.5568	83.8512	89.6315	99.4029	92.5404	83.2117	94.273	91.2262	93.306	100.987	94.5927	85.6633
SD=10	Sim56	80.06	98.9675	79.8139	102.823	79.3009	94.5286	85.7556	81.2909	85.6357	83.1461	87.046	87.8855	81.6406	94.1707	95.4798	87.1567
SD=10	Sim57	93.6507	88.7042	85.6429	98.0942	93.7633	78.5158	82.1588	93.2317	93.5255	89.5969	88.4433	99.3748	76.1909	108.632	89.4379	90.096
SD=10	Sim58	92.0091	82.9647	84.5247	91.5532	78.0646	74.6588	75.1184	85.2263	80.6982	78.7472	78.166	77.0384	68.0905	89.0367	78.2392	86.5238
SD=10	Sim59	85.9805	89.3633	96.0407	89.3151	94.9653	84.7786	76.9248	94.455	81.066	67.2994	82.1418	74.5696	75.9294	75.2863	95.047	62.7719
SD=10	Sim60	88.1611	96.9282	80.776	92.0735	90.9012	79.8838	85.673	92.5694	92.0765	89.3366	93.2564	91.0078	93.1941	83.7564	73.3835	103.677
SD=10	Sim61	83.0378	94.305	77.2264	83.6159	91.3826	86.3268	87.0187	80.5452	84.5855	86.1599	99.0124	87.6969	89.712	89.6351	84.3893	78.3532
SD=10	Sim62	80.6074	78.6325	77.6976	93.5211	93.3284	85.0104	89.9877	101.125	82.6453	81.1553	84.4108	77.6472	85.3838	88.4013	81.3996	87.7434
SD=10	Sim63	89.304	90.0116	84.7053	85.5971	96.8374	84.7648	92.1294	91.9379	87.126	81.5626	92.7192	95.1963	85.8228	90.1792	89.6773	85.3185
SD=10	Sim64	83.1376	84.7984	87.0058	87.3944	77.9607	83.2392	75.6294	88.2248	91.0888	81.0543	84.532	83.4043	93.675	83.7573	96.3807	88.0889
SD=10	Sim65	96.6235	83.0497	92.8756	91.2215	110.562	97.028	91.316	90.8516	92.861	82.6829	83.4727	87.5954	85.0434	90.6371	99.492	89.386
SD=10	Sim66	82.8276	94.519	88.022	92.9412	91.7404	84.5972	78.0956	86.3246	87.531	90.132	81.7286	84.1474	98.3171	89.4565	97.7956	94.1516
SD=10	Sim67	81.5394	68.0146	90.3208	83.0141	78.1407	76.9463	82.6099	81.0804	82.0809	94.3003	77.0951	75.7573	76.9137	81.6247	82.2402	75.958
SD=10	Sim68	78.1937	74.8917	86.9841	77.2513	78.4167	87.4442	75.8354	71.3601	90.6742	80.9418	87.6553	84.6742	80.1112	85.4074	74.199	70.2988
SD=10	Sim69	87.8849	89.1615	90.6458	82.5916	85.9956	93.0126	89.2523	90.7142	94.4518	79.7288	89.6428	86.0563	79.9213	97.7217	84.3049	89.3883
SD=10	Sim70	83.7621	90.7457	87.9172	78.6834	92.1683	88.5501	95.196	76.1166	89.9613	91.555	81.4984	82.1206	78.5003	77.6249	88.1342	83.0435
SD=10	Sim71	79.3193	89.4428	81.6059	98.2464	90.8594	87.6745	82.7811	87.8626	82.2313	76.5736	90.2434	92.6352	91.1819	77.0558	83.9896	79.6611
SD=10	Sim72	89.0038	107.328	91.9767	89.9928	91.5758	93.3267	86.7421	88.0753	99.3028	78.7634	93.5257	86.375	97.8195	88.5278	86.7439	90.2897
SD=10	Sim73	73.6474	85.759	73.5541	76.5668	87.1832	80.443	73.3835	76.9063	81.4231	68.6526	78.366	91.5573	83.2206	82.554	77.4569	82.0065
SD=10	Sim74	90.8097	78.4044	80.204	87.5516	78.6988	83.3867	89.566	84.7678	74.0845	93.147	95.211	93.4103	77.3115	83.0889	97.5289	93.3574
SD=10	Sim75	75.8678	71.1537	74.8517	84.6302	92.1769	84.3849	63.9527	76.4199	92.3604	76.4648	89.9219	78.2441	72.7503	87.7221	75.4576	85.9609
SD=10	Sim76	82.0205	79.5616	88.8219	82.4163	82.7997	78.4943	85.6048	72.967	67.4574	72.3139	72.4085	97.0335	68.1422	76.6623	70.6088	81.3474
SD=10	Sim77	77.1383	95.7913	90.4743	91.4909	86.9774	87.8733	94.5736	97.2643	87.1015	92.9476	99.9961	91.2967	85.593	88.0661	90.4734	76.77
SD=10	Sim78	74.3855	84.15	81.7651	81.1855	84.6585	90.8671	89.6501	87.1507	77.1681	66.5653	91.8156	86.1898	92.5985	74.9314	90.3468	80.5686
SD=10	Sim79	97.9538	81.2629	83.2606	80.5106	82.1845	75.9874	73.8532	59.2667	85.5005	82.0959	92.3609	69.2726	82.6885	79.3475	99.881	83.7889
SD=10	Sim80	77.0077	87.5455	77.9905	77.1421	80.3489	79.7843	77.9425	81.9527	89.6948	81.9272	80.881	82.606	79.582	82.6616	75.1017	86.0772
SD=10	Sim81	80.3578	77.3491	83.1765	84.4771	81.2358	68.4841	69.1569	87.5234	83.3893	86.9855	94.0414	87.7583	86.3203	89.4194	97.4166	86.7792
SD=10	Sim82	97.9597	86.2636	78.459	86.1996	86.5794	84.9677	79.524	74.4766	85.131	80.1766	79.6129	66.2106	84.0469	87.1999	95.114	86.8795
SD=10	Sim83	82.7278	97.5693	81.4003	101.761	91.7116	71.6052	73.5737	89.6827	83.2464	99.3806	83.2732	89.2691	85.0792	87.8944	82.7859	101.321
SD=10	Sim84	87.4762	94.056	81.8618	77.9216	85.0414	90.4745	69.8807	84.4187	82.4186	87.3671	84.3035	72.4931	69.89	91.9651	85.0355	76.9742
SD=10	Sim85	82.5047	77.7813	93.8012	93.4295	80.7148	65.9276	96.9087	73.4667	87.9746	82.3016	75.5104	83.1313	93.0608	78.4931	83.2132	78.9417
SD=10	Sim86	81.0957	70.8462	82.3787	90.9193	84.1441	90.1001	79.9979	75.6859	81.9403	77.456	71.8567	88.5587	84.3912	87.0805	78.9207	91.7365
SD=10	Sim87	73.6052	77.3538	78.8142	74.6766	80.3351	83.8436	93.2162	96.477	80.3607	92.1575	90.1277	70.3548	81.9344	82.5194	81.4137	73.9264
SD=10	Sim88	77.2686	85.2143	87.6017	75.9338	86.7019	88.8775	84.9356	68.6722	81.1451	70.6692	68.4034	90.1502	80.7988	80.7815	76.9853	80.0513
SD=10	Sim89	76.8177	76.5808	97.9608	87.0075	81.2321	72.979	88.6171	89.0496	89.578	79.0141	86.9462	82.5749	86.5481	76.9327	83.7359	74.8834
SD=10	Sim90	90.5507	85.6446	82.6004	80.8935	86.2648	82.4569	79.5451	85.2812	72.2112	94.6477	101.049	84.4336	84.3416	76.881	79.8837	85.4252
SD=10	Sim91	76.0546	80.021	84.2177	80.8563	94.0059	68.2268	83.9661	71.0892	80.0268	92.2583	90.1854	62.525	76.9437	81.458	92.8147	70.6688
SD=10	Sim92	84.0229	93.7909	85.4365	90.643	88.0136	100.971	98.4703	81.9646	83.9521	90.6641	92.2786	77.6586	94.4243	93.2596	76.8201	103.987
SD=10	Sim93	89.5768	89.6827	89.3306	83.7457	79.4549	90.3346	76.3315	105.906	85.8558	85.4134	83.6106	89.6093	97.32	88.2943	83.1288	88.223
SD=10	Sim94	82.2399	85.6102	89.2266	86.0889	82.8026	84.065	84.5087	86.2178	79.1078	81.5395	91.9782	88.7877	89.4485	84.7914	84.7841	90.5014
SD=10	Sim95	80.7674	88.2508	86.133	85.1128	94.5296	90.193	94.9359	69.4115	93.7126	82.233	86.9741	98.3652	95.6116	94.5055	82.6176	96.8507
SD=10	Sim96	90.5192	90.5859	85.7259	91.6383	77.8879	86.5615	88.3772	75.0471	90.4248	84.8411	90.089	90.9944	91.7873	89.6775	75.5547	90.9114
SD=10	Sim97	91.4093	78.5037	88.5973	80.5133	79.7895	82.4159	85.888	78.9146	84.7121	81.5773	75.3346	76.8712	77.2513	87.8484	89.0897	93.6736
SD=10	Sim98	76.102	78.7526	79.5345	72.0265	78.6786	84.8626	89.0119	68.1342	73.2235	81.1489	82.1611	83.8717	69.7796	83.6353	83.9756	80.4527
SD=10	Sim99	76.2039	87.3921	77.1046	82.1849	85.5258	81.6893	92.1515	88.2102	83.8354	73.9148	89.4596	84.9443	89.1965	84.9704	86.068	89.7949
Result	ID	DBP01	DBP02	DBP03	DBP04	DBP05	DBP06	DBP07	DBP08	DBP09	DBP10	DBP11	DBP12	DBP13	DBP14	DBP15	DBP16
SD=15	Sim00	81.8709	99.1468	61.7548	83.1823	80.53	59.287	76.9643	86.1516	84.6581	77.1467	83.7507	77.8864	77.27	77.5697	83.7998	73.0029
SD=15	Sim01	83.9087	69.3258	81.0123	83.6719	83.359	123.345	66.7178	107.943	95.1391	100.386	82.2417	87.6149	88.4687	83.2472	106.414	86.169
SD=15	Sim02	104.392	86.3182	98.4327	67.5571	84.9511	83.3018	67.3691	70.7525	85.3386	88.5258	70.4217	85.3647	76.7704	94.9052	70.3322	68.5762
SD=15	Sim03	89.2012	104.893	89.6955	88.6992	64.6519	73.7487	86.0078	88.1202	81.2667	88.971	107.575	85.0434	85.1493	61.9739	71.4675	87.4761
SD=15	Sim04	74.254	104.022	94.9777	64.056	89.7869	92.2912	87.025	104.872	92.0505	81.5057	67.163	80.7108	74.3429	85.4789	83.0477	83.4058
SD=15	Sim05	97.8026	96.1393	73.7016	80.6107	78.9147	82.2365	94.8197	85.3097	102.095	91.5662	71.1482	97.3137	111.798	79.0358	92.127	91.7544
SD=15	Sim06	72.0586	109.451	91.168	77.1958	99.3728	103.368	80.2783	78.6067	69.5681	52.4993	69.2897	90.4233	80.2824	87.0227	82.1318	82.9174
SD=15	Sim07	81.0482	84.3575	86.4187	100.61	79.3105	72.9087	91.9774	84.6616	91.4914	78.5167	86.516	90.4765	97.5851	81.0125	80.8968	92.9695
SD=15	Sim08	96.0695	68.2333	77.9548	80.5207	82.7654	76.8991	81.4765	102.195	104.753	98.2871	93.7413	71.6954	82.2139	73.3036	80.8162	86.1924
SD=15	Sim09	90.868	84.1775	106.165	80.6201	103.518	81.9456	85.6881	104.903	100.679	79.1054	86.3431	78.1258	87.7238	116.063	95.7618	91.662
SD=15	Sim10	87.9026	62.4039	64.1074	78.1485	99.6845	74.4303	90.8187	90.718	105.189	80.9431	81.2567	92.7658	78.0813	82.6079	94.2581	96.1374
SD=15	Sim11	86.5025	75.2053	98.9041	105.641	85.5695	75.5157	91.3525	91.3007	82.7105	72.2079	60.833	75.2772	93.4724	65.8275	72.8172	89.0621
SD=15	Sim12	78.1005	83.1292	71.6448	100.385	76.0988	98.338	74.6569	93.0557	87.4935	87.9285	72.7098	80.044	82.1	95.5182	91.8179	88.2344
SD=15	Sim13	74.5553	105.467	80.5697	100.564	83.5806	62.1937	106.349	99.7367	90.45	95.9297	91.49	85.9059	91.3229	79.9259	92.1806	88.0643
SD=15	Sim14	67.2086	78.0683	89.9785	90.3668	69.9792	57.235	85.7455	75.6898	73.1151	81.9955	77.8762	71.9181	66.5195	76.9356	69.9004	82.0974
SD=15	Sim15	78.4178	84.3416	77.1497	86.1471	76.8207	66.504	78.6604	81.7325	60.6585	78.3769	75.2618	69.922	84.9438	88.2447	79.1998	64.7889
SD=15	Sim16	88.7693	84.5458	70.2114	83.5863	102.29	92.7412	98.1769	75.7136	71.3792	77.6272	86.9485	95.7857	74.2904	87.8744	72.793	96.1527
SD=15	Sim17	70.2754	77.2969	81.4655	82.7897	67.3423	80.6944	81.8281	75.357	77.5971	100.578	103.274	92.7039	73.6962	94.9476	95.0381	78.3899
SD=15	Sim18	119.184	99.8908	86.8224	80.8287	85.9937	101.317	100.87	88.9555	80.6547	105.422	105.784	86.778	96.054	91.3827	73.2854	99.2083
SD=15	Sim19	93.3786	77.1846	65.2459	80.8004	68.222	90.944	89.753	90.6637	91.1732	101.658	66.6137	100.511	62.0435	96.4586	74.1904	84.8375
SD=15	Sim20	69.8775	96.778	106.516	68.0761	76.8381	78.4359	81.2804	98.2706	69.2757	99.6799	60.9768	89.3589	73.787	81.4526	85.8532	100.671
SD=15	Sim21	71.9742	118.194	83.5341	82.2251	89.3986	75.327	87.2699	89.6691	90.9457	76.095	71.598	63.0499	79.3588	83.4656	96.794	86.9811
SD=15	Sim22	88.982	67.1037	76.8336	107.388	72.7208	86.2376	83.4203	68.6791	87.6575	73.4719	85.9739	69.0354	86.2099	86.0306	80.2738	92.4069
SD=15	Sim23	92.7733	84.5133	73.7459	80.4148	80.9935	51.4714	101.102	70.223	89.6079	80.8526	71.6358	94.4506	73.8366	57.0814	74.8335	79.9865
SD=15	Sim24	93.1658	76.0234	88.7102	94.7936	94.7219	77.5386	107.719	102.748	93.84	94.0015	90.0427	92.4915	70.5925	94.8688	75.256	87.2457
SD=15	Sim25	84.7878	64.5526	96.6826	92.0258	96.2384	84.9005	92.706	84.4375	88.86	76.3437	85.7849	107.555	89.903	102.698	103.782	83.6221
SD=15	Sim26	80.3319	97.3715	80.6256	98.0527	79.4124	74.2843	75.4046	78.5218	97.9099	72.1784	102.479	82.8485	95.3809	62.3502	78.0084	106.02
SD=15	Sim27	76.0316	77.195	93.3588	97.1846	87.1401	67.1356	75.4671	80.6138	83.9577	105.211	89.7381	64.9061	107.934	91.8454	72.6914	67.2497
SD=15	Sim28	77.1575	75.0755	80.1287	89.2375	81.9936	80.6065	84.6911	78.0884	81.4594	47.7067	67.4217	85.9384	97.0863	81.6765	74.5269	92.6018
SD=15	Sim29	91.3412	93.7992	84.0279	86.7555	79.1609	63.7268	83.0512	82.5007	94.047	86.086	87.9303	85.3603	79.7037	85.3852	88.4881	74.4712
SD=15	Sim30	87.9744	91.9996	92.8455	92.7325	106.176	76.476	88.2462	75.5941	92.8994	101.311	80.8821	69.0692	100.583	85.2157	99.5098	92.2399
SD=15	Sim31	74.5269	72.7631	91.8219	64.986	78.3617	85.1777	82.5287	76.7081	78.0817	102.865	61.4426	67.9094	64.8946	82.2477	58.5156	61.7962
SD=15	Sim32	83.7329	79.3145	92.4655	72.1247	75.0883	94.4282	57.6043	85.0895	78.5185	66.3107	96.6644	84.9879	92.4729	94.6267	71.2296	75.0669
SD=15	Sim33	81.6493	102.138	88.7491	85.5251	96.9393	109.175	84.9764	96.7915	95.7356	93.1374	88.9702	83.641	95.9708	75.54	100.815	87.8565
SD=15	Sim34	63.6483	98.552	114.72	75.8218	95.3328	96.0969	91.741	98.0967	94.0487	73.0336	110.005	96.1955	81.3833	82.7611	90.5896	84.3018
SD=15	Sim35	72.8033	69.611	68.3429	69.6445	65.7105	66.3808	79.276	76.9638	59.9884	80.9599	86.6598	85.1033	77.6706	61.9769	73.7376	71.3388
SD=15	Sim36	89.8194	84.8417	89.4739	95.8913	83.6427	87.9425	88.4111	76.942	86.2725	85.9863	87.403	77.0992	89.8082	82.5473	93.4562	90.4425
SD=15	Sim37	87.0844	75.1053	51.5185	86.3972	64.797	70.1729	106.933	83.3378	89.4316	66.6165	79.3234	94.1978	83.6655	89.5761	91.061	97.8313
SD=15	Sim38	88.5728	75.1054	89.0952	69.9156	68.9436	68.1647	61.6641	101.642	88.4356	81.4359	78.3265	66.4894	96.0348	70.8196	86.207	84.1406
SD=15	Sim39	79.1692	67.4748	95.7108	94.1975	81.1898	89.383	103.085	92.0444	79.3847	89.8352	75.1473	83.6383	108.336	82.3257	81.0994	99.2444
SD=15	Sim40	87.7222	74.7604	73.9238	70.4742	77.1708	89.0317	82.2699	89.973	80.5355	69.8457	83.7602	86.2738	100.505	72.4135	73.6329	70.7246
SD=15	Sim41	86.3575	80.3169	86.7342	74.2542	69.6099	86.8866	80.4281	96.7209	91.2362	88.2098	74.7871	99.1618	72.2519	94.9779	87.0128	78.9381
SD=15	Sim42	73.4077	84.8689	71.6591	87.0219	96.348	102.167	82.9794	98.2555	95.5598	93.2967	93.7909	105.745	89.5504	92.941	97.3921	73.8746
SD=15	Sim43	101.493	89.2113	107.083	92.6143	95.5927	86.9659	90.9627	114.69	99.9209	87.1953	71.6124	82.3556	80.1634	84.7983	73.1129	93.064
SD=15	Sim44	84.4033	91.7371	122.961	88.9187	82.4152	92.7955	95.7948	99.4036	92.6193	70.6589	87.2446	91.997	95.8493	98.4563	79.0642	82.2152
SD=15	Sim45	80.5445	90.3308	68.1172	88.355	100.565	78.4836	80.4669	88.4583	80.6383	84.5913	62.1119	75.5784	98.1045	65.1713	83.3199	99.1613
SD=15	Sim46	93.1842	94.8742	101.172	74.6973	93.3499	80.7752	70.8652	94.0795	58.1824	112.626	100.088	77.5638	100.63	100.055	84.3614	93.375
SD=15	Sim47	71.7975	63.7591	86.1876	72.0953	65.3705	93.2572	87.0824	80.3716	90.7136	77.7537	83.2725	95.797	64.9441	87.3812	79.2011	69.0471
SD=15	Sim48	69.2049	84.4189	88.6217	102.764	85.6775	88.3289	101.296	96.7713	79.0149	68.7767	74.1572	75.1633	70.5851	102.399	99.5078	90.9845
SD=15	Sim49	92.1079	97.4203	98.7335	77.5874	78.1272	79.3373	85.5966	88.7972	77.3467	91.2772	78.0292	63.4219	79.1008	80.5025	82.0632	79.6531
SD=15	Sim50	94.3965	87.3733	83.2022	78.5109	74.6028	88.2069	88.7691	104.743	78.6705	80.6845	80.9722	94.344	99.2028	85.5983	96.7339	83.2698
SD=15	Sim51	77.7002	84.3334	96.8034	70.6228	77.7339	80.786	87.124	71.8779	84.5617	79.2277	79.5252	61.0383	69.4804	89.4098	89.1869	74.6214
SD=15	Sim52	72.5459	82.0365	86.9869	85.5063	73.2335	82.1338	74.9022	84.7399	101.12	86.2839	78.2734	102.836	98.8935	92.8003	67.6386	65.9901
SD=15	Sim53	72.4745	82.0711	89.0594	94.8291	103.6	91.662	80.9059	84.5352	98.5083	101.585	82.5166	79.2439	94.4179	95.6948	87.6984	107.672
SD=15	Sim54	100.813	75.6463	68.378	82.3842	75.6312	83.3143	73.2258	76.5837	88.8604	85.7908	77.1567	98.9615	94.6951	93.8105	95.3839	100.251
SD=15	Sim55	92.3458	97.3108	102.876	74.6669	90.6066	77.7585	72.127	85.9905	103.28	74.4152	100.327	91.4101	102.875	80.443	76.4546	94.9533
SD=15	Sim56	91.5456	74.554	108.332	95.6274	86.5518	101.733	82.2318	94.716	80.4896	87.1984	105.2	71.137	94.9704	72.4785	93.4197	73.1513
SD=15	Sim57	75.7079	85.145	96.3516	90.6422	108.599	82.8151	98.6848	83.0352	84.4946	94.3822	81.0753	69.3843	83.7261	75.8147	93.1269	90.8166
SD=15	Sim58	82.6832	86.4428	78.0119	82.589	93.1663	78.0076	97.5914	71.6818	61.4586	89.2931	75.6038	100.982	67.8232	87.8816	90.0152	72.9981
SD=15	Sim59	84.0743	81.4568	92.6938	87.433	89.2898	93.3786	72.1336	75.9528	90.6977	71.0503	71.86	81.903	69.3967	75.5847	89.7504	70.959
SD=15	Sim60	100.404	79.9832	88.2609	98.8401	79.2217	85.1193	69.0224	81.9114	98.7567	78.7244	94.3665	94.4191	100.812	92.1679	93.9294	92.894
SD=15	Sim61	90.5731	73.5704	67.4066	91.8519	86.0146	95.0852	110.485	75.9386	79.3107	73.8639	89.5801	73.0457	77.1783	86.1207	73.6742	81.185
SD=15	Sim62	74.7249	82.6758	84.654	87.1228	105.301	93.8383	93.1806	94.9885	83.552	82.1429	78.5556	71.1649	99.6057	88.6806	87.8981	85.3917
SD=15	Sim63	111.771	85.4127	87.6671	91.061	113.979	76.9607	88.5311	108.899	96.7553	94.3973	95.3218	107.711	90.5596	94.3055	95.9487	96.6328
SD=15	Sim64	92.7579	84.5739	96.6259	82.5024	82.6185	82.6007	65.3369	91.3646	77.7731	87.4967	94.2351	102.507	88.6742	90.4543	76.9768	89.2689
SD=15	Sim65	87.9112	87.5438	90.9526	89.9456	94.1261	93.192	78.772	97.5174	81.0664	105.36	87.5128	78.3225	99.4648	94.5619	89.7654	96.3898
SD=15	Sim66	81.4358	86.9688	79.8481	95.5327	101.782	87.5337	71.8868	83.4786	76.3459	84.0416	81.5581	86.2629	71.0508	89.258	96.6383	82.084
SD=15	Sim67	91.5402	60.9458	79.0644	88.1001	78.4221	78.7694	94.8734	62.7462	112.565	72.9197	94.0736	83.369	83.2262	91.44	76.3416	92.6008
SD=15	Sim68	81.3428	80.0964	86.1767	92.8632	83.2532	86.6674	101.341	97.8283	67.3759	85.0305	89.7153	80.3432	85.1756	91.5331	101.402	81.895
SD=15	Sim69	92.962	89.3271	77.0242	93.1028	93.5924	82.9817	70.4594	89.3408	85.2588	88.9762	85.3071	89.7503	94.6906	99.9448	90.2867	74.2017
SD=15	Sim70	90.1781	81.4295	74.3264	107.088	88.796	98.0295	110.264	63.6563	86.8084	68.142	91.0118	84.9812	86.9458	86.9419	84.1862	80.8798
SD=15	Sim71	79.7678	80.986	80.731	102.918	89.6744	84.8934	99.0716	95.4219	90.66	80.8618	94.8891	76.8003	91.607	67.4087	79.306	89.5487
SD=15	Sim72	81.2175	107.2	78.5257	86.042	89.4598	96.2794	72.4939	97.3163	83.0746	72.8329	114.359	99.3994	109.441	100.589	94.0028	101.693
SD=15	Sim73	88.6611	82.2153	77.4876	82.8599	80.2267	84.0735	67.3027	85.603	101.167	91.1745	88.0327	84.2738	92.1718	85.5579	80.7111	76.9187
SD=15	Sim74	83.8825	84.5899	90.345	80.9843	92.3104	74.5427	74.3736	105.082	90.493	77.4574	98.4386	66.7742	104.71	97.6983	103.565	84.0528
SD=15	Sim75	83.4011	68.741	86.7188	75.87	80.6317	77.3226	88.8258	90.212	60.2726	93.2983	89.3366	73.7755	77.8389	78.767	94.107	92.3239
SD=15	Sim76	81.5154	79.9408	110.622	86.2669	83.5225	70.1276	75.3337	91.1592	81.7467	60.0212	106.806	90.404	76.645	85.0357	79.6074	85.6914
SD=15	Sim77	72.0168	69.7606	77.433	95.6829	96.7355	85.1482	86.1625	77.039	84.6313	100.521	93.6887	75.7596	103.332	90.3643	107.302	111.918
SD=15	Sim78	88.6163	97.6535	71.0553	71.7919	81.3276	74.4013	82.1529	97.4535	80.122	85.6282	83.3247	97.6	84.1277	97.9824	72.0115	97.9879
SD=15	Sim79	74.7862	98.9312	90.76	86.6822	59.7492	80.5645	81.289	79.1566	98.6602	87.5742	76.8505	70.2985	80.4182	81.3869	74.4962	84.7129
SD=15	Sim80	90.4372	69.5019	95.4087	80.6743	81.0544	93.4096	104.82	77.4273	88.1413	96.4819	81.3666	97.4179	77.2834	82.8188	82.9558	87.4011
SD=15	Sim81	91.7899	81.8344	96.914	87.196	93.4292	91.307	87.6001	67.7748	79.4337	90.0013	64.8188	105.727	86.0146	97.5109	87.0767	88.2004
SD=15	Sim82	85.3086	75.5583	77.1585	99.445	77.3089	87.953	90.7662	88.0211	81.7049	89.3646	101.499	83.3238	72.8548	79.4292	87.4056	96.6027
SD=15	Sim83	82.9932	77.8128	86.6024	104.153	101.061	91.2952	98.5842	91.6705	92.5901	80.4631	77.7348	82.0608	76.2656	78.8256	100.805	78.3796
SD=15	Sim84	95.1721	80.4496	92.1586	67.9183	105.342	83.6453	77.3077	82.6279	106.057	97.5324	83.8569	88.3759	93.1094	103.736	84.7695	84.6478
SD=15	Sim85	72.5682	77.341	81.3151	96.5947	103.524	72.1666	92.9443	74.7447	78.8692	94.1815	76.6949	90.6191	50.7294	91.4763	91.4962	82.3342
SD=15	Sim86	69.7063	66.9528	72.7727	82.5573	99.7943	81.7443	101.684	93.7992	87.3646	85.2106	81.6436	74.0596	92.3857	65.8838	84.3763	78.5356
SD=15	Sim87	65.0783	106.587	72.7969	70.1699	84.3215	81.4695	90.225	90.784	80.2847	87.9016	81.1542	82.4847	84.7472	91.7889	70.1402	68.8684
SD=15	Sim88	85.6465	75.6279	94.9697	72.5733	75.5693	87.2032	87.0129	70.76	81.7302	78.7464	84.6986	65.6832	76.6793	83.3999	72.4842	82.2233
SD=15	Sim89	104.41	95.9753	81.4779	86.7429	86.7228	89.5268	88.3577	78.1199	89.4714	104.323	87.9179	86.4454	78.528	71.1614	81.0238	89.4823
SD=15	Sim90	90.2154	71.7148	92.3113	104.32	84.511	105.219	82.9171	95.6211	87.58	94.1709	112.629	90.589	78.0295	86.4738	86.4777	86.8349
SD=15	Sim91	87.9693	72.2096	65.8256	67.1286	67.9378	72.9656	71.3285	83.1454	79.4069	78.4595	57.4887	85.5912	65.3991	70.167	77.9903	74.3941
SD=15	Sim92	88.8793	75.2007	86.0899	79.0508	94.7444	99.8481	92.3873	77.9124	89.9823	84.2024	98.8731	74.7574	78.6057	84.5316	81.4086	94.645
SD=15	Sim93	92.9847	80.2955	82.1191	84.1476	90.2888	79.131	68.7483	84.9066	75.8726	82.0515	74.2156	99.763	103.095	70.0181	82.8906	71.5912
SD=15	Sim94	81.225	70.513	79.7132	94.7069	74.864	64.5721	98.5729	75.9034	85.3552	79.9848	110.91	73.075	68.1345	62.5909	81.7633	77.7445
SD=15	Sim95	54.8801	88.0858	93.4804	81.7207	74.3502	101.59	75.6098	92.9476	82.8486	81.7673	66.1501	96.0554	81.9268	66.3869	73.8694	82.4395
SD=15	Sim96	86.1485	81.582	77.4856	72.025	94.0583	95.2429	85.4023	100.815	102.351	89.257	88.6076	89.9911	80.2014	97.1318	69.9642	92.4791
SD=15	Sim97	74.3639	87.9673	75.5855	89.5257	97.8578	91.9544	91.3072	78.5049	88.8453	81.8803	97.1181	81.8317	86.2612	88.7257	69.7588	64.7806
SD=15	Sim98	105.285	107.895	82.842	90.118	78.0808	82.0994	77.2279	79.2955	67.9876	75.7198	99.3082	70.3897	75.4821	80.2934	100.629	72.9073
SD=15	Sim99	82.7583	76.8066	87.1177	81.5208	86.2519	83.3481	95.0778	87.6748	90.0676	83.1979	82.001	77.2461	73.8063	80.0203	103.555	114.036
Result	ID	DBP01	DBP02	DBP03	DBP04	DBP05	DBP06	DBP07	DBP08	DBP09	DBP10	DBP11	DBP12	DBP13	DBP14	DBP15	DBP16
SD=20	Sim00	43.2831	66.8596	72.6288	71.8112	76.9356	80.4499	112.554	96.8676	70.6289	77.1798	96.935	39.9786	102.768	87.397	80.5931	91.3823
SD=20	Sim01	80.6471	95.5504	116.162	57.3599	66.3685	86.4454	77.622	78.7256	76.8011	76.6914	96.5587	79.1548	121.81	81.8189	63.2105	90.4846
SD=20	Sim02	110.818	105.522	90.175	85.326	70.9435	77.3207	102.964	78.7927	80.9262	95.7329	107.147	76.1333	75.0319	86.7919	123.792	73.9626
SD=20	Sim03	75.1675	93.7378	82.8538	97.0698	76.1856	92.938	78.2048	66.108	90.4089	91.9897	108.146	88.0853	95.9666	79.1937	76.9131	99.0208
SD=20	Sim04	63.13	96.8236	81.7563	87.2574	79.7695	99.0579	94.83	70.8479	70.4325	92.875	103.301	83.7939	64.7361	100.467	99.7324	91.7034
SD=20	Sim05	57.3715	82.1639	74.838	118.969	68.6054	77.528	65.3115	86.7202	99.2894	82.8231	96.537	93.1124	84.4769	105.433	73.5544	95.6945
SD=20	Sim06	81.8094	82.3552	112.174	93.7594	102.738	93.1743	66.5559	110.03	86.2578	77.3914	86.3576	85.6454	72.4977	66.5096	61.9232	88.0604
SD=20	Sim07	48.1543	84.639	73.0022	63.5238	73.2688	94.9071	79.0365	73.7368	70.9379	83.2564	95.7152	88.5385	71.6705	69.763	102.821	104.821
SD=20	Sim08	101.672	45.6624	96.3859	102.174	74.7152	89.3589	92.561	80.2762	105.775	94.8643	105.032	90.242	85.8104	104.249	77.6628	102.871
SD=20	Sim09	103.311	95.4475	89.2488	75.8432	83.6459	78.2578	108.021	108.439	68.158	88.178	86.9527	103.354	89.3818	97.0223	88.5525	79.5114
SD=20	Sim10	74.3188	84.9455	101.995	96.774	106.778	81.0185	99.4382	87.0461	85.2324	86.2537	94.962	57.9999	98.1376	69.9896	90.9977	69.546
SD=20	Sim11	84.6909	78.8477	72.1876	101.828	63.3666	78.2393	103.486	86.7764	109.306	95.4483	85.5705	105.643	111.274	80.2593	97.4383	64.7151
SD=20	Sim12	73.6597	105.477	93.5217	94.3453	85.1403	77.4924	81.2884	70.6943	72.5635	73.1607	87.0201	83.2079	83.1462	58.7191	101.646	76.4709
SD=20	Sim13	75.0117	100.26	68.4686	102.883	108.27	103.751	110.679	93.5207	74.281	71.0105	67.2957	104.785	74.3549	76.9607	63.9266	75.6099
SD=20	Sim14	65.8147	68.7468	91.5428	88.2393	90.9986	77.1056	80.8682	60.1899	91.8472	101.537	95.7902	72.9206	97.9113	80.0751	91.1787	68.0553
SD=20	Sim15	98.8111	82.388	56.1027	68.8843	102.041	43.3277	94.2334	102.26	101.9	85.5762	78.9415	90.2623	85.1201	77.0975	85.1309	72.3507
SD=20	Sim16	89.7495	76.5745	112.776	85.7225	77.351	78.7098	70.2085	86.1213	82.2307	99.2467	70.7941	98.2586	90.0038	69.4643	89.3299	74.6591
SD=20	Sim17	67.4595	88.662	87.9444	89.7342	78.4118	80.1582	76.8646	119.2	111.601	54.3401	71.9649	77.6154	83.1222	89.4126	109.217	81.6505
SD=20	Sim18	83.6318	87.7172	107.123	69.3723	105.367	79.8166	70.1775	68.7632	108.071	92.0239	95.0404	81.7228	83.8941	99.3968	96.5742	86.3283
SD=20	Sim19	92.7613	76.8494	90.0629	71.6324	75.3091	60.6682	73.8507	79.5419	85.0507	70.0564	90.0208	106.81	92.2121	103.205	88.5647	76.5026
SD=20	Sim20	92.7216	91.9317	89.7223	81.4026	103.823	76.2917	82.2981	93.3104	88.485	106.776	94.8853	66.6531	111.219	86.8343	91.8518	92.09
SD=20	Sim21	84.389	68.5551	83.028	89.8816	85.184	95.607	76.2173	95.624	109.446	62.7636	90.7767	83.1842	65.9796	100.409	68.8764	90.6974
SD=20	Sim22	45.9665	91.0936	107.24	75.9573	77.0595	100.959	109.489	84.7048	98.6075	113.994	81.7625	103.721	96.4017	110.895	94.7252	97.0349
SD=20	Sim23	82.0127	101.736	78.6776	60.7434	68.3274	63.0506	81.123	66.7574	70.9211	82.8749	106.492	97.3091	73.9279	54.6039	79.7126	96.154
SD=20	Sim24	89.1195	100.343	77.1926	81.5754	62.851	75.1135	50.5756	108.245	97.3664	91.4117	110.765	106.212	107.275	73.5207	66.301	82.5243
SD=20	Sim25	71.973	108.8	126.455	104.164	136.505	96.8199	59.9507	94.4158	71.6189	82.4271	95.709	62.8976	103.672	89.1534	76.0752	89.879
SD=20	Sim26	75.8807	53.3368	104.098	82.2595	70.6203	77.3028	91.2179	103.986	76.8463	105.223	96.5111	84.8655	94.3237	115.032	80.1228	78.1968
SD=20	Sim27	71.6169	78.0396	84.834	98.2623	88.3151	49.3214	80.7535	79.7388	99.7491	104.657	67.7025	61.4382	87.0692	97.4158	70.5441	111.591
SD=20	Sim28	59.1371	87.6616	92.0465	68.7892	71.5339	80.0114	83.5662	78.9717	82.0441	97.3589	89.3574	83.4387	64.0479	98.5086	86.7089	67.0885
SD=20	Sim29	94.166	72.0616	75.1975	60.1358	83.8856	74.1225	91.7586	69.6413	65.1656	86.2102	105.259	47.0485	69.4969	84.1191	76.5148	84.222
SD=20	Sim30	89.3528	83.1464	95.4768	66.6691	62.2966	89.3519	78.5847	78.052	90.3457	89.792	80.8791	76.5585	89.8906	78.875	72.5007	96.6671
SD=20	Sim31	84.4363	66.3789	73.2998	84.3805	64.0851	83.5956	112.664	81.4083	57.1505	98.0144	66.0813	102.032	101.198	84.5626	87.7998	61.7384
SD=20	Sim32	75.544	97.6244	87.1122	82.1073	82.6796	76.538	90.68	90.8672	71.3772	82.3505	59.1522	97.9264	58.3431	73.4204	61.2933	89.0333
SD=20	Sim33	75.4955	73.8045	72.5266	89.4599	88.6793	63.7799	84.3612	95.8764	89.3886	77.3176	92.332	77.296	91.5892	81.1719	114.742	77.5085
SD=20	Sim34	104.62	107.313	93.6801	73.6619	81.3869	107.992	83.3846	86.0354	83.8983	82.8065	107.649	79.546	78.9482	74.3017	88.7743	97.8192
SD=20	Sim35	105.958	58.7731	89.434	91.6438	82.9016	77.4226	111.374	71.5837	69.4675	82.7067	78.1642	75.5059	104.359	84.3704	100.353	80.7642
SD=20	Sim36	81.4502	80.626	100.495	129.431	93.8333	82.3357	104.803	78.1674	104.818	73.4653	93.1071	60.68	98.6769	99.4273	69.6761	83.9874
SD=20	Sim37	106.938	108.871	103.166	72.6463	91.6294	80.3289	95.9205	96.1008	95.6772	85.678	99.2049	54.2453	102.33	76.357	76.8979	73.1733
SD=20	Sim38	88.5266	64.2645	66.4345	83.5726	61.4215	82.0313	82.1782	85.6847	78.0896	62.6688	56.0375	90.1225	70.0882	75.9792	64.3383	66.847
SD=20	Sim39	89.3814	81.6862	79.6652	81.8986	78.666	95.7232	71.896	81.7083	72.2001	82.129	75.977	88.4381	74.0426	74.1626	78.0094	82.8081
SD=20	Sim40	63.9263	52.8156	87.5798	67.3113	103.641	70.5095	89.6671	69.3102	73.5797	74.7589	100.668	97.4891	91.3282	106.694	82.1714	70.4536
SD=20	Sim41	93.1289	65.081	85.0648	67.9862	75.2395	79.0356	89.2733	73.6447	78.3186	60.91	84.8877	69.0534	63.4467	87.5233	75.1908	70.0669
SD=20	Sim42	95.7133	82.2625	86.3094	95.5638	86.0273	78.2108	90.6994	88.0219	121.876	95.411	90.0767	78.6266	90.1236	89.3386	98.3327	78.2151
SD=20	Sim43	100.825	109.986	101.541	88.9176	92.2751	97.3394	58.196	97.764	97.8865	120.106	66.268	95.632	118.34	81.956	94.0982	77.6263
SD=20	Sim44	74.016	102.924	92.4943	81.0756	67.6288	98.5414	83.4263	101.706	103.3	93.7793	87.1969	81.5273	101.44	120.567	91.305	57.8901
SD=20	Sim45	91.1607	80.4362	59.6328	84.467	78.4034	80.3507	92.9772	89.8733	75.6253	71.8369	81.8389	93.4578	82.2618	59.5611	83.1174	71.8367
SD=20	Sim46	99.7618	69.2716	96.6495	96.8924	101.4	83.4249	98.2875	98.5922	86.8901	88.5343	104.624	74.8144	92.7117	91.2757	108.365	61.8347
SD=20	Sim47	74.446	70.892	78.7356	98.0411	80.9246	88.9052	80.0265	85.1698	90.6835	51.9268	88.7936	100.752	78.878	105.493	93.4097	65.3723
SD=20	Sim48	104.92	107.468	78.3075	99.187	73.7236	82.4286	83.8893	73.3708	65.7546	68.0628	76.9404	97.6388	84.7304	89.7596	71.958	75.5244
SD=20	Sim49	88.6836	93.0226	115.687	84.1227	66.7333	58.7441	79.8105	68.5051	78.485	74.5761	69.2912	61.8983	72.7606	81.3104	80.4714	97.0515
SD=20	Sim50	53.8159	86.5113	92.8663	98.12	74.3889	85.3803	92.2905	72.2011	91.1665	71.9867	92.8708	102.743	93.5892	95.4065	76.5463	96.711
SD=20	Sim51	89.7884	61.8003	57.2265	57.5677	80.2205	89.4578	81.2141	93.5026	79.2867	94.1213	77.1907	67.6518	67.7051	40.2753	83.1842	82.0097
SD=20	Sim52	85.2671	80.8259	101.978	93.6928	85.8385	81.7125	93.6255	117.607	100.543	107.4	78.0656	59.7886	95.4493	64.918	65.17	74.8352
SD=20	Sim53	123.77	97.7825	83.8231	57.0509	113.875	79.4603	73.6969	68.5159	98.2292	103.943	121.551	67.1838	92.1859	83.6238	93.5026	94.4588
SD=20	Sim54	84.917	84.1825	87.113	93.53	116.3	93.2986	62.1451	72.1288	61.5892	101.012	81.6784	95.9212	95.618	85.1119	76.7818	107.683
SD=20	Sim55	98.8959	113.946	76.1871	83.7118	84.7986	107.742	107.52	75.1755	81.6687	101.873	99.0551	109.48	81.6867	90.8348	91.5543	74.3676
SD=20	Sim56	94.9323	52.1477	79.4454	94.6102	77.9352	105.997	86.5767	113.317	101.276	78.144	69.4177	93.8574	72.4945	103.09	80.8911	82.5412
SD=20	Sim57	75.9548	102.857	93.9339	78.1473	84.5103	89.5496	84.5624	86.9147	92.2735	116.739	55.927	80.9719	74.3752	86.6258	69.32	87.995
SD=20	Sim58	71.993	76.6248	98.0416	80.6185	99.7672	75.1051	84.7262	77.3377	95.2251	103.964	65.0947	89.8111	83.595	72.4295	85.8196	86.0569
SD=20	Sim59	77.9121	56.9002	79.9219	88.5027	87.3521	80.1448	78.6726	66.6635	88.3019	87.6405	83.5401	65.2838	92.8364	88.5648	132.502	52.5782
SD=20	Sim60	69.3757	93.1616	89.0915	93.4519	109.407	73.9006	107.016	81.7609	100.365	108.775	95.3542	80.5243	64.4452	89.423	75.7631	72.1693
SD=20	Sim61	69.5201	94.7356	72.7215	61.1752	113.125	99.0609	83.8395	75.049	80.2933	85.0744	61.4407	90.9566	76.09	100.828	78.1239	97.3791
SD=20	Sim62	86.6088	110.122	84.4242	81.8506	81.9594	92.6164	115.358	124.038	83.1227	83.4322	78.5248	105.093	82.7299	71.3752	58.7266	104.954
SD=20	Sim63	75.999	64.4885	99.8519	73.0951	75.3083	100.354	94.7527	116.773	67.7432	77.5627	99.6973	78.3756	83.4744	91.8703	84.7491	83.3691
SD=20	Sim64	80.1251	85.3569	101.168	108.328	68.4258	97.0441	58.8578	77.5685	88.7515	101.13	60.2776	84.8765	119.765	89.3842	93.2588	89.397
SD=20	Sim65	110.528	84.2143	91.1942	88.1496	86.8433	99.5148	97.5562	61.4448	77.093	71.6511	62.6076	84.0999	109.889	90.0101	85.2434	76.8152
SD=20	Sim66	98.0482	95.6143	96.168	104.131	100.269	100.651	83.6131	81.7539	70.6543	96.2018	96.2231	81.2571	134.119	82.1816	91.4696	99.3808
SD=20	Sim67	78.2953	56.9179	76.076	96.4514	97.5134	110.18	89.9483	70.9629	71.0427	76.8335	97.5165	78.1487	82.9886	74.0606	91.1453	90.8854
SD=20	Sim68	84.6359	105.849	80.5383	110.345	74.8854	77.3712	76.3045	88.0092	84.3587	57.8539	95.2036	94.0566	105.64	101.318	90.589	82.5724
SD=20	Sim69	102.855	90.3422	97.2229	90.9253	104.443	87.1546	70.5555	87.3861	78.028	89.2673	94.3156	105.362	87.956	91.6642	96.9489	110.323
SD=20	Sim70	82.4142	111.556	89.0582	91.1851	81.4543	80.6734	54.3702	94.6117	61.9331	91.3959	98.0474	78.1258	81.5324	83.1031	81.9473	93.8115
SD=20	Sim71	98.5937	109.664	86.0811	102.209	75.4038	79.3686	95.1114	107.092	109.995	76.6209	102.222	75.6402	99.9022	70.2529	47.5581	83.5184
SD=20	Sim72	82.1206	75.3077	84.5594	93.3634	101.069	73.9302	72.4461	71.4326	94.9269	92.6529	95.4565	90.1627	114.677	59.3766	92.2947	82.6554
SD=20	Sim73	58.866	89.1286	53.8453	79.4399	77.7236	62.4115	76.9413	87.5895	70.6973	83.7574	63.2011	75.2738	64.6111	77.0599	79.9073	98.3611
SD=20	Sim74	89.6686	73.9735	58.2625	65.9083	83.906	75.5936	71.4499	84.6612	98.1125	97.5283	89.7474	88.0617	65.672	75.2444	66.9079	99.7792
SD=20	Sim75	69.4001	72.0567	95.9491	71.5036	76.4889	87.9447	57.5137	96.2026	69.0637	58.4881	99.0688	84.2771	104.475	76.9217	92.5902	72.4696
SD=20	Sim76	106.299	69.6708	95.0307	73.931	69.2508	98.9439	80.8575	85.2948	79.6506	94.4874	60.6229	62.6377	73.4753	61.6518	93.8778	75.4604
SD=20	Sim77	96.5236	105.981	84.1348	66.3083	98.3178	112.007	99.9485	98.749	90.3947	70.794	73.3905	69.9629	85.6959	99.4806	113.917	68.1389
SD=20	Sim78	83.2003	89.1126	82.3314	83.4157	108.273	90.7234	51.0944	96.348	69.4999	84.6051	84.8236	56.0225	101.574	77.1367	97.9073	75.4475
SD=20	Sim79	92.9833	71.3892	60.0148	97.417	71.9599	104.959	76.7296	84.8814	105.827	70.497	59.6296	95.8558	96.0086	68.1551	108.556	69.2942
SD=20	Sim80	41.0656	102.196	77.1768	97.1091	82.0652	93.9166	76.0171	96.599	66.1808	78.8152	70.9012	69.5407	96.4923	97.2853	69.2071	74.8019
SD=20	Sim81	79.6249	77.2436	66.0191	109.418	90.3818	76.0883	80.0179	81.3304	81.1554	90.8341	68.1881	80.6676	93.1858	86.6753	76.5328	91.6965
SD=20	Sim82	83.2263	115.177	107.699	107.511	84.3641	104.462	77.7135	51.3779	97.6379	97.6988	86.0716	77.202	95.9369	112.121	92.8768	74.3065
SD=20	Sim83	101.052	103.538	58.899	72.5262	107.383	96.8488	90.0844	90.4028	100.755	87.4018	99.8331	82.759	81.5605	88.7755	102.991	77.5264
SD=20	Sim84	77.0949	78.0776	76.6091	88.8875	82.404	82.4522	73.57	88.4944	101.804	64.8498	73.6119	73.5296	83.5277	92.563	106.323	93.4578
SD=20	Sim85	84.1112	87.6874	96.3889	87.3941	85.2381	74.0924	69.3274	58.0718	90.5643	103.523	81.3566	96.4358	84.4934	83.1283	87.3678	85.4001
SD=20	Sim86	84.233	81.0585	88.4894	106.417	100.518	66.9146	89.6762	96.0089	83.2348	86.1169	80.8835	109.518	78.8571	67.2274	92.5192	84.0928
SD=20	Sim87	95.669	74.1988	73.653	72.9542	107.676	103.277	80.2631	77.6663	82.3502	80.8188	70.3782	84.0159	82.6209	83.629	85.2338	80.4308
SD=20	Sim88	78.863	66.0788	89.731	75.5677	86.2269	70.055	99.705	74.5297	84.0309	84.8495	57.6247	78.3384	95.4024	77.6782	72.7224	84.0309
SD=20	Sim89	68.772	84.8196	100.012	59.8671	81.0903	96.1021	73.9433	89.7191	101.526	75.4107	102.987	61.9741	62.5148	78.6205	89.527	85.1524
SD=20	Sim90	89.2697	84.0627	92.0471	79.0068	103.567	101.364	71.5974	88.7171	102.988	83.4289	111.741	73.1174	97.4216	64.1951	86.7768	78.4262
[truncated: 9 more rows]
