# Supplementary material for: A count-based decision method for target blood pressure achievement in home blood pressure monitoring data interpretation for clinical practices
Source: Sci Rep. 2022 Mar 10;12:3897. doi: 10.1038/s41598-022-04913-9 (PMC8913602; doi:10.1038/s41598-022-04913-9)
Supplement: Supplementary file 3 — Supplementary Information 3. [file 41598_2022_4913_MOESM3_ESM.xlsx]

## Sheet: Boot_SBP_AUC
Result	SD=5	SD=10	SD=15	SD=20
K=16	0.970012	0.948791	0.960202	0.94202
K=16	0.985924	0.958049	0.942577	0.930958
K=16	0.958784	0.951765	0.966061	0.905259
K=16	0.982085	0.931664	0.954235	0.911126
K=16	0.968125	0.960181	0.964976	0.947611
K=16	0.972292	0.97559	0.95078	0.928744
K=16	0.982553	0.958333	0.9678	0.943385
K=16	0.97439	0.966869	0.9546	0.934516
K=16	0.975644	0.949074	0.965952	0.946263
K=16	0.98137	0.964627	0.940821	0.941091
K=16	0.977883	0.957931	0.973906	0.937374
K=16	0.996956	0.946608	0.967677	0.953502
K=16	0.958852	0.899959	0.952929	0.92931
K=16	0.963268	0.922169	0.953031	0.918197
K=16	0.96875	0.925933	0.961818	0.944104
K=16	0.979798	0.91523	0.958604	0.89625
K=16	0.981042	0.913807	0.955528	0.937577
K=16	0.9524	0.931353	0.985222	0.909416
K=16	0.962762	0.983793	0.933497	0.93241
K=16	0.9794	0.956321	0.944242	0.924716
K=16	0.971185	0.95494	0.94101	0.889368
K=16	0.9961	0.95197	0.978365	0.917802
K=16	0.987267	0.973535	0.957933	0.925122
K=16	0.998974	0.923712	0.939503	0.936497
K=16	0.963958	0.962985	0.954782	0.904848
K=16	0.963498	0.96256	0.970101	0.950625
K=16	0.980317	0.956383	0.968542	0.943434
K=16	0.965116	0.9792	0.951425	0.936667
K=16	0.994545	0.96875	0.937375	0.947368
K=16	0.983793	0.95	0.951633	0.948217
K=16	0.980051	0.958383	0.957647	0.921053
K=16	0.998595	0.9356	0.943158	0.937577
K=16	0.99359	0.959394	0.945608	0.936973
K=16	0.96303	0.97806	0.942203	0.922276
K=16	0.985924	0.947716	0.960202	0.931064
K=16	0.968683	0.981961	0.9296	0.948052
K=16	0.976336	0.947379	0.956372	0.910478
K=16	0.988636	0.892083	0.96625	0.956494
K=16	0.970909	0.962941	0.965781	0.934456
K=16	0.972701	0.957183	0.932477	0.939511
K=16	0.95825	0.949138	0.937576	0.809847
K=16	0.961852	0.948687	0.981571	0.933585
K=16	0.960832	0.965932	0.961461	0.907609
K=16	0.967593	0.936098	0.92	0.923838
K=16	0.982572	0.942633	0.950284	0.926416
K=16	0.981322	0.979302	0.956704	0.920628
K=16	0.9698	0.940976	0.932929	0.943838
K=16	0.98752	0.974569	0.9592	0.905844
K=16	0.968889	0.9334	0.951581	0.932075
K=16	0.996279	0.961118	0.9404	0.907793
K=16	0.98164	0.970353	0.925725	0.916901
K=16	0.955729	0.912972	0.971297	0.92657
K=16	0.980157	0.9538	0.941707	0.917177
K=16	0.956372	0.956074	0.959335	0.930909
K=16	0.950622	0.982738	0.978184	0.951096
K=16	0.976667	0.971062	0.932156	0.916868
K=16	0.988595	0.941212	0.954	0.933703
K=16	0.988358	0.954792	0.955763	0.937999
K=16	0.999792	0.932373	0.975724	0.9536
K=16	0.96101	0.972155	0.971354	0.928571
K=16	0.9806	0.935497	0.956566	0.865666
K=16	0.994419	0.936796	0.961985	0.94371
K=16	0.990869	0.941577	0.979928	0.872323
K=16	0.96	0.95512	0.956768	0.937802
K=16	0.964696	0.957732	0.949293	0.942424
K=16	0.990396	0.948326	0.97439	0.970236
K=16	0.967755	0.947776	0.964171	0.903101
K=16	0.957214	0.889375	0.952176	0.913301
K=16	0.986263	0.96875	0.965	0.918719
K=16	0.973131	0.944912	0.931562	0.951908
K=16	0.97798	0.969615	0.958583	0.938022
K=16	0.954304	0.941828	0.930172	0.929287
K=16	0.981844	0.972973	0.9722	0.94
K=16	0.975333	0.90625	0.890451	0.901761
K=16	0.986111	0.956723	0.927484	0.895624
K=16	0.964573	0.966	0.970353	0.889167
K=16	0.960346	0.920673	0.969326	0.942064
K=16	0.956915	0.935065	0.974436	0.92404
K=16	0.976047	0.95495	0.962	0.917778
K=16	0.970171	0.921042	0.958333	0.964673
K=16	0.98615	0.95494	0.92775	0.929802
K=16	0.983186	0.960404	0.97092	0.954916
K=16	0.962436	0.947411	0.933561	0.929145
K=16	0.977172	0.92975	0.938629	0.92086
K=16	0.968283	0.933694	0.963365	0.938151
K=16	0.992774	0.955128	0.969404	0.929346
K=16	0.954434	0.945805	0.974167	0.9506
K=16	0.931353	0.94179	0.946226	0.921469
K=16	0.986111	0.944578	0.945048	0.921266
K=16	0.977582	0.958651	0.959984	0.832708
K=16	0.993189	0.943253	0.967794	0.941188
K=16	0.991087	0.966989	0.975561	0.853865
K=16	0.982844	0.939438	0.940988	0.935417
K=16	0.952264	0.905172	0.972929	0.921665
K=16	0.985833	0.919504	0.9518	0.873377
K=16	0.94582	0.914463	0.970033	0.944822
K=16	0.95653	0.956931	0.966987	0.964986
K=16	0.9696	0.951856	0.955982	0.936997
K=16	0.976461	0.923309	0.950976	0.851693
K=16	0.970029	0.943232	0.957933	0.896759
K=16	0.942995	0.945978	0.961585	0.904992
K=16	0.983297	0.932121	0.939616	0.965688
K=16	0.970289	0.936557	0.946061	0.916465
K=16	0.988711	0.925809	0.965723	0.945513
K=16	0.985777	0.9439	0.949418	0.941918
K=16	0.960069	0.965482	0.978591	0.942377
K=16	0.973112	0.941964	0.967187	0.884236
K=16	0.965312	0.9425	0.915846	0.907062
K=16	0.958934	0.97578	0.943396	0.936923
K=16	0.975556	0.971737	0.949819	0.928896
K=16	0.979125	0.918277	0.981533	0.909054
K=16	0.989899	0.936688	0.978387	0.9562
K=16	0.967127	0.941356	0.944511	0.926745
K=16	0.973112	0.950622	0.969289	0.887597
K=16	0.985859	0.964848	0.975761	0.931253
K=16	0.982772	0.913187	0.945002	0.882292
K=16	0.972906	0.926937	0.962139	0.937577
K=16	0.973956	0.929948	0.9592	0.922824
K=16	0.931562	0.958183	0.932121	0.938424
K=16	0.987195	0.955314	0.956169	0.936782
K=16	0.933857	0.900208	0.982222	0.912281
K=16	0.986944	0.94335	0.961461	0.937172
K=16	0.965894	0.924729	0.980569	0.926971
K=16	0.941505	0.942593	0.980192	0.926011
K=16	0.993798	0.949899	0.950836	0.916157
K=16	0.960728	0.966538	0.952981	0.917268
K=16	0.992797	0.954327	0.963001	0.925796
K=16	0.983994	0.95471	0.959253	0.947516
K=16	0.969228	0.909833	0.947464	0.919034
K=16	0.984292	0.948269	0.938384	0.924762
K=16	0.951892	0.961414	0.928543	0.934286
K=16	0.971591	0.922824	0.926328	0.903761
K=16	0.9752	0.9146	0.955038	0.951952
K=16	0.965097	0.936131	0.971297	0.928397
K=16	0.9864	0.880073	0.9662	0.919779
K=16	0.995556	0.945813	0.967768	0.959394
K=16	0.982553	0.973994	0.9836	0.9254
K=16	0.980469	0.97	0.96855	0.909673
K=16	0.984375	0.942834	0.972902	0.941406
K=16	0.970854	0.9664	0.958049	0.898409
K=16	0.985894	0.950282	0.97459	0.901245
K=16	0.980722	0.936975	0.964143	0.927284
K=16	0.979167	0.941964	0.952925	0.86252
K=16	0.9794	0.949418	0.9684	0.885275
K=16	0.987981	0.935129	0.922276	0.92776
K=16	0.973888	0.963922	0.957126	0.915025
K=16	0.970828	0.960417	0.959736	0.925731
K=16	0.971313	0.919792	0.973832	0.959936
K=16	0.967364	0.950599	0.927885	0.914292
K=16	0.963742	0.929335	0.953125	0.88338
K=16	0.982393	0.971154	0.962785	0.870534
K=16	0.983232	0.934896	0.979099	0.902192
K=16	0.990616	0.957083	0.953502	0.923297
K=16	0.983434	0.94223	0.875351	0.882045
K=16	0.989697	0.947879	0.9778	0.943365
K=16	0.933292	0.942776	0.97476	0.935897
K=16	0.985016	0.953926	0.959608	0.935897
K=16	0.957848	0.973389	0.97792	0.878825
K=16	0.966787	0.937192	0.933974	0.930214
K=16	0.970505	0.917172	0.952324	0.921699
K=16	0.973933	0.943572	0.966546	0.922282
K=16	0.995039	0.952093	0.935471	0.932824
K=16	0.992086	0.912338	0.932292	0.916396
K=16	0.9698	0.956783	0.923369	0.95495
K=16	0.96855	0.936098	0.976515	0.933293
K=16	0.971096	0.956119	0.95825	0.949519
K=16	0.962256	0.935129	0.920645	0.883353
K=16	0.981935	0.968474	0.96256	0.925903
K=16	0.963434	0.9516	0.965186	0.889984
K=16	0.976481	0.960737	0.960346	0.933131
K=16	0.992492	0.957995	0.961039	0.923636
K=16	0.965386	0.931377	0.954304	0.946465
K=16	0.965275	0.967135	0.95798	0.926667
K=16	0.969	0.921539	0.9506	0.8854
K=16	0.980034	0.949519	0.926108	0.893309
K=16	0.987475	0.92653	0.947411	0.933894
K=16	0.975417	0.952917	0.961818	0.936699
K=16	0.982393	0.918586	0.973616	0.958116
K=16	0.998994	0.978141	0.950417	0.912567
K=16	0.947579	0.9	0.949773	0.911458
K=16	0.968788	0.893416	0.975644	0.927917
K=16	0.994288	0.93472	0.967342	0.93472
K=16	0.968996	0.945978	0.942029	0.925809
K=16	0.965252	0.9488	0.941818	0.866379
K=16	0.973098	0.926153	0.956594	0.95002
K=16	0.977476	0.970707	0.961739	0.914654
K=16	0.998595	0.944376	0.950707	0.926358
K=16	0.97596	0.957131	0.967127	0.835373
K=16	0.990596	0.965	0.918968	0.88375
K=16	0.969788	0.851515	0.920625	0.930958
K=16	0.987795	0.978591	0.943195	0.942626
K=16	0.9574	0.9475	0.94391	0.920833
K=16	0.992044	0.950521	0.9524	0.881875
K=16	0.956457	0.942633	0.953581	0.941964
K=16	0.955113	0.936198	0.933774	0.947665
K=16	0.971997	0.956983	0.981884	0.9196
K=16	0.9764	0.916908	0.954343	0.917445
K=16	0.989596	0.961141	0.97561	0.916364
K=16	0.983125	0.944444	0.97491	0.911836
K=16	0.978121	0.959619	0.950505	0.89142
K=16	0.939039	0.909266	0.947849	0.911031
K=16	0.967282	0.904372	0.940476	0.935471
K=16	0.955239	0.884031	0.962649	0.940833
K=16	0.977802	0.904562	0.93336	0.93947
K=16	0.97967	0.945652	0.96875	0.949349
K=16	0.981506	0.972808	0.96375	0.9282
K=16	0.976405	0.927536	0.927	0.93405
K=16	0.981533	0.936108	0.936374	0.878586
K=16	0.989583	0.954097	0.9226	0.939644
K=16	0.972625	0.942377	0.945203	0.88961
K=16	0.975556	0.935367	0.971497	0.929487
K=16	0.975643	0.956387	0.948592	0.951875
K=16	0.964081	0.964448	0.96	0.938101
K=16	0.967071	0.982549	0.962248	0.951111
K=16	0.976768	0.975316	0.9725	0.920849
K=16	0.984216	0.958651	0.961985	0.931445
K=16	0.984375	0.949979	0.963688	0.934295
K=16	0.998542	0.938902	0.956383	0.952925
K=16	0.989704	0.954235	0.955982	0.872501
K=16	0.977057	0.950707	0.943998	0.944662
K=16	0.996989	0.933978	0.927545	0.929329
K=16	0.927484	0.945203	0.958734	0.937984
K=16	0.98125	0.956105	0.931763	0.92477
K=16	0.965706	0.973333	0.987595	0.85548
K=16	0.988358	0.930349	0.981771	0.952873
K=16	0.959384	0.963208	0.941558	0.917668
K=16	0.985118	0.930223	0.955128	0.938607
K=16	0.979537	0.936937	0.928342	0.937083
K=16	0.973524	0.96757	0.960257	0.911
K=16	0.967071	0.934574	0.978924	0.893473
K=16	0.968485	0.94686	0.976768	0.87339
K=16	0.962424	0.940576	0.960606	0.899351
K=16	0.936557	0.939613	0.95825	0.920345
K=16	0.975244	0.936699	0.967147	0.901168
K=16	0.979592	0.936775	0.950221	0.931373
K=16	0.981534	0.914427	0.983022	0.920977
K=16	0.959944	0.953287	0.968584	0.889697
K=16	0.986378	0.954106	0.938101	0.915861
K=16	0.955782	0.966747	0.954167	0.910106
K=16	0.965036	0.916063	0.973789	0.907253
K=16	0.966469	0.976963	0.9775	0.956897
K=16	0.952501	0.956731	0.947779	0.907407
K=16	0.956981	0.969091	0.97491	0.93625
K=16	0.985187	0.930772	0.969788	0.947611
K=16	0.984496	0.944716	0.948485	0.898539
K=16	0.967708	0.939304	0.957332	0.907708
K=16	0.986061	0.936575	0.956768	0.943195
K=16	0.980364	0.935908	0.964035	0.921414
K=16	0.990122	0.96095	0.965909	0.913352
K=16	0.987033	0.941978	0.942912	0.962857
K=16	0.95899	0.967472	0.9446	0.897708
K=16	0.990542	0.949878	0.977965	0.923878
K=16	0.962465	0.927956	0.942577	0.916973
K=16	0.98776	0.930689	0.967593	0.908454
K=16	0.94938	0.963001	0.971698	0.890024
K=16	0.98284	0.951827	0.955918	0.91389
K=16	0.973906	0.948873	0.907407	0.958182
K=16	0.967684	0.928571	0.934295	0.922867
K=16	0.950944	0.975244	0.96949	0.958852
K=16	0.980114	0.942776	0.942577	0.894358
K=16	0.936751	0.941538	0.979768	0.926335
K=16	0.993386	0.937182	0.92437	0.944042
K=16	0.986771	0.949495	0.963768	0.943639
K=16	0.9796	0.974343	0.95118	0.940376
K=16	0.958182	0.954982	0.955182	0.908053
K=16	0.984195	0.915766	0.930029	0.8928
K=16	0.994253	0.941782	0.966787	0.888021
K=16	0.99592	0.954603	0.929549	0.911765
K=16	0.965524	0.912727	0.932427	0.92303
K=16	0.962359	0.941297	0.982085	0.888283
K=16	0.966184	0.927138	0.932573	0.852418
K=16	0.971919	0.972727	0.976	0.903653
K=16	0.981482	0.933939	0.944578	0.920008
K=16	0.980192	0.887071	0.961617	0.967735
K=16	0.965378	0.9606	0.938775	0.879968
K=16	0.974908	0.980808	0.957126	0.938384
K=16	0.988181	0.960136	0.95018	0.890855
K=16	0.97419	0.919375	0.97182	0.844444
K=16	0.963268	0.942857	0.941414	0.921662
K=16	0.989942	0.952727	0.959184	0.939
K=16	0.990303	0.969541	0.954637	0.906197
K=16	0.990833	0.976664	0.961338	0.929146
K=16	0.952046	0.951381	0.939039	0.944199
K=16	0.988325	0.942222	0.940505	0.947706
K=16	0.992559	0.941907	0.948414	0.915152
K=16	0.983944	0.908053	0.96388	0.938611
K=16	0.953125	0.95613	0.982336	0.939891
K=16	0.977172	0.964655	0.962381	0.931891
K=16	0.979537	0.973	0.948568	0.896635
K=16	0.977422	0.9446	0.962233	0.902761
K=16	0.987479	0.936987	0.944378	0.948718
K=16	0.963785	0.908958	0.970008	0.910625
K=16	0.985919	0.978121	0.90625	0.895495
K=16	0.960746	0.885216	0.949017	0.88735
K=16	0.972222	0.969293	0.945119	0.898604
K=16	0.972356	0.968897	0.952027	0.9412
K=16	0.97552	0.962828	0.9568	0.836535
K=16	0.9768	0.9756	0.978391	0.896175
K=16	0.968344	0.9674	0.949275	0.908813
K=16	0.969752	0.978391	0.965877	0.927484
K=16	0.968187	0.979167	0.932357	0.842748
K=16	0.97517	0.901786	0.956566	0.936688
K=16	0.980992	0.969417	0.95618	0.904333
K=16	0.983396	0.948081	0.964472	0.927581
K=16	0.97511	0.93898	0.967665	0.896364
K=16	0.934862	0.928369	0.928744	0.940887
K=16	0.954582	0.914166	0.9636	0.929888
K=16	0.97855	0.974908	0.949612	0.917657
K=16	0.976461	0.930153	0.978865	0.920454
K=16	0.939681	0.952516	0.943492	0.926519
K=16	0.96371	0.948864	0.946458	0.910628
K=16	0.981042	0.943253	0.9614	0.932525
K=16	0.970033	0.9272	0.933776	0.940577
K=16	0.979727	0.920272	0.929546	0.939236
K=16	0.989392	0.916081	0.952313	0.944375
K=16	0.966256	0.947667	0.95936	0.844417
K=16	0.967147	0.910511	0.952666	0.902489
K=16	0.98368	0.920202	0.950707	0.862133
K=16	0.986916	0.967483	0.9664	0.895553
K=16	0.96562	0.90875	0.95012	0.944311
K=16	0.971059	0.946879	0.93438	0.92497
K=16	0.986842	0.952525	0.944512	0.903736
K=16	0.978523	0.934896	0.962941	0.93884
K=16	0.961207	0.977708	0.955582	0.914686
K=16	0.971794	0.92653	0.973888	0.913542
K=16	0.967483	0.951908	0.966546	0.92776
K=16	0.952672	0.938419	0.946631	0.936751
K=16	0.954747	0.941224	0.945019	0.91428
K=16	0.9723	0.969289	0.953	0.939904
K=16	0.968176	0.943778	0.955239	0.907266
K=16	0.974638	0.922722	0.947572	0.918033
K=16	0.97697	0.947572	0.95156	0.940202
K=16	0.984176	0.909221	0.9596	0.912972
K=16	0.986795	0.962785	0.944786	0.852341
K=16	0.971154	0.959565	0.962222	0.897292
K=16	0.99399	0.896135	0.940066	0.911765
K=16	0.97858	0.952525	0.963185	0.918707
K=16	0.986404	0.929888	0.9377	0.919504
K=16	0.9642	0.962865	0.981212	0.911515
K=16	0.973098	0.9776	0.966279	0.894097
K=16	0.976162	0.953333	0.962585	0.914654
K=16	0.959784	0.968387	0.967156	0.95614
K=16	0.961662	0.910707	0.971497	0.966893
K=16	0.967995	0.945002	0.960404	0.945652
K=16	0.979968	0.95613	0.93878	0.896264
K=16	0.984606	0.926136	0.952516	0.913149
K=16	0.995974	0.971042	0.9154	0.88425
K=16	0.985777	0.955974	0.967483	0.939941
K=16	0.95845	0.908687	0.959281	0.918401
K=16	0.983636	0.950428	0.9622	0.936796
K=16	0.931253	0.935345	0.938808	0.913737
K=16	0.997565	0.95512	0.940988	0.925085
K=16	0.96855	0.944605	0.946061	0.949773
K=16	0.9452	0.917005	0.920441	0.906875
K=16	0.937094	0.935789	0.961412	0.916361
K=16	0.960024	0.946006	0.971755	0.950886
K=16	0.9722	0.940341	0.954141	0.95494
K=16	0.973823	0.97933	0.940341	0.89625
K=16	0.979394	0.940025	0.972756	0.851055
K=16	0.965982	0.935897	0.966947	0.948326
K=16	0.984299	0.961141	0.967768	0.92212
K=16	0.981971	0.921396	0.962222	0.925176
K=16	0.955813	0.966787	0.946179	0.914091
K=16	0.976664	0.952181	0.94696	0.933575
K=16	0.983434	0.959565	0.96328	0.897
K=16	0.970388	0.966967	0.930963	0.930008
K=16	0.9594	0.952323	0.938702	0.941044
K=16	0.969293	0.969007	0.974754	0.922743
K=16	0.924113	0.952429	0.928571	0.92918
K=16	0.988964	0.946179	0.964186	0.943035
K=16	0.977456	0.951094	0.974307	0.912747
K=16	0.965982	0.951626	0.96256	0.934524
K=16	0.994179	0.90747	0.953325	0.891677
K=16	0.964775	0.9556	0.931965	0.947455
K=16	0.984344	0.918809	0.954782	0.867405
K=16	0.987419	0.953633	0.990986	0.903941
K=16	0.971571	0.932833	0.951723	0.883213
K=16	0.923287	0.906865	0.958583	0.895522
K=16	0.978723	0.922292	0.966869	0.92
K=16	0.963838	0.967159	0.917874	0.902626
K=16	0.962222	0.94404	0.925454	0.918425
K=16	0.987195	0.9652	0.976963	0.939024
K=16	0.971	0.970293	0.951704	0.921168
K=16	0.987319	0.918182	0.961397	0.895399
K=16	0.980296	0.926263	0.927338	0.923725
K=16	0.983636	0.944242	0.971236	0.911946
K=16	0.96274	0.956575	0.96254	0.906062
K=16	0.968596	0.937703	0.952581	0.88
K=16	0.973758	0.940606	0.939382	0.937174
K=16	0.994598	0.962359	0.963285	0.9452
K=16	0.969551	0.921699	0.955966	0.901009
K=16	0.964386	0.944978	0.979375	0.9552
K=16	0.962139	0.970753	0.921769	0.955529
K=16	0.986128	0.971354	0.956752	0.938629
K=16	0.983838	0.958744	0.944444	0.874348
K=16	0.951426	0.896611	0.983193	0.903917
K=16	0.96274	0.943588	0.976716	0.95596
K=16	0.95716	0.935174	0.96387	0.875801
K=16	0.929549	0.922414	0.947	0.945854
K=16	0.982048	0.896158	0.977991	0.896201
K=16	0.975311	0.933575	0.990303	0.906875
K=16	0.979622	0.926136	0.983636	0.924929
K=16	0.982793	0.95082	0.955729	0.965386
K=16	0.985252	0.941964	0.954182	0.8866
K=16	0.984498	0.961648	0.941577	0.905985
K=16	0.958807	0.953493	0.985577	0.888889
K=16	0.9746	0.958867	0.981333	0.90138
K=16	0.963067	0.928542	0.955152	0.904557
K=16	0.949878	0.931377	0.9206	0.863433
K=16	0.957386	0.923913	0.951425	0.927135
K=16	0.928601	0.93676	0.957783	0.916596
K=16	0.966667	0.932061	0.964286	0.958792
K=16	0.97583	0.885851	0.953559	0.942939
K=16	0.974576	0.911465	0.967329	0.911111
K=16	0.986762	0.964286	0.984098	0.913771
K=16	0.998333	0.898838	0.972047	0.871795
K=16	0.965545	0.962222	0.968149	0.875556
K=16	0.972292	0.97625	0.957576	0.950321
K=16	0.952792	0.9298	0.914546	0.920208
K=16	0.932971	0.900041	0.952792	0.932525
K=16	0.966465	0.961818	0.974704	0.890807
K=16	0.987957	0.956983	0.947917	0.930972
K=16	0.971389	0.960521	0.941918	0.938312
K=16	0.977917	0.956494	0.941426	0.911352
K=16	0.978391	0.92457	0.9296	0.957555
K=16	0.97559	0.94724	0.96101	0.867605
K=16	0.958384	0.914117	0.980592	0.887602
K=16	0.9694	0.952724	0.967794	0.935484
K=16	0.97246	0.956897	0.930958	0.925796
K=16	0.962668	0.882596	0.949119	0.902897
K=16	0.957834	0.905753	0.908687	0.939616
K=16	0.948928	0.951288	0.955717	0.888821
K=16	0.986443	0.952381	0.95156	0.935484
K=16	0.981414	0.922083	0.970443	0.942377
K=16	0.953937	0.900241	0.960314	0.88369
K=16	0.973631	0.974432	0.956731	0.946579
K=16	0.990365	0.942107	0.96101	0.94582
K=16	0.989872	0.970786	0.908485	0.928945
K=16	0.958049	0.935152	0.900765	0.902626
K=16	0.934696	0.974359	0.97491	0.938455
K=16	0.959053	0.977519	0.944178	0.95184
K=16	0.979192	0.960908	0.9628	0.905191
K=16	0.971354	0.95308	0.974159	0.958651
K=16	0.992388	0.942828	0.947716	0.900965
K=16	0.96274	0.959561	0.9546	0.949097
K=16	0.948661	0.919802	0.923878	0.8938
K=16	0.986995	0.917468	0.969289	0.96757
K=16	0.97496	0.935697	0.965208	0.908685
K=16	0.96388	0.921266	0.960384	0.8476
K=16	0.981593	0.895354	0.942308	0.933494
K=16	0.968687	0.939181	0.973131	0.967292
K=16	0.969828	0.91244	0.977564	0.913998
K=16	0.964241	0.964143	0.918367	0.906053
K=16	0.995798	0.935769	0.945859	0.926134
K=16	0.960314	0.958616	0.954637	0.943377
K=16	0.973939	0.959454	0.958384	0.92477
K=16	0.985794	0.920568	0.957374	0.918925
K=16	0.958182	0.946756	0.985194	0.913333
K=16	0.967548	0.95613	0.960859	0.866174
K=16	0.988559	0.944176	0.964744	0.941377
K=16	0.976461	0.949359	0.963956	0.93599
K=16	0.971589	0.90847	0.964586	0.943109
K=16	0.981935	0.946979	0.967593	0.91174
K=16	0.97707	0.964894	0.94	0.927377
K=16	0.985577	0.914729	0.977301	0.882093
K=16	0.971216	0.955864	0.955929	0.925382
K=16	0.988527	0.915	0.958604	0.879394
K=16	0.959596	0.947849	0.942577	0.914414
K=16	0.940705	0.943841	0.9548	0.964504
K=16	0.975713	0.962963	0.944847	0.929516
K=16	0.97437	0.956548	0.968081	0.953531
K=16	0.97806	0.956723	0.967282	0.917789
K=16	0.996139	0.956931	0.938502	0.91
K=16	0.988381	0.9167	0.955918	0.904299
K=16	0.971889	0.945532	0.940385	0.909018
K=16	0.977172	0.944712	0.956494	0.939019
K=16	0.960808	0.966186	0.942977	0.948816
K=16	0.978084	0.978391	0.938392	0.927684
K=16	0.973357	0.970713	0.957327	0.930958
K=16	0.9706	0.941176	0.939904	0.9374
K=16	0.978979	0.96126	0.972789	0.900965
K=16	0.997993	0.934659	0.955529	0.973276
K=16	0.959784	0.923092	0.970188	0.903612
K=16	0.977273	0.95614	0.946314	0.912292
K=16	0.996999	0.941558	0.973229	0.902439
K=16	0.9802	0.932367	0.9526	0.875616
K=16	0.987903	0.917993	0.928087	0.889002
K=16	0.964071	0.922877	0.968487	0.92653
K=16	0.977057	0.981971	0.9618	0.963271
K=16	0.957083	0.937778	0.971189	0.9188
K=16	0.97806	0.972716	0.969899	0.944578
K=16	0.974959	0.965275	0.936973	0.8376
K=16	0.991511	0.943464	0.9272	0.944378
K=16	0.982976	0.940705	0.9454	0.917657
K=16	0.986701	0.966586	0.923077	0.964912
K=16	0.961968	0.941907	0.892036	0.856527
K=16	0.965378	0.901973	0.963838	0.915625
K=16	0.9664	0.963365	0.929293	0.949979
K=16	0.985288	0.966881	0.939976	0.918105
K=16	0.975446	0.945883	0.970753	0.914117
K=16	0.972389	0.946348	0.950886	0.882153
K=16	0.969289	0.96	0.936149	0.917778
K=16	0.9478	0.924261	0.963585	0.864177
K=16	0.9826	0.96202	0.962762	0.918019
K=16	0.965946	0.976716	0.955782	0.909474
K=16	0.959541	0.949067	0.92577	0.927557
K=16	0.97246	0.960784	0.959281	0.903561
K=16	0.9772	0.982336	0.951122	0.917869
K=16	0.95034	0.943841	0.9508	0.91108
K=16	0.966747	0.94847	0.979567	0.935625
K=16	0.9514	0.954509	0.962359	0.925599
K=16	0.974548	0.93263	0.981737	0.949619
K=16	0.98303	0.958182	0.966546	0.92492
K=16	0.957983	0.970029	0.971848	0.96558
K=16	0.98266	0.96404	0.97	0.906667
K=16	0.964083	0.933036	0.970012	0.93277
K=16	0.967348	0.931562	0.93597	0.922026
K=16	0.9892	0.936298	0.951355	0.894329
K=16	0.963585	0.939121	0.9692	0.928333
K=16	0.987595	0.944167	0.965177	0.940887
K=16	0.985794	0.958661	0.897359	0.958384
K=16	0.988181	0.956372	0.947665	0.928161
K=16	0.970779	0.960796	0.944378	0.954235
K=16	0.978297	0.961385	0.959936	0.951244
K=16	0.973956	0.912861	0.965	0.939296
K=16	0.985516	0.916465	0.958583	0.88722
K=16	0.983272	0.971388	0.959454	0.929952
K=16	0.963742	0.936371	0.943434	0.93149
K=16	0.966987	0.963768	0.958333	0.895936
K=16	0.984544	0.895625	0.974307	0.9264
K=16	0.972389	0.93129	0.960458	0.915435
K=16	0.96875	0.936891	0.89723	0.911667
K=16	0.967938	0.970505	0.959535	0.947611
K=16	0.987981	0.929966	0.953818	0.92517
K=16	0.966544	0.952581	0.971717	0.938802
K=16	0.947464	0.961968	0.952922	0.922003
K=16	0.989305	0.967033	0.970443	0.924964
K=16	0.977118	0.960346	0.95263	0.934216
K=16	0.947018	0.950393	0.957647	0.936667
K=16	0.98303	0.954792	0.939613	0.9308
K=16	0.988124	0.915323	0.975575	0.921396
K=16	0.960346	0.893229	0.939904	0.950909
K=16	0.9572	0.962381	0.957995	0.970238
K=16	0.965476	0.979326	0.946407	0.913505
K=16	0.976515	0.96753	0.98053	0.938976
K=16	0.96106	0.953735	0.943798	0.941918
K=16	0.9984	0.986194	0.957007	0.951448
K=16	0.982954	0.959184	0.947115	0.945854
K=16	0.970365	0.959213	0.96303	0.905861
K=16	0.9662	0.9628	0.933573	0.9208
K=16	0.987995	0.946834	0.945513	0.961985
K=16	0.957529	0.957131	0.956372	0.958333
K=16	0.971667	0.978586	0.950684	0.937094
K=16	0.968176	0.992351	0.970188	0.896104
K=16	0.97499	0.913131	0.945617	0.929287
K=16	0.972085	0.967342	0.932971	0.940705
K=16	0.969822	0.989145	0.950221	0.940988
K=16	0.953737	0.964444	0.923324	0.924261
K=16	0.983169	0.963828	0.957848	0.91678
K=16	0.985777	0.959154	0.95825	0.955732
K=16	0.974026	0.933373	0.97625	0.890606
K=16	0.971848	0.940798	0.969967	0.933978
K=16	0.980731	0.959053	0.9692	0.900641
K=16	0.953125	0.933239	0.976391	0.890756
K=16	0.974559	0.964448	0.974839	0.8712
K=16	0.976716	0.928193	0.925121	0.932218
K=16	0.978261	0.962464	0.970152	0.889756
K=16	0.962222	0.955767	0.937703	0.871377
K=16	0.970443	0.956042	0.919375	0.933125
K=16	0.997584	0.917708	0.971354	0.92776
K=16	0.968344	0.9688	0.929598	0.93336
K=16	0.9436	0.964271	0.990196	0.906656
K=16	0.978784	0.947812	0.963969	0.902644
K=16	0.966587	0.976744	0.944792	0.9652
K=16	0.972923	0.928193	0.971618	0.910657
K=16	0.992695	0.940476	0.930556	0.908763
K=16	0.972664	0.947443	0.930029	0.932727
K=16	0.950893	0.952708	0.937975	0.950944
K=16	0.964786	0.930963	0.947716	0.945008
K=16	0.988195	0.972021	0.954782	0.90566
K=16	0.962668	0.935944	0.960337	0.956075
K=16	0.991042	0.940433	0.97496	0.942881
K=16	0.982336	0.97182	0.941907	0.932709
K=16	0.991174	0.937164	0.940576	0.927963
K=16	0.984194	0.957923	0.961353	0.95246
K=16	0.960784	0.929392	0.97559	0.902626
K=16	0.967768	0.95556	0.926683	0.9225
K=16	0.953692	0.941191	0.918367	0.956494
K=16	0.976449	0.92457	0.973072	0.874188
K=16	0.986995	0.951094	0.964143	0.900442
K=16	0.976515	0.921517	0.958383	0.89532
K=16	0.979414	0.956667	0.984984	0.910229
K=16	0.969019	0.930178	0.948918	0.922922
K=16	0.962033	0.936098	0.978765	0.955353
K=16	0.956691	0.964775	0.933857	0.938177
K=16	0.964504	0.963333	0.974	0.887796
K=16	0.956074	0.959227	0.974149	0.947247
K=16	0.991997	0.967708	0.911481	0.930624
K=16	0.977476	0.935568	0.973	0.949495
K=16	0.941092	0.95614	0.981971	0.944308
K=16	0.972902	0.95018	0.965986	0.953896
K=16	0.979613	0.946206	0.97182	0.896175
K=16	0.970713	0.96804	0.947044	0.958651
K=16	0.935185	0.891026	0.960908	0.921064
K=16	0.970779	0.916567	0.964096	0.890805
K=16	0.943978	0.941249	0.974163	0.910024
K=16	0.987957	0.957131	0.987995	0.925714
K=16	0.957332	0.950284	0.949119	0.9194
K=16	0.984299	0.946314	0.931373	0.908454
K=16	0.984702	0.953125	0.957126	0.917503
K=16	0.967147	0.938579	0.949519	0.904657
K=16	0.944878	0.915	0.975724	0.8888
K=16	0.96254	0.955353	0.966787	0.904919
K=16	0.953125	0.91899	0.94847	0.936149
K=16	0.964944	0.97459	0.9396	0.899633
K=16	0.977708	0.957007	0.985994	0.948352
K=16	0.952666	0.975417	0.937778	0.925833
K=16	0.974792	0.915966	0.925745	0.946429
K=16	0.967755	0.936508	0.941091	0.907051
K=16	0.958784	0.94721	0.952876	0.968283
K=16	0.978261	0.95038	0.930624	0.902222
K=16	0.987475	0.963969	0.956731	0.930556
K=16	0.976806	0.936544	0.9284	0.813546
K=16	0.993156	0.975644	0.967147	0.956575
K=16	0.973011	0.9264	0.973589	0.924718
K=16	0.989011	0.9278	0.94898	0.915295
K=16	0.971111	0.960784	0.924792	0.937172
K=16	0.989375	0.926465	0.95544	0.924349
K=16	0.973157	0.974	0.967692	0.895698
K=16	0.961036	0.940583	0.961538	0.95034
K=16	0.979167	0.943985	0.954728	0.897832
K=16	0.952181	0.950721	0.959936	0.955782
K=16	0.978565	0.948816	0.973705	0.940419
K=16	0.972323	0.921095	0.915435	0.941707
K=16	0.978693	0.952929	0.967282	0.877029
K=16	0.978022	0.964083	0.901673	0.924375
K=16	0.932432	0.967127	0.959584	0.932959
K=16	0.981793	0.909018	0.935974	0.933701
K=16	0.973589	0.959857	0.948052	0.959487
K=16	0.980128	0.902424	0.977968	0.955966
K=16	0.975985	0.942432	0.950739	0.920237
K=16	0.95899	0.964286	0.986465	0.9208
K=16	0.966928	0.940776	0.953581	0.942909
K=16	0.98303	0.9694	0.951781	0.9232
K=16	0.955841	0.921042	0.938976	0.876409
K=16	0.989899	0.907265	0.97491	0.896162
K=16	0.942834	0.93565	0.968801	0.9439
K=16	0.969735	0.91596	0.953301	0.932173
K=16	0.971627	0.963688	0.967329	0.896104
K=16	0.994084	0.963185	0.971755	0.921053
K=16	0.970208	0.962056	0.964143	0.927911
K=16	0.95225	0.952027	0.970695	0.919562
K=16	0.976449	0.900161	0.939303	0.944578
K=16	0.960488	0.917167	0.955382	0.930572
K=16	0.983139	0.956671	0.97459	0.948579
K=16	0.987196	0.9568	0.973705	0.887987
K=16	0.961538	0.941022	0.946608	0.910964
K=16	0.995	0.972656	0.942977	0.937577
K=16	0.978788	0.904325	0.963141	0.960908
K=16	0.968485	0.903382	0.962941	0.921212
K=16	0.991102	0.927941	0.957383	0.926002
K=16	0.971675	0.9266	0.975361	0.900579
K=16	0.977391	0.970833	0.930372	0.914663
K=16	0.967972	0.943577	0.9628	0.947044
K=16	0.970854	0.947572	0.959192	0.960202
K=16	0.986667	0.937818	0.915556	0.914375
K=16	0.987923	0.899394	0.962828	0.943237
K=16	0.979911	0.934729	0.973333	0.930556
K=16	0.946206	0.951827	0.96855	0.932773
K=16	0.95587	0.950632	0.942085	0.885761
K=16	0.98358	0.921699	0.970388	0.950428
K=16	0.958734	0.934949	0.965745	0.903046
K=16	0.930288	0.934253	0.922676	0.946579
K=16	0.966079	0.931207	0.9692	0.871528
K=16	0.972589	0.916081	0.971789	0.924056
K=16	0.988012	0.953239	0.969203	0.881414
K=16	0.967755	0.980777	0.951425	0.912641
K=16	0.935385	0.94237	0.974838	0.924968
K=16	0.983974	0.945034	0.957933	0.944595
K=16	0.97476	0.901667	0.9662	0.913165
K=16	0.982553	0.930815	0.951717	0.909673
K=16	0.987273	0.9592	0.914204	0.879105
K=16	0.9934	0.977254	0.962917	0.938013
K=16	0.949	0.969231	0.9531	0.924444
K=16	0.976763	0.934574	0.945713	0.905417
K=16	0.966136	0.952228	0.9592	0.96562
K=16	0.978788	0.954308	0.933159	0.921517
K=16	0.986248	0.962033	0.947164	0.948718
K=16	0.979537	0.96274	0.985577	0.935574
K=16	0.99026	0.95587	0.945253	0.907065
K=16	0.989651	0.960808	0.9568	0.939303
K=16	0.992898	0.967329	0.909164	0.969156
K=16	0.942577	0.981938	0.958183	0.944848
K=16	0.975196	0.949167	0.965345	0.937094
K=16	0.991511	0.961444	0.945978	0.947061
K=16	0.989	0.929372	0.934141	0.915272
K=16	0.965386	0.900442	0.956783	0.89881
K=16	0.949167	0.956691	0.964862	0.841831
K=16	0.979124	0.948796	0.977364	0.924968
K=16	0.970236	0.925253	0.962465	0.925949
K=16	0.985629	0.955729	0.967475	0.924236
K=16	0.992727	0.954382	0.944912	0.923501
K=16	0.969188	0.914167	0.957126	0.9056
K=16	0.9808	0.961184	0.967475	0.926108
K=16	0.965982	0.918788	0.930643	0.897988
K=16	0.9804	0.947457	0.978766	0.923309
K=16	0.944646	0.953181	0.971618	0.94371
K=16	0.955353	0.967987	0.9444	0.93555
K=16	0.966748	0.939394	0.938375	0.923525
K=16	0.9426	0.942	0.969551	0.930172
K=16	0.957933	0.942577	0.9618	0.945604
K=16	0.994318	0.9375	0.978333	0.90989
K=16	0.988996	0.955782	0.943145	0.928771
K=16	0.961554	0.964822	0.973389	0.933444
K=16	0.984976	0.959253	0.966787	0.892757
K=16	0.975	0.951489	0.9282	0.880457
K=16	0.985194	0.94	0.98674	0.933505
K=16	0.957589	0.925541	0.931152	0.866875
K=16	0.966543	0.949418	0.962785	0.954035
K=16	0.978723	0.904046	0.953552	0.923324
K=16	0.9326	0.965454	0.976461	0.9525
K=16	0.966881	0.957126	0.981737	0.880234
K=16	0.960314	0.958333	0.969788	0.944444
K=16	0.948414	0.958596	0.94958	0.9114
K=16	0.975913	0.936576	0.9228	0.936098
K=16	0.967483	0.963976	0.981333	0.943572
K=16	0.931615	0.940885	0.94186	0.938579
K=16	0.989161	0.949583	0.908201	0.94391
K=16	0.99388	0.932166	0.961585	0.905438
K=16	0.970012	0.935687	0.924679	0.955729
K=16	0.9723	0.926061	0.948013	0.919568
K=16	0.97144	0.957732	0.962379	0.867507
K=16	0.965993	0.940153	0.953726	0.937781
K=16	0.952381	0.924968	0.910308	0.946144
K=16	0.971515	0.967083	0.957848	0.88
K=16	0.916364	0.886061	0.94	0.930433
K=16	0.994565	0.946263	0.963268	0.8914
K=16	0.977791	0.946407	0.940419	0.949678
K=16	0.985657	0.948864	0.95038	0.938808
K=16	0.978766	0.9614	0.9474	0.934934
K=16	0.971189	0.942708	0.965051	0.938818
K=16	0.976791	0.937991	0.949217	0.958049
K=16	0.958583	0.9425	0.959394	0.937901
K=16	0.965909	0.974548	0.948864	0.930624
K=16	0.985325	0.93901	0.955529	0.906162
K=16	0.979269	0.95008	0.931855	0.919568
K=16	0.984501	0.966346	0.959335	0.91405
K=16	0.958401	0.877917	0.947115	0.938921
K=16	0.990505	0.969606	0.971015	0.925781
K=16	0.924056	0.965074	0.96875	0.95613
K=16	0.981616	0.946061	0.974436	0.885216
K=16	0.98303	0.978992	0.974235	0.916166
K=16	0.967135	0.969417	0.966279	0.945208
K=16	0.98194	0.967787	0.988595	0.95512
K=16	0.964386	0.945048	0.945403	0.923333
K=16	0.965345	0.91862	0.96634	0.939529
K=16	0.966881	0.958588	0.933978	0.909622
K=16	0.985252	0.929037	0.97182	0.907879
K=16	0.987292	0.954747	0.954637	0.926002
K=16	0.991186	0.95544	0.983742	0.915179
K=16	0.983272	0.935174	0.971589	0.948779
K=16	0.983066	0.932203	0.962662	0.946732
K=16	0.986995	0.947646	0.970494	0.905141
K=16	0.970293	0.938177	0.971297	0.944725
K=16	0.983092	0.956931	0.967949	0.919109
K=16	0.979885	0.935367	0.955147	0.914366
K=16	0.976948	0.965495	0.944712	0.926929
K=16	0.97092	0.976643	0.938801	0.90926
K=16	0.96404	0.951717	0.934966	0.897524
K=16	0.989813	0.947849	0.9744	0.910914
K=16	0.967564	0.929187	0.968547	0.875556
K=16	0.983742	0.927785	0.955982	0.957583
K=16	0.932075	0.947516	0.942473	0.921455
K=16	0.966947	0.9723	0.9372	0.929215
K=16	0.966308	0.957246	0.947912	0.932708
K=16	0.984946	0.933573	0.954637	0.902248
K=16	0.929754	0.95901	0.973157	0.928571
K=16	0.962359	0.966465	0.943639	0.924142
K=16	0.971389	0.940016	0.957327	0.921388
K=16	0.980073	0.978391	0.9592	0.937099
K=16	0.967949	0.95206	0.973906	0.923093
K=16	0.973705	0.975443	0.962385	0.899375
K=16	0.961445	0.940586	0.941777	0.886263
K=16	0.950836	0.930505	0.953432	0.917302
K=16	0.943572	0.914773	0.94721	0.876208
K=16	0.97309	0.957512	0.947179	0.856385
K=16	0.94492	0.925253	0.982572	0.908457
K=16	0.989045	0.963385	0.94918	0.9326
K=16	0.971059	0.966469	0.971755	0.887155
K=16	0.970612	0.929899	0.973939	0.917468
K=16	0.9722	0.918182	0.950487	0.931239
K=16	0.977679	0.945513	0.938502	0.93489
K=16	0.9925	0.923812	0.931457	0.876768
K=16	0.97561	0.976917	0.933762	0.912893
K=16	0.951191	0.957343	0.974159	0.905746
K=16	0.966479	0.920692	0.924848	0.8925
K=16	0.970101	0.954982	0.969091	0.954436
K=16	0.979798	0.95432	0.974908	0.930829
K=16	0.98674	0.928366	0.95825	0.904255
K=16	0.95633	0.941176	0.958604	0.95564
K=16	0.944992	0.916384	0.941818	0.894125
K=16	0.979192	0.944805	0.969588	0.912917
K=16	0.971185	0.911126	0.9784	0.937802
K=16	0.94371	0.953031	0.959984	0.886465
K=16	0.966586	0.93438	0.944646	0.92
K=16	0.987475	0.97495	0.975575	0.867955
K=16	0.942777	0.927684	0.977053	0.868227
K=16	0.980008	0.89625	0.9362	0.922222
K=16	0.989042	0.929598	0.946579	0.924792
K=16	0.967159	0.97188	0.951425	0.916384
K=16	0.9714	0.945454	0.953958	0.945417
K=16	0.972021	0.932373	0.9628	0.935556
K=16	0.957923	0.955729	0.947979	0.909495
K=16	0.959674	0.943182	0.930195	0.882753
K=16	0.984194	0.946052	0.95613	0.866949
K=16	0.981715	0.90625	0.953939	0.943438
K=16	0.978038	0.97419	0.972727	0.923678
K=16	0.964386	0.963768	0.984375	0.935367
K=16	0.963585	0.949217	0.934109	0.945913
K=16	0.968992	0.955255	0.92637	0.854742
K=16	0.965517	0.956691	0.968286	0.972121
K=16	0.990585	0.920692	0.952093	0.909564
K=16	0.968375	0.967348	0.958734	0.95166
K=16	0.942777	0.902801	0.944185	0.909964
K=16	0.994286	0.968687	0.932973	0.915953
K=16	0.977564	0.967483	0.965545	0.95012
K=16	0.982292	0.948779	0.912708	0.93945
K=16	0.965208	0.971997	0.935096	0.94371
K=16	0.965503	0.964286	0.943309	0.953325
K=16	0.97968	0.954375	0.9384	0.911042
K=16	0.980317	0.917115	0.944042	0.901245
K=16	0.963768	0.916596	0.964504	0.950224
K=16	0.978462	0.96234	0.947379	0.925698
K=16	0.95145	0.88909	0.930101	0.923936
K=16	0.986752	0.958333	0.962866	0.918809
K=16	0.989245	0.961585	0.940821	0.861715
K=16	0.963465	0.966544	0.957772	0.896858
K=16	0.960547	0.958542	0.939211	0.925532
K=16	0.978353	0.966667	0.929187	0.961412
K=16	0.969167	0.988929	0.897185	0.891234
K=16	0.9914	0.957386	0.935152	0.901199
K=16	0.991585	0.95421	0.953882	0.927151
K=16	0.989275	0.922867	0.920692	0.9172
K=16	0.975446	0.9372	0.96106	0.912686
K=16	0.973214	0.895825	0.924848	0.84682
K=16	0.976667	0.915668	0.94492	0.929417
K=16	0.97552	0.955239	0.961604	0.911965
K=16	0.990767	0.916141	0.934364	0.94978
K=16	0.95845	0.97033	0.953734	0.893758
K=16	0.994213	0.950208	0.947779	0.906563
K=16	0.951448	0.905549	0.929572	0.915056
K=16	0.986194	0.954916	0.978788	0.934684
K=16	0.967794	0.964986	0.948255	0.872349
K=16	0.989183	0.942508	0.943798	0.945617
K=16	0.968141	0.970353	0.963054	0.965952
K=16	0.945532	0.942377	0.952206	0.922277
K=16	0.949217	0.885146	0.944042	0.864953
K=16	0.961617	0.928276	0.969752	0.882
K=16	0.983897	0.955385	0.9668	0.888209
K=16	0.965275	0.9102	0.960739	0.918019
K=16	0.966787	0.955918	0.966385	0.948255
K=16	0.950123	0.963333	0.956183	0.923522
K=16	0.973103	0.952672	0.964242	0.915665
K=16	0.942828	0.95058	0.972902	0.941022
K=16	0.978391	0.970052	0.9436	0.918182
K=16	0.984401	0.899038	0.973417	0.909856
K=16	0.982772	0.935897	0.9326	0.947779
K=16	0.991383	0.934179	0.949275	0.934974
K=16	0.944601	0.979367	0.9436	0.96388
K=16	0.969105	0.944646	0.964143	0.916701
K=16	0.983969	0.913849	0.941092	0.931789
K=16	0.978992	0.958792	0.939167	0.913044
K=16	0.977263	0.921266	0.978503	0.897083
K=16	0.9844	0.946672	0.964271	0.891506
K=16	0.97437	0.934934	0.983878	0.904657
K=16	0.964775	0.968054	0.961956	0.9275
K=16	0.983077	0.934635	0.956162	0.907636
K=16	0.993778	0.933293	0.951717	0.875805
K=16	0.9736	0.894066	0.963067	0.930354
K=16	0.9975	0.968391	0.983541	0.95432
K=16	0.961985	0.951581	0.980925	0.928774
K=16	0.96945	0.938575	0.937099	0.893958
K=16	0.975604	0.924242	0.964472	0.930223
K=16	0.979125	0.9612	0.978693	0.889
K=16	0.969388	0.950625	0.953926	0.907563
K=16	0.991071	0.944912	0.957364	0.927484
K=16	0.964786	0.944778	0.906042	0.90056
K=16	0.978243	0.928342	0.93986	0.90191
K=16	0.986552	0.966793	0.966989	0.885149
K=16	0.95018	0.972701	0.933542	0.907813
K=16	0.972323	0.956486	0.979823	0.886373
K=16	0.980824	0.964573	0.954235	0.88711
K=16	0.971264	0.945008	0.966587	0.963875
K=16	0.992434	0.930287	0.962359	0.914792
K=16	0.989389	0.928366	0.962056	0.940789
K=16	0.980519	0.94686	0.954728	0.921042
K=16	0.974838	0.965107	0.976791	0.920977
K=16	0.980114	0.957374	0.956924	0.951781
K=16	0.97619	0.98789	0.92303	0.908868
K=16	0.93263	0.955023	0.966387	0.910241
K=16	0.960749	0.924718	0.975758	0.906161
K=16	0.953098	0.966465	0.968889	0.903325
K=16	0.979744	0.975556	0.946915	0.9062
K=16	0.986129	0.85114	0.973737	0.954728
K=16	0.973616	0.928571	0.9736	0.942222
K=16	0.967768	0.9576	0.942677	0.948081
K=16	0.954235	0.953381	0.948276	0.95625
K=16	0.959184	0.9694	0.932203	0.931373
K=16	0.9756	0.9352	0.971589	0.883782
K=16	0.982346	0.914091	0.934564	0.920422
K=16	0.928542	0.962233	0.923093	0.898925
K=16	0.98097	0.971216	0.962292	0.927484
K=16	0.979408	0.95618	0.969293	0.87776
K=16	0.970576	0.961852	0.969562	0.959798
K=16	0.984911	0.934516	0.964143	0.892323
K=16	0.961444	0.969892	0.964573	0.95018
K=16	0.988839	0.961372	0.951875	0.949495
K=16	0.954434	0.947086	0.974959	0.940887
K=16	0.97375	0.952228	0.966989	0.9444
K=16	0.981732	0.905235	0.961353	0.90227
K=16	0.958182	0.967794	0.935185	0.918401
K=16	0.949269	0.948864	0.940885	0.933093
K=16	0.930136	0.94303	0.969752	0.910241
K=16	0.945639	0.975644	0.946465	0.917567
K=16	0.970612	0.907475	0.951626	0.907206
K=16	0.991274	0.971667	0.963474	0.894219
K=16	0.952046	0.931891	0.962385	0.921212
K=16	0.961959	0.943577	0.97479	0.956548
K=16	0.988325	0.946256	0.953381	0.936891
K=16	0.969105	0.974141	0.947579	0.93277
K=16	0.988095	0.942577	0.904447	0.939576
K=16	0.984745	0.93625	0.969	0.933701
K=16	0.972902	0.958937	0.946834	0.854771
K=16	0.983636	0.939192	0.954509	0.953284
K=16	0.988195	0.958384	0.972527	0.90076
K=16	0.995866	0.934456	0.967794	0.924517
K=16	0.983636	0.9802	0.969792	0.932292
K=16	0.944725	0.91276	0.959655	0.911078
K=16	0.984	0.955782	0.935974	0.915
K=16	0.937611	0.966078	0.955515	0.924079
K=16	0.981	0.97806	0.953131	0.872055
K=16	0.970828	0.956768	0.968788	0.929888
K=16	0.989362	0.964673	0.931373	0.913199
K=16	0.98781	0.954637	0.946052	0.889603
K=16	0.970788	0.949269	0.962666	0.901953
K=16	0.977576	0.983297	0.935497	0.960836
K=16	0.9722	0.96668	0.9424	0.906569
K=16	0.951765	0.954235	0.976763	0.938182
K=16	0.982336	0.937808	0.954023	0.909277
K=16	0.950123	0.95033	0.960337	0.900417
K=16	0.969808	0.937579	0.967748	0.958788
K=16	0.9642	0.957307	0.962385	0.900785
K=16	0.973157	0.952123	0.962158	0.943035
K=16	0.971297	0.927273	0.959074	0.922521
K=16	0.9706	0.944512	0.98194	0.958996
K=16	0.984976	0.939596	0.957834	0.944308
K=16	0.979367	0.924729	0.944812	0.9175
K=16	0.968789	0.895223	0.951626	0.945845
K=16	0.95653	0.924067	0.988636	0.921317
K=16	0.955729	0.961985	0.949678	0.909876
K=16	0.930833	0.957532	0.940104	0.896141
K=16	0.95008	0.962785	0.984394	0.907912
K=16	0.966146	0.924466	0.9508	0.935097
K=16	0.967794	0.950534	0.964343	0.931931
K=16	0.990785	0.957	0.953982	0.886084
K=16	0.965932	0.930972	0.9522	0.883517
K=16	0.975196	0.939616	0.95596	0.942222
K=16	0.980778	0.936782	0.962872	0.926875
K=16	0.976671	0.93514	0.951111	0.91266
K=16	0.982143	0.944646	0.971059	0.907071
K=16	0.988181	0.965476	0.960184	0.932156
K=16	0.979798	0.951094	0.9636	0.933905
K=16	0.969588	0.937991	0.918425	0.917846
K=16	0.985147	0.932573	0.968485	0.942029
K=16	0.978022	0.937374	0.946465	0.930505
K=16	0.981729	0.936688	0.945513	0.892957
K=16	0.968599	0.888752	0.941616	0.93697
K=16	0.983258	0.944712	0.982136	0.934028
K=16	0.9876	0.965036	0.930757	0.967987
K=16	0.98752	0.932773	0.9518	0.945578
K=16	0.986378	0.938717	0.966747	0.948529
K=16	0.978391	0.972189	0.965786	0.932677
K=16	0.990196	0.974307	0.944444	0.89372
K=16	0.96256	0.915	0.93149	0.895522
K=16	0.993633	0.960749	0.972702	0.943177
K=16	0.971206	0.957576	0.935897	0.944399
K=16	0.971683	0.977564	0.963068	0.941389
K=16	0.965322	0.960832	0.943588	0.929293
K=16	0.986752	0.86482	0.94351	0.92597
K=16	0.96757	0.954106	0.92537	0.891409
K=16	0.983942	0.920215	0.916868	0.891957
K=16	0.971154	0.934374	0.933737	0.948379
K=16	0.949477	0.945378	0.960521	0.942107
K=16	0.984932	0.944646	0.957532	0.907708
K=16	0.9722	0.960832	0.94351	0.934253
K=16	0.975625	0.960526	0.933573	0.95166
K=16	0.9994	0.940271	0.953834	0.925568
K=16	0.962424	0.910649	0.987395	0.932955
K=16	0.965386	0.938515	0.93901	0.942424
K=16	0.981337	0.977318	0.970208	0.892311
K=16	0.989459	0.934319	0.92513	0.949231
K=16	0.949167	0.952719	0.96095	0.928085
K=16	0.96875	0.962264	0.942626	0.937175
K=16	0.97011	0.922169	0.917472	0.891515
K=16	0.993961	0.968687	0.919968	0.895604
K=16	0.951425	0.945328	0.9762	0.896034
K=16	0.983494	0.958744	0.96106	0.907062
K=16	0.945178	0.943998	0.9712	0.915056
K=16	0.977301	0.914693	0.990986	0.879437
K=16	0.959418	0.918605	0.957386	0.885755
K=16	0.984344	0.956706	0.925589	0.948889
K=16	0.968286	0.9468	0.945112	0.906467
K=16	0.994318	0.922277	0.974343	0.915152
K=16	0.981436	0.9718	0.969212	0.880952
K=16	0.979125	0.953181	0.944847	0.945403
K=16	0.976763	0.9746	0.964543	0.934295
K=16	0.961338	0.904762	0.953926	0.921875
K=16	0.979326	0.937601	0.960346	0.9634
K=16	0.985	0.960547	0.946023	0.886364
K=16	0.973956	0.952724	0.9494	0.917693
K=16	0.971189	0.94972	0.950921	0.964491
K=16	0.966518	0.941106	0.966586	0.903452
K=16	0.996	0.9374	0.962866	0.920673
K=16	0.978261	0.934109	0.931111	0.955864
K=16	0.972155	0.966186	0.958534	0.898237
K=16	0.965781	0.905345	0.955717	0.92707
K=16	0.994318	0.935588	0.982171	0.903226
K=16	0.974432	0.898718	0.94898	0.917208
K=16	0.961851	0.949017	0.97144	0.9182
K=16	0.971032	0.974779	0.967187	0.902917
K=16	0.968474	0.896385	0.954526	0.891071
K=16	0.987595	0.940419	0.956783	0.966869
K=16	0.990004	0.954141	0.944805	0.972389
K=16	0.942308	0.938958	0.93179	0.91893
K=16	0.959944	0.931615	0.930088	0.936975
K=16	0.982488	0.947292	0.936667	0.922569
K=16	0.988115	0.969792	0.961461	0.893542
K=16	0.978586	0.939582	0.949878	0.924024
K=16	0.967634	0.949472	0.962438	0.905141
K=16	0.970373	0.896759	0.935974	0.911987
K=16	0.968186	0.96303	0.978365	0.934364
K=16	0.937575	0.9534	0.944847	0.92975
K=16	0.963268	0.954167	0.93427	0.91377
K=16	0.97654	0.874597	0.959541	0.939375
K=16	0.968333	0.944515	0.973333	0.934729
K=16	0.970442	0.908253	0.903409	0.891208
K=16	0.958022	0.940976	0.941818	0.950321
K=16	0.987677	0.932003	0.959154	0.888599
K=16	0.991024	0.949713	0.961151	0.932959
K=16	0.976162	0.981935	0.957512	0.909416
K=16	0.976664	0.9524	0.9478	0.911327
K=16	0.983139	0.956242	0.959184	0.886993
K=16	0.983234	0.922208	0.937776	0.907873
K=16	0.983994	0.962588	0.9742	0.908363
K=16	0.99596	0.968398	0.9572	0.948317
K=16	0.991274	0.940404	0.934974	0.865208
K=16	0.982549	0.922828	0.926082	0.938333
K=16	0.992323	0.942777	0.943798	0.942393
K=16	0.961616	0.932121	0.952921	0.911125
K=16	0.978287	0.9802	0.964	0.919596
K=16	0.977722	0.943084	0.941907	0.877029
K=16	0.984794	0.970895	0.933644	0.95283
K=16	0.95556	0.961739	0.9654	0.894683
K=16	0.9786	0.934862	0.980992	0.965934
K=16	0.981193	0.951691	0.962292	0.888393
K=16	0.979394	0.977679	0.972906	0.904589
K=16	0.959541	0.962828	0.942177	0.968587
K=16	0.974026	0.964901	0.942424	0.912972
K=16	0.958586	0.93982	0.972256	0.953125
K=16	0.986395	0.966721	0.9568	0.909018
K=16	0.974792	0.944515	0.944378	0.860105
K=16	0.967387	0.953523	0.979192	0.913647
K=16	0.964083	0.930772	0.940419	0.960181
K=16	0.970092	0.961648	0.985949	0.928161
K=16	0.995985	0.95989	0.951087	0.930845
K=16	0.949275	0.958539	0.954182	0.902597
K=16	0.985625	0.890956	0.944378	0.89922
K=16	0.98896	0.956281	0.955833	0.911526
K=16	0.956783	0.943639	0.968801	0.907193
K=16	0.976643	0.951923	0.949293	0.874133
K=16	0.9512	0.926482	0.956768	0.884943
K=16	0.984794	0.975361	0.94	0.935304
K=16	0.96875	0.915966	0.945713	0.93277
K=16	0.97479	0.942745	0.967533	0.91951
K=16	0.963768	0.962464	0.952981	0.935152
K=16	0.979583	0.9541	0.968584	0.907252
K=16	0.989737	0.972005	0.928771	0.888674
K=16	0.948317	0.969697	0.974343	0.910106
K=16	0.989596	0.941153	0.982973	0.890151
K=16	0.977263	0.948068	0.965186	0.949167
K=16	0.980824	0.951381	0.965676	0.919643
K=16	0.97809	0.965728	0.946514	0.939438
K=16	0.991379	0.929688	0.920072	0.93438
K=16	0.9658	0.891766	0.947776	0.959454
K=16	0.973157	0.941991	0.959454	0.9228
K=16	0.950123	0.950303	0.958	0.930963
K=16	0.982939	0.91727	0.963636	0.951875
K=16	0.9592	0.967083	0.936594	0.964874
K=16	0.962139	0.932357	0.953937	0.960287
K=16	0.972403	0.924528	0.950622	0.934375
K=16	0.952674	0.946314	0.968888	0.939583
K=16	0.991173	0.962459	0.950123	0.958183
K=16	0.983476	0.95414	0.961212	0.923287
K=16	0.968547	0.946839	0.947115	0.922657
K=16	0.984498	0.975758	0.9128	0.90076
K=16	0.959447	0.981397	0.947061	0.927171
K=16	0.991228	0.95716	0.9718	0.923525
K=16	0.970353	0.954342	0.952381	0.959135
K=16	0.970388	0.955966	0.918506	0.944992
K=16	0.9721	0.929899	0.966587	0.907917
K=16	0.974548	0.957576	0.974343	0.934295
K=16	0.968254	0.894704	0.938607	0.935097
K=16	0.960016	0.945019	0.943761	0.902577
K=16	0.985377	0.935167	0.92508	0.941425
K=16	0.977057	0.973589	0.964071	0.878653
K=16	0.982537	0.908132	0.940104	0.912886
K=16	0.975807	0.9776	0.95069	0.976443
K=16	0.975962	0.9554	0.967987	0.962668
K=16	0.975043	0.917167	0.953325	0.915064
K=16	0.981085	0.929542	0.96875	0.927338
K=16	0.9776	0.938901	0.964944	0.930433
K=16	0.967147	0.958586	0.948255	0.918167
K=16	0.987083	0.947115	0.947646	0.888177
K=16	0.962256	0.95375	0.944311	0.875155
K=16	0.961755	0.960136	0.962185	0.917817
K=16	0.994209	0.928193	0.957848	0.921182
K=16	0.961002	0.915385	0.948458	0.951691
K=16	0.976	0.950721	0.922626	0.845576
K=16	0.963385	0.944847	0.948317	0.925859
K=16	0.985949	0.953734	0.919485	0.919013
K=16	0.978182	0.963688	0.954509	0.91033
K=16	0.970388	0.963542	0.942222	0.906061
K=16	0.984781	0.924968	0.928193	0.937175
K=16	0.982136	0.938607	0.976315	0.940419
K=16	0.945002	0.938198	0.975443	0.887378
K=16	0.971589	0.92125	0.961538	0.886937
K=16	0.967987	0.968889	0.934253	0.941656
K=16	0.97439	0.942925	0.969583	0.870793
K=16	0.990353	0.910511	0.955982	0.904362
K=16	0.982336	0.952792	0.9638	0.88417
K=16	0.99399	0.921224	0.961985	0.940417
K=16	0.966787	0.925417	0.946779	0.923936
K=16	0.972389	0.920422	0.96875	0.923175
K=16	0.990165	0.962828	0.93596	0.907292
K=16	0.999188	0.968349	0.933894	0.920491
K=16	0.960346	0.957933	0.972957	0.919192
K=16	0.987795	0.930772	0.94375	0.909823
K=16	0.979421	0.94724	0.982638	0.899583
K=16	0.965275	0.921053	0.934765	0.929966
K=16	0.960836	0.92303	0.965051	0.885154
K=16	0.9644	0.964944	0.9246	0.90625
K=16	0.977991	0.935096	0.965877	0.924762
K=16	0.981993	0.94125	0.951581	0.910364
K=16	0.982083	0.9512	0.965946	0.9475
K=16	0.974545	0.917102	0.945859	0.907997
K=16	0.98876	0.921699	0.950483	0.913097
K=16	0.998346	0.963636	0.971989	0.876751
K=16	0.977091	0.947579	0.942118	0.896141
K=16	0.965097	0.941022	0.949119	0.906365
K=16	0.981793	0.948481	0.945845	0.913689
K=16	0.965208	0.945731	0.932266	0.895374
K=16	0.98875	0.938629	0.954748	0.874717
K=16	0.979124	0.943434	0.946608	0.950505
K=16	0.988425	0.953896	0.918478	0.923852
K=16	0.967213	0.927	0.962626	0.936849
K=16	0.977657	0.912747	0.953982	0.902047
K=16	0.973304	0.967071	0.980984	0.88711
K=16	0.9824	0.925859	0.924679	0.913849
K=16	0.995151	0.950823	0.971644	0.934477
K=16	0.99	0.948214	0.948184	0.951172
K=16	0.956919	0.914748	0.925541	0.91246
K=16	0.992323	0.958192	0.972727	0.931773
K=16	0.965068	0.96328	0.930601	0.894494
K=16	0.990796	0.940747	0.954343	0.93574
K=16	0.962662	0.948718	0.928069	0.948928
K=16	0.997702	0.923108	0.954235	0.863525
K=16	0.974576	0.971698	0.945253	0.911859
K=16	0.979167	0.9418	0.942424	0.944835
K=16	0.988582	0.902047	0.952027	0.9132
K=16	0.988796	0.91613	0.974908	0.908662
K=16	0.968081	0.9328	0.959936	0.896559
K=16	0.98009	0.922828	0.949678	0.925382
K=16	0.983258	0.979066	0.949275	0.949275
K=16	0.994575	0.955417	0.956169	0.946839
K=16	0.98876	0.949408	0.931891	0.966787
K=16	0.9616	0.904242	0.969691	0.93676
K=16	0.992816	0.946552	0.971515	0.971185
K=16	0.970494	0.903161	0.953031	0.908763
K=16	0.96234	0.935417	0.952468	0.953431
K=16	0.986667	0.92488	0.961968	0.931313
K=16	0.967825	0.939815	0.922521	0.898098
K=16	0.956372	0.945403	0.962465	0.902449
K=16	0.9696	0.947572	0.967329	0.935755
K=16	0.98101	0.965781	0.949477	0.888956
K=16	0.983958	0.915254	0.980878	0.93597
K=16	0.977364	0.96838	0.956566	0.943994
K=16	0.967787	0.952295	0.954911	0.903003
K=16	0.98591	0.955582	0.979744	0.91697
K=16	0.990385	0.937802	0.943109	0.8744
K=16	0.983969	0.932292	0.932156	0.951522
K=16	0.961461	0.897959	0.948184	0.93945
K=16	0.981322	0.92931	0.941106	0.949275
K=16	0.949678	0.954106	0.962762	0.951691
K=16	0.964874	0.964986	0.964874	0.897029
K=16	0.966458	0.931042	0.909893	0.94237
K=16	0.985051	0.921212	0.960227	0.954583
K=16	0.9572	0.951652	0.976114	0.90202
K=16	0.981771	0.955833	0.956042	0.894821
K=16	0.952468	0.907708	0.917673	0.913097
K=16	0.9388	0.947379	0.962589	0.904447
K=16	0.981393	0.934253	0.942377	0.912109
K=16	0.981527	0.91523	0.979792	0.942959
K=16	0.989396	0.907452	0.940419	0.890249
K=16	0.956915	0.969212	0.978924	0.94423
K=16	0.9704	0.922657	0.946579	0.899192
K=16	0.994343	0.975912	0.979269	0.936353
K=16	0.949612	0.925176	0.9524	0.937
K=16	0.974141	0.918103	0.947179	0.874949
K=16	0.969156	0.957708	0.955717	0.9412
K=16	0.969622	0.966538	0.965877	0.893818
K=16	0.97792	0.961338	0.955929	0.954235
K=16	0.956575	0.917817	0.962785	0.9394
K=16	0.97426	0.958383	0.954035	0.932373
K=16	0.985516	0.959583	0.969622	0.90743
K=16	0.977858	0.930172	0.919568	0.916667
K=16	0.976991	0.944742	0.968888	0.95125
K=16	0.9898	0.941176	0.947979	0.967665
K=16	0.982537	0.942473	0.919217	0.932292
K=16	0.97541	0.932773	0.950422	0.876566
K=16	0.978542	0.962385	0.963567	0.944104
K=16	0.98789	0.93322	0.976948	0.945657
K=16	0.942508	0.950081	0.9592	0.951042
K=16	0.963125	0.933239	0.959394	0.935944
K=16	0.966102	0.934783	0.960658	0.913837
K=16	0.9856	0.951425	0.896701	0.902852
K=16	0.989697	0.946144	0.895349	0.914291
K=16	0.9738	0.950123	0.938204	0.959889
K=16	0.987391	0.935789	0.9525	0.937708
K=16	0.989996	0.930303	0.9406	0.9116
K=16	0.975403	0.954097	0.959944	0.908414
K=16	0.97599	0.898148	0.94084	0.928945
K=16	0.998788	0.890004	0.944601	0.91467
K=16	0.985252	0.945124	0.971591	0.950599
K=16	0.990365	0.938301	0.922276	0.916044
K=16	0.97552	0.962222	0.950944	0.909054
K=16	0.99596	0.948458	0.951581	0.898148
K=16	0.935129	0.939024	0.960024	0.911058
K=16	0.963542	0.926153	0.957732	0.9373
K=16	0.992573	0.949	0.956387	0.920566
K=16	0.985657	0.908454	0.961461	0.923309
K=16	0.980157	0.9502	0.959053	0.931855
K=16	0.963636	0.958454	0.984794	0.910657
K=16	0.968264	0.946875	0.907671	0.938575
K=16	0.984781	0.946715	0.967938	0.938921
K=16	0.958788	0.894141	0.962054	0.928972
K=16	0.947849	0.92918	0.912965	0.916499
K=16	0.977391	0.945211	0.955918	0.939019
K=16	0.9546	0.943597	0.964472	0.948276
K=16	0.964286	0.936557	0.940905	0.948687
K=16	0.988231	0.941572	0.952027	0.929992
K=16	0.975041	0.964986	0.964171	0.891026
K=16	0.966875	0.96126	0.953432	0.933444
K=16	0.979192	0.950823	0.933172	0.920237
K=16	0.974508	0.962963	0.990562	0.964692
K=16	0.984403	0.938378	0.954725	0.936337
K=16	0.960859	0.974638	0.974092	0.899523
K=16	0.990625	0.960625	0.962872	0.917898
K=16	0.957045	0.939103	0.970373	0.936575
K=16	0.986465	0.93438	0.942734	0.94696
K=16	0.9662	0.960749	0.930951	0.887175
K=16	0.967	0.955982	0.96328	0.9352
K=16	0.986595	0.964844	0.965877	0.947086
K=16	0.983541	0.931717	0.944578	0.933542
K=16	0.975446	0.935789	0.961648	0.914409
K=16	0.985657	0.976162	0.943994	0.929091
K=16	0.977778	0.949067	0.970494	0.887395
K=16	0.935202	0.891304	0.92493	0.913199
K=16	0.951219	0.912765	0.975151	0.956443
K=16	0.961042	0.935574	0.930303	0.896768
K=16	0.960208	0.937601	0.974908	0.908405
K=16	0.968591	0.95211	0.896739	0.926969
K=16	0.974783	0.942925	0.964271	0.877068
K=16	0.986453	0.942331	0.946869	0.940776
K=16	0.98876	0.929146	0.97604	0.923175
K=16	0.989763	0.935304	0.970388	0.945048
K=16	0.978384	0.907763	0.911535	0.895089
K=16	0.965454	0.961414	0.988782	0.913966
K=16	0.959784	0.920049	0.955049	0.923838
K=16	0.98101	0.932917	0.9675	0.90408
K=16	0.98752	0.960951	0.96202	0.898872
K=16	0.975724	0.929803	0.935367	0.881883
K=16	0.989042	0.919082	0.960951	0.938818
K=16	0.97182	0.941298	0.933958	0.917302
K=16	0.967342	0.962385	0.943841	0.928774
K=16	0.98009	0.930489	0.962785	0.933774
K=16	0.992766	0.930354	0.935774	0.862847
K=16	0.959535	0.917067	0.949477	0.888081
K=16	0.99458	0.933497	0.964271	0.944912
K=16	0.937192	0.91133	0.965728	0.920915
K=16	0.9626	0.942734	0.944912	0.900452
K=16	0.985427	0.955732	0.961585	0.931615
K=16	0.97599	0.90096	0.9654	0.940731
K=16	0.963067	0.866667	0.953301	0.891711
K=16	0.968286	0.9724	0.953328	0.919181
K=16	0.939728	0.960257	0.928771	0.900417
K=16	0.95899	0.936566	0.964744	0.934426
K=16	0.947579	0.964744	0.966315	0.950505
K=16	0.973	0.948317	0.961875	0.913961
K=16	0.98778	0.966458	0.949477	0.889029
K=16	0.983897	0.953342	0.937375	0.904937
K=16	0.955329	0.915179	0.903962	0.943309
K=16	0.971264	0.924929	0.962185	0.9432
K=16	0.962385	0.973896	0.931818	0.896559
K=16	0.962865	0.948739	0.990869	0.90157
K=16	0.976437	0.930349	0.986312	0.929542
K=16	0.978191	0.956486	0.952997	0.933172
K=16	0.984195	0.933737	0.967548	0.892323
K=16	0.965853	0.910564	0.9666	0.909467
K=16	0.969359	0.932893	0.942	0.932156
K=16	0.98137	0.916667	0.927273	0.924444
K=16	0.99618	0.959944	0.955147	0.8544
K=16	0.990968	0.950422	0.965946	0.914251
K=16	0.971515	0.951515	0.967938	0.846137
K=16	0.981938	0.974638	0.966385	0.904146
K=16	0.981331	0.928166	0.97539	0.960257
K=16	0.934949	0.8918	0.9575	0.900161
K=16	0.96234	0.926667	0.930398	0.900974
K=16	0.955	0.948388	0.955038	0.940016
K=16	0.967147	0.949678	0.976114	0.932292
K=16	0.993175	0.942268	0.921718	0.92275
K=16	0.970155	0.914693	0.914	0.944164
K=16	0.972989	0.931207	0.929688	0.918355
K=16	0.969212	0.921278	0.948269	0.919846
K=16	0.975694	0.955357	0.954106	0.892901
K=16	0.970576	0.952921	0.931457	0.94062
K=16	0.970788	0.952474	0.974141	0.950944
K=16	0.976437	0.938384	0.952925	0.8854
K=16	0.957007	0.964573	0.96	0.896858
K=16	0.982939	0.948918	0.956281	0.963185
K=16	0.977273	0.933535	0.947611	0.933978
K=16	0.974779	0.938125	0.963271	0.933292
K=16	0.960938	0.919271	0.976	0.858892
K=16	0.9562	0.980035	0.969988	0.898305
K=16	0.96202	0.945432	0.97362	0.90056
K=16	0.98053	0.945513	0.959053	0.93863
K=16	0.955974	0.944444	0.960116	0.959192
K=16	0.94992	0.952586	0.955329	0.920368
K=16	0.97343	0.947779	0.939005	0.925523
K=16	0.954928	0.928687	0.936772	0.946407
K=16	0.997478	0.958454	0.939211	0.870257
K=16	0.983258	0.95118	0.967634	0.923838
K=16	0.973524	0.974141	0.949017	0.886248
K=16	0.937703	0.96043	0.937575	0.948892
K=16	0.955239	0.9752	0.9352	0.873579
K=16	0.984702	0.964448	0.976963	0.947457
K=16	0.995659	0.943597	0.977391	0.911659
K=16	0.987118	0.942794	0.966346	0.923909
K=16	0.990869	0.967938	0.973417	0.9046
K=16	0.992083	0.957045	0.968789	0.922828
K=16	0.966162	0.975443	0.97623	0.889037
K=16	0.964271	0.937775	0.9682	0.831458
K=16	0.96101	0.936293	0.916051	0.914843
K=16	0.967071	0.943438	0.9576	0.900579
K=16	0.956342	0.9546	0.969401	0.940731
K=16	0.934574	0.9346	0.966747	0.926339
K=16	0.982287	0.961118	0.962185	0.864111
K=16	0.978333	0.944992	0.934949	0.894
K=16	0.972155	0.967082	0.952381	0.935353
K=16	0.972021	0.951691	0.9373	0.927956
K=16	0.97541	0.945604	0.975852	0.930013
K=16	0.967912	0.964692	0.9638	0.925122
K=16	0.977364	0.943697	0.914251	0.953333
K=16	0.988576	0.965	0.966928	0.895424
K=16	0.975	0.945402	0.951224	0.898958
K=16	0.978788	0.936899	0.953131	0.913939
K=16	0.976042	0.918654	0.9756	0.905193
K=16	0.947917	0.969583	0.944444	0.867552
K=16	0.984088	0.910225	0.956644	0.912084
K=16	0.98752	0.985796	0.982222	0.937818
K=16	0.967677	0.940681	0.98128	0.92975
K=16	0.9838	0.937579	0.965524	0.905993
K=16	0.9706	0.963001	0.94582	0.931965
K=16	0.98368	0.914766	0.944646	0.889091
K=16	0.985531	0.909073	0.94	0.915254
K=16	0.98404	0.97348	0.962233	0.927557
K=16	0.96895	0.936544	0.964586	0.908563
K=16	0.949472	0.964901	0.918105	0.935556
K=16	0.948052	0.934163	0.973589	0.882389
K=16	0.980699	0.957917	0.971554	0.9682
K=16	0.978261	0.966893	0.993998	0.890101
K=16	0.949	0.948283	0.964543	0.944581
K=16	0.930889	0.937151	0.974432	0.946839
K=16	0.95002	0.984143	0.933737	0.954639
K=16	0.9782	0.961662	0.962438	0.930707
K=16	0.998242	0.959139	0.9652	0.929348
K=16	0.971958	0.946747	0.946834	0.941453
K=16	0.981616	0.9584	0.970373	0.898742
K=16	0.977968	0.942177	0.979125	0.914773
K=16	0.984984	0.940787	0.94847	0.904791
K=16	0.974826	0.928	0.977118	0.914654
K=16	0.948718	0.930178	0.951856	0.942995
K=16	0.972021	0.914693	0.923478	0.91625
K=16	0.974359	0.967387	0.940885	0.928069
K=16	0.941977	0.948718	0.984946	0.891677
K=16	0.966787	0.950321	0.953333	0.910511
K=16	0.97995	0.961444	0.9696	0.932573
K=16	0.976114	0.9396	0.931457	0.921818
K=16	0.984291	0.922889	0.975761	0.953502
K=16	0.97326	0.9722	0.966387	0.940217
K=16	0.924528	0.949097	0.96949	0.896158
K=16	0.973229	0.953737	0.950505	0.941977
K=16	0.981436	0.95206	0.943978	0.912765
K=16	0.982828	0.943288	0.94992	0.922169
K=16	0.969089	0.931006	0.92086	0.914062
K=16	0.951299	0.943434	0.951244	0.901067
K=16	0.974343	0.895901	0.991477	0.949275
K=16	0.97419	0.89	0.975985	0.932893
K=16	0.9814	0.908201	0.934659	0.918277
K=16	0.962169	0.931049	0.972222	0.947579
K=16	0.982891	0.950521	0.926667	0.915766
K=16	0.954782	0.961939	0.950721	0.906199
K=16	0.955329	0.970238	0.965932	0.967735
K=16	0.978384	0.969622	0.939984	0.957246
K=16	0.949293	0.966102	0.94958	0.935568
K=16	0.988636	0.960628	0.941306	0.882753
K=16	0.961749	0.895833	0.956443	0.928571
K=16	0.974159	0.96798	0.953202	0.891226
K=16	0.990625	0.951448	0.937906	0.859931
K=16	0.959437	0.919181	0.942292	0.935625
K=16	0.984084	0.954327	0.928397	0.956162
K=16	0.968316	0.905126	0.96095	0.93625
K=16	0.963567	0.935167	0.963067	0.916465
K=16	0.979968	0.940376	0.94351	0.917673
K=16	0.977391	0.965503	0.97539	0.937776
K=16	0.92513	0.962385	0.965932	0.923092
K=16	0.971015	0.951299	0.951448	0.862923
K=16	0.947499	0.93945	0.965982	0.913165
K=16	0.969752	0.913829	0.947646	0.933497
K=16	0.969807	0.967127	0.941425	0.894375
K=16	0.974583	0.982638	0.973832	0.866102
K=16	0.975575	0.915094	0.933701	0.936415
K=16	0.960836	0.976364	0.939123	0.884826
K=16	0.974359	0.937168	0.970152	0.934319
K=16	0.981527	0.973958	0.926153	0.929293
K=16	0.98303	0.935065	0.919671	0.921875
K=16	0.976461	0.963922	0.943145	0.952313
K=16	0.986378	0.964655	0.9698	0.920008
K=16	0.964444	0.92776	0.969899	0.870192
K=16	0.966263	0.964646	0.960808	0.921257
K=16	0.971096	0.956486	0.939326	0.951489
K=16	0.973956	0.949204	0.94492	0.907475
K=16	0.981085	0.951515	0.957576	0.938209
K=16	0.97182	0.946834	0.964543	0.944
K=16	0.974959	0.940265	0.952381	0.923707
K=16	0.950534	0.972222	0.976791	0.92042
K=16	0.968582	0.921248	0.943492	0.863125
K=16	0.9734	0.928601	0.964543	0.91875
K=16	0.986667	0.915861	0.95263	0.922867
K=16	0.98752	0.960859	0.968596	0.922075
K=16	0.980903	0.93438	0.912238	0.945211
K=16	0.975561	0.973758	0.921296	0.927941
K=16	0.974904	0.92202	0.938976	0.898098
K=16	0.977917	0.924725	0.950282	0.934312
K=16	0.988636	0.932692	0.969752	0.933293
K=16	0.967342	0.944171	0.952123	0.913766
K=16	0.978693	0.941298	0.948718	0.92728
K=16	0.958996	0.911875	0.971755	0.938542
K=16	0.996144	0.940505	0.959936	0.921248
K=16	0.970833	0.912485	0.947677	0.913394
K=16	0.956778	0.932525	0.934495	0.946875
K=16	0.946374	0.916667	0.925933	0.899959
K=16	0.982593	0.946779	0.940705	0.917292
K=16	0.993131	0.923909	0.970695	0.887348
K=16	0.939039	0.927484	0.945913	0.926736
K=16	0.968988	0.974609	0.955113	0.946813
K=16	0.982398	0.88202	0.9506	0.931313
K=16	0.969351	0.919711	0.9522	0.923636
K=16	0.974235	0.963141	0.972756	0.898512
K=16	0.965322	0.926263	0.958198	0.94582
K=16	0.995385	0.940505	0.934564	0.922889
K=16	0.980266	0.921699	0.957045	0.945883
K=16	0.955529	0.96838	0.950087	0.913913
K=16	0.970152	0.957532	0.938788	0.946042
K=16	0.973846	0.944581	0.957292	0.931763
K=16	0.970788	0.926745	0.9167	0.910478
K=16	0.999599	0.950521	0.968344	0.900808
K=16	0.985994	0.9522	0.955665	0.953453
K=16	0.989245	0.981734	0.944646	0.969551
K=16	0.959674	0.925725	0.937374	0.932088
K=16	0.992248	0.989583	0.955556	0.896635
K=16	0.987479	0.920404	0.966479	0.951149
K=16	0.996817	0.967879	0.97144	0.945813
K=16	0.970925	0.923232	0.929487	0.974159
K=16	0.972199	0.964691	0.935167	0.907407
K=16	0.9745	0.951765	0.97	0.934792
K=16	0.984704	0.971032	0.98062	0.916868
K=16	0.96388	0.948269	0.9556	0.852
K=16	0.990057	0.962666	0.982993	0.902626
K=16	0.951717	0.961184	0.983563	0.933962
K=16	0.982173	0.953531	0.897832	0.92644
K=16	0.975244	0.972902	0.953972	0.855928
K=16	0.979167	0.954167	0.964	0.954436
K=16	0.983272	0.964386	0.937901	0.936782
K=16	0.938375	0.93179	0.932824	0.907273
K=16	0.951219	0.9256	0.937198	0.941356
K=16	0.963585	0.910256	0.974908	0.927134
K=16	0.973542	0.919388	0.9672	0.914463
K=16	0.973737	0.978917	0.938702	0.903679
K=16	0.993179	0.93625	0.970753	0.9475
K=16	0.979167	0.871073	0.942952	0.908889
K=16	0.948958	0.930153	0.967483	0.920422
K=16	0.969002	0.961385	0.934774	0.922073
K=16	0.988791	0.950422	0.961338	0.950328
K=16	0.965177	0.93179	0.9762	0.870833
K=16	0.970553	0.969112	0.933293	0.949
K=16	0.986178	0.914566	0.967127	0.901561
K=16	0.971313	0.972816	0.9684	0.893035
K=16	0.998783	0.9288	0.9654	0.895433
K=16	0.959135	0.959565	0.945913	0.924929
K=16	0.974436	0.933442	0.954182	0.918605
K=16	0.967329	0.948579	0.930149	0.914566
K=16	0.934095	0.957102	0.951094	0.940717
K=16	0.971476	0.946608	0.949293	0.935625
K=16	0.979526	0.921498	0.977564	0.879798
K=16	0.917115	0.94159	0.954637	0.909655
K=16	0.963185	0.929172	0.933905	0.937575
K=16	0.96949	0.930214	0.95653	0.909273
K=16	0.955329	0.965728	0.956931	0.907083
K=16	0.97375	0.925331	0.956983	0.959487
K=16	0.992774	0.921593	0.959213	0.939728
K=16	0.977118	0.954113	0.953781	0.913807
K=16	0.973357	0.950609	0.929417	0.896566
K=16	0.981079	0.945112	0.940385	0.9254
K=16	0.971236	0.98	0.94992	0.898604
K=16	0.969588	0.980329	0.945513	0.933967
K=16	0.984702	0.9508	0.941657	0.958816
K=16	0.955049	0.937778	0.959192	0.963768
K=16	0.973357	0.954639	0.972323	0.896829
K=16	0.98164	0.953834	0.965503	0.856162
K=16	0.980416	0.918401	0.969375	0.956897
K=16	0.977364	0.930288	0.957732	0.943791
K=16	0.961818	0.942268	0.952295	0.964646
K=16	0.969652	0.930958	0.960784	0.886809
K=16	0.987419	0.954182	0.948	0.885557
K=16	0.991971	0.944847	0.976768	0.946667
K=16	0.994066	0.929372	0.966346	0.9118
K=16	0.970501	0.961212	0.9094	0.912689
K=16	0.954526	0.940636	0.95058	0.906377
K=16	0.96371	0.912929	0.985859	0.917268
K=16	0.963341	0.970033	0.957131	0.831919
K=16	0.966583	0.94	0.933173	0.889408
K=16	0.962762	0.961151	0.942708	0.918919
K=16	0.978182	0.946226	0.953	0.897143
K=16	0.979392	0.966748	0.970494	0.888413
K=16	0.985577	0.953692	0.908763	0.895525
K=16	0.987069	0.943958	0.969359	0.936458
K=16	0.979583	0.918561	0.961939	0.955729
K=16	0.980992	0.944646	0.939815	0.960384
K=16	0.968169	0.957983	0.939783	0.887997
K=16	0.970624	0.953181	0.968687	0.939394
K=16	0.984702	0.929293	0.946779	0.907813
K=16	0.972906	0.894231	0.947379	0.912861
K=16	0.982708	0.963185	0.967949	0.92
K=16	0.975311	0.919887	0.9342	0.882083
K=16	0.9924	0.975267	0.969691	0.904792
K=16	0.97559	0.963474	0.964096	0.883726
K=16	0.963365	0.960227	0.971899	0.882222
K=16	0.935174	0.922208	0.963875	0.920915
K=16	0.970909	0.919335	0.93129	0.896566
K=16	0.976251	0.932967	0.952929	0.859776
K=16	0.960346	0.89651	0.940833	0.95104
K=16	0.944196	0.929087	0.980625	0.958586
K=16	0.985105	0.955128	0.920765	0.926136
K=16	0.95211	0.955023	0.939798	0.967748
K=16	0.963108	0.921517	0.952291	0.884176
K=16	0.981905	0.946667	0.960832	0.945008
K=16	0.932203	0.951581	0.952524	0.945302
K=16	0.952292	0.950599	0.964489	0.909091
K=16	0.979792	0.969359	0.9588	0.917381
K=16	0.992929	0.954844	0.9456	0.92303
K=16	0.986248	0.943288	0.939984	0.9228
K=16	0.985377	0.934564	0.963742	0.926357
K=16	0.974026	0.976601	0.95118	0.922484
K=16	0.954982	0.959984	0.971216	0.922619
K=16	0.971515	0.937099	0.951224	0.857083
K=16	0.9444	0.930829	0.963688	0.905141
K=16	0.974839	0.959253	0.956522	0.915668
K=16	0.960625	0.960184	0.978261	0.939613
K=16	0.985708	0.93901	0.960202	0.936079
K=16	0.977764	0.967082	0.963164	0.933703
K=16	0.962626	0.905248	0.971096	0.91798
K=16	0.957792	0.952	0.969289	0.901693
K=16	0.991667	0.929621	0.941761	0.919034
K=16	0.958192	0.943145	0.961	0.922687
K=16	0.992224	0.952727	0.965986	0.932224
K=16	0.965097	0.930398	0.971059	0.908076
K=16	0.979744	0.948071	0.92404	0.863746
K=16	0.969404	0.94766	0.966162	0.885283
K=16	0.976162	0.913845	0.9439	0.952727
K=16	0.990353	0.946223	0.94625	0.95283
K=16	0.9748	0.9272	0.962963	0.882184
K=16	0.987352	0.953328	0.965386	0.949612
K=16	0.976671	0.93947	0.97437	0.886391
K=16	0.986536	0.919625	0.973558	0.957923
K=16	0.976948	0.950087	0.967987	0.921593
K=16	0.962865	0.983994	0.934684	0.964504
K=16	0.976336	0.952672	0.95613	0.93489
K=16	0.976852	0.962626	0.939211	0.949472
K=16	0.992774	0.939245	0.915865	0.949675
K=16	0.97348	0.896347	0.944805	0.932266
K=16	0.960984	0.958049	0.973888	0.924316
K=16	0.9656	0.934343	0.9634	0.938611
K=16	0.983092	0.95246	0.940185	0.938209
K=16	0.97439	0.934163	0.947411	0.962465
K=16	0.956364	0.945	0.948283	0.917115
K=16	0.992552	0.951224	0.9444	0.9377
K=16	0.987195	0.951827	0.966989	0.914321
K=16	0.944602	0.953125	0.961818	0.935511
K=16	0.951299	0.916351	0.954182	0.912886
K=16	0.952228	0.970501	0.968953	0.902081
K=16	0.983	0.923235	0.944399	0.93165
K=16	0.965061	0.932692	0.928543	0.9408
K=16	0.978322	0.935202	0.946616	0.938218
K=16	0.969988	0.920313	0.982348	0.927335
K=16	0.964848	0.919013	0.968596	0.910457
K=16	0.962626	0.93599	0.950321	0.937917
K=16	0.955113	0.956731	0.96125	0.960808
K=16	0.995477	0.968186	0.940776	0.888822
K=16	0.978365	0.94186	0.935167	0.911669
K=16	0.966989	0.899639	0.951448	0.916465
K=16	0.97519	0.940341	0.959565	0.921477
K=16	0.983766	0.97539	0.951448	0.906374
K=16	0.976315	0.922705	0.958937	0.948661
K=16	0.97559	0.950599	0.946809	0.944805
K=16	0.983793	0.968485	0.952727	0.934729
K=16	0.955966	0.940471	0.941306	0.881616
K=16	0.97806	0.947368	0.964692	0.919237
K=16	0.970092	0.94696	0.964646	0.940821
K=16	0.997537	0.964448	0.974559	0.907879
K=16	0.99286	0.978591	0.9662	0.916461
K=16	0.977791	0.962963	0.962359	0.889022
K=16	0.960404	0.9258	0.932833	0.950707
K=16	0.942331	0.943572	0.940433	0.947879
K=16	0.95058	0.968209	0.9796	0.893473
K=16	0.984299	0.984903	0.964143	0.918425
K=16	0.952586	0.94371	0.9596	0.909876
K=16	0.986595	0.943588	0.965378	0.884441
K=16	0.9732	0.9643	0.95197	0.918719
K=16	0.985194	0.925579	0.951122	0.81375
K=16	0.977374	0.933978	0.974	0.95034
K=16	0.985347	0.911947	0.964673	0.918567
K=16	0.95607	0.94391	0.942833	0.909483
K=16	0.980417	0.946715	0.958807	0.923498
K=16	0.983393	0.943636	0.932061	0.964035
K=16	0.982708	0.952083	0.959253	0.948269
K=16	0.97809	0.941506	0.970152	0.92212
K=16	0.979871	0.964646	0.942626	0.906
K=16	0.961538	0.952997	0.967748	0.911717
K=16	0.971591	0.931615	0.965051	0.934343
K=16	0.972902	0.943232	0.9406	0.904075
K=16	0.980416	0.959584	0.958651	0.888821
K=16	0.975443	0.951111	0.925903	0.924672
K=16	0.969765	0.945451	0.967962	0.9242
K=16	0.972826	0.967273	0.962985	0.898148
K=16	0.964986	0.94391	0.973589	0.895022
K=16	0.961141	0.946178	0.9742	0.926969
K=16	0.987071	0.959213	0.952691	0.915758
K=16	0.970505	0.970553	0.981884	0.942573
K=16	0.971	0.944602	0.966587	0.899237
K=16	0.962292	0.951827	0.95512	0.950393
K=16	0.98334	0.933644	0.971589	0.949217
K=16	0.94721	0.963542	0.983766	0.9172
K=16	0.986875	0.965417	0.937577	0.907563
K=16	0.973131	0.924848	0.967987	0.926855
K=16	0.987195	0.931583	0.944111	0.947849
K=16	0.986658	0.966385	0.958535	0.966162
K=16	0.980569	0.98048	0.959742	0.9282
K=16	0.980128	0.932959	0.914773	0.925781
K=16	0.980777	0.967159	0.950303	0.904093
K=16	0.969112	0.91511	0.948779	0.934312
K=16	0.961758	0.972525	0.955864	0.9258
K=16	0.980128	0.970588	0.970101	0.932893
K=16	0.974159	0.913913	0.933762	0.914693
K=16	0.952525	0.900679	0.94721	0.907873
K=16	0.963333	0.919802	0.947646	0.945048
K=16	0.987273	0.945414	0.9568	0.902165
K=16	0.980925	0.939935	0.952324	0.961002
K=16	0.974432	0.957917	0.940747	0.939644
K=16	0.976364	0.932824	0.982224	0.920835
K=16	0.956572	0.933036	0.906262	0.910445
K=16	0.967755	0.964242	0.971015	0.909303
K=16	0.946144	0.934635	0.944511	0.960257
K=16	0.962424	0.961648	0.952929	0.909673
K=16	0.962465	0.919768	0.968344	0.892557
K=16	0.973758	0.958596	0.982348	0.93
K=16	0.97399	0.948892	0.9452	0.949269
K=16	0.976315	0.980475	0.923324	0.9072
K=16	0.978565	0.926263	0.966989	0.916066
K=16	0.979167	0.95494	0.971216	0.878856
K=16	0.971297	0.957848	0.951827	0.902232
K=16	0.955233	0.899341	0.958937	0.894558
K=16	0.993961	0.959074	0.970388	0.937784
K=16	0.9806	0.949302	0.971154	0.926061
K=16	0.984341	0.934984	0.956364	0.929117
K=16	0.966721	0.930101	0.953937	0.936703
K=16	0.974576	0.964874	0.975446	0.939304
K=16	0.965386	0.95773	0.9604	0.854957
K=16	0.989091	0.932959	0.942909	0.937577
K=16	0.963474	0.9172	0.968996	0.927484
K=16	0.995942	0.958183	0.954106	0.915496
K=16	0.97756	0.923678	0.948458	0.902188
K=16	0.982537	0.927885	0.922907	0.938976
K=16	0.979125	0.951401	0.989964	0.97375
K=16	0.970076	0.937369	0.953612	0.88474
K=16	0.972902	0.984375	0.950684	0.916364
K=16	0.95069	0.954639	0.957335	0.899557
K=16	0.979192	0.923904	0.97516	0.928945
K=16	0.960859	0.965986	0.960227	0.864332
K=16	0.9882	0.952123	0.91599	0.8922
K=16	0.977422	0.9394	0.957327	0.914663
K=16	0.932681	0.947368	0.94101	0.940577
K=16	0.974343	0.950921	0.9226	0.891515
K=16	0.994982	0.97899	0.964986	0.94492
K=16	0.990785	0.92918	0.95012	0.905762
K=16	0.988115	0.921296	0.89876	0.882828
K=16	0.998713	0.981193	0.94875	0.939583
K=16	0.97399	0.950101	0.956242	0.872987
K=16	0.962662	0.876667	0.958583	0.95104
K=16	0.967564	0.98128	0.965051	0.918462
K=16	0.979394	0.957383	0.95078	0.934495
K=16	0.946667	0.945963	0.945403	0.913301
K=16	0.986201	0.953834	0.938575	0.945805
K=16	0.93117	0.955	0.940544	0.899639
K=16	0.97619	0.939005	0.965833	0.934974
K=16	0.989042	0.908069	0.960658	0.923542
K=16	0.939613	0.967972	0.948718	0.929592
K=16	0.987756	0.947368	0.975443	0.951502
K=16	0.982549	0.966869	0.912965	0.932061
K=16	0.998346	0.954342	0.96303	0.918704
K=16	0.9676	0.935	0.953982	0.858629
K=16	0.968125	0.953781	0.919192	0.941153
K=16	0.976867	0.916868	0.955515	0.929754
K=16	0.9745	0.961985	0.9224	0.884043
K=16	0.931152	0.92029	0.953125	0.896158
K=16	0.9846	0.947179	0.959936	0.930195
K=16	0.961617	0.948518	0.961863	0.936333
K=16	0.967533	0.914367	0.929487	0.905859
K=16	0.960633	0.954837	0.920514	0.929287
K=16	0.982626	0.950622	0.955417	0.903646
K=16	0.983897	0.9167	0.96532	0.971789
K=16	0.977991	0.942377	0.962256	0.913383
K=16	0.96875	0.946429	0.982488	0.901738
K=16	0.976362	0.925657	0.968	0.9238
K=16	0.967071	0.9326	0.940705	0.919471
K=16	0.968187	0.923501	0.952873	0.929952
K=16	0.947061	0.981436	0.942794	0.93
K=16	0.987677	0.956281	0.93109	0.894895
K=16	0.972303	0.920715	0.957568	0.908609
K=16	0.970236	0.934896	0.943691	0.931754
K=16	0.994198	0.963321	0.949675	0.890707
K=16	0.969604	0.953581	0.949713	0.923812
K=16	0.978542	0.935574	0.975962	0.889697
K=16	0.9864	0.951781	0.936364	0.899167
K=16	0.959812	0.948276	0.9644	0.914855
K=16	0.988964	0.962083	0.947849	0.879457
K=16	0.953502	0.94492	0.961662	0.964171
K=16	0.98053	0.952381	0.934253	0.903741
K=16	0.978121	0.916081	0.9696	0.936688
K=16	0.971388	0.884405	0.950081	0.9375
K=16	0.970029	0.951633	0.924107	0.9232
K=16	0.966881	0.961959	0.97806	0.893678
K=16	0.982222	0.940066	0.939783	0.939211
K=16	0.986552	0.973823	0.947665	0.935568
K=16	0.936283	0.958984	0.982537	0.924496
K=16	0.964786	0.957327	0.972556	0.927956
K=16	0.957131	0.919912	0.976231	0.913662
K=16	0.995942	0.948918	0.943438	0.927171
K=16	0.994766	0.943841	0.949418	0.952027
K=16	0.981331	0.968687	0.9544	0.901212
K=16	0.976768	0.957778	0.97552	0.860187
K=16	0.973276	0.946223	0.942177	0.880322
K=16	0.99399	0.959041	0.966112	0.960024
K=16	0.979125	0.956783	0.964286	0.948672
K=16	0.984339	0.907963	0.9675	0.936594
K=16	0.988889	0.916051	0.963067	0.953818
K=16	0.957172	0.9652	0.938502	0.856061
K=16	0.968788	0.933644	0.930354	0.926
K=16	0.9886	0.972525	0.932427	0.929009
K=16	0.980073	0.947411	0.968687	0.92125
K=16	0.982993	0.968888	0.97756	0.889029
K=16	0.978322	0.916867	0.9512	0.927863
K=16	0.95845	0.9584	0.944308	0.940208
K=16	0.979708	0.945617	0.993268	0.939583
K=16	0.982	0.959655	0.955974	0.926471
K=16	0.978988	0.922222	0.97399	0.86303
K=16	0.955078	0.972426	0.965345	0.959584
K=16	0.985749	0.968992	0.978966	0.917789
K=16	0.967755	0.946608	0.952181	0.890657
K=16	0.991987	0.917503	0.947009	0.939904
K=16	0.988782	0.975151	0.971591	0.941377
K=16	0.979928	0.96798	0.93596	0.858344
K=16	0.970788	0.966184	0.905058	0.95946
K=16	0.982864	0.943978	0.961739	0.847739
K=16	0.988996	0.934774	0.973027	0.933776
K=16	0.974034	0.9178	0.9394	0.884792
K=16	0.976667	0.967548	0.95773	0.951122
K=16	0.959944	0.935296	0.929688	0.966875
K=16	0.979125	0.912917	0.927771	0.934374
K=16	0.9898	0.936485	0.944601	0.870417
K=16	0.957568	0.9404	0.946223	0.93514
K=16	0.966186	0.947646	0.945805	0.938801
K=16	0.972356	0.948718	0.966346	0.902449
K=16	0.981414	0.935268	0.960859	0.93899
K=16	0.95899	0.946756	0.97182	0.899633
K=16	0.953125	0.966583	0.935268	0.945978
K=16	0.935755	0.936485	0.957246	0.911057
K=16	0.962083	0.923123	0.960337	0.873985
K=16	0.973958	0.9438	0.9552	0.918167
K=16	0.978448	0.939904	0.965786	0.926328
K=16	0.969606	0.963434	0.948672	0.869988
K=16	0.959984	0.927917	0.959135	0.925121
K=16	0.987319	0.94492	0.957783	0.960796
K=16	0.968186	0.964343	0.958534	0.951691
K=16	0.9764	0.946223	0.97516	0.925179
K=16	0.966748	0.908201	0.95773	0.938013
K=16	0.956644	0.91244	0.957576	0.916923
K=16	0.966881	0.929103	0.941907	0.934364
K=16	0.990137	0.933962	0.934	0.925733
K=16	0.958333	0.939304	0.966989	0.848777
K=16	0.976716	0.936498	0.976047	0.906763
K=16	0.998199	0.954637	0.962644	0.856743
K=16	0.984143	0.961385	0.958383	0.949675
K=16	0.999554	0.889375	0.908333	0.929145
K=16	0.960337	0.947581	0.95653	0.90926
K=16	0.97491	0.907671	0.970588	0.94095
K=16	0.986263	0.956364	0.955556	0.933087
K=16	0.979326	0.9248	0.955654	0.955767
K=16	0.992774	0.962436	0.975151	0.923525
K=16	0.963585	0.981191	0.9537	0.903101
K=16	0.988506	0.95613	0.962644	0.962381
K=16	0.966787	0.955966	0.97	0.91523
K=16	0.946458	0.938788	0.952727	0.893758
K=16	0.998377	0.921593	0.94095	0.910076
K=16	0.987273	0.944935	0.968387	0.89723
K=16	0.95845	0.911465	0.920368	0.882577
K=16	0.951024	0.944444	0.941506	0.938037
K=16	0.95742	0.948672	0.910076	0.907121
K=16	0.963434	0.9008	0.941977	0.942057
K=16	0.982136	0.950823	0.954747	0.930288
K=16	0.96719	0.964573	0.964386	0.887521
K=16	0.985417	0.93263	0.95633	0.876751
K=16	0.973558	0.965252	0.943841	0.920112
K=16	0.954637	0.904255	0.965517	0.890045
K=16	0.990365	0.963415	0.94696	0.887879
K=16	0.95934	0.959565	0.970576	0.923701
K=16	0.954982	0.94541	0.980925	0.944444
K=16	0.971111	0.970788	0.976461	0.925903
K=16	0.98336	0.895538	0.940606	0.893669
K=16	0.956731	0.927151	0.927475	0.879026
K=16	0.953287	0.944605	0.92557	0.94371
K=16	0.983897	0.944048	0.913165	0.908662
K=16	0.982857	0.947273	0.912284	0.913565
K=16	0.9812	0.966747	0.938921	0.912981
K=16	0.968988	0.96101	0.929103	0.895556
K=16	0.9768	0.891277	0.949899	0.923309
K=16	0.985859	0.935556	0.946061	0.913958
K=16	0.981124	0.9816	0.9458	0.92457
K=16	0.97516	0.951581	0.978365	0.940586
K=16	0.972403	0.90645	0.961985	0.970909
K=16	0.969606	0.943994	0.964343	0.939583
K=16	0.97399	0.923232	0.946256	0.894283
K=16	0.984394	0.943958	0.945736	0.930437
K=16	0.957834	0.934343	0.968687	0.949619
K=16	0.952292	0.923707	0.954182	0.939815
K=16	0.970779	0.922705	0.935345	0.947706
K=16	0.982456	0.968547	0.962941	0.95421
K=16	0.972155	0.927971	0.974638	0.947475
K=16	0.975041	0.978503	0.956768	0.913087
K=16	0.993597	0.966748	0.980369	0.864183
K=16	0.982424	0.950552	0.954546	0.892447
K=16	0.947879	0.930757	0.946608	0.854626
K=16	0.958534	0.93905	0.953939	0.931661
K=16	0.962169	0.960404	0.978523	0.886364
K=16	0.97599	0.973129	0.945913	0.917767
K=16	0.968254	0.931209	0.910964	0.936997
K=16	0.968582	0.9446	0.940202	0.901771
K=16	0.993421	0.946	0.962865	0.940016
K=16	0.994458	0.951856	0.938101	0.868948
K=16	0.99026	0.962465	0.957532	0.887189
K=16	0.980208	0.944104	0.937198	0.882389
K=16	0.982171	0.920202	0.95206	0.894945
K=16	0.969196	0.952381	0.964976	0.935568
K=16	0.983696	0.965986	0.970954	0.901212
K=16	0.969788	0.952899	0.9334	0.89899
K=16	0.9742	0.932003	0.936576	0.940304
K=16	0.987319	0.946023	0.966947	0.939616
K=16	0.97708	0.950886	0.982766	0.94125
K=16	0.991024	0.943237	0.948283	0.9476
K=16	0.948283	0.965517	0.947572	0.937991
K=16	0.98404	0.970152	0.933093	0.937585
K=16	0.986667	0.964822	0.954951	0.899837
K=16	0.989383	0.937784	0.987273	0.921699
K=16	0.95206	0.946114	0.907589	0.942677
K=16	0.996387	0.922685	0.987692	0.891426
K=16	0.992224	0.935758	0.953704	0.906263
K=16	0.985577	0.979596	0.9754	0.915833
K=16	0.981295	0.959167	0.892311	0.917817
K=16	0.942029	0.910564	0.971667	0.925389
K=16	0.981683	0.95875	0.9844	0.931562
K=16	0.977254	0.958583	0.951111	0.936166
K=16	0.981132	0.929487	0.925	0.935833
K=16	0.945019	0.945604	0.94371	0.959341
K=16	0.964901	0.96043	0.961956	0.889956
K=16	0.981905	0.931361	0.95038	0.908889
K=16	0.958736	0.947662	0.937575	0.927879
K=16	0.977364	0.963636	0.944805	0.941657
K=16	0.966518	0.91798	0.961648	0.959201
K=16	0.971686	0.956522	0.965982	0.918968
K=16	0.956242	0.894278	0.948317	0.96256
K=16	0.970925	0.950393	0.947263	0.944308
K=16	0.985507	0.901361	0.968988	0.920555
K=16	0.972702	0.949678	0.959812	0.914933
K=16	0.987413	0.9392	0.948255	0.923707
K=16	0.971875	0.924113	0.9194	0.924328
K=16	0.966112	0.952792	0.966721	0.8875
K=16	0.951723	0.929697	0.961648	0.90616
K=16	0.960202	0.94202	0.951648	0.947292
K=16	0.966952	0.94159	0.96202	0.935697
K=16	0.954584	0.95773	0.941818	0.870593
K=16	0.978462	0.965545	0.97772	0.875417
K=16	0.984084	0.942308	0.961585	0.940104
K=16	0.95839	0.916051	0.965545	0.949477
K=16	0.9874	0.965195	0.942626	0.943438
K=16	0.971313	0.921667	0.9336	0.91727
K=16	0.989813	0.949152	0.935758	0.955384
K=16	0.996989	0.940304	0.948214	0.88909
K=16	0.953181	0.951781	0.96274	0.931754
K=16	0.988132	0.9642	0.939529	0.910241
K=16	0.959454	0.926745	0.960384	0.884384
K=16	0.988527	0.964655	0.947611	0.914614
K=16	0.985194	0.939935	0.95414	0.860893
K=16	0.963001	0.95716	0.948873	0.936757
K=16	0.985516	0.95653	0.93625	0.938333
K=16	0.9828	0.967684	0.978591	0.904375
K=16	0.9694	0.91266	0.954951	0.965986
K=16	0.967949	0.970624	0.965051	0.939976
K=16	0.982424	0.946055	0.936371	0.950879
K=16	0.979804	0.9375	0.963465	0.924316
K=16	0.980035	0.951581	0.960257	0.948255
K=16	0.9762	0.977564	0.956983	0.925731
K=16	0.953939	0.918881	0.928771	0.946615
K=16	0.976132	0.980808	0.950632	0.926535
K=16	0.981593	0.896234	0.978322	0.9286
K=16	0.9862	0.960024	0.970779	0.937802
K=16	0.97348	0.954182	0.908069	0.981771
K=16	0.975403	0.958128	0.970707	0.957995
K=16	0.980722	0.933494	0.94721	0.939082
K=16	0.963956	0.95471	0.968687	0.90625
K=16	0.985945	0.966184	0.963125	0.965676
K=16	0.964944	0.940376	0.931891	0.936371
K=16	0.992972	0.960658	0.936108	0.946457
K=16	0.983193	0.960145	0.952524	0.94798
K=16	0.981482	0.978182	0.9723	0.922619
K=16	0.978376	0.951322	0.931562	0.908785
K=16	0.985796	0.947706	0.930288	0.933962
K=16	0.94898	0.950625	0.972756	0.89822
K=16	0.996394	0.9394	0.944444	0.97623
K=16	0.985548	0.917363	0.967071	0.933125
K=16	0.971997	0.969002	0.970029	0.929495
K=16	0.964242	0.946018	0.948013	0.971417
K=16	0.949472	0.921699	0.929087	0.918401
K=16	0.976562	0.946944	0.935758	0.946979
K=16	0.956783	0.9482	0.933796	0.818948
K=16	0.962	0.955023	0.929723	0.939798
K=16	0.951489	0.936498	0.978562	0.940544
K=16	0.987964	0.97539	0.967549	0.937094
K=16	0.967475	0.937375	0.95653	0.923707
K=16	0.969375	0.941153	0.98062	0.894499
K=16	0.977091	0.938808	0.937099	0.912965
K=16	0.991173	0.9494	0.94847	0.939887
K=16	0.952524	0.944992	0.947776	0.910553
K=16	0.961818	0.937575	0.937603	0.956387
K=16	0.981844	0.934179	0.92493	0.89142
K=16	0.946379	0.974343	0.933173	0.879207
K=16	0.97708	0.917869	0.975644	0.912689
K=16	0.983912	0.930149	0.941458	0.937292
K=16	0.947263	0.966747	0.971698	0.932882
K=16	0.987957	0.929688	0.954728	0.9256
K=16	0.989734	0.918306	0.955833	0.904506
K=16	0.976162	0.959184	0.976114	0.908687
K=16	0.955929	0.93125	0.932166	0.894621
K=16	0.974548	0.918968	0.934109	0.879909
K=16	0.974754	0.918514	0.967014	0.879665
K=16	0.964286	0.972625	0.972389	0.903636
K=16	0.942323	0.972189	0.957983	0.917167
K=16	0.983942	0.913849	0.955515	0.934375
K=16	0.9718	0.9444	0.929146	0.894558
K=16	0.9586	0.942487	0.970988	0.913766
K=16	0.957647	0.967884	0.9716	0.896835
[truncated: 4,003 more rows]

## Sheet: Boot_DBP_AUC
Result	SD=5	SD=10	SD=15	SD=20
K=16	0.999799	0.983464	0.954546	0.954304
K=16	0.998595	0.973214	0.9836	0.909273
K=16	0.999597	0.985455	0.9868	0.9456
K=16	0.998199	0.983542	0.991024	0.847701
K=16	0.996578	0.979537	0.95773	0.924242
K=16	0.999	0.983884	0.953301	0.89899
K=16	0.99618	0.986905	0.974576	0.896981
K=16	0.996693	0.981604	0.9718	0.801721
K=16	0.998572	0.96757	0.9742	0.882176
K=16	0.999179	0.99125	0.97604	0.950221
K=16	0.997537	0.9792	0.988796	0.890864
K=16	1	0.98399	0.952672	0.9586
K=16	0.998783	0.988846	0.971589	0.871795
K=16	0.999596	0.98281	0.982336	0.898237
K=16	0.998346	0.96303	0.953342	0.911058
K=16	0.994163	0.968599	0.918679	0.905253
K=16	1	0.975112	0.965786	0.9166
K=16	0.997199	0.992788	0.951288	0.911873
K=16	0.997917	0.987598	0.986465	0.934253
K=16	0.997792	0.985176	0.956119	0.9616
K=16	0.998193	0.980244	0.979469	0.854469
K=16	0.99959	0.980329	0.962222	0.887395
K=16	0.9998	0.970713	0.967549	0.945833
K=16	0.997179	0.978962	0.979475	0.932971
K=16	0.998599	0.990148	0.943333	0.898234
K=16	0.998796	0.973933	0.972256	0.920112
K=16	1	0.977	0.954928	0.9188
K=16	0.999399	0.989792	0.954182	0.879437
K=16	0.996599	0.971032	0.961755	0.917735
K=16	1	0.982708	0.96875	0.938629
K=16	0.9994	0.985288	0.952781	0.940821
K=16	0.995598	0.952516	0.9836	0.835136
K=16	0.996599	0.995166	0.962588	0.9219
K=16	0.9994	0.956119	0.96274	0.917468
K=16	0.999399	0.973939	0.971618	0.8724
K=16	0.997199	0.968125	0.961338	0.880404
K=16	0.996328	0.965688	0.976643	0.9548
K=16	1	0.993316	0.92375	0.950721
K=16	1	0.984984	0.945859	0.902299
K=16	0.994048	0.991859	0.971899	0.913849
K=16	0.997199	0.986111	0.97476	0.967787
K=16	0.998333	0.975807	0.962185	0.8412
K=16	1	0.97552	0.9742	0.937297
K=16	0.996144	0.9716	0.951626	0.933239
K=16	0.998799	0.982537	0.979392	0.919768
K=16	0.995598	0.983293	0.943434	0.916901
K=16	0.991432	0.974704	0.957582	0.918908
K=16	1	0.982954	0.941425	0.923123
K=16	0.998796	0.964844	0.962264	0.926357
K=16	0.998164	0.967735	0.968687	0.893758
K=16	0.99958	0.983269	0.967884	0.902961
K=16	0.998384	0.981961	0.975561	0.920208
K=16	0.999391	0.97375	0.962794	0.925933
K=16	0.999792	0.977292	0.983258	0.916667
K=16	0.997591	0.970833	0.980168	0.91727
K=16	0.993389	0.97599	0.915865	0.921168
K=16	0.999599	0.9775	0.98336	0.929087
K=16	0.99596	0.959281	0.970505	0.934792
K=16	0.9996	0.990338	0.973958	0.956583
K=16	0.996995	0.992764	0.95544	0.882979
K=16	0.994956	0.984704	0.96736	0.908414
K=16	0.999599	0.971686	0.967587	0.91246
K=16	0.990796	0.990764	0.972808	0.886972
K=16	0.997396	0.967159	0.953896	0.948946
K=16	0.997855	0.984984	0.971476	0.920313
K=16	0.996347	0.986536	0.969691	0.862945
K=16	0.995998	0.983942	0.965186	0.902778
K=16	0.995797	0.973589	0.976591	0.924647
K=16	0.99618	0.993021	0.944511	0.93055
K=16	0.997199	0.9872	0.957976	0.901771
K=16	1	0.99033	0.9706	0.902285
K=16	0.998572	0.97756	0.964874	0.915166
K=16	0.99625	0.961749	0.980114	0.910427
K=16	0.9998	0.985837	0.978966	0.879583
K=16	0.997599	0.980571	0.9571	0.865146
K=16	1	0.98123	0.966112	0.892121
K=16	0.99236	0.98752	0.986111	0.926339
K=16	1	0.993695	0.962941	0.879233
K=16	0.999159	0.966363	0.970033	0.927371
K=16	0.996399	0.990026	0.954911	0.879
K=16	0.995716	0.958247	0.954911	0.867273
K=16	1	0.963677	0.980792	0.950823
K=16	0.996768	0.987475	0.963474	0.8636
K=16	0.998397	0.982598	0.978391	0.925121
K=16	0.999583	0.962891	0.972085	0.91226
K=16	1	0.977564	0.974709	0.924583
K=16	1	0.958182	0.934364	0.916063
K=16	0.9964	0.976744	0.974436	0.888021
K=16	0.998796	0.984447	0.971354	0.811699
K=16	1	0.985594	0.954382	0.90625
K=16	0.99958	0.98164	0.982222	0.942577
K=16	0.999199	0.992492	0.981458	0.89697
K=16	0.995785	0.971257	0.967147	0.906453
K=16	0.999596	0.987964	0.960749	0.952027
K=16	0.997426	0.99752	0.967995	0.917778
K=16	1	0.97933	0.990596	0.920873
K=16	0.999799	0.992656	0.973229	0.848053
K=16	0.996753	0.971667	0.95845	0.87575
K=16	0.994724	0.975361	0.9643	0.86876
K=16	1	0.976562	0.971989	0.909673
K=16	1	0.985243	0.972868	0.902577
K=16	0.997742	0.972403	0.9576	0.929586
K=16	0.999391	0.973229	0.97504	0.895032
K=16	0.99694	0.989177	0.971698	0.920768
K=16	0.997898	0.976852	0.978523	0.926683
K=16	0.994458	0.982993	0.98202	0.873998
K=16	0.998792	0.979167	0.946839	0.933958
K=16	1	0.9752	0.937099	0.881899
K=16	0.995739	0.973888	0.973357	0.896226
K=16	0.998384	0.994375	0.94978	0.926971
K=16	1	0.984498	0.962385	0.890298
K=16	0.994696	0.986351	0.985222	0.9224
K=16	1	0.990505	0.976047	0.942977
K=16	0.992695	0.965186	0.95058	0.89625
K=16	0.99513	0.966952	0.957447	0.934564
K=16	0.996753	0.975985	0.980128	0.940138
K=16	0.997933	0.988839	0.972756	0.925926
K=16	0.994696	0.971919	0.964786	0.954928
K=16	0.99697	0.977722	0.979968	0.887801
K=16	1	0.976429	0.974359	0.920673
K=16	0.996599	0.939529	0.970411	0.92513
K=16	0.994724	0.982361	0.95633	0.936364
K=16	1	0.979267	0.958128	0.916166
K=16	0.999599	0.977356	0.97459	0.92814
K=16	0.998182	0.98358	0.945178	0.903583
K=16	0.998199	0.981952	0.957732	0.895556
K=16	0.996753	0.96	0.992083	0.92212
K=16	0.997537	0.981982	0.959608	0.885817
K=16	0.999184	0.976868	0.964242	0.939904
K=16	0.999597	0.976806	0.973047	0.8796
K=16	0.99959	0.992086	0.967938	0.896667
K=16	0.993592	0.98	0.948592	0.937174
K=16	0.99719	0.964786	0.937906	0.882553
K=16	0.998399	0.989121	0.968587	0.918767
K=16	0.998368	0.984556	0.9848	0.889841
K=16	0.995039	0.970996	0.94958	0.912338
K=16	0.999597	0.9784	0.946206	0.864
K=16	1	0.97855	0.96106	0.922969
K=16	0.994583	0.990492	0.972527	0.89976
K=16	0.991797	0.979526	0.964744	0.871481
K=16	0.998798	0.967273	0.957576	0.873549
K=16	0.998595	0.969562	0.939192	0.951626
K=16	0.998998	0.967593	0.928342	0.943998
K=16	0.995994	0.970549	0.976458	0.884384
K=16	0.9994	0.96945	0.969691	0.909697
K=16	0.998799	0.988728	0.979066	0.925933
K=16	0.997688	0.965482	0.965097	0.936796
K=16	0.995895	0.99082	0.984578	0.929348
K=16	1	0.984292	0.960628	0.963185
K=16	0.999785	0.983607	0.970353	0.919686
K=16	1	0.991042	0.98334	0.903321
K=16	0.997596	0.973262	0.983193	0.929
K=16	0.994398	0.978784	0.991477	0.854677
K=16	0.998792	0.97504	0.955038	0.842391
K=16	0.995572	0.975196	0.937977	0.877003
K=16	0.999391	0.976405	0.962626	0.88285
K=16	0.99592	0.982346	0.977591	0.885266
K=16	1	0.973336	0.976806	0.942107
K=16	0.998788	0.9949	0.95818	0.850761
K=16	0.998595	0.99045	0.9643	0.907609
K=16	0.999798	0.985294	0.972902	0.880552
K=16	0.994591	0.979421	0.971015	0.847021
K=16	0.986869	0.984291	0.979394	0.869191
K=16	0.997993	0.955193	0.947179	0.857143
K=16	0.998542	0.982936	0.9738	0.918076
K=16	0.997599	0.984295	0.980569	0.919192
K=16	0.9974	0.978503	0.969203	0.927571
K=16	0.997584	0.975196	0.976991	0.927571
K=16	0.996387	0.979192	0.966749	0.900966
K=16	1	0.971476	0.974959	0.870148
K=16	0.999195	0.978503	0.969351	0.916466
K=16	0.994253	0.979475	0.959984	0.939211
K=16	0.995593	0.993799	0.978566	0.951087
K=16	0.995798	0.961604	0.971644	0.9204
K=16	0.997058	0.977648	0.97375	0.874749
K=16	0.9994	0.966184	0.984344	0.924113
K=16	0.998994	0.964583	0.966787	0.926883
K=16	1	0.960503	0.946095	0.904848
K=16	1	0.977422	0.949619	0.886018
K=16	1	0.959227	0.956321	0.9646
K=16	1	0.974779	0.931773	0.9278
K=16	0.99899	0.97479	0.9723	0.930505
K=16	0.995333	0.959394	0.970505	0.922877
K=16	0.9988	0.9922	0.9904	0.897172
K=16	0.998384	0.973129	0.979804	0.9164
K=16	0.995169	0.996981	0.9586	0.929383
K=16	0.9948	0.984375	0.966947	0.856737
K=16	1	0.998174	0.961939	0.92637
K=16	0.997576	0.9824	0.964673	0.941761
K=16	0.997987	0.969967	0.965833	0.916499
K=16	1	0.964127	0.981414	0.914864
K=16	0.9988	0.987179	0.950221	0.93438
K=16	1	0.982222	0.952181	0.910917
K=16	0.999197	0.976664	0.952981	0.860297
K=16	1	0.969807	0.963068	0.849899
K=16	0.997313	0.98266	0.9532	0.9016
K=16	0.998783	0.975575	0.976763	0.9328
K=16	0.997576	0.985507	0.971189	0.919485
K=16	0.996637	0.98125	0.9534	0.855932
K=16	1	0.953559	0.95818	0.96106
K=16	0.99569	0.977292	0.987148	0.919829
K=16	0.996981	0.990796	0.960346	0.952516
K=16	0.998768	0.978917	0.973558	0.908405
K=16	0.999777	0.991174	0.953905	0.885146
K=16	0.999195	0.973939	0.937906	0.896165
K=16	0.998579	0.982828	0.955936	0.913535
K=16	0.996458	0.982917	0.9686	0.887273
K=16	0.997799	0.990208	0.952997	0.895958
K=16	0.998394	0.985222	0.959213	0.909266
K=16	0.99876	0.960404	0.968387	0.863729
K=16	0.998595	0.961585	0.97182	0.945604
K=16	1	0.960417	0.947979	0.923904
K=16	0.999799	0.987677	0.981616	0.902
K=16	1	0.974167	0.940304	0.888021
K=16	1	0.99026	0.959394	0.858892
K=16	0.99978	0.981117	0.986129	0.886364
K=16	0.999197	0.97399	0.946732	0.887555
K=16	0.998985	0.982864	0.958734	0.939024
K=16	0.996162	0.992013	0.946314	0.9092
K=16	0.997582	0.986842	0.953301	0.893029
K=16	1	0.980911	0.981132	0.917268
K=16	0.996387	0.983593	0.95104	0.971717
K=16	0.994521	0.99177	0.973333	0.882649
K=16	0.9992	0.966749	0.976763	0.926571
K=16	1	0.971644	0.974359	0.930489
K=16	0.999594	0.971034	0.972501	0.937808
K=16	1	0.98101	0.9586	0.885064
K=16	0.997987	0.980606	0.971417	0.851651
K=16	0.998397	0.97899	0.9614	0.928805
K=16	0.99876	0.973112	0.981884	0.897746
K=16	0.996753	0.965745	0.9714	0.967684
K=16	1	0.972199	0.967879	0.9458
K=16	0.99438	0.984911	0.980592	0.933173
K=16	0.997778	0.991919	0.965706	0.888555
K=16	0.998108	0.969	0.95263	0.939503
K=16	0.998394	0.966797	0.978287	0.922476
K=16	0.998377	0.983736	0.946457	0.906803
K=16	1	0.980369	0.972957	0.931955
K=16	1	0.978182	0.974709	0.900771
K=16	1	0.968803	0.954782	0.919283
K=16	0.995104	0.985594	0.980569	0.944511
K=16	0.9964	0.966721	0.962963	0.902047
K=16	0.998333	0.977858	0.973336	0.84395
K=16	0.99839	0.976315	0.944712	0.949319
K=16	0.997126	0.9878	0.98368	0.934659
K=16	0.999399	0.987	0.981414	0.915749
K=16	0.997599	0.974343	0.985455	0.87495
K=16	0.9992	0.981616	0.968788	0.930372
K=16	0.997196	0.960749	0.970411	0.859098
K=16	0.998798	0.955918	0.965097	0.87475
K=16	1	0.976671	0.974107	0.934546
K=16	0.999398	0.978261	0.954982	0.902424
K=16	1	0.987917	0.961184	0.900241
K=16	0.999587	0.980686	0.967587	0.923297
K=16	0.993939	0.970588	0.969622	0.952295
K=16	0.997993	0.995625	0.97806	0.913333
K=16	1	0.99566	0.95825	0.928886
K=16	0.9975	0.980208	0.953531	0.939904
K=16	0.995198	0.971789	0.959541	0.933939
K=16	0.997159	0.975833	0.960145	0.908046
K=16	0.997999	0.964241	0.964786	0.956119
K=16	0.997708	0.970588	0.977968	0.937575
K=16	0.995994	0.980925	0.967987	0.855519
K=16	0.999596	0.979469	0.986194	0.905162
K=16	0.998776	0.985531	0.966587	0.9066
K=16	0.997	0.972256	0.968391	0.961739
K=16	0.997182	0.984394	0.968349	0.915556
K=16	0.997348	0.973846	0.963001	0.914966
K=16	0.998302	0.990148	0.968547	0.919768
K=16	1	0.979792	0.965252	0.963942
K=16	0.996768	0.981527	0.9672	0.881953
K=16	0.995659	0.977152	0.984976	0.860606
K=16	0.999192	0.974375	0.930909	0.90625
K=16	1	0.98303	0.957589	0.922889
K=16	0.998783	0.977422	0.960808	0.932373
K=16	0.997898	0.973333	0.951827	0.940681
K=16	0.99876	0.971354	0.973758	0.908081
K=16	0.999199	0.97125	0.953125	0.911836
K=16	0.99839	0.975446	0.960257	0.889792
K=16	0.999399	0.973304	0.968349	0.890805
K=16	0.9964	0.981734	0.9682	0.869932
K=16	1	0.982598	0.9772	0.898182
K=16	0.992754	0.985625	0.975644	0.918707
K=16	0.9988	0.981232	0.97348	0.901245
K=16	0.998788	0.989167	0.947812	0.929392
K=16	1	0.988711	0.941176	0.926535
K=16	0.99796	0.970788	0.968085	0.95556
K=16	0.997196	0.988582	0.964386	0.907062
K=16	0.990463	0.985998	0.9736	0.89704
K=16	0.993978	0.951523	0.987319	0.936775
K=16	0.999363	0.981337	0.957374	0.929348
K=16	0.999798	0.988889	0.955113	0.929213
K=16	0.999188	0.994167	0.965275	0.86238
K=16	0.997182	0.972957	0.961648	0.922276
K=16	0.998572	0.969945	0.927941	0.893608
K=16	0.997591	0.986111	0.979792	0.842391
K=16	0.996387	0.972323	0.97619	0.947716
K=16	0.998384	0.980114	0.965706	0.892311
K=16	0.998595	0.971591	0.978391	0.880169
K=16	0.994391	0.980731	0.9796	0.926426
K=16	0.996483	0.98358	0.962056	0.9264
K=16	0.996795	0.971354	0.947179	0.921461
K=16	0.999599	0.993912	0.960658	0.891557
K=16	0.996599	0.982593	0.950221	0.96043
K=16	1	0.97439	0.944848	0.932156
K=16	0.9998	0.978376	0.974343	0.859294
K=16	0.997383	0.9758	0.977591	0.910478
K=16	0.996716	0.963208	0.959184	0.867879
K=16	1	0.94918	0.96719	0.870536
K=16	1	0.9676	0.9608	0.928944
K=16	0.9949	0.971627	0.965781	0.894621
K=16	1	0.979125	0.9698	0.865717
K=16	0.999597	0.980454	0.966987	0.922504
K=16	0.998563	0.99045	0.96875	0.907636
K=16	0.994781	0.96139	0.987677	0.875
K=16	0.999583	0.981191	0.974107	0.9032
K=16	0.998242	0.990785	0.970236	0.918019
K=16	0.996788	0.990137	0.958242	0.945002
K=16	0.993397	0.962677	0.967735	0.927
K=16	0.997426	0.973741	0.98738	0.925417
K=16	0.999599	0.979394	0.963067	0.949619
K=16	0.9996	0.987795	0.968085	0.922169
K=16	1	0.961461	0.95118	0.93263
K=16	0.998571	0.969765	0.972923	0.854141
K=16	0.999375	0.990338	0.968349	0.870548
K=16	0.995192	0.9898	0.97899	0.945604
K=16	1	0.97747	0.954782	0.83056
K=16	0.998792	0.981925	0.949819	0.960145
K=16	0.997391	0.959583	0.95564	0.924725
K=16	1	0.983871	0.967787	0.931554
K=16	0.99596	0.976362	0.978182	0.916288
K=16	0.999799	0.992766	0.965859	0.969388
K=16	1	0.982917	0.975512	0.946875
K=16	0.998776	0.956572	0.950886	0.922489
K=16	0.998199	0.981884	0.96254	0.940304
K=16	1	0.97399	0.961444	0.9582
K=16	0.989984	0.986715	0.964696	0.917693
K=16	0.997399	0.956282	0.98164	0.93617
K=16	1	0.966749	0.972256	0.906667
K=16	0.997802	0.969015	0.9804	0.912727
K=16	0.997565	0.968591	0.978261	0.941298
K=16	0.999788	0.972509	0.981935	0.934109
K=16	0.999592	0.972756	0.949819	0.865869
K=16	0.99375	0.976875	0.958784	0.889402
K=16	0.997383	0.97697	0.948579	0.840936
K=16	0.9996	0.985677	0.964696	0.942577
K=16	0.9998	0.978832	0.973737	0.87375
K=16	1	0.986453	0.978523	0.939192
K=16	0.997584	0.973524	0.96875	0.939704
K=16	0.997196	0.984098	0.974569	0.904627
K=16	0.997993	0.978962	0.971789	0.886993
K=16	0.9978	0.971774	0.978376	0.88921
K=16	0.997778	0.979823	0.967391	0.912485
K=16	0.996753	0.989583	0.97	0.895292
K=16	1	0.976867	0.943438	0.944912
K=16	0.998698	0.989824	0.989252	0.853859
K=16	0.998698	0.984809	0.9828	0.952524
K=16	0.996995	0.977263	0.962185	0.915258
K=16	1	0.957083	0.961184	0.920628
K=16	0.994191	0.978287	0.978365	0.913766
K=16	0.996981	0.980931	0.967787	0.878606
K=16	0.994565	0.949408	0.9552	0.864545
K=16	0.997552	0.976948	0.981042	0.894886
K=16	1	0.961939	0.975164	0.892512
K=16	0.99697	0.981132	0.970954	0.909017
K=16	1	0.97517	0.97504	0.94918
K=16	0.99569	0.964691	0.956924	0.897142
K=16	0.996956	0.976336	0.960606	0.865565
K=16	0.994748	0.980769	0.93884	0.917302
K=16	0.995308	0.971476	0.956897	0.931353
K=16	0.999798	0.992424	0.981993	0.903784
K=16	0.9984	0.985738	0.960808	0.941425
K=16	0.9964	0.992707	0.967127	0.895733
K=16	0.997971	0.975952	0.986272	0.962256
K=16	0.999799	0.983234	0.943237	0.881574
K=16	0.997083	0.987988	0.9508	0.891437
K=16	0.997576	0.983607	0.976382	0.935897
K=16	0.999599	0.979125	0.982572	0.899752
K=16	0.999396	0.97798	0.977364	0.863145
K=16	0.996588	0.984299	0.962063	0.925322
K=16	0.999394	0.980695	0.980329	0.940755
K=16	0.994956	0.97479	0.9721	0.837374
K=16	1	0.971354	0.975244	0.928397
K=16	0.997999	0.990968	0.984375	0.92488
K=16	1	0.989562	0.930505	0.846216
K=16	0.996007	0.956169	0.965986	0.941458
K=16	0.997599	0.97437	0.97559	0.927656
K=16	0.997348	0.972606	0.948686	0.929549
K=16	0.998399	0.985843	0.951288	0.960184
K=16	0.9996	0.976671	0.988372	0.927335
K=16	0.996532	0.962436	0.977576	0.8798
K=16	1	0.982193	0.9652	0.913131
K=16	0.998346	0.97517	0.980769	0.918968
K=16	0.999159	0.9775	0.960784	0.917817
K=16	0.994792	0.977576	0.976258	0.917411
K=16	1	0.977991	0.965909	0.899351
K=16	0.998591	0.980329	0.982993	0.899132
K=16	0.991787	0.974783	0.978565	0.896981
K=16	0.999197	0.996962	0.982891	0.891269
K=16	0.997997	0.961353	0.963365	0.941616
K=16	0.999384	0.971683	0.954509	0.906263
K=16	0.995974	0.989091	0.959541	0.951827
K=16	0.999587	0.98674	0.962385	0.885954
K=16	0.996981	0.976443	0.960384	0.823688
K=16	0.997599	0.984172	0.950921	0.926171
K=16	0.999587	0.983293	0.980192	0.957576
K=16	0.999594	0.992397	0.96875	0.954434
K=16	0.999167	0.96044	0.95156	0.867605
K=16	0.995998	0.982198	0.956566	0.898434
K=16	0.99839	0.985837	0.955182	0.889292
K=16	0.9994	0.99179	0.955982	0.940341
K=16	0.997997	0.983068	0.975649	0.9494
K=16	0.999188	0.980008	0.982537	0.870756
K=16	0.995798	0.978171	0.963468	0.92404
K=16	0.999167	0.978141	0.948816	0.927371
K=16	0.998598	0.985837	0.958937	0.882212
K=16	0.997971	0.95034	0.976114	0.938976
K=16	0.997796	0.96202	0.968889	0.855
K=16	0.997613	0.970313	0.974359	0.889433
K=16	0.997332	0.985294	0.962785	0.933939
K=16	0.999576	0.971589	0.970553	0.926328
K=16	0.997999	0.970649	0.956387	0.909876
K=16	0.996387	0.986579	0.983774	0.89963
K=16	0.997599	0.941298	0.964573	0.963067
K=16	0.9992	0.993	0.981393	0.924725
K=16	1	0.979583	0.979727	0.916567
K=16	0.998799	0.979469	0.956778	0.905394
K=16	0.994565	0.985594	0.962941	0.937901
K=16	0.999195	0.987179	0.958133	0.878586
K=16	0.996387	0.991979	0.981593	0.911875
K=16	0.995773	0.988791	0.984375	0.89596
K=16	0.992766	0.984172	0.957933	0.929
K=16	0.992197	0.979647	0.9756	0.911883
K=16	0.999398	0.980874	0.979167	0.915137
K=16	0.998598	0.992351	0.965781	0.92665
K=16	0.997742	0.973888	0.962465	0.858374
K=16	0.996788	0.964722	0.960658	0.94958
K=16	0.996394	0.959213	0.948119	0.89723
K=16	1	0.971354	0.926519	0.875403
K=16	0.9984	0.983944	0.978365	0.889956
K=16	1	0.984811	0.976391	0.935174
K=16	0.99798	0.987825	0.94938	0.934174
K=16	1	0.982843	0.927151	0.93899
K=16	1	0.965586	0.956897	0.908687
K=16	0.995484	0.982017	0.953381	0.899375
K=16	0.998998	0.964615	0.95118	0.87155
K=16	0.997144	0.967692	0.970494	0.95742
K=16	0.996377	0.966458	0.961939	0.876355
K=16	0.996995	0.980274	0.976248	0.951856
K=16	0.997999	0.975713	0.979968	0.885455
K=16	1	0.966893	0.956364	0.954582
K=16	1	0.963964	0.9684	0.9044
K=16	1	0.973389	0.978784	0.9478
K=16	0.998125	0.990396	0.974638	0.9052
K=16	1	0.98117	0.954527	0.827615
K=16	0.999199	0.959583	0.982626	0.878964
K=16	1	0.986667	0.965116	0.894343
K=16	0.998739	0.982844	0.985394	0.90285
K=16	0.996956	0.970895	0.941818	0.8928
K=16	0.999796	0.988631	0.978983	0.917282
K=16	0.999597	0.95946	0.954106	0.909455
K=16	1	0.95145	0.951522	0.931965
K=16	0.997799	0.981875	0.96736	0.868283
K=16	1	0.989665	0.969752	0.954928
K=16	0.999121	0.984194	0.964692	0.932068
K=16	0.997999	0.971717	0.977576	0.940885
K=16	0.9982	0.978297	0.97599	0.926282
K=16	0.9998	0.999388	0.951515	0.908155
K=16	0.998599	0.985288	0.961585	0.854968
K=16	0.996989	0.993565	0.957665	0.936298
K=16	1	0.9732	0.977053	0.976
K=16	0.999341	0.970293	0.967147	0.927885
K=16	0.999799	0.983289	0.984299	0.920156
K=16	0.995393	0.964491	0.977564	0.920673
K=16	1	0.987013	0.9875	0.907853
K=16	0.999798	0.965686	0.980208	0.863117
K=16	0.99958	0.986111	0.967156	0.905058
K=16	0.999596	0.984903	0.968283	0.93898
K=16	0.996995	0.978376	0.963768	0.869148
K=16	0.989167	0.967844	0.978784	0.902489
K=16	0.99388	0.972115	0.948087	0.950823
K=16	0.999599	0.980326	0.963785	0.92505
K=16	0.997971	0.973823	0.945513	0.876602
K=16	0.9978	0.978387	0.962063	0.928283
K=16	0.998188	0.972329	0.954728	0.902244
K=16	0.995593	0.960103	0.949	0.886792
K=16	0.99959	0.953407	0.962	0.931717
K=16	0.99796	0.977504	0.980592	0.871795
K=16	0.9998	0.984904	0.969588	0.92086
K=16	0.998788	0.986607	0.969156	0.905859
K=16	0.998197	0.9694	0.964944	0.893669
K=16	0.997997	0.968988	0.97599	0.873792
K=16	1	0.975403	0.96875	0.896104
K=16	0.999592	0.96072	0.962464	0.898033
K=16	0.998199	0.985427	0.979192	0.889556
K=16	0.998579	0.979837	0.984501	0.91727
K=16	0.996578	0.973626	0.940376	0.934974
K=16	0.9988	0.945312	0.970553	0.890249
K=16	0.997947	0.994792	0.971717	0.905455
K=16	0.998586	0.970293	0.974508	0.904992
K=16	0.997756	0.985194	0.937901	0.883232
K=16	0.994423	0.988372	0.967879	0.936987
K=16	0.99875	0.980454	0.963474	0.902917
K=16	0.997778	0.987592	0.969588	0.946256
K=16	0.998164	0.96274	0.924556	0.954509
K=16	0.996394	0.978663	0.953982	0.912929
K=16	0.998394	0.97855	0.9638	0.921168
K=16	0.998368	0.968391	0.983092	0.954837
K=16	0.995756	0.989392	0.953284	0.930481
K=16	1	0.979195	0.979505	0.9248
K=16	0.998579	0.977917	0.984544	0.915094
K=16	0.99938	0.993432	0.9406	0.945778
K=16	0.9969	0.976868	0.942308	0.936162
K=16	0.998193	0.990666	0.954382	0.89694
K=16	0.995066	0.955665	0.9642	0.8776
K=16	1	0.982418	0.977422	0.92537
K=16	0.991511	0.984295	0.945302	0.921274
K=16	0.996305	0.973357	0.988485	0.941907
K=16	0.994748	0.96385	0.936393	0.896
K=16	0.999596	0.988115	0.977778	0.9352
K=16	1	0.969807	0.986995	0.912965
K=16	0.997778	0.973958	0.989964	0.919168
K=16	0.999798	0.977083	0.964822	0.931006
K=16	1	0.957576	0.951723	0.868948
K=16	1	0.97809	0.965745	0.947071
K=16	0.995593	0.994792	0.953535	0.879702
K=16	0.99899	0.981527	0.97697	0.909273
K=16	1	0.959821	0.96404	0.9724
K=16	0.998783	0.97326	0.978	0.917
K=16	0.995584	0.977364	0.948081	0.930372
K=16	0.999799	0.967708	0.967587	0.954951
K=16	0.997584	0.965495	0.971997	0.915459
K=16	0.99875	0.980364	0.974779	0.913131
K=16	0.995985	0.982857	0.940271	0.878806
K=16	0.997599	0.979269	0.969952	0.939326
K=16	0.995793	0.984237	0.970954	0.855353
K=16	0.995192	0.951024	0.984444	0.921769
K=16	0.997708	0.957568	0.954127	0.908482
K=16	1	0.985677	0.9554	0.920454
K=16	0.99937	0.989936	0.959541	0.899038
K=16	0.999396	0.9847	0.987013	0.94998
K=16	0.999384	0.971848	0.991432	0.944
K=16	0.997	0.98876	0.986795	0.907467
K=16	1	0.982171	0.952581	0.947379
K=16	0.9984	0.981339	0.9608	0.915152
K=16	0.996377	0.965895	0.979928	0.905455
K=16	0.999396	0.96829	0.9222	0.966146
K=16	0.999197	0.979125	0.9582	0.89922
K=16	0.998792	0.985945	0.948718	0.935774
K=16	0.996875	0.978141	0.970152	0.952381
K=16	0.998394	0.981988	0.961338	0.91405
K=16	1	0.972083	0.961184	0.885354
K=16	0.999188	0.979475	0.968587	0.9184
K=16	0.998796	0.978365	0.984344	0.9196
K=16	0.9996	0.955813	0.982171	0.904829
K=16	0.997391	0.984994	0.989332	0.934095
K=16	1	0.980202	0.984088	0.959742
K=16	0.999398	0.994318	0.979	0.929688
K=16	1	0.966315	0.944199	0.929487
K=16	0.999792	0.973896	0.967564	0.881153
K=16	0.997584	0.982638	0.979326	0.8468
K=16	0.993676	0.992417	0.97578	0.975962
K=16	0.9988	0.98802	0.974141	0.942593
K=16	0.999142	0.980416	0.977456	0.917102
K=16	1	0.979403	0.985548	0.933159
K=16	0.996387	0.979596	0.9808	0.917472
K=16	0.99783	0.981028	0.968169	0.894621
K=16	0.99719	0.981061	0.976591	0.8868
K=16	0.996795	0.987419	0.9748	0.892289
K=16	1	0.984994	0.970753	0.888136
K=16	0.9996	0.979384	0.97967	0.86181
K=16	0.996532	0.972423	0.958788	0.884444
K=16	1	0.992405	0.970612	0.884167
K=16	0.994288	0.986043	0.948269	0.903161
K=16	0.9998	0.979194	0.964696	0.884945
K=16	0.995716	0.986378	0.937575	0.924479
K=16	0.999375	0.979839	0.967147	0.92517
K=16	0.993064	0.980416	0.967884	0.947083
K=16	0.999793	0.978586	0.978084	0.875609
K=16	0.997987	0.974689	0.977576	0.92404
K=16	0.996981	0.975164	0.948892	0.903784
K=16	0.998798	0.982759	0.9718	0.947979
K=16	0.993912	0.987795	0.971354	0.942633
K=16	0.995985	0.961141	0.9524	0.950989
K=16	0.999394	0.99125	0.984143	0.906199
K=16	0.999179	0.976364	0.977152	0.924056
K=16	0.991587	0.971206	0.974307	0.90024
K=16	1	0.985919	0.98334	0.882724
K=16	0.992086	0.976258	0.9486	0.88121
K=16	1	0.986978	0.977832	0.919168
K=16	1	0.969691	0.983793	0.903
K=16	0.9975	0.97539	0.960633	0.856768
K=16	0.994545	0.984401	0.961242	0.927151
K=16	0.995	0.9571	0.97437	0.884
K=16	0.998799	0.987556	0.973958	0.904857
K=16	0.9998	0.972525	0.946407	0.942292
K=16	1	0.988932	0.96226	0.952581
K=16	1	0.984	0.979367	0.909054
K=16	0.997565	0.978141	0.964444	0.885353
K=16	0.998799	0.971042	0.979269	0.88057
K=16	0.999384	0.984375	0.96855	0.896234
K=16	0.997199	0.979384	0.987708	0.862745
K=16	0.998595	0.97685	0.975361	0.933701
K=16	1	0.987691	0.977152	0.9384
K=16	1	0.98758	0.978896	0.927677
K=16	1	0.989245	0.978992	0.913737
K=16	0.991379	0.987013	0.984811	0.898559
K=16	0.998	0.976601	0.950521	0.933237
K=16	0.998399	0.985833	0.958586	0.85899
K=16	0.998599	0.967677	0.970909	0.853365
K=16	0.997391	0.9698	0.964586	0.942508
K=16	0.9922	0.96949	0.970788	0.952516
K=16	0.991173	0.97578	0.939815	0.930354
K=16	1	0.986111	0.984994	0.917668
K=16	0.99798	0.975845	0.960067	0.927243
K=16	0.999785	0.976461	0.97519	0.944581
K=16	0.997739	0.988231	0.988782	0.910657
K=16	0.998174	0.9875	0.983393	0.959798
K=16	1	0.977512	0.939904	0.867588
K=16	0.991995	0.994968	0.958984	0.810096
K=16	0.996753	0.981553	0.970624	0.904362
K=16	0.997565	0.987825	0.960658	0.937603
K=16	1	0.983483	0.948255	0.918605
K=16	0.997313	0.967135	0.984299	0.910364
K=16	1	0.985949	0.967391	0.896859
K=16	0.997182	0.982143	0.971698	0.948796
K=16	0.996198	0.956845	0.968788	0.951923
K=16	0.999799	0.982828	0.982964	0.892241
K=16	0.9986	0.97188	0.966787	0.880152
K=16	1	0.9854	0.96256	0.928571
K=16	0.996328	0.979968	0.9856	0.921517
K=16	0.99839	0.980903	0.935588	0.938177
K=16	1	0.983593	0.957783	0.932568
K=16	0.998799	0.972389	0.962185	0.935897
K=16	0.997768	0.987292	0.975962	0.925532
K=16	0.997199	0.970553	0.981616	0.937099
K=16	0.997708	0.960808	0.969752	0.895833
K=16	0.99958	0.989245	0.962585	0.897431
K=16	0.9996	0.972085	0.938502	0.910964
K=16	0.997999	0.9706	0.967391	0.906763
K=16	1	0.983464	0.969606	0.913333
K=16	0.998108	0.964491	0.975443	0.857752
K=16	0.997106	0.972527	0.967387	0.92947
K=16	0.9996	0.966721	0.968187	0.880152
K=16	1	0.974548	0.969604	0.926134
K=16	0.999195	0.979167	0.950921	0.893518
K=16	0.9984	0.96328	0.948481	0.871347
K=16	0.997591	0.978924	0.951691	0.932166
K=16	1	0.990699	0.97496	0.901961
K=16	0.997565	0.986536	0.974159	0.94101
K=16	0.992197	0.980903	0.96736	0.91899
K=16	0.9954	0.970443	0.959792	0.905248
K=16	0.998788	0.979403	0.970895	0.89596
K=16	0.999592	0.964167	0.953834	0.905797
K=16	0.995398	0.982346	0.965144	0.90556
K=16	0.99959	0.987917	0.973939	0.909655
K=16	0.993939	0.977422	0.97798	0.954637
K=16	0.998399	0.973727	0.951322	0.901
K=16	0.997362	0.974792	0.966544	0.893263
K=16	0.994798	0.986875	0.965986	0.919071
K=16	1	0.988485	0.97419	0.889433
K=16	1	0.993333	0.971997	0.937099
K=16	0.999576	0.972906	0.955529	0.873535
K=16	0.992774	0.971899	0.961039	0.85568
K=16	0.998553	0.982766	0.961141	0.913288
K=16	0.9992	0.985	0.968788	0.888021
K=16	0.9992	0.987071	0.979708	0.885283
K=16	1	0.986579	0.946379	0.910106
K=16	0.998397	0.975165	0.953125	0.898001
K=16	0.999195	0.990666	0.945578	0.865662
K=16	0.99596	0.982813	0.9636	0.90076
K=16	0.999587	0.978766	0.951856	0.84725
K=16	1	0.96634	0.970624	0.965186
K=16	0.991987	0.984344	0.987923	0.9286
K=16	1	0.972096	0.966747	0.839192
K=16	0.998768	0.976515	0.9792	0.957007
K=16	0.996736	0.98303	0.968149	0.89697
K=16	0.994748	0.986201	0.968474	0.9594
K=16	0.9961	0.987825	0.952	0.89899
K=16	0.998698	0.992121	0.970588	0.903382
K=16	0.997196	0.992929	0.97476	0.907563
K=16	1	0.969196	0.956364	0.896042
K=16	0.997	0.989651	0.9586	0.864734
K=16	0.9976	0.984496	0.97517	0.914062
K=16	0.995942	0.979394	0.967548	0.9214
K=16	0.9992	0.98334	0.966546	0.926932
K=16	0.995785	0.970293	0.967071	0.943177
K=16	1	0.994748	0.969752	0.898438
K=16	0.994575	0.980392	0.96532	0.925933
K=16	0.999798	0.975208	0.954382	0.8918
K=16	0.99625	0.957568	0.996328	0.912238
K=16	0.997591	0.971313	0.969807	0.898635
K=16	0.999599	0.993407	0.967483	0.949204
K=16	0.999796	0.980911	0.9796	0.897035
K=16	0.991971	0.985118	0.971997	0.913689
K=16	0.996144	0.987419	0.977318	0.8982
K=16	0.999597	0.980404	0.980792	0.868389
K=16	1	0.97578	0.967787	0.917172
K=16	0.994006	0.988559	0.9578	0.866347
K=16	1	0.982964	0.983333	0.895961
K=16	0.988916	0.993506	0.965982	0.887879
K=16	0.9994	0.991797	0.971015	0.904762
K=16	0.994318	0.968596	0.965545	0.894945
K=16	0.998022	0.978038	0.952781	0.937174
K=16	0.998643	0.986795	0.953407	0.869148
K=16	0.998591	0.986453	0.961939	0.917874
K=16	0.997665	0.981112	0.969952	0.914164
K=16	0.996305	0.964775	0.961648	0.916566
K=16	1	0.977083	0.963498	0.921675
K=16	0.9996	0.990942	0.959798	0.843738
K=16	1	0.971848	0.986453	0.868189
K=16	0.99958	0.982939	0.969351	0.94351
K=16	1	0.964386	0.953692	0.929383
K=16	0.994766	0.984606	0.941425	0.896162
K=16	0.995866	0.974167	0.936192	0.894278
K=16	0.9996	0.98802	0.963185	0.863709
K=16	0.99796	0.985051	0.976651	0.917905
K=16	1	0.967348	0.986595	0.89984
K=16	0.996799	0.968547	0.990101	0.923324
K=16	0.995797	0.965275	0.966186	0.905797
K=16	0.999	0.965728	0.963073	0.908958
K=16	0.998799	0.953125	0.970988	0.883117
K=16	0.997933	0.982939	0.934	0.962185
K=16	0.996186	0.963073	0.944242	0.936973
K=16	0.9984	0.971429	0.988433	0.898559
K=16	0.995354	0.974109	0.977679	0.884183
K=16	0.99694	0.971589	0.958852	0.88141
K=16	0.996347	0.982939	0.962828	0.953432
K=16	0.994781	0.96945	0.969091	0.949275
K=16	0.999599	0.967735	0.977391	0.905058
K=16	1	0.980417	0.961338	0.878653
K=16	0.999199	0.992248	0.9808	0.949017
K=16	0.997576	0.982626	0.934174	0.900765
K=16	0.996921	0.987598	0.951522	0.890004
K=16	0.992388	0.986545	0.953526	0.903784
K=16	0.996956	0.9838	0.94938	0.918
K=16	0.9966	0.98194	0.961667	0.917208
K=16	0.998384	0.98375	0.979167	0.903653
K=16	0.998591	0.981193	0.959335	0.808237
K=16	1	0.985924	0.957045	0.8798
K=16	0.998384	0.970547	0.964573	0.920975
K=16	0.997792	0.989528	0.979871	0.8858
K=16	1	0.989734	0.97419	0.8426
K=16	1	0.978038	0.963785	0.9452
K=16	1	0.991747	0.980824	0.885761
K=16	0.999792	0.978966	0.953905	0.923729
K=16	1	0.980903	0.965909	0.9632
K=16	0.9988	0.989392	0.965982	0.918567
K=16	1	0.982048	0.962185	0.901847
K=16	0.997083	0.973543	0.955113	0.905962
K=16	1	0.96387	0.939616	0.922101
K=16	0.998384	0.985	0.948179	0.896337
K=16	1	0.982424	0.950282	0.856343
K=16	0.998563	0.968344	0.973505	0.9334
K=16	0.999195	0.99375	0.965252	0.908081
K=16	1	0.985749	0.954343	0.881811
K=16	1	0.975724	0.969404	0.948117
K=16	1	0.977677	0.977968	0.944378
K=16	0.998599	0.987148	0.97561	0.913565
K=16	0.994458	0.976029	0.945378	0.897636
K=16	1	0.987419	0.973589	0.933847
K=16	0.997565	0.980808	0.981333	0.9258
K=16	1	0.969952	0.984578	0.92377
K=16	0.998384	0.952516	0.9666	0.9432
K=16	0.992656	0.957545	0.982372	0.903452
K=16	0.999599	0.983563	0.940376	0.919887
K=16	1	0.986248	0.979768	0.905649
K=16	0.998394	0.979394	0.980128	0.947979
K=16	0.9998	0.973276	0.952324	0.926731
K=16	1	0.979823	0.973832	0.934949
K=16	1	0.991228	0.977591	0.9296
K=16	1	0.96634	0.955113	0.945253
K=16	0.997362	0.962175	0.959139	0.944042
K=16	0.995169	0.982175	0.9648	0.901442
K=16	0.996566	0.973832	0.949477	0.948718
K=16	0.999597	0.9766	0.960537	0.860377
K=16	0.998368	0.982828	0.972756	0.936572
K=16	0.9968	0.971388	0.952496	0.947457
K=16	0.993559	0.9745	0.9596	0.923092
K=16	0.998384	0.982346	0.959541	0.9392
K=16	0.999799	0.951111	0.959944	0.91174
K=16	1	0.979124	0.97476	0.9167
K=16	0.99592	0.971683	0.947516	0.896135
K=16	0.994724	0.963958	0.987071	0.919625
K=16	0.995974	0.978566	0.970612	0.904375
K=16	0.995512	0.97147	0.968141	0.9472
K=16	0.999192	0.976264	0.930757	0.946514
K=16	0.999799	0.980676	0.9528	0.916461
K=16	0.9996	0.980073	0.964986	0.889292
K=16	0.997792	0.985306	0.970209	0.93472
K=16	0.997997	0.97933	0.95742	0.951149
K=16	0.997584	0.982431	0.977053	0.935961
K=16	1	0.980571	0.972756	0.848727
K=16	0.995512	0.978917	0.952123	0.894481
K=16	0.998197	0.976991	0.968487	0.888622
K=16	1	0.966308	0.960386	0.921369
K=16	0.992323	0.974026	0.942323	0.905844
K=16	0.999184	0.964696	0.956768	0.924513
K=16	1	0.974163	0.9804	0.929293
K=16	0.998399	0.978243	0.974343	0.906465
K=16	0.99814	0.970624	0.962762	0.934847
K=16	0.996279	0.975644	0.942626	0.94179
K=16	0.997196	0.986979	0.973189	0.945578
K=16	0.99839	0.965417	0.9702	0.902961
K=16	0.996486	0.982193	0.965074	0.918767
K=16	0.993637	0.970209	0.965946	0.917115
K=16	0.997313	0.974149	0.983541	0.918222
K=16	0.994492	0.98368	0.953131	0.890004
K=16	1	0.970925	0.982939	0.904046
K=16	0.998199	0.977273	0.961538	0.920008
K=16	0.9976	0.995968	0.98336	0.909673
K=16	0.99752	0.974167	0.892857	0.936975
K=16	0.996716	0.9818	0.971997	0.916299
K=16	1	0.982964	0.959535	0.933239
K=16	1	0.942393	0.970209	0.9364
K=16	1	0.983068	0.982171	0.861745
K=16	0.998994	0.982017	0.964035	0.832923
K=16	0.999065	0.973542	0.943978	0.896566
K=16	1	0.973958	0.97596	0.911729
K=16	0.997742	0.973047	0.968	0.893921
K=16	1	0.983671	0.97552	0.917367
K=16	0.997997	0.9875	0.956778	0.9202
K=16	0.999596	0.977263	0.939616	0.921317
K=16	0.999587	0.989912	0.967187	0.911947
K=16	0.999375	0.985548	0.959855	0.86879
K=16	0.991971	0.96406	0.967949	0.926771
K=16	1	0.984375	0.972589	0.893921
K=16	0.9982	0.945	0.980984	0.875758
K=16	0.997726	0.985994	0.98117	0.943838
K=16	0.997537	0.986465	0.965252	0.886218
K=16	0.998346	0.984508	0.971515	0.928945
K=16	0.994179	0.970033	0.976	0.92775
K=16	0.999594	0.979823	0.964491	0.91
K=16	0.9986	0.969202	0.96404	0.866995
K=16	0.9949	0.973027	0.966136	0.936166
K=16	0.997537	0.974747	0.9738	0.912084
K=16	0.996347	0.9858	0.969615	0.949619
K=16	0.999394	0.9744	0.953633	0.899038
K=16	0.998394	0.979897	0.986263	0.883454
K=16	0.998181	0.977716	0.964271	0.9375
K=16	0.997565	0.974838	0.964976	0.928693
K=16	0.999599	0.97519	0.974359	0.84219
K=16	0.994724	0.961554	0.973389	0.959535
K=16	1	0.97476	0.9653	0.877951
K=16	1	0.988218	0.961242	0.847139
K=16	0.997332	0.986374	0.970576	0.930601
K=16	0.99625	0.962866	0.929287	0.891957
K=16	0.99798	0.983994	0.952228	0.936079
K=16	0.998397	0.983494	0.975604	0.913352
K=16	1	0.991787	0.9828	0.918628
K=16	0.997708	0.964396	0.950632	0.923092
K=16	1	0.976	0.945008	0.926519
K=16	0.9969	0.98202	0.9352	0.863598
K=16	0.997778	0.972509	0.982626	0.916166
K=16	0.995989	0.993432	0.939904	0.9316
K=16	0.994343	0.977648	0.94918	0.919071
K=16	0.9998	0.98368	0.963208	0.892525
K=16	0.998598	0.988485	0.976651	0.877013
K=16	0.998792	0.9847	0.96254	0.944978
K=16	0.997688	0.972329	0.9698	0.865508
K=16	0.998768	0.980212	0.930601	0.919013
K=16	0.997997	0.9864	0.965186	0.940217
K=16	0.998182	0.97562	0.973011	0.927963
K=16	0.995994	0.990505	0.988796	0.90076
K=16	0.989392	0.978865	0.968283	0.923511
K=16	0.999587	0.958333	0.9504	0.915137
K=16	0.996486	0.979727	0.969212	0.934934
K=16	0.9996	0.991386	0.972256	0.88125
K=16	0.999396	0.992559	0.970494	0.882497
K=16	0.997993	0.97968	0.971389	0.867086
K=16	0.9975	0.981734	0.944805	0.912037
K=16	0.989	0.959394	0.973589	0.9084
K=16	0.998108	0.97956	0.972189	0.91
K=16	1	0.984	0.964744	0.945203
K=16	0.996042	0.9814	0.965144	0.874748
K=16	0.9982	0.978765	0.98738	0.931034
K=16	0.99625	0.988527	0.976362	0.893872
K=16	0.998188	0.962028	0.981971	0.926171
K=16	0.999597	0.995074	0.984932	0.913383
K=16	0.999188	0.969652	0.9682	0.917567
K=16	0.996799	0.990505	0.986536	0.891157
K=16	0.99359	0.97491	0.985569	0.920808
K=16	0.993386	0.984341	0.973558	0.883553
K=16	0.999195	0.98336	0.963838	0.948
K=16	0.995484	0.966109	0.956364	0.892747
K=16	0.990365	0.980114	0.974229	0.939382
K=16	1	0.988971	0.985347	0.840928
K=16	0.99937	0.969002	0.973631	0.941399
K=16	1	0.967972	0.9848	0.882045
K=16	0.999195	0.977356	0.954235	0.87575
K=16	1	0.980778	0.9846	0.879407
K=16	1	0.965934	0.966	0.9116
K=16	0.998799	0.977477	0.979099	0.93599
K=16	0.99596	0.969203	0.977012	0.880352
K=16	0.993695	0.9496	0.966721	0.924
K=16	0.995584	0.9856	0.971789	0.949878
K=16	0.997083	0.972835	0.97516	0.914654
K=16	0.999799	0.979708	0.976651	0.909164
K=16	0.996399	0.980659	0.982593	0.919711
K=16	0.9972	0.984291	0.973336	0.926971
K=16	1	0.975852	0.973823	0.938717
K=16	0.9982	0.985455	0.962828	0.94918
K=16	0.991379	0.992552	0.976917	0.921
K=16	0.999797	0.9723	0.965877	0.954182
K=16	0.994982	0.969409	0.980208	0.938775
K=16	0.999799	0.98591	0.961818	0.939167
K=16	0.998394	0.9874	0.967564	0.928972
K=16	0.994591	0.984375	0.971096	0.803693
K=16	0.996347	0.977764	0.9812	0.937198
K=16	1	0.987692	0.971111	0.9022
K=16	0.99796	0.989601	0.966146	0.914321
K=16	1	0.984583	0.967794	0.930149
K=16	0.998377	0.955255	0.969196	0.92597
K=16	0.997199	0.982593	0.943125	0.902248
K=16	0.9982	0.983022	0.950422	0.902778
K=16	0.999524	0.982537	0.959135	0.877416
K=16	0.997029	0.978287	0.982143	0.934564
K=16	0.997144	0.971618	0.956566	0.932373
K=16	0.997396	0.988506	0.964944	0.961039
K=16	0.992352	0.992083	0.9584	0.906651
K=16	1	0.969409	0.942323	0.869348
K=16	0.995994	0.984911	0.97599	0.91375
K=16	0.997576	0.981117	0.964894	0.915766
K=16	0.995119	0.963208	0.96895	0.915366
K=16	0.999599	0.984084	0.967548	0.910829
K=16	0.998798	0.985414	0.96668	0.97362
K=16	0.992086	0.952167	0.982287	0.898148
K=16	0.997772	0.992492	0.933585	0.913261
K=16	1	0.988125	0.972902	0.932061
K=16	0.998197	0.977301	0.975041	0.914474
K=16	0.996144	0.979192	0.979601	0.882183
K=16	0.99898	0.98615	0.98128	0.882176
K=16	0.998579	0.982856	0.98194	0.86668
K=16	0.998798	0.971015	0.982372	0.932959
K=16	0.99388	0.988195	0.959584	0.893872
K=16	0.998739	0.975	0.960227	0.949067
K=16	0.999799	0.978391	0.9642	0.916901
K=16	0.998798	0.981397	0.963125	0.968988
K=16	1	0.980296	0.952719	0.945736
K=16	0.9984	0.976055	0.951717	0.929888
K=16	0.996799	0.984172	0.971185	0.904557
K=16	0.991477	0.985347	0.953907	0.947179
K=16	1	0.980475	0.926971	0.911682
K=16	0.9986	0.9638	0.950021	0.914773
K=16	0.991587	0.992083	0.914492	0.9212
K=16	0.99839	0.989899	0.9618	0.951224
K=16	0.998776	0.980695	0.978788	0.857688
K=16	1	0.969807	0.973939	0.879607
K=16	0.99796	0.974141	0.968081	0.852917
K=16	0.998368	0.985993	0.951981	0.880369
K=16	0.999384	0.972292	0.9926	0.937808
K=16	0.998333	0.978287	0.973072	0.890864
K=16	0.995512	0.967962	0.943434	0.9208
K=16	0.997172	0.988929	0.95613	0.949472
K=16	0.990942	0.991515	0.9676	0.871144
K=16	0.999583	0.992967	0.982759	0.913535
K=16	0.998798	0.990238	0.979125	0.914141
K=16	0.998768	0.983563	0.967156	0.935367
K=16	1	0.978191	0.976763	0.927677
K=16	1	0.965195	0.961414	0.916872
K=16	0.997799	0.990809	0.970388	0.91266
K=16	0.99796	0.980571	0.956383	0.921274
K=16	0.998974	0.98875	0.971096	0.884415
K=16	0.996667	0.969551	0.985	0.903446
K=16	0.997552	0.983736	0.976362	0.918507
K=16	0.99694	0.988791	0.958651	0.882045
K=16	0.998783	0.985629	0.9614	0.872949
K=16	1	0.986701	0.953125	0.9482
K=16	0.993131	0.976667	0.9454	0.862745
K=16	1	0.97849	0.9722	0.913626
K=16	0.998182	0.979885	0.956981	0.911232
K=16	0.996716	0.967882	0.963785	0.908414
K=16	0.997971	0.9816	0.976248	0.910564
K=16	1	0.988982	0.956383	0.905165
K=16	0.998377	0.983234	0.976391	0.876756
K=16	0.993559	0.972403	0.96095	0.878964
K=16	0.9996	0.98572	0.978591	0.915465
K=16	0.99798	0.983593	0.950707	0.912485
K=16	0.998598	0.950609	0.974	0.941212
K=16	0.993676	0.985055	0.957783	0.901561
K=16	1	0.965386	0.9643	0.856343
K=16	1	0.986263	0.966952	0.915459
K=16	0.99359	0.984401	0.951892	0.948892
K=16	0.996279	0.987196	0.966465	0.94978
K=16	1	0.982549	0.969089	0.961554
K=16	0.998358	0.989491	0.966787	0.876154
K=16	0.997971	0.990796	0.961039	0.856079
K=16	0.99839	0.981768	0.972	0.898234
K=16	0.998598	0.964983	0.985377	0.916901
K=16	0.994391	0.974343	0.972957	0.879464
K=16	0.999596	0.982136	0.968788	0.859093
K=16	0.998768	0.987795	0.9721	0.913409
K=16	0.993912	0.992188	0.955582	0.903232
K=16	1	0.987917	0.959583	0.9544
K=16	0.995773	0.955936	0.965116	0.898148
K=16	0.999599	0.970707	0.978958	0.864746
K=16	0.994253	0.970008	0.958534	0.920692
K=16	0.996693	0.978743	0.961138	0.888221
K=16	0.997796	0.975952	0.969188	0.921718
K=16	0.997799	0.978979	0.990208	0.90566
K=16	0.995331	0.9736	0.983774	0.882176
K=16	0.998399	0.959335	0.960458	0.907668
K=16	0.997726	0.985569	0.954911	0.907467
K=16	0.996392	0.970052	0.975241	0.955147
K=16	0.994458	0.964469	0.978191	0.927545
K=16	0.99875	0.977764	0.9722	0.927335
K=16	0.999388	0.976461	0.958539	0.896364
K=16	0.994792	0.987185	0.960184	0.869048
K=16	0.998579	0.98194	0.986194	0.887155
K=16	0.999167	0.978022	0.978992	0.932959
K=16	0.999109	0.969808	0.97747	0.869932
K=16	1	0.976643	0.981734	0.909164
K=16	0.996599	0.989532	0.966747	0.921569
K=16	0.999142	0.97504	0.951908	0.898836
K=16	0.9969	0.947646	0.966102	0.913061
K=16	0.997396	0.988352	0.94958	0.922922
K=16	0.999394	0.976162	0.983272	0.939181
K=16	0.994318	0.9796	0.960808	0.886263
K=16	0.996198	0.986111	0.9582	0.869318
K=16	0.997796	0.983517	0.965097	0.914427
K=16	0.9968	0.98334	0.943492	0.966546
K=16	0.999396	0.986453	0.963365	0.891157
K=16	0.993274	0.954509	0.96532	0.8972
K=16	0.9998	0.968054	0.97399	0.972021
K=16	0.997799	0.985978	0.976601	0.898953
K=16	0.997159	0.990505	0.973832	0.918076
K=16	0.999179	0.98539	0.984776	0.911465
K=16	1	0.989252	0.96895	0.908414
K=16	0.99809	0.977881	0.974034	0.870935
K=16	0.997596	0.984291	0.951765	0.900642
K=16	0.99938	0.919355	0.971997	0.9222
K=16	1	0.983974	0.986595	0.896158
K=16	0.997159	0.966586	0.963341	0.918901
K=16	0.998996	0.976315	0.955763	0.870793
K=16	0.99719	0.964343	0.963969	0.910879
K=16	0.997768	0.975316	0.957126	0.9548
K=16	0.996186	0.967159	0.978121	0.924517
K=16	0.998125	0.98262	0.967684	0.915417
K=16	0.9983	0.9775	0.939576	0.915861
K=16	0.997313	0.983507	0.962464	0.906362
K=16	0.997584	0.974635	0.9758	0.917567
K=16	0.994492	0.970012	0.977318	0.9098
K=16	0.997987	0.984745	0.965252	0.910256
K=16	1	0.981099	0.958333	0.869148
K=16	1	0.974635	0.951111	0.853865
K=16	1	0.993333	0.97499	0.933575
K=16	0.99625	0.98101	0.965454	0.816224
K=16	0.991397	0.970781	0.983232	0.92993
K=16	0.996394	0.962762	0.950487	0.947164
K=16	0.991747	0.981729	0.970505	0.945608
K=16	1	0.986701	0.960859	0.95416
K=16	0.998399	0.9575	0.964444	0.932492
K=16	1	0.993064	0.97499	0.878284
K=16	0.999192	0.976867	0.988929	0.942977
K=16	0.997599	0.9754	0.955758	0.954382
K=16	0.998397	0.993994	0.987555	0.906062
K=16	0.998397	0.980695	0.938808	0.926002
K=16	0.99876	0.979601	0.963828	0.959135
K=16	1	0.98878	0.969765	0.929346
K=16	1	0.984447	0.958132	0.929372
K=16	0.998182	0.973308	0.976	0.949074
K=16	0.997362	0.968375	0.972716	0.944178
K=16	0.99752	0.993597	0.984299	0.8616
K=16	1	0.976868	0.959655	0.919034
K=16	0.998346	0.980274	0.957172	0.920454
K=16	0.996716	0.990338	0.959454	0.928171
K=16	0.998153	0.983563	0.985252	0.842921
K=16	0.998563	0.980051	0.984167	0.919968
K=16	0.994663	0.987559	0.978766	0.896427
K=16	1	0.977865	0.959184	0.913647
K=16	0.992552	0.995833	0.96668	0.938301
K=16	0.9956	0.996094	0.977053	0.879496
K=16	0.999796	0.968379	0.96634	0.920156
K=16	0.997596	0.972323	0.948317	0.923169
K=16	0.999599	0.988711	0.953737	0.867388
K=16	0.997591	0.971875	0.95901	0.884554
K=16	1	0.987185	0.958583	0.92637
K=16	0.993709	0.990558	0.9798	0.9334
K=16	0.995785	0.96753	0.973505	0.944578
K=16	0.9992	0.983293	0.942377	0.912121
K=16	0.997799	0.976248	0.986579	0.850662
K=16	0.995716	0.977764	0.942828	0.896337
K=16	1	0.982	0.96895	0.966263
K=16	0.994391	0.979375	0.913689	0.927956
K=16	0.995151	0.980128	0.967548	0.8814
K=16	0.994591	0.958792	0.974747	0.909364
K=16	0.993472	0.96388	0.9604	0.938312
K=16	0.997396	0.980659	0.991477	0.889375
K=16	0.999599	0.989936	0.961138	0.932959
K=16	0.9996	0.971417	0.97516	0.900162
K=16	0.995798	0.959093	0.9508	0.921168
K=16	0.995593	0.981875	0.929772	0.938406
K=16	0.999159	0.951981	0.980731	0.842737
K=16	0.999132	0.988	0.98334	0.946667
K=16	0.999384	0.985843	0.980731	0.872909
K=16	0.998384	0.97619	0.967879	0.917102
K=16	0.999188	0.959454	0.958128	0.884014
K=16	0.996788	0.974747	0.974307	0.888617
K=16	0.998599	0.954792	0.97519	0.878384
K=16	0.998798	0.980263	0.976562	0.9373
K=16	0.999159	0.957512	0.983293	0.933939
K=16	0.997796	0.987179	0.979125	0.897168
K=16	1	0.957327	0.967949	0.910714
K=16	0.998188	0.963271	0.938003	0.915295
K=16	0.997726	0.979592	0.942734	0.873708
K=16	0.998397	0.99054	0.970788	0.8806
K=16	0.998598	0.979341	0.989196	0.839422
K=16	0.997537	0.983272	0.986194	0.889231
K=16	0.995	0.97747	0.948317	0.913097
K=16	0.99839	0.956282	0.966747	0.881273
K=16	1	0.965894	0.9808	0.924725
K=16	0.992797	0.981191	0.961184	0.927138
K=16	0.994419	0.96736	0.984	0.867547
K=16	0.995994	0.991087	0.981132	0.8912
K=16	0.997999	0.979501	0.967213	0.952672
K=16	0.995	0.991087	0.966263	0.876551
K=16	0.998595	0.9868	0.982424	0.911873
K=16	0.9882	0.993389	0.92466	0.955239
K=16	0.996788	0.960314	0.972323	0.883013
K=16	0.998598	0.979567	0.990396	0.951288
K=16	0.994179	0.987805	0.972423	0.901583
K=16	0.996999	0.990208	0.991949	0.930489
K=16	0.997292	0.989702	0.960749	0.893138
K=16	0.995376	0.989583	0.968587	0.913044
K=16	0.999798	0.974989	0.9722	0.912084
K=16	0.999592	0.972185	0.977657	0.919109
K=16	0.9946	0.988115	0.963986	0.918367
K=16	1	0.965688	0.966372	0.90605
K=16	1	0.974959	0.984794	0.930963
K=16	0.997917	0.989984	0.962708	0.868358
K=16	1	0.971837	0.959975	0.931458
K=16	0.998798	0.992784	0.985592	0.843349
K=16	0.993189	0.99388	0.9716	0.927571
K=16	0.998368	0.975196	0.983878	0.953982
K=16	0.999	0.951691	0.982048	0.952581
K=16	0.9966	0.984083	0.94978	0.928543
K=16	1	0.988576	0.9604	0.965986
K=16	1	0.987069	0.9754	0.856737
K=16	0.998384	0.9949	0.986178	0.879152
K=16	0.996956	0.974163	0.97619	0.84914
K=16	1	0.979192	0.986201	0.910764
K=16	0.997688	0.980008	0.9814	0.896653
K=16	0.997058	0.979626	0.946915	0.912485
K=16	0.998572	0.9794	0.965946	0.860465
K=16	0.996788	0.983258	0.966546	0.864448
K=16	0.999192	0.975962	0.958333	0.938596
K=16	1	0.976875	0.969952	0.94371
K=16	1	0.984704	0.978182	0.872786
K=16	0.996604	0.968788	0.967364	0.922769
K=16	0.998595	0.973758	0.966787	0.89896
K=16	1	0.981971	0.966186	0.95166
K=16	1	0.974583	0.961939	0.912886
K=16	0.999399	0.986771	0.977991	0.8442
K=16	0.9992	0.982345	0.971515	0.896031
K=16	0.997565	0.986969	0.984704	0.9102
K=16	0.996279	0.960136	0.924517	0.906404
K=16	1	0.981793	0.959784	0.927371
K=16	0.997997	0.962644	0.95118	0.896226
K=16	0.995793	0.970417	0.979167	0.912565
K=16	0.999599	0.969752	0.971111	0.900255
K=16	0.998193	0.984646	0.983994	0.890249
K=16	0.999398	0.978784	0.977764	0.951111
K=16	0.9996	0.987274	0.952922	0.907563
K=16	0.996279	0.979341	0.936775	0.865741
K=16	0.997552	0.979375	0.956644	0.9066
K=16	0.999799	0.989596	0.9776	0.947611
K=16	0.998788	0.974163	0.972222	0.864746
K=16	0.9998	0.96949	0.972423	0.936891
K=16	1	0.970588	0.984292	0.895825
K=16	0.999173	0.971062	0.961155	0.933644
K=16	0.996799	0.979403	0.954712	0.96
K=16	0.998397	0.978401	0.981571	0.927338
K=16	0.999388	0.982173	0.981604	0.931583
K=16	0.999587	0.981553	0.959596	0.849359
K=16	0.997126	0.982017	0.955763	0.893131
K=16	0.997641	0.965312	0.952	0.930288
K=16	0.999173	0.96757	0.977564	0.865558
K=16	0.998798	0.982336	0.975311	0.895698
K=16	0.997917	0.970092	0.963365	0.887355
K=16	0.998998	0.972121	0.987475	0.872749
K=16	0.998193	0.99045	0.9482	0.930624
K=16	0.996394	0.978784	0.953328	0.91951
K=16	0.995798	0.970988	0.965275	0.879952
K=16	1	0.971794	0.965986	0.958182
K=16	0.997029	0.983838	0.950921	0.921116
K=16	0.99719	0.99625	0.963468	0.92637
K=16	0.997799	0.981571	0.9674	0.826322
K=16	0.998563	0.964655	0.970909	0.916051
K=16	0.999799	0.981971	0.966315	0.908194
K=16	1	0.969828	0.954342	0.898613
K=16	1	0.979167	0.977057	0.916266
K=16	0.998529	0.9694	0.966787	0.892248
K=16	0.9994	0.981771	0.971096	0.927273
K=16	0.999197	0.968316	0.948081	0.939176
K=16	1	0.976023	0.979469	0.909856
K=16	0.998998	0.984704	0.983994	0.870739
K=16	0.997196	0.988191	0.972323	0.943761
K=16	1	0.986667	0.986178	0.917817
K=16	1	0.978591	0.960547	0.865385
K=16	0.998174	0.972888	0.975244	0.904221
K=16	0.998788	0.984849	0.962666	0.911717
K=16	0.9988	0.985275	0.978566	0.925681
K=16	0.9958	0.96343	0.970624	0.934
K=16	1	0.976405	0.956364	0.901667
K=16	0.998529	0.977363	0.989784	0.878856
K=16	0.998182	0.994583	0.979367	0.872949
K=16	0.997391	0.985414	0.975758	0.88285
K=16	0.99783	0.992397	0.974	0.877335
K=16	1	0.981935	0.978462	0.8634
K=16	0.99184	0.987773	0.964343	0.920441
K=16	0.997576	0.9825	0.972868	0.910509
K=16	0.998974	0.992997	0.9794	0.939209
K=16	0.99899	0.973129	0.945913	0.935568
K=16	0.998579	0.979121	0.98202	0.910106
K=16	1	0.982891	0.967548	0.939613
K=16	0.9936	0.982553	0.9708	0.872949
K=16	0.997565	0.983297	0.959454	0.960633
K=16	0.998792	0.993056	0.966987	0.929948
K=16	1	0.971015	0.969691	0.893737
K=16	1	0.982864	0.952253	0.931515
K=16	0.999799	0.992552	0.914117	0.879366
K=16	0.999173	0.987118	0.938607	0.948013
K=16	0.991546	0.940977	0.977591	0.872126
K=16	0.990148	0.984776	0.938607	0.90326
K=16	1	0.995484	0.970612	0.955128
K=16	0.996364	0.975928	0.965097	0.881642
K=16	0.999594	0.977692	0.973522	0.9708
K=16	0.998598	0.99054	0.965986	0.887071
K=16	0.994798	0.978565	0.987598	0.902961
K=16	0.99809	0.989145	0.980722	0.908867
K=16	0.999	0.993994	0.946634	0.962785
K=16	0.999796	0.975976	0.97806	0.873149
K=16	0.998	0.97604	0.963385	0.853165
K=16	0.996599	0.955841	0.986916	0.850244
K=16	0.999195	0.956644	0.951704	0.920112
K=16	0.9938	0.988202	0.977519	0.875805
K=16	0.997292	0.963076	0.973229	0.878417
K=16	0.996703	0.985294	0.957131	0.914117
K=16	0.9998	0.974779	0.9596	0.857171
K=16	0.995756	0.977692	0.951626	0.877551
K=16	0.989495	0.993221	0.9754	0.884236
K=16	0.996795	0.971675	0.925731	0.933762
K=16	0.9992	0.968169	0.970303	0.860404
K=16	0.998994	0.966136	0.968349	0.951723
K=16	0.996566	0.989813	0.96875	0.939005
K=16	1	0.980073	0.971755	0.953937
K=16	0.995074	0.990412	0.969156	0.936371
K=16	0.998188	0.985414	0.951522	0.9204
K=16	1	0.991636	0.98752	0.928886
K=16	0.995484	0.977764	0.976716	0.867523
K=16	0.997103	0.958192	0.935367	0.922877
K=16	0.992	0.972257	0.955918	0.890756
K=16	0.997565	0.964504	0.935221	0.929167
K=16	0.993189	0.98399	0.98625	0.963341
K=16	0.998776	0.965952	0.979267	0.895901
K=16	0.997182	0.971562	0.966881	0.902577
K=16	0.999799	0.962828	0.9725	0.929803
K=16	1	0.951355	0.971476	0.930419
K=16	0.9964	0.978992	0.956169	0.894122
K=16	0.99458	0.969697	0.977965	0.889956
K=16	1	0.982964	0.962785	0.912165
K=16	0.998193	0.992248	0.956644	0.902083
K=16	0.997399	0.977858	0.971015	0.964708
K=16	0.993978	0.981737	0.965982	0.9142
K=16	0.9964	0.993333	0.970238	0.847356
K=16	0.996768	0.98137	0.958133	0.858944
K=16	0.997313	0.978766	0.96757	0.899038
K=16	1	0.985118	0.951981	0.914766
K=16	0.99956	0.987745	0.958535	0.902375
K=16	0.999599	0.990796	0.97439	0.909697
K=16	1	0.988441	0.937808	0.92437
K=16	0.996394	0.979537	0.982222	0.888956
K=16	1	0.986374	0.964586	0.908889
K=16	0.99876	0.985749	0.978121	0.901361
K=16	0.998681	0.981533	0.959192	0.917468
K=16	0.999398	0.987185	0.974635	0.8762
K=16	1	0.977883	0.958852	0.918975
K=16	0.997999	0.965074	0.964573	0.902222
K=16	1	0.968958	0.968587	0.931172
K=16	1	0.9752	0.97439	0.919596
K=16	0.995785	0.97861	0.969351	0.94376
K=16	0.997196	0.979885	0.969952	0.87661
K=16	1	0.975417	0.9578	0.920112
K=16	0.995453	0.97539	0.966947	0.938109
K=16	0.998197	0.978765	0.930951	0.896358
K=16	0.999795	0.981436	0.994833	0.914693
K=16	0.995895	0.970208	0.953232	0.860377
K=16	1	0.969351	0.969604	0.87339
K=16	0.996989	0.9848	0.949319	0.892525
K=16	0.991143	0.971476	0.9904	0.928686
K=16	0.992727	0.97559	0.974545	0.933172
K=16	0.997144	0.987691	0.960737	0.904762
K=16	0.99376	0.979911	0.978261	0.834375
K=16	1	0.991087	0.986779	0.857085
K=16	0.998798	0.960103	0.975196	0.893818
K=16	0.998798	0.981397	0.988168	0.930349
K=16	0.993978	0.944185	0.954837	0.860744
K=16	0.99796	0.979768	0.936298	0.863782
K=16	0.997993	0.988051	0.957995	0.932959
K=16	0.9975	0.989792	0.953325	0.9242
K=16	0.992972	0.953737	0.967348	0.910427
K=16	0.999167	0.981737	0.939935	0.846755
K=16	1	0.982171	0.929972	0.901168
K=16	0.998591	0.977512	0.956768	0.897746
K=16	0.999596	0.995703	0.9662	0.919394
K=16	0.993542	0.977083	0.938404	0.921769
K=16	0.993376	0.990885	0.958333	0.930172
K=16	0.997182	0.974635	0.959821	0.879952
K=16	0.999576	0.97516	0.947917	0.9452
K=16	0.999592	0.9776	0.956169	0.941377
K=16	0.999396	0.974175	0.976763	0.907997
K=16	1	0.985144	0.957933	0.907467
K=16	0.997997	0.984375	0.964646	0.934174
K=16	0.993577	0.988958	0.963341	0.954304
K=16	0.998901	0.971102	0.97399	0.868326
K=16	0.9992	0.976991	0.948687	0.915166
K=16	0.999783	0.979192	0.959184	0.896739
K=16	0.997768	0.981988	0.984976	0.893557
K=16	0.997537	0.959016	0.950422	0.861667
K=16	0.999388	0.977582	0.9792	0.9296
K=16	1	0.978287	0.958333	0.933939
K=16	0.995998	0.987319	0.978391	0.893473
K=16	0.999197	0.986514	0.970895	0.870773
K=16	0.992188	0.977692	0.964167	0.900404
K=16	0.9976	0.995104	0.982488	0.918
K=16	0.997399	0.975041	0.985994	0.944242
K=16	0.998798	0.979708	0.9682	0.911859
K=16	0.997591	0.977722	0.961851	0.914062
K=16	0.997596	0.967879	0.9808	0.958539
K=16	0.997898	0.976881	0.983974	0.900642
K=16	0.995785	0.963076	0.983897	0.950886
K=16	1	0.977374	0.948918	0.89491
K=16	0.99978	0.982292	0.977356	0.899038
K=16	0.989562	0.97495	0.969212	0.918384
K=16	0.998994	0.979475	0.966586	0.862424
K=16	1	0.991756	0.981616	0.88909
K=16	0.997993	0.980699	0.970373	0.908889
K=16	1	0.97623	0.974159	0.934174
K=16	0.998108	0.983396	0.943109	0.8714
K=16	0.998125	0.985796	0.948687	0.92557
K=16	0.996194	0.983574	0.986	0.9456
K=16	0.999799	0.977143	0.960202	0.935345
K=16	0.998384	0.938218	0.958651	0.896566
K=16	0.996736	0.984911	0.985749	0.869318
K=16	0.99899	0.985377	0.97792	0.919711
K=16	0.998384	0.983373	0.9516	0.913862
K=16	0.99752	0.967879	0.955038	0.906602
K=16	0.992695	0.985998	0.966787	0.947579
K=16	0.999184	0.982954	0.975241	0.815905
K=16	0.997792	0.977012	0.95012	0.868156
K=16	1	0.986658	0.965728	0.9122
K=16	0.997997	0.977057	0.980008	0.936374
K=16	0.999197	0.978038	0.959944	0.934581
K=16	0.999195	0.943396	0.934696	0.94998
K=16	0.999384	0.980364	0.979792	0.907062
K=16	0.998394	0.985507	0.968542	0.918384
K=16	0.996795	0.963958	0.963	0.910225
K=16	0.999793	0.99005	0.960417	0.880808
K=16	0.994998	0.979885	0.96387	0.903846
K=16	0.999184	0.982917	0.966387	0.918586
K=16	0.996364	0.989702	0.94978	0.939005
K=16	0.998197	0.989293	0.9842	0.907606
K=16	0.993939	0.978653	0.9656	0.816198
K=16	0.995756	0.974839	0.95934	0.88909
K=16	0.997537	0.9625	0.976258	0.892929
K=16	0.998768	0.976128	0.969188	0.914933
K=16	0.987475	0.978353	0.974343	0.904424
K=16	0.996981	0.981079	0.961956	0.924107
K=16	1	0.993351	0.96668	0.917302
K=16	0.999197	0.985	0.979064	0.894737
K=16	0.991597	0.97	0.97439	0.921769
K=16	0.997591	0.976336	0.960277	0.932727
K=16	0.9952	0.984646	0.973906	0.894737
K=16	0.999	0.97476	0.962185	0.906362
K=16	1	0.97772	0.969892	0.909091
K=16	0.996599	0.95187	0.962866	0.914583
K=16	0.997796	0.963285	0.948179	0.935096
K=16	0.99978	0.985	0.971297	0.950483
K=16	0.997196	0.969752	0.971848	0.8908
K=16	0.993961	0.957917	0.981333	0.934374
K=16	0.998598	0.965252	0.977991	0.888421
K=16	1	0.973346	0.970494	0.833198
K=16	1	0.959944	0.958247	0.960737
K=16	1	0.982689	0.980035	0.949119
K=16	0.996783	0.965	0.980369	0.864546
K=16	0.997596	0.988846	0.960404	0.95038
K=16	0.987419	0.972323	0.961461	0.92637
K=16	0.997537	0.982083	0.964472	0.918222
K=16	0.999188	0.962589	0.98062	0.915435
K=16	0.994545	0.971515	0.967587	0.95078
K=16	0.999195	0.983483	0.979567	0.932373
K=16	0.998591	0.977832	0.948687	0.866585
K=16	0.998164	0.97437	0.96	0.904055
K=16	1	0.9682	0.965275	0.899639
K=16	0.994213	0.982348	0.9838	0.921266
K=16	0.997199	0.978663	0.97697	0.942593
K=16	0.998799	0.966133	0.956983	0.898836
K=16	1	0.97476	0.9344	0.92517
K=16	0.997537	0.981295	0.960584	0.889756
K=16	0.998799	0.98284	0.969089	0.912861
K=16	0.997159	0.986351	0.966515	0.936594
K=16	0.997756	0.987216	0.967938	0.917874
K=16	0.995584	0.974392	0.956783	0.926
K=16	0.995598	0.986978	0.972625	0.973103
K=16	0.999583	0.983193	0.965018	0.881979
K=16	1	0.99168	0.94724	0.873333
K=16	0.995074	0.981414	0.968387	0.879165
K=16	0.998776	0.982197	0.971059	0.8942
K=16	1	0.978743	0.962385	0.898349
K=16	0.9975	0.976461	0.967995	0.909255
K=16	0.9925	0.9956	0.97504	0.90942
K=16	0.987595	0.97562	0.944801	0.847939
K=16	1	0.983766	0.967082	0.913535
K=16	1	0.976707	0.974436	0.949091
K=16	0.9998	0.978788	0.976162	0.883153
K=16	0.996989	0.990017	0.962872	0.944178
K=16	0.999793	0.996528	0.950221	0.9204
K=16	0.999597	0.975649	0.961039	0.921274
K=16	0.9998	0.976671	0.97343	0.95018
K=16	1	0.984084	0.973357	0.953818
K=16	0.999796	0.9925	0.961755	0.921699
K=16	0.998713	0.966146	0.961585	0.903361
K=16	0.99839	0.974569	0.954106	0.941453
K=16	0.998598	0.978859	0.9786	0.94686
K=16	0.99625	0.975311	0.942977	0.88599
K=16	0.9996	0.968996	0.970624	0.886555
K=16	0.998197	0.98368	0.970101	0.93898
K=16	0.998358	0.965706	0.986536	0.948
K=16	0.9996	0.974436	0.980592	0.871578
K=16	0.999188	0.9678	0.977091	0.911682
K=16	0.999173	0.962424	0.986715	0.907206
K=16	1	0.994875	0.951652	0.917967
K=16	0.997947	0.972989	0.967548	0.918105
K=16	1	0.978387	0.981393	0.834934
K=16	0.999596	0.992397	0.962785	0.916567
K=16	0.995198	0.968596	0.964083	0.933905
K=16	0.998125	0.976643	0.965877	0.899239
K=16	0.997726	0.967483	0.973823	0.900579
K=16	0.996995	0.962381	0.970353	0.901242
K=16	0.993799	0.989763	0.968283	0.916499
K=16	1	0.979526	0.979192	0.90036
K=16	0.994766	0.978992	0.971313	0.862304
K=16	0.997083	0.96274	0.985657	0.917
K=16	0.99752	0.98681	0.966479	0.9072
K=16	1	0.993197	0.982752	0.901445
K=16	0.999184	0.983456	0.969409	0.94186
K=16	0.99694	0.978591	0.9376	0.89403
K=16	0.998572	0.9925	0.95495	0.903784
K=16	1	0.973214	0.968085	0.853071
K=16	0.998798	0.976875	0.955717	0.889899
K=16	0.999599	0.981715	0.967391	0.954127
K=16	0.999173	0.982766	0.977791	0.904589
K=16	0.997584	0.980909	0.954342	0.889156
K=16	0.999798	0.993633	0.940747	0.936738
K=16	0.998399	0.978919	0.963385	0.889493
K=16	0.998164	0.971925	0.965503	0.849026
K=16	0.9976	0.972835	0.974163	0.904589
K=16	1	0.9564	0.965781	0.941188
K=16	1	0.972501	0.975962	0.892727
K=16	0.998599	0.982143	0.983838	0.897321
K=16	0.995598	0.979526	0.9643	0.901771
K=16	1	0.970828	0.967949	0.914748
K=16	0.998358	0.990412	0.951691	0.875604
K=16	0.995074	0.958984	0.967548	0.909474
K=16	1	0.988591	0.955049	0.881273
K=16	1	0.994857	0.939412	0.875362
K=16	0.997599	0.95375	0.963465	0.898788
K=16	0.998164	0.977519	0.975241	0.940185
K=16	1	0.976867	0.968375	0.893717
K=16	0.999399	0.986969	0.954343	0.891473
K=16	0.9976	0.989702	0.962785	0.941377
K=16	0.997106	0.972085	0.939815	0.927539
K=16	0.992289	0.966458	0.977118	0.886993
K=16	0.992788	0.968391	0.958784	0.9496
K=16	0.999793	0.96757	0.929789	0.911458
K=16	0.999599	0.989899	0.96256	0.869318
K=16	0.998197	0.992929	0.984394	0.957364
K=16	1	0.96736	0.983793	0.850446
K=16	0.996588	0.99045	0.968687	0.904506
K=16	0.9992	0.968684	0.943978	0.851465
K=16	0.999599	0.967677	0.963067	0.918076
K=16	0.996667	0.986	0.956731	0.876351
K=16	0.998949	0.981436	0.934581	0.937182
K=16	0.995785	0.971967	0.934949	0.940776
K=16	0.995586	0.985859	0.965386	0.893157
K=16	1	0.97125	0.932692	0.897832
K=16	0.997708	0.944583	0.953301	0.87963
K=16	0.993961	0.98053	0.940747	0.962626
K=16	0.996399	0.971062	0.978723	0.9046
K=16	0.997688	0.9734	0.981971	0.9202
K=16	0.996989	0.976643	0.977364	0.926263
K=16	0.996799	0.97246	0.98572	0.932727
K=16	1	0.972411	0.962424	0.934747
K=16	0.997665	0.956342	0.972756	0.915258
K=16	0.999184	0.98739	0.93263	0.862981
K=16	1	0.985377	0.9686	0.920272
K=16	0.998591	0.9694	0.966385	0.907917
K=16	0.998996	0.994364	0.9726	0.923309
K=16	0.997576	0.964744	0.974436	0.912356
K=16	0.998994	0.985837	0.97348	0.940576
K=16	0.995758	0.964271	0.965706	0.88125
K=16	0.9992	0.977301	0.96949	0.9616
K=16	0.99349	0.978896	0.971627	0.933497
K=16	0.997971	0.976044	0.963385	0.86505
K=16	1	0.959535	0.948283	0.932373
K=16	0.998514	0.975196	0.972525	0.952468
K=16	0.996387	0.98368	0.973589	0.94237
K=16	0.9968	0.981875	0.935	0.869
K=16	0.9972	0.987479	0.951087	0.858384
K=16	0.995074	0.9834	0.985507	0.898838
K=16	0.99798	0.978125	0.978766	0.907609
K=16	0.996198	0.974839	0.97539	0.9348
K=16	0.999592	0.970476	0.978191	0.936987
K=16	1	0.97516	0.960404	0.916063
K=16	1	0.970033	0.963385	0.952925
K=16	0.998783	0.95825	0.960934	0.935174
K=16	0.9972	0.969184	0.98674	0.95546
K=16	0.998783	0.987745	0.963585	0.927677
K=16	0.995453	0.964096	0.976042	0.879831
K=16	0.9996	0.972678	0.946715	0.873535
K=16	0.998996	0.965322	0.946875	0.915865
K=16	0.996788	0.9723	0.933573	0.939412
K=16	0.997792	0.977152	0.974359	0.922626
K=16	1	0.986453	0.954327	0.929346
K=16	0.999399	0.946406	0.952525	0.944308
K=16	0.998377	0.987708	0.964386	0.921168
K=16	0.998397	0.978172	0.949119	0.8872
K=16	0.9994	0.987472	0.962963	0.953781
K=16	0.997537	0.977422	0.97772	0.838182
K=16	0.994927	0.974635	0.948686	0.918586
K=16	0.9964	0.974783	0.959608	0.901973
K=16	0.99592	0.992434	0.97561	0.908069
K=16	0.995104	0.989121	0.943434	0.881477
K=16	0.999	0.977764	0.945713	0.900579
K=16	0.998284	0.979871	0.9666	0.894945
K=16	0.998796	0.991042	0.957583	0.920112
K=16	0.9992	0.979911	0.958651	0.906062
K=16	0.999394	0.977374	0.965	0.9238
K=16	0.995974	0.975477	0.955233	0.935167
K=16	0.993216	0.96719	0.987154	0.891226
K=16	0.999599	0.983077	0.952925	0.906763
K=16	0.9992	0.993637	0.983897	0.910511
K=16	0.997565	0.990148	0.934696	0.929383
K=16	1	0.974959	0.981193	0.938
K=16	0.995393	0.981191	0.978566	0.955665
K=16	0.99876	0.982205	0.941558	0.882711
K=16	0.998197	0.97375	0.946631	0.91389
K=16	0.999596	0.980073	0.968687	0.892027
K=16	0.999792	0.981667	0.966787	0.919143
K=16	0.998998	0.979055	0.985859	0.906473
K=16	1	0.96989	0.9782	0.948779
K=16	0.998199	0.975594	0.970008	0.897544
K=16	1	0.975758	0.95613	0.888188
K=16	0.997999	0.9825	0.972756	0.904589
K=16	0.9988	0.9796	0.976716	0.884584
K=16	0.9992	0.994663	0.948615	0.856571
K=16	0.998985	0.967436	0.964	0.877029
K=16	0.998358	0.9634	0.9738	0.878621
K=16	0.997786	0.980169	0.971	0.923542
K=16	0.997182	0.9854	0.970442	0.861945
K=16	0.996	0.981811	0.930172	0.908069
K=16	0.996923	0.968803	0.966544	0.92537
K=16	0.99899	0.983193	0.976651	0.945414
K=16	0.997917	0.971686	0.954141	0.9242
K=16	0.995192	0.971794	0.9646	0.939976
K=16	0.999179	0.988687	0.970388	0.939681
K=16	0.998595	0.984646	0.963785	0.886465
K=16	0.996511	0.971848	0.956731	0.895934
K=16	0.997453	0.984583	0.977519	0.953325
K=16	0.997159	0.988752	0.976651	0.939382
K=16	0.998915	0.972096	0.945578	0.955936
K=16	0.99625	0.970171	0.966747	0.930572
K=16	0.998598	0.948298	0.944511	0.925481
K=16	0.999179	0.969351	0.958937	0.887677
K=16	0.998595	0.979064	0.955782	0.932121
K=16	1	0.96757	0.988325	0.9276
K=16	1	0.977083	0.978191	0.926571
K=16	0.995169	0.946869	0.974569	0.870053
K=16	1	0.973956	0.950123	0.940705
K=16	0.999798	0.99065	0.955417	0.834534
K=16	0.995104	0.965524	0.973958	0.925253
K=16	0.99719	0.98876	0.973684	0.917503
K=16	0.99236	0.983434	0.961739	0.930972
K=16	1	0.988115	0.968081	0.910241
K=16	0.999596	0.969289	0.987352	0.935789
K=16	0.997792	0.98164	0.977932	0.924716
K=16	1	0.987216	0.971189	0.903985
K=16	0.998788	0.968599	0.968687	0.910303
K=16	0.998966	0.97708	0.977564	0.947579
K=16	0.996144	0.995659	0.974307	0.915264
K=16	0.995151	0.970171	0.956644	0.912083
K=16	0.999594	0.957899	0.955113	0.922476
K=16	0.9961	0.987274	0.940787	0.936566
K=16	0.998796	0.979192	0.964848	0.90036
K=16	0.998796	0.978733	0.9634	0.916396
K=16	0.997396	0.987148	0.968398	0.872786
K=16	1	0.988425	0.984	0.919745
K=16	0.997987	0.983571	0.956	0.893015
K=16	1	0.985147	0.964386	0.921317
K=16	0.9996	0.987622	0.95512	0.91913
K=16	0.998368	0.989912	0.963268	0.952781
K=16	1	0.989854	0.983374	0.895151
K=16	0.995556	0.977881	0.958852	0.887
K=16	1	0.954393	0.97552	0.936298
K=16	0.997786	0.947086	0.958784	0.919394
K=16	0.999795	0.979475	0.967364	0.944192
K=16	0.9992	0.973832	0.979592	0.914949
K=16	0.996511	0.987395	0.979	0.944578
K=16	0.990365	0.977677	0.977692	0.895934
K=16	0.998182	0.947849	0.957983	0.9144
K=16	0.99592	0.977968	0.9692	0.868217
K=16	0.999167	0.987054	0.965786	0.934174
K=16	0.9998	0.985657	0.972917	0.897778
K=16	0.998739	0.980202	0.988012	0.936098
K=16	0.99899	0.983793	0.940341	0.898638
K=16	0.999795	0.968485	0.975761	0.878
K=16	0.995166	0.979269	0.974163	0.909164
K=16	1	0.97569	0.964	0.903646
K=16	0.998125	0.987274	0.948283	0.948117
K=16	0.997596	0.993535	0.9744	0.878606
K=16	0.997374	0.967949	0.984984	0.883782
K=16	0.998462	0.98009	0.964673	0.854167
K=16	0.997599	0.9772	0.927571	0.893029
K=16	0.994207	0.964504	0.979928	0.925657
K=16	0.997768	0.974229	0.987319	0.927135
K=16	0.990796	0.992695	0.94798	0.951087
K=16	0.99388	0.976763	0.970895	0.864245
K=16	1	0.977191	0.988181	0.931034
K=16	0.999592	0.979792	0.943182	0.9375
K=16	0.998384	0.975547	0.973589	0.926171
K=16	1	0.976997	0.96106	0.944199
K=16	0.997768	0.965877	0.956778	0.919082
K=16	1	0.975316	0.958116	0.853766
K=16	0.99719	0.98674	0.956956	0.948889
K=16	0.997591	0.984984	0.95211	0.889495
K=16	0.997106	0.975196	0.961338	0.875
K=16	0.9986	0.981925	0.960591	0.873521
K=16	1	0.985108	0.958133	0.9144
K=16	0.9976	0.976671	0.978766	0.947979
K=16	0.993101	0.982752	0.961662	0.888599
K=16	0.99839	0.956956	0.971154	0.946879
K=16	0.997396	0.99054	0.940419	0.957327
K=16	0.999151	0.978243	0.98053	0.933442
K=16	0.996956	0.965251	0.9653	0.9164
K=16	0.999599	0.968996	0.975758	0.914291
K=16	0.998591	0.983593	0.98876	0.936364
K=16	0.995484	0.976315	0.971989	0.93597
K=16	0.9982	0.977865	0.971955	0.946915
K=16	1	0.964696	0.97437	0.965742
K=16	0.996377	0.962589	0.969588	0.931361
K=16	0.996042	0.968254	0.9776	0.904444
K=16	1	0.992898	0.966061	0.912989
K=16	0.997947	0.966928	0.951313	0.961985
K=16	0.999799	0.962256	0.974583	0.929789
K=16	0.997083	0.965517	0.963942	0.932272
K=16	0.9994	0.981811	0.9752	0.937975
K=16	0.999796	0.965745	0.920473	0.897374
K=16	0.995169	0.98358	0.969289	0.923
K=16	1	0.986545	0.98101	0.887879
K=16	0.998377	0.981553	0.941626	0.9756
K=16	1	0.98112	0.977968	0.886061
K=16	1	0.994506	0.985978	0.914263
K=16	0.998377	0.982348	0.950944	0.955113
K=16	0.998397	0.986752	0.977519	0.887595
K=16	0.999797	0.981324	0.953896	0.889022
K=16	1	0.99569	0.970411	0.943841
K=16	0.999799	0.96404	0.974046	0.901361
K=16	0.999599	0.978992	0.972664	0.9298
K=16	0.989161	0.977495	0.95773	0.9098
K=16	0.99938	0.990107	0.964792	0.927536
K=16	0.99959	0.990303	0.963054	0.845008
K=16	0.998799	0.972701	0.957848	0.916193
K=16	0.999195	0.961414	0.984811	0.928982
K=16	0.995198	0.984811	0.9847	0.875
K=16	1	0.97707	0.9723	0.866869
K=16	0.99938	0.97499	0.972292	0.867401
K=16	0.998586	0.991274	0.952181	0.868958
K=16	0.998193	0.99569	0.96126	0.9614
K=16	0.998798	0.981971	0.957995	0.970152
K=16	0.998595	0.994358	0.940419	0.867322
K=16	0.997799	0.977152	0.980792	0.945805
K=16	0.998595	0.953704	0.959213	0.920606
K=16	0.999788	0.98713	0.9388	0.883958
K=16	0.998346	0.989702	0.984994	0.923522
K=16	0.9996	0.993101	0.9952	0.925493
K=16	0.996279	0.962028	0.95512	0.940016
K=16	1	0.977722	0.975151	0.897065
K=16	0.995453	0.989045	0.962668	0.939192
K=16	0.990796	0.985144	0.97419	0.924969
K=16	0.99697	0.973958	0.978523	0.912541
K=16	0.998739	0.99	0.953834	0.9254
K=16	0.998368	0.974704	0.943697	0.918788
K=16	0.995773	0.975807	0.958604	0.89306
K=16	0.991228	0.979341	0.980317	0.908995
K=16	0.9996	0.984776	0.965097	0.879968
K=16	0.997786	0.980952	0.963465	0.909792
K=16	1	0.973229	0.990616	0.91112
K=16	1	0.98539	0.968599	0.908076
K=16	0.997292	0.987352	0.97519	0.927475
K=16	0.997374	0.994115	0.97539	0.898742
K=16	0.99814	0.987083	0.986351	0.905126
K=16	0.997362	0.984646	0.956924	0.947677
K=16	0.997396	0.976391	0.938378	0.948081
K=16	0.991753	0.983447	0.9762	0.8836
K=16	0.997584	0.967742	0.967735	0.916466
K=16	0.997576	0.992695	0.980931	0.856683
K=16	0.999599	0.973823	0.942268	0.92375
K=16	1	0.984911	0.971589	0.923369
K=16	0.999384	0.981768	0.9722	0.902778
K=16	1	0.969822	0.965786	0.854692
K=16	0.998958	0.972453	0.978784	0.919237
K=16	0.99938	0.978125	0.967273	0.916867
K=16	0.999587	0.985796	0.975649	0.954327
K=16	0.996921	0.979124	0.965982	0.863325
K=16	0.99697	0.947516	0.966928	0.927684
K=16	0.997126	0.985859	0.944378	0.891026
K=16	0.993961	0.961007	0.973214	0.878551
K=16	0.998994	0.9825	0.978653	0.826818
K=16	0.996217	0.985016	0.953502	0.897119
K=16	0.998799	0.975845	0.9524	0.888398
K=16	0.99979	0.98336	0.9858	0.861513
K=16	0.994781	0.970238	0.961414	0.897029
K=16	0.999391	0.977318	0.973027	0.878764
K=16	0.997126	0.978333	0.974559	0.936964
K=16	0.99697	0.972623	0.960658	0.899192
K=16	0.999195	0.969293	0.970494	0.904146
K=16	0.999188	0.978064	0.969007	0.931159
K=16	0.996693	0.988711	0.962465	0.907606
K=16	0.997565	0.97685	0.942777	0.876551
K=16	0.996578	0.977172	0.964894	0.977318
K=16	0.99937	0.976963	0.967391	0.894358
K=16	0.998302	0.994006	0.9304	0.901061
K=16	0.99125	0.992708	0.985994	0.927354
K=16	0.995039	0.983289	0.984299	0.925657
K=16	1	0.966387	0.970505	0.962063
K=16	0.998199	0.968485	0.982537	0.918767
K=16	0.997383	0.982626	0.9668	0.87395
K=16	0.9974	0.987352	0.968398	0.935096
K=16	0.999799	0.98194	0.961445	0.855519
K=16	0.994591	0.9775	0.95098	0.936498
K=16	0.996217	0.973939	0.980392	0.888485
K=16	1	0.983169	0.9664	0.913462
K=16	1	0.989366	0.965877	0.9072
K=16	0.993333	0.987923	0.940376	0.892957
K=16	1	0.977965	0.972929	0.939209
K=16	0.9998	0.975758	0.982738	0.8854
K=16	0.999592	0.99697	0.949217	0.901877
K=16	0.99719	0.971032	0.965781	0.937901
K=16	0.996399	0.973831	0.979727	0.871511
K=16	0.997799	0.978832	0.973684	0.932758
K=16	1	0.978565	0.934747	0.947156
K=16	0.997396	0.963259	0.977722	0.902449
K=16	0.999793	0.973558	0.967684	0.908964
K=16	0.998799	0.961444	0.96	0.910678
K=16	0.9996	0.979947	0.968197	0.865942
K=16	0.996399	0.982252	0.963268	0.897832
K=16	0.99839	0.98062	0.961328	0.910714
K=16	0.99399	0.973558	0.973906	0.901442
K=16	0.995512	0.979592	0.931006	0.923077
K=16	0.9996	0.98404	0.93438	0.872796
K=16	1	0.97399	0.985176	0.86933
K=16	1	0.970366	0.970649	0.944646
K=16	0.9982	0.984396	0.972021	0.912861
K=16	0.992774	0.976047	0.944311	0.94898
K=16	0.993577	0.974149	0.955841	0.890505
K=16	0.999199	0.983958	0.967475	0.903784
K=16	0.995773	0.989042	0.97399	0.907071
K=16	1	0.974792	0.958182	0.923297
K=16	0.99375	0.98913	0.969828	0.8752
K=16	0.996753	0.984447	0.971837	0.872749
K=16	0.996999	0.989996	0.965097	0.871537
K=16	1	0.988715	0.9702	0.932
K=16	0.9994	0.9439	0.97792	0.906667
K=16	0.997591	0.980009	0.973589	0.92505
K=16	0.996399	0.979992	0.987879	0.914409
K=16	0.996658	0.976867	0.957647	0.9068
K=16	0.99375	0.965833	0.975556	0.907563
K=16	1	0.987995	0.959984	0.918306
K=16	1	0.974725	0.956583	0.878351
K=16	0.998598	0.98681	0.967735	0.904255
K=16	1	0.969167	0.96387	0.884014
K=16	0.9961	0.985548	0.969988	0.920089
K=16	1	0.987273	0.985657	0.894821
K=16	0.995994	0.973072	0.969156	0.900362
K=16	0.998798	0.9723	0.955314	0.914663
K=16	0.999596	0.97899	0.965252	0.924528
K=16	0.997391	0.983464	0.980369	0.949807
K=16	0.997179	0.993064	0.927171	0.859098
K=16	0.997144	0.96404	0.958	0.925122
K=16	0.998966	0.984704	0.959	0.916063
K=16	0.998188	0.978562	0.980008	0.915459
K=16	0.998197	0.97747	0.966989	0.927684
K=16	0.99959	0.985016	0.952781	0.97619
K=16	1	0.96441	0.943577	0.933374
K=16	0.997786	0.969409	0.964583	0.947812
K=16	0.999599	0.958604	0.972556	0.892121
K=16	0.998153	0.975244	0.94998	0.922276
K=16	0.994325	0.982143	0.959944	0.9282
K=16	0.997987	0.986854	0.968	0.881291
K=16	0.997999	0.980606	0.97182	0.925382
K=16	0.999184	0.98358	0.965895	0.923926
K=16	0.994318	0.968684	0.948117	0.924679
K=16	1	0.972423	0.969551	0.925325
K=16	1	0.981771	0.991186	0.910657
K=16	0.999793	0.978859	0.974839	0.885064
K=16	0.998768	0.980706	0.985194	0.895833
K=16	0.999363	0.982336	0.954106	0.92918
K=16	0.995198	0.985945	0.945854	0.921274
K=16	0.99899	0.9728	0.989854	0.930172
K=16	0.992797	0.970833	0.963365	0.9192
K=16	0.993737	0.982222	0.964986	0.852917
K=16	0.997599	0.992323	0.963125	0.929348
K=16	0.998358	0.977917	0.970303	0.922619
K=16	0.998529	0.99045	0.979871	0.849838
K=16	0.994565	0.98913	0.967677	0.917778
K=16	0.998193	0.975333	0.980569	0.927173
K=16	0.998153	0.984145	0.983994	0.891557
K=16	0.999398	0.974286	0.962385	0.90625
K=16	0.999597	0.988358	0.954508	0.885252
K=16	0.996	0.986869	0.980592	0.910277
K=16	0.994833	0.97326	0.9508	0.951111
K=16	0.997799	0.972701	0.984984	0.947646
K=16	0.9996	0.977057	0.968176	0.917
K=16	0.998197	0.990332	0.958133	0.904962
K=16	1	0.98404	0.9758	0.908414
K=16	1	0.983139	0.974296	0.884058
K=16	0.993506	0.9852	0.9326	0.93277
K=16	0.9996	0.990463	0.949269	0.905248
K=16	1	0.994364	0.978865	0.920237
K=16	0.999597	0.976591	0.967213	0.842127
K=16	0.996387	0.986864	0.945913	0.885064
K=16	0.997591	0.995785	0.949	0.929487
K=16	0.998397	0.981458	0.963969	0.864746
K=16	0.998182	0.9748	0.951823	0.947115
K=16	0.998377	0.973333	0.96043	0.9028
K=16	0.997332	0.987957	0.970388	0.890902
K=16	0.998799	0.985657	0.993125	0.921095
K=16	0.997917	0.98975	0.961002	0.895553
K=16	0.998998	0.989281	0.965386	0.889239
K=16	0.999599	0.977968	0.965345	0.89936
K=16	0.9966	0.974092	0.984375	0.928543
K=16	0.997565	0.965728	0.965832	0.852832
K=16	0.994179	0.960384	0.969359	0.919625
K=16	0.998199	0.985625	0.952672	0.921414
K=16	0.997195	0.970443	0.957583	0.914
K=16	0.99839	0.965251	0.95204	0.894089
K=16	0.997997	0.980688	0.96	0.919768
K=16	0.998996	0.971417	0.966587	0.91697
K=16	0.99839	0.973708	0.978591	0.908763
K=16	0.9972	0.959736	0.968197	0.944375
K=16	0.986458	0.962292	0.972606	0.853462
K=16	0.997313	0.969212	0.967748	0.882812
K=16	0.999388	0.961985	0.982772	0.892727
K=16	0.999396	0.985548	0.963542	0.9306
K=16	0.996399	0.970399	0.967972	0.936298
K=16	0.997374	0.972973	0.962185	0.868559
K=16	0.9994	0.961648	0.944243	0.901469
K=16	1	0.976396	0.972625	0.896434
K=16	0.998783	0.978125	0.971919	0.954141
K=16	0.996486	0.98789	0.970411	0.852625
K=16	0.998333	0.966136	0.947411	0.901771
K=16	0.9998	0.970925	0.977152	0.942508
K=16	0.98789	0.986813	0.958534	0.896434
K=16	0.99376	0.969604	0.96634	0.92212
K=16	0.997182	0.985417	0.926535	0.896829
K=16	0.998572	0.978182	0.967082	0.923729
K=16	0.998174	0.986043	0.971554	0.906463
K=16	0.997383	0.96634	0.945578	0.956284
K=16	0.988929	0.971967	0.980992	0.949819
K=16	0.997756	0.988711	0.978586	0.932727
K=16	0.997796	0.987013	0.966587	0.906851
K=16	0.998595	0.991597	0.969828	0.938808
K=16	1	0.991477	0.964489	0.91226
K=16	0.9906	0.973333	0.960808	0.919912
K=16	0.998384	0.991723	0.975561	0.920272
K=16	1	0.969583	0.971032	0.921266
K=16	0.997399	0.989665	0.963986	0.8748
K=16	0.997268	0.966667	0.94101	0.918277
K=16	1	0.976744	0.98	0.893617
K=16	0.999599	0.978992	0.971216	0.908227
K=16	0.998949	0.9794	0.954308	0.9476
K=16	0.99752	0.983232	0.970303	0.911659
K=16	1	0.99157	0.965909	0.878009
K=16	0.991919	0.966952	0.9606	0.906602
K=16	1	0.983593	0.970779	0.871717
K=16	0.998985	0.960227	0.962139	0.907
K=16	0.9994	0.986667	0.967748	0.897636
K=16	0.9936	0.991268	0.956548	0.926571
K=16	0.999396	0.978299	0.977858	0.895358
K=16	0.997172	0.996458	0.97537	0.885387
K=16	0.99979	0.978979	0.967156	0.874541
K=16	0.998153	0.979302	0.968485	0.892557
K=16	0.999597	0.980769	0.98303	0.946061
K=16	0.997987	0.997286	0.971591	0.894073
K=16	0.99839	0.983671	0.962	0.89372
K=16	1	0.980416	0.966787	0.848958
K=16	0.999384	0.979414	0.962985	0.930804
K=16	0.997182	0.967844	0.947779	0.902489
K=16	1	0.952324	0.969752	0.879105
K=16	0.997708	0.989161	0.96949	0.900579
K=16	0.998182	0.979823	0.985978	0.915487
K=16	0.998798	0.993994	0.977118	0.910076
K=16	0.99388	0.957848	0.992573	0.91951
K=16	0.999195	0.94945	0.966162	0.9076
K=16	1	0.993846	0.969089	0.852067
K=16	0.996795	0.98625	0.991546	0.840177
K=16	0.999596	0.988195	0.962381	0.893229
K=16	0.997212	0.990625	0.954546	0.94062
K=16	1	0.948326	0.961141	0.895556
K=16	0.9888	0.973129	0.962762	0.952899
K=16	0.996347	0.986593	0.9738	0.935129
K=16	0.999388	0.971354	0.955154	0.933573
K=16	0.998394	0.990991	0.959742	0.8402
K=16	0.999797	0.988687	0.957976	0.931457
K=16	1	0.988051	0.983333	0.906869
K=16	0.997971	0.986201	0.978322	0.909483
K=16	1	0.973737	0.95798	0.909903
K=16	0.99938	0.988571	0.986465	0.885266
K=16	0.997396	0.97491	0.944511	0.926314
K=16	0.998197	0.958661	0.928805	0.923904
K=16	0.99796	0.967273	0.969	0.941977
K=16	0.998384	0.984375	0.938702	0.959
K=16	1	0.980874	0.963365	0.949418
K=16	1	0.977263	0.964543	0.918222
K=16	0.995942	0.967472	0.985978	0.8786
K=16	0.993695	0.992573	0.991386	0.941626
K=16	0.9996	0.980911	0.974638	0.891957
K=16	0.995556	0.976655	0.943958	0.944199
K=16	1	0.982843	0.971591	0.951288
K=16	0.999188	0.982372	0.979192	0.937172
K=16	0.99796	0.99179	0.973958	0.883775
K=16	0.994598	0.988325	0.959135	0.908253
K=16	0.997576	0.993304	0.9478	0.925523
K=16	0.9972	0.994626	0.958937	0.912084
K=16	0.996364	0.971837	0.979727	0.869766
K=16	1	0.985843	0.945178	0.950186
K=16	0.999797	0.97375	0.9684	0.903003
K=16	0.995556	0.993695	0.957783	0.920473
K=16	0.997947	0.978495	0.971554	0.904848
K=16	0.999594	0.991042	0.957783	0.9266
K=16	0.998498	0.98101	0.967071	0.944712
K=16	1	0.983878	0.965586	0.936364
K=16	1	0.960314	0.98101	0.85287
K=16	0.995797	0.978	0.967987	0.950823
K=16	1	0.983272	0.942577	0.927713
K=16	0.996144	0.949979	0.955417	0.860899
K=16	0.999396	0.962256	0.961956	0.947677
K=16	0.991997	0.967182	0.972501	0.863782
K=16	0.9996	0.980168	0.97552	0.922369
K=16	0.998998	0.984295	0.963542	0.896347
K=16	0.999399	0.974745	0.980722	0.916908
K=16	0.99719	0.983871	0.981993	0.901989
K=16	0.995998	0.978121	0.9766	0.922282
K=16	0.998197	0.98399	0.959454	0.957576
K=16	0.996194	0.974779	0.95038	0.899596
K=16	0.997199	0.973112	0.975311	0.924716
K=16	0.997987	0.966749	0.955929	0.922078
K=16	0.9992	0.992086	0.962139	0.933561
K=16	0.999799	0.957899	0.9888	0.8746
K=16	1	0.986864	0.948718	0.899015
K=16	0.998798	0.976671	0.969952	0.898182
K=16	0.998377	0.975724	0.983464	0.937198
K=16	1	0.98619	0.968187	0.941106
K=16	1	0.976643	0.957374	0.921616
K=16	1	0.978182	0.960737	0.917869
K=16	1	0.9812	0.983	0.896434
K=16	0.9994	0.979193	0.943798	0.94404
K=16	0.994398	0.977	0.968599	0.928141
K=16	0.99752	0.986579	0.969899	0.837359
K=16	0.994663	0.979414	0.975561	0.873501
K=16	1	0.975164	0.9828	0.915953
K=16	0.998174	0.989784	0.977191	0.908227
K=16	0.998377	0.981085	0.966747	0.934516
K=16	1	0.982085	0.954182	0.8628
K=16	0.999384	0.982222	0.956981	0.898182
K=16	0.996795	0.995593	0.9784	0.926108
K=16	0.995074	0.991667	0.980128	0.924729
K=16	1	0.987598	0.967917	0.900241
K=16	1	0.976023	0.982973	0.848856
K=16	0.995151	0.99438	0.980722	0.895129
K=16	0.991875	0.974149	0.965177	0.889201
K=16	0.994583	0.977564	0.960145	0.945859
K=16	1	0.985998	0.989562	0.913489
K=16	1	0.979526	0.924729	0.927338
K=16	0.998553	0.982864	0.976391	0.9324
K=16	0.9976	0.982752	0.972389	0.880606
K=16	0.998174	0.972678	0.971789	0.897359
K=16	0.996716	0.980114	0.969551	0.919711
K=16	0.998996	0.98303	0.9825	0.901212
K=16	0.996144	0.974576	0.9592	0.88599
K=16	0.998783	0.994115	0.972989	0.958128
K=16	0.999192	0.979192	0.9719	0.894748
K=16	0.997999	0.968316	0.9764	0.909893
K=16	1	0.983897	0.979911	0.913662
K=16	0.999594	0.971216	0.920215	0.880457
K=16	1	0.98101	0.980731	0.921798
K=16	0.998792	0.986759	0.94847	0.872149
K=16	0.999394	0.982424	0.935296	0.916465
K=16	0.994343	0.97511	0.969892	0.856943
[truncated: 4,003 more rows]

## Sheet: Boot_SBP_CCR
Result	SD=5	SD=10	SD=15	SD=20
K=16	0.93	0.83	0.85	0.85
K=16	0.93	0.83	0.83	0.87
K=16	0.9	0.88	0.88	0.76
K=16	0.96	0.8	0.84	0.83
K=16	0.89	0.82	0.86	0.9
K=16	0.89	0.91	0.87	0.86
K=16	0.92	0.87	0.86	0.88
K=16	0.93	0.9	0.8	0.85
K=16	0.93	0.84	0.86	0.87
K=16	0.92	0.92	0.81	0.85
K=16	0.95	0.89	0.88	0.85
K=16	0.97	0.89	0.92	0.94
K=16	0.9	0.81	0.84	0.83
K=16	0.93	0.86	0.84	0.83
K=16	0.92	0.85	0.91	0.9
K=16	0.95	0.82	0.88	0.79
K=16	0.93	0.81	0.87	0.86
K=16	0.87	0.85	0.85	0.81
K=16	0.93	0.91	0.79	0.87
K=16	0.9	0.85	0.87	0.83
K=16	0.93	0.89	0.85	0.81
K=16	0.98	0.87	0.85	0.84
K=16	0.95	0.92	0.84	0.85
K=16	0.99	0.85	0.84	0.91
K=16	0.92	0.9	0.87	0.82
K=16	0.89	0.91	0.88	0.87
K=16	0.95	0.85	0.87	0.82
K=16	0.89	0.94	0.88	0.88
K=16	0.94	0.93	0.86	0.85
K=16	0.91	0.88	0.88	0.9
K=16	0.92	0.91	0.85	0.83
K=16	0.99	0.85	0.82	0.87
K=16	0.96	0.91	0.79	0.87
K=16	0.88	0.96	0.84	0.84
K=16	0.94	0.85	0.9	0.85
K=16	0.93	0.9	0.81	0.88
K=16	0.89	0.87	0.9	0.84
K=16	0.93	0.81	0.82	0.89
K=16	0.91	0.91	0.87	0.85
K=16	0.93	0.87	0.77	0.89
K=16	0.91	0.9	0.82	0.7
K=16	0.9	0.86	0.91	0.84
K=16	0.91	0.87	0.85	0.82
K=16	0.89	0.88	0.77	0.86
K=16	0.95	0.88	0.79	0.91
K=16	0.94	0.92	0.75	0.86
K=16	0.91	0.86	0.83	0.89
K=16	0.97	0.89	0.87	0.81
K=16	0.91	0.88	0.85	0.86
K=16	0.94	0.88	0.85	0.81
K=16	0.96	0.87	0.78	0.8
K=16	0.9	0.82	0.91	0.85
K=16	0.94	0.88	0.82	0.82
K=16	0.9	0.84	0.83	0.85
K=16	0.9	0.94	0.89	0.86
K=16	0.9	0.87	0.81	0.83
K=16	0.97	0.88	0.82	0.86
K=16	0.96	0.89	0.86	0.85
K=16	0.99	0.85	0.84	0.9
K=16	0.86	0.93	0.87	0.86
K=16	0.92	0.85	0.77	0.79
K=16	0.91	0.89	0.83	0.85
K=16	0.91	0.86	0.92	0.76
K=16	0.9	0.89	0.87	0.84
K=16	0.93	0.89	0.89	0.86
K=16	0.97	0.86	0.9	0.9
K=16	0.86	0.86	0.9	0.8
K=16	0.9	0.81	0.84	0.78
K=16	0.95	0.85	0.89	0.82
K=16	0.95	0.85	0.83	0.87
K=16	0.93	0.9	0.86	0.9
K=16	0.88	0.81	0.84	0.87
K=16	0.95	0.94	0.86	0.88
K=16	0.89	0.8	0.73	0.8
K=16	0.95	0.88	0.8	0.83
K=16	0.91	0.9	0.9	0.8
K=16	0.91	0.83	0.86	0.86
K=16	0.88	0.86	0.88	0.86
K=16	0.96	0.88	0.9	0.83
K=16	0.92	0.81	0.78	0.87
K=16	0.92	0.89	0.79	0.86
K=16	0.94	0.92	0.85	0.88
K=16	0.88	0.86	0.84	0.85
K=16	0.95	0.88	0.85	0.87
K=16	0.92	0.86	0.84	0.87
K=16	0.95	0.85	0.9	0.88
K=16	0.9	0.86	0.9	0.87
K=16	0.85	0.87	0.84	0.83
K=16	0.95	0.87	0.82	0.83
K=16	0.95	0.87	0.85	0.72
K=16	0.95	0.83	0.87	0.86
K=16	0.93	0.9	0.9	0.79
K=16	0.91	0.83	0.82	0.84
K=16	0.89	0.81	0.88	0.84
K=16	0.95	0.82	0.85	0.82
K=16	0.88	0.85	0.86	0.86
K=16	0.88	0.87	0.86	0.87
K=16	0.92	0.87	0.84	0.82
K=16	0.91	0.79	0.89	0.75
K=16	0.89	0.89	0.85	0.82
K=16	0.88	0.86	0.88	0.81
K=16	0.93	0.84	0.84	0.92
K=16	0.92	0.83	0.84	0.84
K=16	0.93	0.85	0.87	0.86
K=16	0.92	0.86	0.83	0.87
K=16	0.92	0.86	0.89	0.86
K=16	0.95	0.86	0.86	0.81
K=16	0.87	0.82	0.8	0.83
K=16	0.9	0.95	0.84	0.9
K=16	0.91	0.91	0.85	0.85
K=16	0.92	0.78	0.88	0.81
K=16	0.94	0.88	0.94	0.88
K=16	0.9	0.86	0.83	0.85
K=16	0.93	0.9	0.84	0.8
K=16	0.96	0.92	0.9	0.85
K=16	0.93	0.81	0.83	0.8
K=16	0.9	0.86	0.87	0.85
K=16	0.9	0.87	0.86	0.82
K=16	0.85	0.91	0.84	0.91
K=16	0.96	0.88	0.85	0.87
K=16	0.88	0.79	0.91	0.8
K=16	0.94	0.88	0.85	0.86
K=16	0.93	0.82	0.87	0.84
K=16	0.91	0.82	0.9	0.83
K=16	0.95	0.88	0.84	0.85
K=16	0.88	0.85	0.85	0.81
K=16	0.96	0.88	0.87	0.85
K=16	0.94	0.84	0.85	0.88
K=16	0.89	0.81	0.84	0.83
K=16	0.94	0.88	0.79	0.86
K=16	0.9	0.89	0.84	0.83
K=16	0.9	0.85	0.83	0.81
K=16	0.92	0.85	0.84	0.91
K=16	0.88	0.82	0.88	0.86
K=16	0.92	0.76	0.83	0.85
K=16	0.96	0.87	0.9	0.88
K=16	0.93	0.89	0.9	0.86
K=16	0.94	0.89	0.88	0.85
K=16	0.94	0.84	0.83	0.87
K=16	0.92	0.88	0.83	0.8
K=16	0.96	0.89	0.86	0.79
K=16	0.93	0.88	0.86	0.85
K=16	0.93	0.85	0.86	0.76
K=16	0.93	0.87	0.86	0.8
K=16	0.92	0.89	0.78	0.85
K=16	0.94	0.89	0.86	0.82
K=16	0.9	0.89	0.87	0.83
K=16	0.9	0.81	0.88	0.9
K=16	0.9	0.86	0.82	0.82
K=16	0.86	0.81	0.84	0.79
K=16	0.91	0.91	0.86	0.79
K=16	0.92	0.84	0.91	0.8
K=16	0.96	0.88	0.87	0.82
K=16	0.95	0.89	0.79	0.84
K=16	0.96	0.87	0.89	0.89
K=16	0.87	0.87	0.91	0.88
K=16	0.94	0.87	0.84	0.86
K=16	0.92	0.88	0.86	0.8
K=16	0.9	0.89	0.8	0.84
K=16	0.9	0.83	0.88	0.85
K=16	0.94	0.82	0.87	0.86
K=16	0.94	0.89	0.82	0.84
K=16	0.95	0.82	0.79	0.85
K=16	0.93	0.8	0.8	0.87
K=16	0.91	0.86	0.9	0.86
K=16	0.92	0.87	0.87	0.87
K=16	0.89	0.85	0.82	0.83
K=16	0.92	0.9	0.87	0.85
K=16	0.91	0.86	0.83	0.81
K=16	0.93	0.9	0.87	0.85
K=16	0.91	0.8	0.89	0.83
K=16	0.93	0.81	0.88	0.86
K=16	0.92	0.92	0.84	0.83
K=16	0.91	0.79	0.82	0.8
K=16	0.95	0.86	0.81	0.79
K=16	0.94	0.83	0.86	0.86
K=16	0.94	0.89	0.84	0.87
K=16	0.93	0.83	0.85	0.89
K=16	0.99	0.88	0.82	0.81
K=16	0.89	0.81	0.78	0.83
K=16	0.9	0.79	0.85	0.84
K=16	0.95	0.8	0.86	0.84
K=16	0.93	0.86	0.84	0.86
K=16	0.89	0.85	0.82	0.78
K=16	0.92	0.8	0.83	0.88
K=16	0.92	0.88	0.83	0.82
K=16	0.93	0.86	0.88	0.84
K=16	0.93	0.8	0.87	0.75
K=16	0.95	0.85	0.78	0.8
K=16	0.91	0.76	0.82	0.85
K=16	0.95	0.92	0.82	0.84
K=16	0.86	0.86	0.86	0.79
K=16	0.97	0.86	0.86	0.8
K=16	0.91	0.85	0.87	0.88
K=16	0.91	0.83	0.86	0.87
K=16	0.89	0.89	0.84	0.86
K=16	0.93	0.76	0.84	0.86
K=16	0.98	0.9	0.85	0.82
K=16	0.93	0.84	0.87	0.86
K=16	0.92	0.89	0.83	0.82
K=16	0.9	0.82	0.85	0.81
K=16	0.93	0.79	0.87	0.88
K=16	0.9	0.81	0.87	0.89
K=16	0.93	0.87	0.8	0.87
K=16	0.95	0.89	0.89	0.89
K=16	0.94	0.92	0.84	0.84
K=16	0.89	0.83	0.8	0.84
K=16	0.92	0.89	0.84	0.8
K=16	0.96	0.85	0.81	0.88
K=16	0.92	0.87	0.83	0.81
K=16	0.92	0.86	0.87	0.87
K=16	0.95	0.87	0.78	0.88
K=16	0.9	0.86	0.88	0.84
K=16	0.91	0.9	0.88	0.86
K=16	0.92	0.89	0.91	0.82
K=16	0.91	0.92	0.89	0.86
K=16	0.94	0.87	0.79	0.86
K=16	0.93	0.85	0.85	0.86
K=16	0.95	0.84	0.85	0.81
K=16	0.92	0.87	0.86	0.89
K=16	0.95	0.82	0.79	0.83
K=16	0.87	0.87	0.87	0.87
K=16	0.88	0.89	0.82	0.86
K=16	0.88	0.92	0.88	0.77
K=16	0.97	0.83	0.87	0.88
K=16	0.91	0.84	0.86	0.85
K=16	0.92	0.88	0.81	0.86
K=16	0.93	0.84	0.81	0.87
K=16	0.92	0.9	0.86	0.88
K=16	0.92	0.85	0.91	0.81
K=16	0.94	0.84	0.86	0.77
K=16	0.93	0.82	0.85	0.81
K=16	0.86	0.88	0.88	0.83
K=16	0.94	0.88	0.86	0.84
K=16	0.94	0.85	0.83	0.85
K=16	0.95	0.8	0.89	0.83
K=16	0.89	0.85	0.88	0.81
K=16	0.94	0.89	0.79	0.78
K=16	0.88	0.92	0.82	0.84
K=16	0.9	0.85	0.88	0.82
K=16	0.91	0.93	0.82	0.89
K=16	0.85	0.88	0.87	0.83
K=16	0.91	0.9	0.89	0.85
K=16	0.93	0.83	0.89	0.84
K=16	0.94	0.85	0.82	0.83
K=16	0.89	0.85	0.88	0.82
K=16	0.94	0.85	0.83	0.89
K=16	0.93	0.82	0.8	0.83
K=16	0.94	0.82	0.82	0.83
K=16	0.96	0.82	0.85	0.9
K=16	0.9	0.91	0.85	0.82
K=16	0.9	0.86	0.93	0.85
K=16	0.9	0.82	0.86	0.83
K=16	0.95	0.84	0.86	0.82
K=16	0.9	0.88	0.88	0.81
K=16	0.92	0.88	0.83	0.84
K=16	0.94	0.88	0.82	0.89
K=16	0.92	0.83	0.82	0.82
K=16	0.9	0.92	0.86	0.93
K=16	0.92	0.8	0.81	0.82
K=16	0.89	0.82	0.89	0.86
K=16	0.99	0.84	0.82	0.86
K=16	0.95	0.88	0.9	0.85
K=16	0.96	0.93	0.88	0.87
K=16	0.87	0.88	0.85	0.84
K=16	0.9	0.84	0.75	0.8
K=16	0.96	0.86	0.88	0.81
K=16	0.95	0.88	0.82	0.82
K=16	0.92	0.84	0.83	0.84
K=16	0.93	0.84	0.87	0.81
K=16	0.92	0.86	0.79	0.7
K=16	0.93	0.87	0.9	0.82
K=16	0.93	0.8	0.83	0.83
K=16	0.96	0.78	0.84	0.88
K=16	0.91	0.91	0.86	0.78
K=16	0.91	0.91	0.86	0.85
K=16	0.91	0.91	0.84	0.84
K=16	0.92	0.81	0.85	0.72
K=16	0.91	0.86	0.81	0.86
K=16	0.94	0.87	0.87	0.85
K=16	0.92	0.88	0.87	0.84
K=16	0.97	0.89	0.87	0.86
K=16	0.9	0.86	0.79	0.87
K=16	0.95	0.82	0.84	0.89
K=16	0.93	0.84	0.81	0.82
K=16	0.92	0.81	0.89	0.87
K=16	0.9	0.91	0.86	0.88
K=16	0.93	0.89	0.82	0.86
K=16	0.93	0.91	0.83	0.81
K=16	0.9	0.85	0.88	0.82
K=16	0.91	0.86	0.84	0.88
K=16	0.9	0.81	0.85	0.83
K=16	0.88	0.86	0.8	0.8
K=16	0.94	0.76	0.86	0.8
K=16	0.94	0.92	0.85	0.8
K=16	0.9	0.88	0.86	0.86
K=16	0.94	0.87	0.78	0.75
K=16	0.93	0.91	0.88	0.81
K=16	0.92	0.88	0.86	0.8
K=16	0.91	0.9	0.88	0.85
K=16	0.95	0.91	0.78	0.74
K=16	0.94	0.82	0.81	0.88
K=16	0.95	0.87	0.81	0.83
K=16	0.95	0.85	0.87	0.84
K=16	0.92	0.85	0.83	0.81
K=16	0.9	0.83	0.81	0.84
K=16	0.89	0.83	0.86	0.84
K=16	0.93	0.9	0.87	0.84
K=16	0.9	0.85	0.86	0.87
K=16	0.92	0.89	0.84	0.85
K=16	0.91	0.87	0.85	0.84
K=16	0.93	0.86	0.87	0.88
K=16	0.93	0.85	0.86	0.87
K=16	0.94	0.84	0.82	0.88
K=16	0.96	0.77	0.82	0.88
K=16	0.92	0.9	0.85	0.76
K=16	0.92	0.84	0.86	0.82
K=16	0.9	0.82	0.84	0.81
K=16	0.94	0.87	0.88	0.81
K=16	0.9	0.79	0.83	0.9
K=16	0.87	0.86	0.84	0.83
K=16	0.91	0.89	0.87	0.82
K=16	0.88	0.87	0.89	0.86
K=16	0.88	0.92	0.88	0.85
K=16	0.93	0.84	0.93	0.82
K=16	0.93	0.82	0.86	0.84
K=16	0.9	0.84	0.9	0.84
K=16	0.88	0.88	0.8	0.85
K=16	0.95	0.91	0.87	0.86
K=16	0.88	0.86	0.87	0.84
K=16	0.94	0.85	0.79	0.82
K=16	0.91	0.86	0.85	0.88
K=16	0.95	0.83	0.87	0.85
K=16	0.92	0.89	0.83	0.77
K=16	0.91	0.88	0.85	0.82
K=16	0.92	0.81	0.82	0.82
K=16	0.94	0.84	0.88	0.82
K=16	0.95	0.89	0.85	0.85
K=16	0.9	0.88	0.91	0.85
K=16	0.92	0.91	0.87	0.77
K=16	0.93	0.88	0.86	0.81
K=16	0.87	0.9	0.85	0.91
K=16	0.86	0.78	0.88	0.91
K=16	0.94	0.84	0.89	0.85
K=16	0.94	0.86	0.82	0.79
K=16	0.92	0.85	0.87	0.82
K=16	0.95	0.87	0.79	0.81
K=16	0.94	0.89	0.87	0.86
K=16	0.89	0.86	0.83	0.81
K=16	0.93	0.85	0.85	0.87
K=16	0.84	0.85	0.84	0.85
K=16	0.97	0.87	0.83	0.87
K=16	0.91	0.84	0.83	0.89
K=16	0.84	0.82	0.76	0.81
K=16	0.85	0.87	0.89	0.82
K=16	0.91	0.85	0.88	0.84
K=16	0.93	0.85	0.89	0.9
K=16	0.91	0.94	0.78	0.83
K=16	0.93	0.87	0.89	0.78
K=16	0.91	0.89	0.88	0.89
K=16	0.96	0.87	0.83	0.84
K=16	0.95	0.83	0.82	0.83
K=16	0.88	0.91	0.83	0.84
K=16	0.94	0.86	0.87	0.86
K=16	0.91	0.89	0.87	0.82
K=16	0.92	0.87	0.83	0.87
K=16	0.84	0.84	0.78	0.88
K=16	0.91	0.83	0.81	0.85
K=16	0.87	0.87	0.83	0.86
K=16	0.93	0.9	0.81	0.86
K=16	0.93	0.9	0.92	0.86
K=16	0.89	0.9	0.86	0.87
K=16	0.94	0.82	0.85	0.8
K=16	0.91	0.88	0.81	0.89
K=16	0.95	0.84	0.81	0.77
K=16	0.92	0.86	0.91	0.85
K=16	0.92	0.85	0.79	0.78
K=16	0.84	0.79	0.89	0.83
K=16	0.91	0.85	0.86	0.85
K=16	0.9	0.93	0.74	0.83
K=16	0.91	0.85	0.8	0.83
K=16	0.97	0.92	0.9	0.86
K=16	0.92	0.88	0.85	0.84
K=16	0.96	0.83	0.83	0.81
K=16	0.91	0.8	0.81	0.83
K=16	0.92	0.86	0.9	0.82
K=16	0.89	0.87	0.81	0.82
K=16	0.91	0.85	0.83	0.77
K=16	0.9	0.85	0.81	0.84
K=16	0.97	0.88	0.81	0.86
K=16	0.91	0.82	0.87	0.81
K=16	0.92	0.86	0.92	0.91
K=16	0.93	0.95	0.78	0.87
K=16	0.92	0.91	0.84	0.87
K=16	0.95	0.83	0.8	0.8
K=16	0.89	0.75	0.94	0.79
K=16	0.91	0.84	0.85	0.91
K=16	0.9	0.85	0.88	0.76
K=16	0.9	0.82	0.79	0.91
K=16	0.96	0.85	0.86	0.81
K=16	0.89	0.84	0.88	0.83
K=16	0.94	0.86	0.93	0.86
K=16	0.93	0.86	0.87	0.89
K=16	0.94	0.84	0.84	0.78
K=16	0.95	0.82	0.86	0.82
K=16	0.89	0.89	0.88	0.79
K=16	0.91	0.87	0.89	0.78
K=16	0.92	0.82	0.82	0.82
K=16	0.91	0.85	0.8	0.77
K=16	0.92	0.86	0.83	0.86
K=16	0.9	0.8	0.89	0.82
K=16	0.91	0.86	0.86	0.91
K=16	0.96	0.75	0.84	0.87
K=16	0.91	0.82	0.88	0.82
K=16	0.96	0.87	0.88	0.83
K=16	0.96	0.79	0.89	0.8
K=16	0.9	0.9	0.89	0.8
K=16	0.95	0.9	0.86	0.9
K=16	0.86	0.85	0.78	0.84
K=16	0.86	0.8	0.86	0.86
K=16	0.92	0.89	0.87	0.82
K=16	0.93	0.89	0.86	0.86
K=16	0.93	0.85	0.79	0.85
K=16	0.89	0.86	0.78	0.84
K=16	0.92	0.85	0.8	0.92
K=16	0.9	0.88	0.87	0.79
K=16	0.88	0.86	0.91	0.82
K=16	0.95	0.87	0.9	0.82
K=16	0.95	0.9	0.77	0.83
K=16	0.93	0.78	0.84	0.83
K=16	0.88	0.81	0.72	0.88
K=16	0.86	0.88	0.85	0.81
K=16	0.95	0.83	0.84	0.86
K=16	0.93	0.83	0.84	0.87
K=16	0.89	0.79	0.87	0.81
K=16	0.94	0.89	0.85	0.84
K=16	0.98	0.86	0.84	0.89
K=16	0.93	0.93	0.77	0.85
K=16	0.93	0.85	0.79	0.83
K=16	0.88	0.89	0.87	0.84
K=16	0.9	0.91	0.8	0.89
K=16	0.93	0.89	0.86	0.82
K=16	0.93	0.89	0.87	0.9
K=16	0.95	0.84	0.86	0.82
K=16	0.92	0.85	0.85	0.86
K=16	0.89	0.83	0.8	0.78
K=16	0.95	0.83	0.87	0.92
K=16	0.95	0.88	0.87	0.82
K=16	0.91	0.83	0.86	0.77
K=16	0.95	0.79	0.85	0.89
K=16	0.92	0.84	0.89	0.89
K=16	0.89	0.83	0.89	0.87
K=16	0.9	0.84	0.82	0.84
K=16	0.97	0.83	0.82	0.87
K=16	0.91	0.89	0.84	0.88
K=16	0.92	0.91	0.86	0.83
K=16	0.94	0.84	0.86	0.83
K=16	0.91	0.89	0.89	0.81
K=16	0.9	0.89	0.83	0.8
K=16	0.94	0.87	0.88	0.85
K=16	0.92	0.83	0.9	0.85
K=16	0.89	0.79	0.85	0.85
K=16	0.93	0.88	0.91	0.84
K=16	0.92	0.91	0.82	0.84
K=16	0.88	0.82	0.87	0.77
K=16	0.93	0.86	0.87	0.85
K=16	0.95	0.81	0.86	0.78
K=16	0.95	0.87	0.82	0.84
K=16	0.87	0.85	0.86	0.92
K=16	0.94	0.88	0.87	0.85
K=16	0.9	0.81	0.88	0.88
K=16	0.9	0.89	0.87	0.82
K=16	0.91	0.86	0.86	0.84
K=16	0.91	0.84	0.86	0.82
K=16	0.9	0.81	0.84	0.85
K=16	0.93	0.88	0.86	0.85
K=16	0.9	0.84	0.84	0.87
K=16	0.95	0.92	0.84	0.86
K=16	0.92	0.89	0.88	0.85
K=16	0.91	0.89	0.83	0.85
K=16	0.87	0.89	0.9	0.82
K=16	0.95	0.88	0.81	0.92
K=16	0.92	0.81	0.87	0.81
K=16	0.91	0.87	0.81	0.84
K=16	0.95	0.86	0.89	0.84
K=16	0.92	0.84	0.83	0.76
K=16	0.9	0.78	0.76	0.78
K=16	0.92	0.81	0.88	0.84
K=16	0.94	0.9	0.89	0.92
K=16	0.87	0.89	0.9	0.81
K=16	0.94	0.89	0.88	0.86
K=16	0.9	0.87	0.8	0.78
K=16	0.92	0.83	0.83	0.86
K=16	0.92	0.86	0.86	0.82
K=16	0.9	0.87	0.81	0.94
K=16	0.89	0.84	0.77	0.76
K=16	0.93	0.81	0.83	0.82
K=16	0.9	0.9	0.85	0.87
K=16	0.94	0.91	0.81	0.84
K=16	0.91	0.83	0.89	0.82
K=16	0.95	0.86	0.76	0.81
K=16	0.93	0.87	0.81	0.84
K=16	0.86	0.85	0.84	0.79
K=16	0.93	0.85	0.84	0.84
K=16	0.93	0.88	0.82	0.84
K=16	0.86	0.88	0.8	0.84
K=16	0.92	0.86	0.89	0.81
K=16	0.91	0.89	0.87	0.86
K=16	0.9	0.86	0.82	0.84
K=16	0.89	0.86	0.92	0.85
K=16	0.9	0.87	0.88	0.84
K=16	0.92	0.83	0.9	0.89
K=16	0.92	0.93	0.87	0.84
K=16	0.9	0.92	0.88	0.91
K=16	0.93	0.86	0.83	0.84
K=16	0.94	0.81	0.86	0.88
K=16	0.91	0.83	0.8	0.84
K=16	0.94	0.88	0.83	0.79
K=16	0.91	0.84	0.89	0.86
K=16	0.95	0.9	0.89	0.83
K=16	0.92	0.88	0.77	0.91
K=16	0.93	0.9	0.84	0.87
K=16	0.94	0.9	0.77	0.85
K=16	0.9	0.91	0.84	0.86
K=16	0.89	0.8	0.9	0.86
K=16	0.96	0.84	0.81	0.81
K=16	0.96	0.93	0.9	0.88
K=16	0.9	0.87	0.84	0.87
K=16	0.91	0.88	0.81	0.83
K=16	0.88	0.82	0.9	0.83
K=16	0.94	0.84	0.85	0.81
K=16	0.91	0.86	0.8	0.83
K=16	0.9	0.9	0.89	0.91
K=16	0.95	0.88	0.87	0.87
K=16	0.88	0.84	0.84	0.86
K=16	0.89	0.85	0.82	0.82
K=16	0.96	0.88	0.78	0.85
K=16	0.96	0.88	0.84	0.85
K=16	0.88	0.85	0.87	0.85
K=16	0.97	0.84	0.83	0.83
K=16	0.97	0.82	0.83	0.84
K=16	0.87	0.83	0.84	0.89
K=16	0.9	0.89	0.86	0.9
K=16	0.95	0.88	0.85	0.85
K=16	0.91	0.91	0.89	0.88
K=16	0.86	0.86	0.83	0.85
K=16	0.98	0.92	0.87	0.89
K=16	0.96	0.9	0.78	0.86
K=16	0.9	0.88	0.86	0.79
K=16	0.93	0.86	0.83	0.81
K=16	0.96	0.84	0.83	0.85
K=16	0.9	0.85	0.84	0.89
K=16	0.95	0.91	0.85	0.88
K=16	0.9	0.94	0.87	0.84
K=16	0.9	0.82	0.84	0.85
K=16	0.92	0.92	0.78	0.88
K=16	0.91	0.92	0.85	0.86
K=16	0.9	0.9	0.8	0.84
K=16	0.92	0.9	0.85	0.86
K=16	0.93	0.89	0.86	0.88
K=16	0.91	0.83	0.88	0.8
K=16	0.9	0.84	0.88	0.85
K=16	0.91	0.9	0.87	0.82
K=16	0.89	0.84	0.92	0.8
K=16	0.91	0.88	0.89	0.8
K=16	0.96	0.84	0.82	0.87
K=16	0.92	0.87	0.89	0.84
K=16	0.9	0.88	0.85	0.77
K=16	0.9	0.88	0.8	0.85
K=16	0.97	0.81	0.89	0.86
K=16	0.89	0.87	0.86	0.86
K=16	0.85	0.92	0.89	0.82
K=16	0.93	0.87	0.88	0.8
K=16	0.9	0.91	0.88	0.92
K=16	0.92	0.86	0.89	0.84
K=16	0.91	0.85	0.82	0.78
K=16	0.92	0.83	0.83	0.85
K=16	0.89	0.9	0.83	0.89
K=16	0.91	0.87	0.85	0.9
K=16	0.94	0.92	0.89	0.79
K=16	0.89	0.87	0.88	0.89
K=16	0.92	0.83	0.93	0.86
K=16	0.93	0.9	0.83	0.85
K=16	0.97	0.84	0.84	0.85
K=16	0.93	0.91	0.91	0.88
K=16	0.92	0.88	0.8	0.83
K=16	0.89	0.9	0.82	0.86
K=16	0.93	0.83	0.77	0.87
K=16	0.93	0.84	0.91	0.78
K=16	0.95	0.87	0.89	0.85
K=16	0.91	0.84	0.85	0.79
K=16	0.93	0.91	0.89	0.83
K=16	0.91	0.84	0.81	0.84
K=16	0.89	0.82	0.85	0.88
K=16	0.93	0.92	0.78	0.88
K=16	0.89	0.88	0.92	0.83
K=16	0.89	0.9	0.85	0.89
K=16	0.97	0.91	0.81	0.86
K=16	0.89	0.86	0.88	0.88
K=16	0.89	0.87	0.9	0.88
K=16	0.9	0.88	0.86	0.87
K=16	0.9	0.88	0.87	0.77
K=16	0.91	0.85	0.83	0.91
K=16	0.85	0.8	0.84	0.87
K=16	0.9	0.84	0.92	0.8
K=16	0.9	0.88	0.86	0.8
K=16	0.94	0.9	0.94	0.88
K=16	0.9	0.87	0.85	0.85
K=16	0.94	0.84	0.85	0.8
K=16	0.92	0.83	0.87	0.86
K=16	0.91	0.84	0.82	0.83
K=16	0.89	0.83	0.83	0.76
K=16	0.92	0.86	0.85	0.79
K=16	0.88	0.85	0.81	0.87
K=16	0.91	0.88	0.78	0.82
K=16	0.91	0.88	0.9	0.89
K=16	0.91	0.89	0.8	0.83
K=16	0.92	0.84	0.81	0.9
K=16	0.9	0.78	0.88	0.82
K=16	0.89	0.89	0.87	0.92
K=16	0.95	0.9	0.78	0.8
K=16	0.95	0.89	0.86	0.86
K=16	0.92	0.83	0.85	0.72
K=16	0.94	0.91	0.89	0.87
K=16	0.9	0.82	0.89	0.84
K=16	0.9	0.82	0.85	0.84
K=16	0.94	0.91	0.75	0.86
K=16	0.95	0.86	0.78	0.88
K=16	0.93	0.9	0.83	0.81
K=16	0.91	0.84	0.87	0.89
K=16	0.94	0.86	0.85	0.83
K=16	0.9	0.87	0.88	0.89
K=16	0.93	0.87	0.91	0.87
K=16	0.91	0.86	0.79	0.86
K=16	0.93	0.91	0.85	0.77
K=16	0.92	0.89	0.76	0.83
K=16	0.86	0.9	0.86	0.85
K=16	0.93	0.84	0.86	0.85
K=16	0.94	0.83	0.79	0.89
K=16	0.93	0.8	0.85	0.89
K=16	0.92	0.87	0.82	0.83
K=16	0.9	0.88	0.91	0.78
K=16	0.95	0.87	0.88	0.86
K=16	0.95	0.85	0.87	0.86
K=16	0.88	0.85	0.84	0.79
K=16	0.93	0.83	0.85	0.77
K=16	0.85	0.82	0.86	0.88
K=16	0.94	0.85	0.89	0.85
K=16	0.94	0.9	0.85	0.85
K=16	0.96	0.88	0.88	0.82
K=16	0.92	0.87	0.87	0.84
K=16	0.9	0.88	0.88	0.84
K=16	0.93	0.84	0.78	0.87
K=16	0.91	0.82	0.82	0.83
K=16	0.94	0.85	0.83	0.86
K=16	0.97	0.87	0.92	0.79
K=16	0.91	0.86	0.84	0.83
K=16	0.94	0.93	0.82	0.85
K=16	0.91	0.8	0.86	0.92
K=16	0.91	0.8	0.83	0.89
K=16	0.92	0.85	0.88	0.83
K=16	0.91	0.85	0.91	0.8
K=16	0.93	0.88	0.82	0.85
K=16	0.93	0.83	0.86	0.89
K=16	0.91	0.87	0.86	0.91
K=16	0.95	0.84	0.79	0.85
K=16	0.95	0.77	0.87	0.86
K=16	0.92	0.85	0.88	0.86
K=16	0.91	0.89	0.87	0.86
K=16	0.92	0.81	0.81	0.81
K=16	0.93	0.86	0.88	0.9
K=16	0.91	0.88	0.88	0.82
K=16	0.88	0.86	0.8	0.86
K=16	0.91	0.87	0.88	0.78
K=16	0.92	0.77	0.88	0.85
K=16	0.94	0.79	0.81	0.8
K=16	0.91	0.87	0.84	0.83
K=16	0.85	0.86	0.86	0.84
K=16	0.95	0.88	0.84	0.88
K=16	0.92	0.83	0.84	0.82
K=16	0.95	0.84	0.88	0.85
K=16	0.93	0.89	0.78	0.77
K=16	0.94	0.9	0.83	0.87
K=16	0.89	0.93	0.84	0.84
K=16	0.93	0.81	0.83	0.84
K=16	0.92	0.86	0.88	0.87
K=16	0.95	0.92	0.84	0.85
K=16	0.93	0.88	0.86	0.86
K=16	0.94	0.86	0.93	0.84
K=16	0.97	0.82	0.86	0.83
K=16	0.94	0.9	0.84	0.87
K=16	0.95	0.87	0.81	0.92
K=16	0.81	0.92	0.83	0.88
K=16	0.9	0.88	0.86	0.86
K=16	0.92	0.85	0.88	0.89
K=16	0.93	0.87	0.88	0.84
K=16	0.92	0.81	0.86	0.8
K=16	0.9	0.9	0.87	0.75
K=16	0.91	0.9	0.83	0.85
K=16	0.92	0.86	0.87	0.82
K=16	0.93	0.91	0.84	0.86
K=16	0.94	0.87	0.83	0.86
K=16	0.9	0.77	0.88	0.84
K=16	0.93	0.92	0.91	0.88
K=16	0.9	0.84	0.79	0.79
K=16	0.94	0.86	0.87	0.84
K=16	0.9	0.84	0.86	0.87
K=16	0.89	0.92	0.86	0.88
K=16	0.91	0.85	0.83	0.82
K=16	0.85	0.86	0.86	0.85
K=16	0.88	0.86	0.87	0.89
K=16	0.95	0.87	0.89	0.85
K=16	0.95	0.85	0.85	0.82
K=16	0.92	0.86	0.88	0.83
K=16	0.95	0.88	0.89	0.79
K=16	0.92	0.88	0.81	0.81
K=16	0.95	0.87	0.89	0.87
K=16	0.9	0.84	0.84	0.77
K=16	0.91	0.87	0.87	0.89
K=16	0.93	0.78	0.8	0.87
K=16	0.88	0.89	0.92	0.92
K=16	0.89	0.91	0.94	0.81
K=16	0.89	0.88	0.87	0.87
K=16	0.89	0.87	0.82	0.84
K=16	0.95	0.88	0.79	0.85
K=16	0.92	0.88	0.87	0.88
K=16	0.87	0.87	0.79	0.89
K=16	0.97	0.84	0.78	0.86
K=16	0.94	0.85	0.85	0.84
K=16	0.95	0.86	0.8	0.89
K=16	0.95	0.84	0.87	0.82
K=16	0.92	0.91	0.84	0.76
K=16	0.89	0.86	0.88	0.87
K=16	0.9	0.8	0.83	0.89
K=16	0.92	0.85	0.88	0.74
K=16	0.85	0.77	0.85	0.82
K=16	0.91	0.87	0.87	0.8
K=16	0.92	0.87	0.8	0.86
K=16	0.94	0.88	0.81	0.85
K=16	0.94	0.92	0.84	0.86
K=16	0.93	0.87	0.89	0.86
K=16	0.92	0.8	0.81	0.91
K=16	0.89	0.81	0.84	0.83
K=16	0.91	0.9	0.87	0.84
K=16	0.96	0.88	0.84	0.8
K=16	0.95	0.88	0.82	0.82
K=16	0.91	0.93	0.84	0.82
K=16	0.92	0.8	0.84	0.86
K=16	0.96	0.9	0.86	0.86
K=16	0.85	0.85	0.88	0.86
K=16	0.93	0.87	0.89	0.8
K=16	0.95	0.92	0.87	0.82
K=16	0.87	0.92	0.9	0.9
K=16	0.93	0.91	0.93	0.88
K=16	0.92	0.85	0.87	0.84
K=16	0.93	0.8	0.86	0.89
K=16	0.93	0.9	0.84	0.84
K=16	0.94	0.82	0.88	0.8
K=16	0.96	0.89	0.8	0.84
K=16	0.94	0.88	0.94	0.84
K=16	0.95	0.85	0.89	0.87
K=16	0.94	0.86	0.84	0.88
K=16	0.96	0.85	0.9	0.85
K=16	0.9	0.83	0.89	0.86
K=16	0.92	0.89	0.87	0.87
K=16	0.97	0.84	0.82	0.82
K=16	0.93	0.88	0.86	0.84
K=16	0.91	0.86	0.81	0.81
K=16	0.89	0.87	0.81	0.81
K=16	0.92	0.81	0.89	0.84
K=16	0.91	0.87	0.9	0.81
K=16	0.95	0.8	0.85	0.88
K=16	0.89	0.85	0.85	0.84
K=16	0.92	0.93	0.83	0.85
K=16	0.96	0.86	0.88	0.84
K=16	0.95	0.84	0.85	0.83
K=16	0.87	0.9	0.9	0.85
K=16	0.9	0.86	0.86	0.83
K=16	0.91	0.82	0.9	0.83
K=16	0.92	0.93	0.9	0.88
K=16	0.89	0.85	0.91	0.85
K=16	0.89	0.84	0.88	0.82
K=16	0.88	0.85	0.84	0.78
K=16	0.9	0.86	0.84	0.85
K=16	0.88	0.83	0.85	0.79
K=16	0.93	0.85	0.86	0.76
K=16	0.9	0.84	0.92	0.81
K=16	0.94	0.92	0.85	0.84
K=16	0.93	0.83	0.86	0.82
K=16	0.93	0.84	0.9	0.83
K=16	0.92	0.83	0.86	0.88
K=16	0.91	0.89	0.79	0.86
K=16	0.91	0.78	0.84	0.79
K=16	0.91	0.92	0.84	0.85
K=16	0.89	0.86	0.85	0.83
K=16	0.91	0.85	0.81	0.8
K=16	0.9	0.89	0.9	0.89
K=16	0.93	0.9	0.88	0.85
K=16	0.94	0.83	0.88	0.83
K=16	0.88	0.88	0.87	0.84
K=16	0.89	0.84	0.86	0.81
K=16	0.93	0.86	0.9	0.85
K=16	0.9	0.83	0.92	0.84
K=16	0.88	0.87	0.88	0.8
K=16	0.9	0.84	0.84	0.84
K=16	0.96	0.93	0.88	0.76
K=16	0.88	0.81	0.9	0.75
K=16	0.93	0.77	0.83	0.84
K=16	0.94	0.8	0.85	0.87
K=16	0.92	0.92	0.85	0.85
K=16	0.91	0.83	0.82	0.86
K=16	0.91	0.83	0.83	0.86
K=16	0.84	0.89	0.82	0.83
K=16	0.89	0.88	0.86	0.79
K=16	0.93	0.85	0.84	0.75
K=16	0.91	0.83	0.82	0.84
K=16	0.92	0.94	0.89	0.86
K=16	0.89	0.9	0.88	0.85
K=16	0.9	0.88	0.85	0.87
K=16	0.9	0.89	0.82	0.75
K=16	0.9	0.89	0.9	0.93
K=16	0.92	0.84	0.88	0.79
K=16	0.91	0.88	0.89	0.9
K=16	0.85	0.75	0.78	0.83
K=16	0.88	0.85	0.86	0.82
K=16	0.95	0.9	0.83	0.89
K=16	0.92	0.87	0.8	0.84
K=16	0.87	0.91	0.77	0.89
K=16	0.91	0.92	0.83	0.89
K=16	0.94	0.85	0.82	0.81
K=16	0.94	0.85	0.82	0.79
K=16	0.91	0.83	0.88	0.9
K=16	0.9	0.87	0.85	0.83
K=16	0.89	0.79	0.83	0.85
K=16	0.88	0.87	0.88	0.84
K=16	0.93	0.92	0.83	0.77
K=16	0.88	0.9	0.87	0.82
K=16	0.87	0.88	0.84	0.86
K=16	0.93	0.89	0.82	0.89
K=16	0.93	0.92	0.76	0.82
K=16	0.96	0.87	0.83	0.81
K=16	0.95	0.85	0.91	0.88
K=16	0.94	0.82	0.8	0.83
K=16	0.94	0.88	0.86	0.81
K=16	0.91	0.81	0.78	0.7
K=16	0.9	0.82	0.86	0.83
K=16	0.94	0.85	0.87	0.85
K=16	0.94	0.8	0.83	0.86
K=16	0.94	0.88	0.86	0.81
K=16	0.93	0.86	0.86	0.82
K=16	0.9	0.78	0.83	0.84
K=16	0.94	0.85	0.9	0.86
K=16	0.9	0.91	0.82	0.83
K=16	0.91	0.89	0.87	0.86
K=16	0.9	0.94	0.88	0.9
K=16	0.88	0.88	0.86	0.88
K=16	0.92	0.81	0.84	0.78
K=16	0.93	0.84	0.86	0.81
K=16	0.91	0.85	0.85	0.8
K=16	0.9	0.82	0.81	0.8
K=16	0.88	0.85	0.84	0.88
K=16	0.92	0.88	0.83	0.86
K=16	0.93	0.86	0.83	0.85
K=16	0.87	0.86	0.87	0.91
K=16	0.89	0.9	0.83	0.84
K=16	0.93	0.82	0.88	0.82
K=16	0.94	0.87	0.86	0.88
K=16	0.95	0.82	0.84	0.86
K=16	0.86	0.91	0.84	0.89
K=16	0.94	0.89	0.86	0.8
K=16	0.95	0.8	0.8	0.85
K=16	0.93	0.87	0.84	0.86
K=16	0.92	0.85	0.9	0.81
K=16	0.92	0.89	0.81	0.8
K=16	0.95	0.86	0.88	0.79
K=16	0.91	0.89	0.83	0.87
K=16	0.94	0.81	0.83	0.81
K=16	0.96	0.85	0.83	0.85
K=16	0.94	0.82	0.84	0.85
K=16	0.96	0.89	0.91	0.89
K=16	0.88	0.89	0.85	0.85
K=16	0.89	0.81	0.86	0.78
K=16	0.89	0.83	0.85	0.84
K=16	0.94	0.92	0.91	0.79
K=16	0.92	0.86	0.86	0.84
K=16	0.96	0.87	0.88	0.85
K=16	0.91	0.86	0.76	0.82
K=16	0.95	0.84	0.79	0.82
K=16	0.93	0.82	0.88	0.79
K=16	0.86	0.9	0.83	0.83
K=16	0.89	0.9	0.88	0.79
K=16	0.94	0.88	0.86	0.84
K=16	0.91	0.85	0.86	0.92
K=16	0.95	0.85	0.88	0.8
K=16	0.94	0.83	0.87	0.88
K=16	0.93	0.87	0.77	0.84
K=16	0.91	0.87	0.85	0.84
K=16	0.94	0.87	0.86	0.85
K=16	0.93	0.87	0.79	0.82
K=16	0.89	0.81	0.85	0.84
K=16	0.89	0.84	0.9	0.81
K=16	0.86	0.87	0.87	0.82
K=16	0.95	0.88	0.86	0.81
K=16	0.94	0.75	0.88	0.88
K=16	0.94	0.83	0.88	0.87
K=16	0.93	0.84	0.85	0.88
K=16	0.88	0.84	0.84	0.93
K=16	0.89	0.85	0.84	0.85
K=16	0.92	0.86	0.89	0.79
K=16	0.93	0.79	0.82	0.84
K=16	0.87	0.81	0.79	0.84
K=16	0.94	0.9	0.82	0.86
K=16	0.95	0.92	0.8	0.8
K=16	0.94	0.86	0.86	0.93
K=16	0.92	0.89	0.9	0.8
K=16	0.92	0.93	0.87	0.86
K=16	0.98	0.9	0.85	0.86
K=16	0.9	0.88	0.92	0.88
K=16	0.91	0.86	0.82	0.89
K=16	0.91	0.84	0.87	0.82
K=16	0.9	0.85	0.8	0.86
K=16	0.92	0.88	0.87	0.84
K=16	0.82	0.85	0.87	0.81
K=16	0.86	0.88	0.81	0.84
K=16	0.93	0.83	0.88	0.83
K=16	0.96	0.9	0.89	0.8
K=16	0.89	0.85	0.85	0.83
K=16	0.93	0.85	0.86	0.88
K=16	0.92	0.87	0.81	0.82
K=16	0.91	0.95	0.85	0.88
K=16	0.93	0.85	0.79	0.84
K=16	0.95	0.81	0.88	0.86
K=16	0.92	0.86	0.84	0.77
K=16	0.94	0.81	0.86	0.89
K=16	0.95	0.9	0.85	0.78
K=16	0.95	0.87	0.89	0.83
K=16	0.93	0.92	0.84	0.85
K=16	0.82	0.79	0.86	0.8
K=16	0.93	0.88	0.8	0.82
K=16	0.89	0.86	0.85	0.82
K=16	0.94	0.9	0.85	0.78
K=16	0.92	0.87	0.87	0.86
K=16	0.93	0.9	0.84	0.84
K=16	0.94	0.83	0.82	0.81
K=16	0.89	0.85	0.83	0.8
K=16	0.92	0.85	0.82	0.91
K=16	0.92	0.91	0.84	0.84
K=16	0.87	0.86	0.89	0.86
K=16	0.93	0.83	0.84	0.82
K=16	0.89	0.83	0.87	0.81
K=16	0.91	0.86	0.84	0.87
K=16	0.91	0.86	0.87	0.8
K=16	0.92	0.85	0.82	0.9
K=16	0.91	0.82	0.9	0.85
K=16	0.91	0.88	0.89	0.88
K=16	0.95	0.88	0.79	0.87
K=16	0.93	0.87	0.84	0.84
K=16	0.88	0.81	0.86	0.87
K=16	0.92	0.82	0.93	0.84
K=16	0.89	0.89	0.86	0.83
K=16	0.89	0.88	0.8	0.78
K=16	0.89	0.88	0.91	0.81
K=16	0.88	0.84	0.8	0.88
K=16	0.9	0.87	0.86	0.84
K=16	0.93	0.9	0.88	0.78
K=16	0.9	0.83	0.88	0.82
K=16	0.91	0.87	0.83	0.86
K=16	0.95	0.84	0.84	0.86
K=16	0.91	0.87	0.87	0.8
K=16	0.95	0.85	0.89	0.77
K=16	0.93	0.91	0.85	0.85
K=16	0.94	0.9	0.85	0.85
K=16	0.92	0.86	0.83	0.82
K=16	0.95	0.87	0.91	0.86
K=16	0.91	0.88	0.85	0.88
K=16	0.96	0.87	0.84	0.81
K=16	0.92	0.8	0.85	0.88
K=16	0.94	0.85	0.87	0.86
K=16	0.92	0.86	0.8	0.91
K=16	0.91	0.83	0.85	0.87
K=16	0.95	0.82	0.83	0.88
K=16	0.92	0.87	0.9	0.86
K=16	0.95	0.9	0.83	0.79
K=16	0.89	0.79	0.8	0.8
K=16	0.96	0.86	0.9	0.86
K=16	0.87	0.89	0.83	0.85
K=16	0.9	0.93	0.89	0.87
K=16	0.91	0.9	0.78	0.86
K=16	0.95	0.79	0.88	0.85
K=16	0.91	0.86	0.8	0.79
K=16	0.96	0.8	0.79	0.8
K=16	0.9	0.87	0.87	0.9
K=16	0.91	0.88	0.9	0.82
K=16	0.93	0.89	0.86	0.84
K=16	0.91	0.92	0.83	0.86
K=16	0.91	0.87	0.78	0.89
K=16	0.97	0.83	0.83	0.85
K=16	0.92	0.83	0.91	0.86
K=16	0.91	0.85	0.85	0.85
K=16	0.9	0.93	0.84	0.85
K=16	0.97	0.84	0.81	0.9
K=16	0.88	0.83	0.86	0.83
K=16	0.88	0.9	0.8	0.88
K=16	0.92	0.81	0.83	0.81
K=16	0.96	0.87	0.8	0.79
K=16	0.89	0.86	0.91	0.81
K=16	0.92	0.86	0.86	0.85
K=16	0.86	0.88	0.87	0.82
K=16	0.88	0.84	0.91	0.77
K=16	0.92	0.85	0.84	0.81
K=16	0.94	0.87	0.82	0.85
K=16	0.9	0.88	0.85	0.83
K=16	0.93	0.83	0.86	0.85
K=16	0.91	0.9	0.84	0.8
K=16	0.95	0.88	0.82	0.88
K=16	0.93	0.92	0.86	0.84
K=16	0.9	0.84	0.81	0.84
K=16	0.92	0.88	0.87	0.91
K=16	0.9	0.89	0.84	0.79
K=16	0.9	0.89	0.83	0.84
K=16	0.9	0.87	0.82	0.9
K=16	0.93	0.85	0.83	0.79
K=16	0.96	0.87	0.89	0.85
K=16	0.88	0.89	0.83	0.91
K=16	0.95	0.89	0.81	0.81
K=16	0.92	0.82	0.82	0.83
K=16	0.93	0.85	0.87	0.79
K=16	0.94	0.77	0.78	0.82
K=16	0.89	0.88	0.9	0.86
K=16	0.91	0.91	0.86	0.81
K=16	0.89	0.79	0.84	0.79
K=16	0.93	0.86	0.89	0.92
K=16	0.97	0.87	0.82	0.92
K=16	0.92	0.83	0.83	0.84
K=16	0.93	0.84	0.78	0.83
K=16	0.96	0.79	0.81	0.81
K=16	0.91	0.87	0.86	0.81
K=16	0.93	0.84	0.83	0.87
K=16	0.89	0.9	0.83	0.79
K=16	0.9	0.84	0.82	0.82
K=16	0.93	0.87	0.88	0.83
K=16	0.91	0.87	0.81	0.82
K=16	0.92	0.86	0.8	0.82
K=16	0.92	0.78	0.86	0.87
K=16	0.93	0.86	0.85	0.83
K=16	0.94	0.79	0.81	0.81
K=16	0.92	0.87	0.84	0.87
K=16	0.93	0.82	0.84	0.8
K=16	0.97	0.86	0.87	0.86
K=16	0.94	0.92	0.83	0.8
K=16	0.94	0.85	0.87	0.82
K=16	0.94	0.88	0.88	0.8
K=16	0.94	0.84	0.83	0.83
K=16	0.96	0.85	0.88	0.82
K=16	0.96	0.87	0.86	0.87
K=16	0.97	0.86	0.83	0.77
K=16	0.94	0.84	0.82	0.87
K=16	0.96	0.88	0.85	0.88
K=16	0.88	0.88	0.82	0.85
K=16	0.91	0.92	0.9	0.85
K=16	0.92	0.86	0.84	0.79
K=16	0.93	0.92	0.85	0.9
K=16	0.86	0.83	0.89	0.82
K=16	0.91	0.85	0.87	0.9
K=16	0.93	0.86	0.87	0.82
K=16	0.89	0.91	0.9	0.83
K=16	0.91	0.88	0.79	0.92
K=16	0.9	0.88	0.87	0.87
K=16	0.92	0.87	0.89	0.9
K=16	0.94	0.9	0.87	0.83
K=16	0.94	0.9	0.8	0.77
K=16	0.92	0.89	0.87	0.85
K=16	0.93	0.83	0.86	0.9
K=16	0.87	0.86	0.9	0.83
K=16	0.95	0.91	0.86	0.85
K=16	0.88	0.88	0.79	0.81
K=16	0.94	0.85	0.82	0.81
K=16	0.96	0.85	0.81	0.8
K=16	0.9	0.82	0.92	0.83
K=16	0.93	0.88	0.87	0.8
K=16	0.89	0.82	0.8	0.81
K=16	0.93	0.91	0.81	0.85
K=16	0.93	0.81	0.86	0.88
K=16	0.93	0.89	0.84	0.84
K=16	0.9	0.87	0.89	0.88
K=16	0.95	0.86	0.89	0.81
K=16	0.93	0.78	0.86	0.8
K=16	0.86	0.89	0.88	0.82
K=16	0.92	0.84	0.93	0.79
K=16	0.93	0.87	0.87	0.87
K=16	0.94	0.88	0.89	0.86
K=16	0.9	0.86	0.85	0.86
K=16	0.95	0.85	0.77	0.86
K=16	0.92	0.8	0.85	0.89
K=16	0.92	0.86	0.86	0.82
K=16	0.86	0.9	0.84	0.88
K=16	0.92	0.82	0.88	0.9
K=16	0.91	0.92	0.83	0.91
K=16	0.91	0.86	0.83	0.87
K=16	0.91	0.83	0.84	0.88
K=16	0.89	0.88	0.87	0.86
K=16	0.93	0.9	0.85	0.88
K=16	0.91	0.87	0.81	0.84
K=16	0.93	0.86	0.83	0.84
K=16	0.94	0.93	0.82	0.83
K=16	0.89	0.91	0.82	0.85
K=16	0.93	0.85	0.89	0.84
K=16	0.92	0.88	0.84	0.88
K=16	0.95	0.9	0.78	0.86
K=16	0.94	0.87	0.84	0.84
K=16	0.92	0.83	0.85	0.85
K=16	0.94	0.79	0.81	0.87
K=16	0.93	0.85	0.87	0.81
K=16	0.95	0.83	0.81	0.9
K=16	0.92	0.89	0.9	0.79
K=16	0.91	0.79	0.84	0.85
K=16	0.91	0.87	0.79	0.93
K=16	0.94	0.87	0.85	0.89
K=16	0.91	0.84	0.81	0.77
K=16	0.94	0.88	0.85	0.81
K=16	0.92	0.85	0.89	0.83
K=16	0.9	0.89	0.87	0.83
K=16	0.94	0.85	0.85	0.76
K=16	0.89	0.85	0.84	0.77
K=16	0.89	0.91	0.85	0.84
K=16	0.91	0.85	0.83	0.79
K=16	0.9	0.83	0.83	0.87
K=16	0.91	0.9	0.81	0.75
K=16	0.93	0.86	0.84	0.84
K=16	0.93	0.88	0.78	0.84
K=16	0.96	0.88	0.84	0.85
K=16	0.92	0.85	0.86	0.85
K=16	0.94	0.85	0.79	0.87
K=16	0.95	0.82	0.91	0.84
K=16	0.87	0.8	0.87	0.79
K=16	0.92	0.78	0.88	0.79
K=16	0.89	0.88	0.8	0.86
K=16	0.9	0.87	0.84	0.78
K=16	0.94	0.85	0.86	0.83
K=16	0.94	0.87	0.85	0.78
K=16	0.97	0.81	0.87	0.87
K=16	0.93	0.84	0.86	0.85
K=16	0.92	0.83	0.88	0.86
K=16	0.96	0.91	0.81	0.84
K=16	0.96	0.91	0.82	0.82
K=16	0.93	0.91	0.89	0.87
K=16	0.95	0.86	0.86	0.84
K=16	0.92	0.87	0.85	0.85
K=16	0.93	0.85	0.83	0.86
K=16	0.91	0.81	0.79	0.8
K=16	0.92	0.92	0.81	0.81
K=16	0.92	0.83	0.88	0.88
K=16	0.92	0.86	0.83	0.81
K=16	0.95	0.88	0.85	0.85
K=16	0.92	0.82	0.86	0.82
K=16	0.93	0.83	0.86	0.8
K=16	0.96	0.92	0.9	0.78
K=16	0.94	0.88	0.82	0.8
K=16	0.89	0.87	0.87	0.82
K=16	0.92	0.87	0.84	0.83
K=16	0.93	0.86	0.82	0.79
K=16	0.91	0.84	0.86	0.8
K=16	0.92	0.82	0.85	0.91
K=16	0.94	0.9	0.85	0.83
K=16	0.87	0.84	0.83	0.9
K=16	0.93	0.8	0.84	0.86
K=16	0.91	0.87	0.89	0.78
K=16	0.96	0.86	0.84	0.83
K=16	0.96	0.86	0.88	0.86
K=16	0.92	0.85	0.8	0.86
K=16	0.92	0.81	0.84	0.83
K=16	0.97	0.88	0.87	0.83
K=16	0.91	0.89	0.79	0.8
K=16	0.96	0.84	0.86	0.87
K=16	0.89	0.85	0.8	0.89
K=16	0.98	0.84	0.85	0.78
K=16	0.95	0.95	0.85	0.82
K=16	0.96	0.87	0.83	0.87
K=16	0.92	0.8	0.85	0.83
K=16	0.93	0.8	0.9	0.8
K=16	0.91	0.87	0.9	0.83
K=16	0.92	0.86	0.84	0.85
K=16	0.94	0.89	0.79	0.89
K=16	0.96	0.88	0.88	0.88
K=16	0.95	0.89	0.8	0.92
K=16	0.88	0.81	0.89	0.87
K=16	0.91	0.85	0.83	0.93
K=16	0.89	0.79	0.87	0.87
K=16	0.9	0.85	0.85	0.88
K=16	0.94	0.83	0.83	0.86
K=16	0.9	0.86	0.83	0.81
K=16	0.89	0.86	0.87	0.83
K=16	0.93	0.82	0.88	0.86
K=16	0.96	0.9	0.86	0.85
K=16	0.93	0.85	0.86	0.85
K=16	0.93	0.87	0.89	0.85
K=16	0.9	0.89	0.87	0.81
K=16	0.97	0.89	0.93	0.89
K=16	0.96	0.86	0.83	0.8
K=16	0.96	0.86	0.82	0.88
K=16	0.92	0.83	0.84	0.87
K=16	0.96	0.84	0.86	0.9
K=16	0.91	0.9	0.86	0.86
K=16	0.9	0.88	0.89	0.81
K=16	0.88	0.82	0.75	0.84
K=16	0.93	0.83	0.84	0.89
K=16	0.87	0.87	0.88	0.81
K=16	0.94	0.85	0.84	0.8
K=16	0.93	0.81	0.77	0.88
K=16	0.88	0.87	0.89	0.82
K=16	0.93	0.82	0.85	0.84
K=16	0.94	0.81	0.91	0.89
K=16	0.96	0.82	0.85	0.82
K=16	0.91	0.92	0.87	0.91
K=16	0.94	0.79	0.85	0.78
K=16	0.93	0.88	0.87	0.88
K=16	0.85	0.81	0.8	0.85
K=16	0.91	0.83	0.85	0.79
K=16	0.92	0.84	0.88	0.84
K=16	0.91	0.85	0.9	0.8
K=16	0.93	0.9	0.85	0.87
K=16	0.88	0.78	0.86	0.89
K=16	0.92	0.89	0.83	0.88
K=16	0.94	0.87	0.82	0.8
K=16	0.95	0.85	0.77	0.82
K=16	0.91	0.86	0.86	0.9
K=16	0.92	0.86	0.85	0.9
K=16	0.95	0.85	0.79	0.86
K=16	0.91	0.82	0.87	0.78
K=16	0.88	0.87	0.85	0.88
K=16	0.94	0.84	0.82	0.87
K=16	0.85	0.87	0.87	0.89
K=16	0.86	0.87	0.87	0.83
K=16	0.88	0.86	0.86	0.85
K=16	0.95	0.89	0.75	0.82
K=16	0.95	0.85	0.74	0.78
K=16	0.91	0.86	0.81	0.91
K=16	0.93	0.85	0.85	0.86
K=16	0.94	0.86	0.83	0.83
K=16	0.91	0.78	0.86	0.83
K=16	0.91	0.83	0.78	0.89
K=16	0.97	0.83	0.82	0.84
K=16	0.95	0.87	0.88	0.91
K=16	0.94	0.86	0.8	0.82
K=16	0.93	0.89	0.82	0.83
K=16	0.95	0.86	0.81	0.82
K=16	0.88	0.83	0.89	0.81
K=16	0.86	0.83	0.85	0.87
K=16	0.93	0.89	0.85	0.83
K=16	0.95	0.83	0.89	0.82
K=16	0.92	0.9	0.86	0.88
K=16	0.91	0.86	0.9	0.79
K=16	0.9	0.88	0.8	0.83
K=16	0.93	0.88	0.91	0.9
K=16	0.93	0.81	0.9	0.87
K=16	0.89	0.84	0.81	0.82
K=16	0.93	0.85	0.82	0.87
K=16	0.85	0.84	0.91	0.9
K=16	0.92	0.87	0.81	0.89
K=16	0.93	0.84	0.82	0.85
K=16	0.91	0.91	0.86	0.8
K=16	0.91	0.89	0.81	0.85
K=16	0.95	0.89	0.82	0.82
K=16	0.96	0.86	0.93	0.91
K=16	0.98	0.83	0.84	0.87
K=16	0.93	0.93	0.88	0.81
K=16	0.91	0.89	0.82	0.84
K=16	0.9	0.87	0.87	0.89
K=16	0.93	0.86	0.85	0.84
K=16	0.91	0.93	0.81	0.78
K=16	0.9	0.87	0.87	0.85
K=16	0.95	0.86	0.88	0.89
K=16	0.94	0.86	0.85	0.86
K=16	0.92	0.87	0.85	0.81
K=16	0.96	0.91	0.75	0.83
K=16	0.91	0.88	0.92	0.76
K=16	0.88	0.84	0.81	0.81
K=16	0.9	0.83	0.88	0.84
K=16	0.89	0.89	0.82	0.8
K=16	0.92	0.83	0.88	0.85
K=16	0.89	0.84	0.79	0.83
K=16	0.96	0.81	0.88	0.81
K=16	0.92	0.86	0.85	0.84
K=16	0.92	0.83	0.9	0.82
K=16	0.96	0.89	0.89	0.86
K=16	0.92	0.79	0.83	0.84
K=16	0.9	0.86	0.92	0.84
K=16	0.92	0.83	0.86	0.81
K=16	0.95	0.84	0.9	0.83
K=16	0.93	0.87	0.87	0.82
K=16	0.91	0.86	0.84	0.8
K=16	0.96	0.81	0.83	0.86
K=16	0.93	0.85	0.81	0.83
K=16	0.9	0.9	0.83	0.85
K=16	0.93	0.84	0.87	0.83
K=16	0.96	0.86	0.78	0.8
K=16	0.88	0.8	0.84	0.8
K=16	0.96	0.88	0.89	0.86
K=16	0.91	0.85	0.91	0.84
K=16	0.9	0.89	0.83	0.82
K=16	0.97	0.88	0.89	0.87
K=16	0.89	0.8	0.89	0.87
K=16	0.9	0.74	0.86	0.8
K=16	0.91	0.92	0.87	0.84
K=16	0.88	0.87	0.82	0.75
K=16	0.88	0.89	0.88	0.86
K=16	0.89	0.91	0.87	0.89
K=16	0.95	0.85	0.82	0.84
K=16	0.92	0.86	0.85	0.79
K=16	0.94	0.86	0.8	0.79
K=16	0.88	0.8	0.75	0.85
K=16	0.93	0.78	0.82	0.89
K=16	0.89	0.88	0.8	0.83
K=16	0.9	0.85	0.86	0.84
K=16	0.92	0.86	0.84	0.86
K=16	0.9	0.88	0.88	0.85
K=16	0.95	0.85	0.9	0.81
K=16	0.88	0.83	0.85	0.82
K=16	0.87	0.83	0.86	0.86
K=16	0.93	0.81	0.85	0.82
K=16	0.94	0.89	0.81	0.76
K=16	0.97	0.87	0.85	0.83
K=16	0.89	0.88	0.88	0.76
K=16	0.94	0.88	0.87	0.79
K=16	0.92	0.82	0.91	0.88
K=16	0.9	0.83	0.82	0.82
K=16	0.92	0.81	0.83	0.81
K=16	0.9	0.86	0.87	0.85
K=16	0.91	0.9	0.88	0.85
K=16	0.94	0.85	0.83	0.83
K=16	0.9	0.82	0.79	0.88
K=16	0.91	0.9	0.79	0.85
K=16	0.92	0.83	0.82	0.81
K=16	0.94	0.89	0.86	0.81
K=16	0.88	0.86	0.81	0.86
K=16	0.88	0.88	0.87	0.9
K=16	0.95	0.89	0.81	0.81
K=16	0.9	0.86	0.85	0.8
K=16	0.92	0.89	0.84	0.88
K=16	0.94	0.83	0.87	0.86
K=16	0.93	0.89	0.89	0.88
K=16	0.92	0.75	0.91	0.81
K=16	0.9	0.88	0.9	0.8
K=16	0.93	0.85	0.9	0.78
K=16	0.87	0.88	0.84	0.86
K=16	0.89	0.84	0.76	0.87
K=16	0.88	0.88	0.84	0.85
K=16	0.91	0.87	0.84	0.87
K=16	0.89	0.81	0.79	0.88
K=16	0.96	0.88	0.83	0.79
K=16	0.93	0.83	0.93	0.88
K=16	0.94	0.93	0.83	0.8
K=16	0.85	0.88	0.84	0.88
K=16	0.88	0.92	0.81	0.76
K=16	0.94	0.88	0.86	0.85
K=16	0.96	0.84	0.89	0.83
K=16	0.91	0.85	0.92	0.83
K=16	0.94	0.84	0.9	0.79
K=16	0.96	0.86	0.87	0.82
K=16	0.91	0.9	0.89	0.84
K=16	0.9	0.86	0.81	0.73
K=16	0.89	0.84	0.8	0.84
K=16	0.87	0.87	0.86	0.82
K=16	0.93	0.87	0.88	0.88
K=16	0.87	0.87	0.85	0.85
K=16	0.92	0.86	0.85	0.79
K=16	0.89	0.86	0.77	0.79
K=16	0.92	0.89	0.87	0.86
K=16	0.93	0.86	0.81	0.86
K=16	0.93	0.84	0.9	0.83
K=16	0.89	0.9	0.84	0.84
K=16	0.95	0.86	0.8	0.88
K=16	0.95	0.87	0.86	0.78
K=16	0.92	0.85	0.84	0.82
K=16	0.93	0.85	0.79	0.82
K=16	0.9	0.8	0.91	0.84
K=16	0.87	0.93	0.83	0.79
K=16	0.95	0.82	0.84	0.81
K=16	0.94	0.94	0.9	0.86
K=16	0.93	0.86	0.89	0.85
K=16	0.95	0.83	0.87	0.85
K=16	0.9	0.85	0.83	0.86
K=16	0.96	0.8	0.81	0.83
K=16	0.93	0.81	0.81	0.85
K=16	0.95	0.9	0.88	0.85
K=16	0.9	0.8	0.83	0.81
K=16	0.88	0.86	0.8	0.87
K=16	0.89	0.83	0.84	0.8
K=16	0.92	0.88	0.84	0.91
K=16	0.94	0.87	0.94	0.84
K=16	0.87	0.87	0.9	0.89
K=16	0.88	0.83	0.9	0.89
K=16	0.87	0.94	0.78	0.89
K=16	0.94	0.89	0.87	0.84
K=16	0.92	0.86	0.87	0.85
K=16	0.92	0.85	0.87	0.87
K=16	0.95	0.86	0.82	0.81
K=16	0.94	0.87	0.92	0.84
K=16	0.95	0.88	0.85	0.84
K=16	0.94	0.85	0.87	0.82
K=16	0.85	0.84	0.84	0.85
K=16	0.89	0.82	0.82	0.84
K=16	0.95	0.91	0.84	0.79
K=16	0.9	0.84	0.91	0.81
K=16	0.88	0.88	0.84	0.87
K=16	0.93	0.85	0.88	0.84
K=16	0.94	0.86	0.83	0.86
K=16	0.94	0.84	0.88	0.87
K=16	0.91	0.86	0.89	0.88
K=16	0.84	0.88	0.89	0.81
K=16	0.91	0.88	0.84	0.87
K=16	0.92	0.88	0.77	0.83
K=16	0.91	0.86	0.84	0.83
K=16	0.9	0.84	0.78	0.84
K=16	0.88	0.86	0.79	0.8
K=16	0.92	0.81	0.93	0.88
K=16	0.92	0.76	0.87	0.86
K=16	0.93	0.8	0.8	0.84
K=16	0.89	0.83	0.9	0.88
K=16	0.94	0.9	0.81	0.86
K=16	0.89	0.87	0.86	0.85
K=16	0.91	0.91	0.91	0.91
K=16	0.91	0.88	0.83	0.89
K=16	0.91	0.87	0.84	0.85
K=16	0.94	0.91	0.81	0.79
K=16	0.92	0.79	0.84	0.86
K=16	0.93	0.86	0.81	0.84
K=16	0.96	0.87	0.85	0.75
K=16	0.91	0.81	0.87	0.9
K=16	0.89	0.9	0.83	0.86
K=16	0.94	0.83	0.85	0.85
K=16	0.93	0.87	0.88	0.83
K=16	0.93	0.86	0.85	0.8
K=16	0.93	0.86	0.87	0.88
K=16	0.84	0.88	0.81	0.81
K=16	0.91	0.85	0.84	0.77
K=16	0.85	0.87	0.89	0.83
K=16	0.92	0.87	0.77	0.87
K=16	0.93	0.86	0.8	0.82
K=16	0.92	0.93	0.9	0.77
K=16	0.96	0.81	0.85	0.88
K=16	0.91	0.91	0.83	0.8
K=16	0.9	0.84	0.86	0.88
K=16	0.92	0.92	0.81	0.84
K=16	0.87	0.86	0.8	0.85
K=16	0.94	0.9	0.84	0.91
K=16	0.94	0.88	0.92	0.82
K=16	0.93	0.8	0.89	0.75
K=16	0.9	0.89	0.86	0.84
K=16	0.89	0.84	0.85	0.9
K=16	0.92	0.85	0.87	0.82
K=16	0.92	0.85	0.91	0.87
K=16	0.92	0.84	0.85	0.85
K=16	0.92	0.82	0.82	0.87
K=16	0.89	0.93	0.85	0.85
K=16	0.89	0.86	0.8	0.81
K=16	0.96	0.85	0.88	0.84
K=16	0.95	0.79	0.86	0.86
K=16	0.95	0.85	0.87	0.88
K=16	0.91	0.83	0.77	0.87
K=16	0.93	0.89	0.79	0.83
K=16	0.86	0.83	0.84	0.83
K=16	0.91	0.84	0.82	0.88
K=16	0.95	0.87	0.89	0.83
K=16	0.94	0.85	0.82	0.83
K=16	0.93	0.81	0.82	0.82
K=16	0.86	0.86	0.87	0.86
K=16	0.96	0.87	0.87	0.84
K=16	0.92	0.81	0.81	0.84
K=16	0.87	0.88	0.79	0.87
K=16	0.94	0.83	0.81	0.82
K=16	0.95	0.84	0.84	0.83
K=16	0.96	0.86	0.89	0.81
K=16	0.88	0.85	0.86	0.84
K=16	0.9	0.89	0.84	0.88
K=16	0.91	0.79	0.84	0.86
K=16	0.94	0.85	0.86	0.85
K=16	0.93	0.87	0.9	0.84
K=16	0.92	0.85	0.81	0.89
K=16	0.93	0.88	0.82	0.82
K=16	0.9	0.84	0.85	0.91
K=16	0.86	0.92	0.86	0.8
K=16	0.9	0.84	0.84	0.88
K=16	0.95	0.84	0.83	0.84
K=16	0.93	0.8	0.81	0.82
K=16	0.98	0.86	0.89	0.84
K=16	0.95	0.86	0.84	0.9
K=16	0.92	0.89	0.84	0.91
K=16	0.9	0.84	0.81	0.87
K=16	0.96	0.95	0.85	0.81
K=16	0.9	0.84	0.89	0.86
K=16	0.97	0.87	0.88	0.88
K=16	0.9	0.86	0.84	0.94
K=16	0.91	0.87	0.83	0.8
K=16	0.93	0.88	0.88	0.84
K=16	0.95	0.88	0.9	0.84
K=16	0.91	0.86	0.82	0.77
K=16	0.94	0.87	0.91	0.82
K=16	0.91	0.87	0.91	0.86
K=16	0.91	0.9	0.78	0.86
K=16	0.91	0.89	0.87	0.77
K=16	0.93	0.83	0.81	0.89
K=16	0.94	0.89	0.82	0.88
K=16	0.89	0.83	0.83	0.84
K=16	0.91	0.86	0.83	0.87
K=16	0.9	0.79	0.91	0.84
K=16	0.9	0.82	0.88	0.84
K=16	0.95	0.9	0.84	0.79
K=16	0.94	0.82	0.9	0.85
K=16	0.93	0.8	0.82	0.84
K=16	0.87	0.84	0.85	0.84
K=16	0.89	0.87	0.81	0.84
K=16	0.93	0.87	0.85	0.87
K=16	0.88	0.83	0.89	0.79
K=16	0.91	0.88	0.85	0.87
K=16	0.95	0.8	0.86	0.82
K=16	0.94	0.9	0.89	0.8
K=16	0.97	0.84	0.85	0.83
K=16	0.9	0.88	0.83	0.81
K=16	0.91	0.83	0.82	0.83
K=16	0.92	0.87	0.84	0.84
K=16	0.87	0.87	0.84	0.87
K=16	0.91	0.82	0.85	0.85
K=16	0.91	0.84	0.88	0.81
K=16	0.86	0.89	0.81	0.85
K=16	0.91	0.85	0.82	0.86
K=16	0.92	0.87	0.84	0.81
K=16	0.89	0.84	0.88	0.81
K=16	0.93	0.83	0.83	0.88
K=16	0.91	0.84	0.89	0.9
K=16	0.92	0.88	0.88	0.83
K=16	0.93	0.86	0.8	0.77
K=16	0.93	0.88	0.82	0.84
K=16	0.92	0.92	0.83	0.79
K=16	0.89	0.92	0.83	0.84
K=16	0.92	0.91	0.84	0.89
K=16	0.89	0.86	0.87	0.89
K=16	0.93	0.89	0.89	0.8
K=16	0.95	0.89	0.85	0.81
K=16	0.94	0.8	0.85	0.9
K=16	0.94	0.87	0.87	0.86
K=16	0.89	0.85	0.86	0.91
K=16	0.93	0.87	0.84	0.8
K=16	0.93	0.84	0.87	0.83
K=16	0.94	0.89	0.87	0.84
K=16	0.97	0.84	0.89	0.86
K=16	0.9	0.87	0.77	0.83
K=16	0.88	0.83	0.82	0.83
K=16	0.89	0.8	0.92	0.81
K=16	0.92	0.87	0.85	0.78
K=16	0.94	0.87	0.78	0.83
K=16	0.9	0.84	0.85	0.84
K=16	0.9	0.87	0.84	0.81
K=16	0.92	0.87	0.9	0.76
K=16	0.94	0.82	0.8	0.83
K=16	0.95	0.84	0.88	0.85
K=16	0.91	0.81	0.89	0.89
K=16	0.95	0.89	0.83	0.9
K=16	0.92	0.88	0.86	0.81
K=16	0.89	0.83	0.87	0.87
K=16	0.93	0.89	0.84	0.82
K=16	0.9	0.84	0.83	0.84
K=16	0.93	0.91	0.9	0.82
K=16	0.89	0.86	0.8	0.79
K=16	0.96	0.91	0.87	0.84
K=16	0.92	0.88	0.83	0.81
K=16	0.9	0.91	0.91	0.8
K=16	0.85	0.8	0.87	0.87
K=16	0.94	0.84	0.81	0.8
K=16	0.93	0.81	0.87	0.78
K=16	0.92	0.79	0.77	0.85
K=16	0.82	0.88	0.86	0.88
K=16	0.91	0.9	0.78	0.85
K=16	0.9	0.88	0.8	0.9
K=16	0.92	0.84	0.88	0.77
K=16	0.89	0.85	0.85	0.9
K=16	0.84	0.87	0.82	0.9
K=16	0.88	0.87	0.84	0.82
K=16	0.93	0.87	0.86	0.81
K=16	0.96	0.86	0.83	0.89
K=16	0.95	0.84	0.82	0.82
K=16	0.95	0.82	0.85	0.81
K=16	0.89	0.88	0.83	0.85
K=16	0.88	0.86	0.83	0.84
K=16	0.91	0.81	0.82	0.78
K=16	0.86	0.88	0.9	0.81
K=16	0.93	0.88	0.82	0.85
K=16	0.9	0.88	0.93	0.88
K=16	0.91	0.88	0.8	0.83
K=16	0.91	0.88	0.86	0.86
K=16	0.92	0.83	0.9	0.84
K=16	0.93	0.89	0.89	0.83
K=16	0.93	0.89	0.85	0.83
K=16	0.89	0.83	0.77	0.86
K=16	0.95	0.87	0.9	0.82
K=16	0.94	0.85	0.87	0.82
K=16	0.93	0.87	0.86	0.75
K=16	0.93	0.87	0.79	0.82
K=16	0.92	0.8	0.81	0.9
K=16	0.95	0.89	0.79	0.89
K=16	0.94	0.82	0.83	0.79
K=16	0.92	0.88	0.88	0.9
K=16	0.94	0.84	0.94	0.8
K=16	0.95	0.85	0.85	0.89
K=16	0.93	0.89	0.89	0.88
K=16	0.91	0.97	0.8	0.92
K=16	0.9	0.85	0.82	0.86
K=16	0.91	0.9	0.82	0.92
K=16	0.94	0.87	0.83	0.89
K=16	0.93	0.79	0.82	0.84
K=16	0.91	0.91	0.87	0.83
K=16	0.89	0.85	0.88	0.84
K=16	0.94	0.89	0.87	0.87
K=16	0.91	0.85	0.84	0.91
K=16	0.89	0.87	0.89	0.81
K=16	0.94	0.91	0.78	0.87
K=16	0.96	0.85	0.86	0.86
K=16	0.87	0.87	0.87	0.85
K=16	0.9	0.82	0.86	0.82
K=16	0.89	0.89	0.91	0.8
K=16	0.93	0.82	0.81	0.89
K=16	0.92	0.86	0.83	0.88
K=16	0.94	0.83	0.87	0.87
K=16	0.91	0.83	0.9	0.83
K=16	0.89	0.81	0.91	0.82
K=16	0.89	0.83	0.8	0.85
K=16	0.88	0.87	0.86	0.9
K=16	0.95	0.84	0.83	0.79
K=16	0.93	0.85	0.83	0.84
K=16	0.95	0.78	0.88	0.83
K=16	0.91	0.88	0.79	0.84
K=16	0.94	0.92	0.79	0.81
K=16	0.9	0.8	0.86	0.86
K=16	0.94	0.82	0.84	0.86
K=16	0.95	0.85	0.82	0.85
K=16	0.91	0.86	0.84	0.79
K=16	0.92	0.86	0.88	0.82
K=16	0.9	0.88	0.89	0.88
K=16	0.96	0.87	0.9	0.86
K=16	0.98	0.93	0.84	0.82
K=16	0.93	0.87	0.89	0.79
K=16	0.91	0.84	0.84	0.87
K=16	0.88	0.89	0.82	0.86
K=16	0.86	0.87	0.9	0.79
K=16	0.94	0.91	0.88	0.86
K=16	0.87	0.89	0.86	0.81
K=16	0.93	0.84	0.89	0.79
K=16	0.94	0.9	0.88	0.88
K=16	0.96	0.84	0.85	0.72
K=16	0.93	0.85	0.88	0.9
K=16	0.92	0.8	0.84	0.82
K=16	0.94	0.85	0.8	0.83
K=16	0.92	0.84	0.81	0.83
K=16	0.92	0.87	0.82	0.91
K=16	0.94	0.88	0.86	0.87
K=16	0.93	0.84	0.81	0.85
K=16	0.91	0.89	0.83	0.77
K=16	0.9	0.85	0.9	0.85
K=16	0.92	0.85	0.87	0.86
K=16	0.96	0.87	0.79	0.83
K=16	0.95	0.89	0.85	0.8
K=16	0.94	0.83	0.79	0.83
K=16	0.9	0.84	0.87	0.87
K=16	0.93	0.89	0.86	0.83
K=16	0.92	0.88	0.9	0.76
K=16	0.88	0.83	0.92	0.82
K=16	0.93	0.89	0.8	0.86
K=16	0.92	0.85	0.88	0.86
K=16	0.93	0.9	0.85	0.78
K=16	0.91	0.88	0.87	0.87
K=16	0.96	0.86	0.88	0.9
K=16	0.88	0.89	0.87	0.85
K=16	0.91	0.91	0.84	0.8
K=16	0.93	0.84	0.88	0.84
K=16	0.94	0.81	0.83	0.88
K=16	0.93	0.87	0.84	0.92
K=16	0.92	0.82	0.9	0.84
K=16	0.94	0.86	0.78	0.84
K=16	0.93	0.88	0.86	0.79
K=16	0.94	0.81	0.86	0.82
K=16	0.9	0.91	0.85	0.84
K=16	0.95	0.93	0.86	0.85
K=16	0.94	0.82	0.82	0.82
K=16	0.89	0.82	0.85	0.79
K=16	0.9	0.8	0.83	0.89
K=16	0.97	0.86	0.83	0.82
K=16	0.91	0.88	0.87	0.91
K=16	0.92	0.87	0.81	0.85
K=16	0.92	0.83	0.88	0.82
K=16	0.91	0.85	0.76	0.88
K=16	0.93	0.89	0.86	0.85
K=16	0.88	0.81	0.85	0.89
K=16	0.9	0.86	0.81	0.83
K=16	0.92	0.85	0.88	0.78
K=16	0.93	0.83	0.9	0.87
K=16	0.93	0.86	0.8	0.88
K=16	0.93	0.93	0.8	0.84
K=16	0.9	0.85	0.88	0.83
K=16	0.94	0.82	0.89	0.77
K=16	0.91	0.87	0.82	0.82
K=16	0.89	0.78	0.89	0.81
K=16	0.94	0.87	0.87	0.87
K=16	0.92	0.87	0.88	0.84
K=16	0.93	0.85	0.89	0.82
K=16	0.87	0.82	0.87	0.88
K=16	0.93	0.89	0.92	0.85
K=16	0.91	0.89	0.86	0.74
K=16	0.97	0.86	0.83	0.88
K=16	0.94	0.78	0.86	0.85
K=16	0.97	0.88	0.86	0.83
K=16	0.92	0.86	0.83	0.85
K=16	0.93	0.87	0.8	0.89
K=16	0.94	0.85	0.91	0.9
K=16	0.9	0.81	0.86	0.79
K=16	0.93	0.9	0.87	0.87
K=16	0.9	0.88	0.86	0.84
K=16	0.92	0.87	0.9	0.86
K=16	0.92	0.91	0.85	0.77
K=16	0.95	0.9	0.77	0.84
K=16	0.93	0.84	0.86	0.78
K=16	0.86	0.85	0.85	0.89
K=16	0.93	0.87	0.79	0.77
K=16	0.95	0.88	0.88	0.89
K=16	0.94	0.82	0.84	0.78
K=16	0.93	0.81	0.76	0.78
K=16	0.97	0.92	0.83	0.84
K=16	0.92	0.87	0.86	0.8
K=16	0.89	0.76	0.88	0.9
K=16	0.9	0.92	0.86	0.82
K=16	0.92	0.86	0.83	0.85
K=16	0.88	0.85	0.81	0.81
K=16	0.91	0.84	0.79	0.88
K=16	0.84	0.87	0.86	0.82
K=16	0.93	0.88	0.87	0.85
K=16	0.92	0.83	0.84	0.85
K=16	0.91	0.92	0.83	0.84
K=16	0.93	0.87	0.9	0.91
K=16	0.93	0.9	0.8	0.88
K=16	0.92	0.9	0.87	0.87
K=16	0.89	0.83	0.87	0.78
K=16	0.9	0.86	0.8	0.86
K=16	0.94	0.81	0.85	0.86
K=16	0.88	0.94	0.81	0.82
K=16	0.85	0.84	0.85	0.77
K=16	0.95	0.87	0.87	0.86
K=16	0.87	0.86	0.88	0.88
K=16	0.91	0.83	0.82	0.8
K=16	0.91	0.89	0.82	0.84
K=16	0.93	0.86	0.85	0.8
K=16	0.92	0.83	0.87	0.88
K=16	0.94	0.88	0.9	0.78
K=16	0.9	0.88	0.92	0.8
K=16	0.94	0.86	0.83	0.83
K=16	0.91	0.84	0.8	0.83
K=16	0.91	0.81	0.8	0.83
K=16	0.9	0.95	0.82	0.87
K=16	0.95	0.88	0.83	0.79
K=16	0.94	0.83	0.87	0.8
K=16	0.92	0.86	0.87	0.85
K=16	0.95	0.85	0.88	0.81
K=16	0.92	0.87	0.91	0.83
K=16	0.91	0.86	0.87	0.8
K=16	0.94	0.89	0.83	0.8
K=16	0.89	0.8	0.86	0.81
K=16	0.94	0.85	0.89	0.78
K=16	0.87	0.86	0.87	0.87
K=16	0.94	0.87	0.82	0.78
K=16	0.95	0.8	0.88	0.86
K=16	0.91	0.82	0.84	0.85
K=16	0.91	0.88	0.8	0.83
K=16	0.89	0.89	0.84	0.81
K=16	0.95	0.86	0.83	0.89
K=16	0.93	0.9	0.84	0.84
K=16	0.86	0.87	0.88	0.81
K=16	0.9	0.86	0.88	0.84
K=16	0.89	0.86	0.83	0.81
K=16	0.95	0.85	0.83	0.83
K=16	0.98	0.88	0.87	0.89
K=16	0.94	0.91	0.87	0.84
K=16	0.93	0.92	0.88	0.75
K=16	0.93	0.85	0.8	0.79
K=16	0.97	0.87	0.86	0.89
K=16	0.92	0.9	0.86	0.88
K=16	0.91	0.81	0.83	0.86
K=16	0.94	0.85	0.83	0.91
K=16	0.92	0.91	0.83	0.75
K=16	0.91	0.85	0.78	0.85
K=16	0.93	0.92	0.81	0.84
K=16	0.92	0.87	0.88	0.84
K=16	0.94	0.9	0.9	0.79
K=16	0.95	0.83	0.85	0.86
K=16	0.91	0.9	0.82	0.85
K=16	0.95	0.85	0.9	0.86
K=16	0.93	0.86	0.88	0.86
K=16	0.91	0.85	0.87	0.75
K=16	0.85	0.86	0.91	0.89
K=16	0.93	0.9	0.9	0.83
K=16	0.91	0.86	0.86	0.78
K=16	0.94	0.81	0.87	0.85
K=16	0.95	0.91	0.86	0.88
K=16	0.94	0.9	0.78	0.79
K=16	0.91	0.93	0.78	0.87
K=16	0.9	0.87	0.88	0.76
K=16	0.96	0.85	0.86	0.85
K=16	0.95	0.85	0.82	0.83
K=16	0.95	0.92	0.88	0.85
K=16	0.91	0.88	0.82	0.91
K=16	0.89	0.78	0.8	0.87
K=16	0.98	0.83	0.89	0.8
K=16	0.85	0.86	0.83	0.86
K=16	0.92	0.84	0.82	0.87
K=16	0.9	0.89	0.86	0.81
K=16	0.91	0.86	0.87	0.83
K=16	0.92	0.85	0.9	0.79
K=16	0.92	0.85	0.82	0.86
K=16	0.87	0.83	0.87	0.82
K=16	0.88	0.85	0.91	0.78
K=16	0.9	0.87	0.88	0.82
K=16	0.95	0.87	0.83	0.84
K=16	0.92	0.91	0.84	0.81
K=16	0.91	0.84	0.84	0.87
K=16	0.95	0.84	0.85	0.88
K=16	0.88	0.9	0.88	0.89
K=16	0.93	0.84	0.89	0.86
K=16	0.9	0.85	0.82	0.89
K=16	0.9	0.83	0.91	0.82
K=16	0.94	0.8	0.8	0.88
K=16	0.96	0.82	0.78	0.86
K=16	0.9	0.83	0.91	0.76
K=16	0.93	0.87	0.91	0.83
K=16	0.97	0.9	0.87	0.78
K=16	0.95	0.86	0.86	0.86
K=16	0.99	0.8	0.78	0.86
K=16	0.9	0.83	0.88	0.81
K=16	0.93	0.84	0.89	0.86
K=16	0.94	0.85	0.87	0.85
K=16	0.94	0.9	0.84	0.86
K=16	0.96	0.9	0.89	0.83
K=16	0.92	0.91	0.84	0.78
K=16	0.92	0.85	0.91	0.88
K=16	0.89	0.87	0.9	0.87
K=16	0.93	0.87	0.87	0.8
K=16	0.98	0.8	0.84	0.86
K=16	0.95	0.86	0.92	0.82
K=16	0.89	0.83	0.81	0.8
K=16	0.9	0.85	0.86	0.85
K=16	0.91	0.85	0.79	0.81
K=16	0.91	0.82	0.82	0.86
K=16	0.94	0.8	0.82	0.85
K=16	0.93	0.91	0.87	0.74
K=16	0.93	0.88	0.87	0.79
K=16	0.91	0.87	0.86	0.85
K=16	0.91	0.81	0.82	0.8
K=16	0.95	0.88	0.84	0.8
K=16	0.92	0.88	0.9	0.85
K=16	0.92	0.84	0.87	0.86
K=16	0.91	0.92	0.92	0.85
K=16	0.92	0.86	0.82	0.79
K=16	0.88	0.85	0.81	0.81
K=16	0.92	0.89	0.81	0.85
K=16	0.95	0.85	0.8	0.81
K=16	0.89	0.86	0.78	0.86
K=16	0.9	0.89	0.82	0.82
K=16	0.87	0.91	0.81	0.79
K=16	0.94	0.83	0.87	0.86
K=16	0.96	0.89	0.8	0.83
K=16	0.92	0.9	0.84	0.85
K=16	0.91	0.86	0.87	0.87
K=16	0.91	0.77	0.86	0.91
K=16	0.88	0.87	0.82	0.83
K=16	0.92	0.83	0.85	0.8
K=16	0.94	0.86	0.82	0.83
K=16	0.92	0.87	0.89	0.91
K=16	0.87	0.8	0.85	0.87
K=16	0.92	0.82	0.78	0.88
K=16	0.92	0.86	0.86	0.88
K=16	0.91	0.88	0.88	0.86
K=16	0.92	0.92	0.86	0.83
K=16	0.96	0.88	0.89	0.8
K=16	0.94	0.84	0.83	0.79
K=16	0.88	0.86	0.84	0.78
K=16	0.92	0.87	0.86	0.85
K=16	0.91	0.86	0.91	0.81
K=16	0.92	0.91	0.84	0.86
K=16	0.93	0.82	0.8	0.87
K=16	0.91	0.88	0.86	0.8
K=16	0.95	0.86	0.85	0.85
K=16	0.94	0.88	0.82	0.78
K=16	0.94	0.91	0.84	0.78
K=16	0.93	0.85	0.82	0.8
K=16	0.94	0.83	0.85	0.8
K=16	0.88	0.88	0.91	0.83
K=16	0.94	0.9	0.89	0.82
K=16	0.89	0.88	0.82	0.81
K=16	0.93	0.85	0.8	0.89
K=16	0.95	0.87	0.87	0.87
K=16	0.95	0.88	0.9	0.87
K=16	0.96	0.85	0.86	0.88
K=16	0.91	0.9	0.86	0.84
K=16	0.91	0.9	0.82	0.84
K=16	0.94	0.86	0.85	0.83
K=16	0.95	0.81	0.89	0.83
K=16	0.87	0.87	0.79	0.88
K=16	0.94	0.86	0.84	0.8
K=16	0.94	0.87	0.85	0.81
K=16	0.9	0.87	0.9	0.84
K=16	0.91	0.86	0.77	0.85
K=16	0.93	0.84	0.85	0.82
K=16	0.94	0.9	0.88	0.86
K=16	0.91	0.88	0.83	0.86
K=16	0.93	0.84	0.81	0.85
K=16	0.86	0.87	0.84	0.92
K=16	0.91	0.88	0.9	0.8
K=16	0.9	0.8	0.86	0.82
K=16	0.89	0.82	0.84	0.85
K=16	0.93	0.89	0.82	0.89
K=16	0.94	0.84	0.87	0.91
K=16	0.86	0.88	0.88	0.81
K=16	0.92	0.8	0.85	0.89
K=16	0.92	0.88	0.82	0.86
K=16	0.95	0.86	0.88	0.84
K=16	0.9	0.88	0.89	0.82
K=16	0.93	0.89	0.85	0.85
K=16	0.93	0.83	0.83	0.84
K=16	0.9	0.91	0.86	0.79
K=16	0.89	0.84	0.81	0.83
K=16	0.89	0.87	0.86	0.89
K=16	0.92	0.81	0.8	0.85
K=16	0.92	0.9	0.86	0.76
K=16	0.89	0.92	0.89	0.8
K=16	0.93	0.88	0.88	0.89
K=16	0.9	0.83	0.86	0.89
K=16	0.94	0.88	0.82	0.87
K=16	0.92	0.81	0.8	0.86
K=16	0.93	0.81	0.81	0.88
K=16	0.97	0.9	0.85	0.82
K=16	0.89	0.87	0.88	0.87
K=16	0.92	0.9	0.82	0.79
K=16	0.91	0.86	0.84	0.79
K=16	0.94	0.89	0.84	0.83
K=16	0.92	0.84	0.85	0.78
K=16	0.89	0.89	0.84	0.84
K=16	0.95	0.9	0.81	0.83
K=16	0.95	0.87	0.89	0.8
K=16	0.93	0.83	0.83	0.89
K=16	0.94	0.9	0.85	0.87
K=16	0.97	0.87	0.77	0.88
K=16	0.93	0.83	0.88	0.85
K=16	0.94	0.91	0.86	0.87
K=16	0.92	0.95	0.85	0.86
K=16	0.9	0.86	0.8	0.85
K=16	0.91	0.91	0.84	0.84
K=16	0.93	0.83	0.91	0.87
K=16	0.93	0.86	0.86	0.86
K=16	0.94	0.86	0.82	0.92
K=16	0.9	0.88	0.89	0.84
K=16	0.94	0.85	0.83	0.87
K=16	0.93	0.86	0.87	0.8
K=16	0.92	0.89	0.83	0.9
K=16	0.9	0.88	0.82	0.84
K=16	0.97	0.9	0.84	0.86
K=16	0.94	0.89	0.85	0.9
K=16	0.96	0.89	0.85	0.87
K=16	0.9	0.85	0.85	0.82
K=16	0.9	0.86	0.78	0.82
K=16	0.87	0.9	0.81	0.79
K=16	0.94	0.87	0.85	0.94
K=16	0.95	0.79	0.91	0.86
K=16	0.93	0.89	0.82	0.85
K=16	0.91	0.9	0.8	0.94
K=16	0.88	0.85	0.82	0.85
K=16	0.95	0.88	0.84	0.87
K=16	0.9	0.88	0.85	0.74
K=16	0.94	0.82	0.84	0.84
K=16	0.9	0.83	0.86	0.85
K=16	0.95	0.93	0.84	0.85
K=16	0.93	0.88	0.87	0.83
K=16	0.92	0.86	0.87	0.85
K=16	0.92	0.88	0.84	0.83
K=16	0.94	0.87	0.82	0.84
K=16	0.9	0.9	0.81	0.81
K=16	0.92	0.85	0.82	0.89
K=16	0.95	0.86	0.84	0.78
K=16	0.85	0.87	0.83	0.79
K=16	0.87	0.79	0.92	0.84
K=16	0.95	0.86	0.82	0.83
K=16	0.88	0.87	0.87	0.85
K=16	0.94	0.87	0.83	0.87
K=16	0.91	0.81	0.9	0.79
K=16	0.94	0.89	0.83	0.83
K=16	0.91	0.85	0.81	0.81
K=16	0.91	0.81	0.81	0.79
K=16	0.93	0.81	0.83	0.77
K=16	0.9	0.89	0.89	0.83
K=16	0.85	0.9	0.84	0.83
K=16	0.94	0.85	0.84	0.86
K=16	0.93	0.87	0.81	0.83
K=16	0.89	0.85	0.89	0.84
K=16	0.87	0.9	0.93	0.8
[truncated: 4,003 more rows]

## Sheet: Boot_DBP_CCR
Result	SD=5	SD=10	SD=15	SD=20
K=16	0.99	0.93	0.86	0.88
K=16	0.97	0.89	0.91	0.82
K=16	0.98	0.93	0.89	0.85
K=16	0.98	0.93	0.96	0.71
K=16	0.98	0.93	0.88	0.76
K=16	0.99	0.93	0.81	0.79
K=16	0.98	0.93	0.89	0.79
K=16	0.97	0.92	0.89	0.67
K=16	0.99	0.89	0.9	0.82
K=16	0.97	0.94	0.92	0.86
K=16	0.98	0.92	0.94	0.79
K=16	0.99	0.9	0.87	0.88
K=16	0.98	0.93	0.88	0.75
K=16	0.99	0.93	0.92	0.84
K=16	0.98	0.89	0.85	0.82
K=16	0.97	0.89	0.83	0.78
K=16	1	0.9	0.87	0.81
K=16	0.98	0.96	0.84	0.78
K=16	0.97	0.94	0.95	0.81
K=16	0.99	0.94	0.84	0.86
K=16	0.97	0.92	0.9	0.76
K=16	1	0.91	0.91	0.82
K=16	0.99	0.88	0.87	0.81
K=16	0.99	0.9	0.92	0.88
K=16	0.99	0.95	0.81	0.81
K=16	0.98	0.89	0.91	0.79
K=16	1	0.91	0.86	0.8
K=16	0.99	0.94	0.87	0.77
K=16	0.95	0.91	0.84	0.8
K=16	1	0.93	0.86	0.87
K=16	0.97	0.91	0.86	0.85
K=16	0.97	0.85	0.9	0.73
K=16	0.98	0.97	0.87	0.83
K=16	0.97	0.86	0.85	0.81
K=16	0.97	0.89	0.87	0.75
K=16	0.99	0.9	0.87	0.81
K=16	0.99	0.87	0.93	0.87
K=16	0.98	0.95	0.82	0.83
K=16	1	0.92	0.82	0.83
K=16	0.95	0.94	0.92	0.84
K=16	1	0.93	0.84	0.88
K=16	0.98	0.91	0.86	0.74
K=16	0.98	0.91	0.92	0.84
K=16	0.97	0.88	0.88	0.8
K=16	0.98	0.92	0.9	0.84
K=16	0.98	0.91	0.86	0.78
K=16	0.97	0.9	0.81	0.84
K=16	0.99	0.94	0.85	0.79
K=16	0.97	0.86	0.88	0.85
K=16	0.99	0.89	0.86	0.8
K=16	0.99	0.9	0.87	0.81
K=16	0.98	0.92	0.9	0.82
K=16	0.99	0.91	0.86	0.85
K=16	0.99	0.92	0.88	0.86
K=16	0.98	0.9	0.86	0.79
K=16	0.96	0.88	0.8	0.8
K=16	0.98	0.92	0.93	0.78
K=16	0.98	0.85	0.84	0.84
K=16	1	0.95	0.87	0.86
K=16	0.98	0.96	0.87	0.77
K=16	0.98	0.93	0.88	0.79
K=16	0.99	0.89	0.85	0.82
K=16	0.95	0.92	0.88	0.8
K=16	0.95	0.89	0.87	0.8
K=16	0.99	0.91	0.86	0.83
K=16	0.98	0.93	0.89	0.73
K=16	0.97	0.91	0.87	0.79
K=16	0.98	0.9	0.87	0.82
K=16	0.97	0.96	0.85	0.81
K=16	0.98	0.94	0.86	0.75
K=16	1	0.95	0.89	0.81
K=16	0.94	0.9	0.88	0.84
K=16	0.97	0.88	0.83	0.81
K=16	0.99	0.89	0.91	0.73
K=16	0.98	0.93	0.84	0.76
K=16	1	0.9	0.83	0.8
K=16	0.97	0.93	0.93	0.79
K=16	1	0.96	0.84	0.79
K=16	0.99	0.9	0.88	0.85
K=16	0.97	0.95	0.9	0.75
K=16	1	0.86	0.83	0.79
K=16	0.99	0.89	0.91	0.88
K=16	0.97	0.96	0.84	0.79
K=16	0.97	0.94	0.85	0.79
K=16	0.99	0.86	0.88	0.81
K=16	1	0.91	0.86	0.8
K=16	1	0.85	0.85	0.81
K=16	1	0.89	0.91	0.8
K=16	1	0.92	0.91	0.73
K=16	1	0.94	0.86	0.81
K=16	0.99	0.92	0.86	0.83
K=16	0.99	0.96	0.92	0.83
K=16	0.97	0.88	0.9	0.8
K=16	0.99	0.91	0.88	0.86
K=16	0.99	0.97	0.83	0.77
K=16	1	0.92	0.93	0.85
K=16	0.99	0.95	0.89	0.74
K=16	0.96	0.9	0.83	0.77
K=16	0.98	0.92	0.88	0.77
K=16	1	0.93	0.88	0.8
K=16	0.99	0.91	0.87	0.77
K=16	0.99	0.88	0.87	0.85
K=16	0.99	0.92	0.93	0.77
K=16	0.98	0.91	0.86	0.82
K=16	0.99	0.91	0.93	0.83
K=16	0.97	0.92	0.89	0.78
K=16	1	0.91	0.85	0.85
K=16	1	0.91	0.79	0.77
K=16	0.97	0.89	0.87	0.8
K=16	0.98	0.95	0.84	0.82
K=16	1	0.93	0.87	0.79
K=16	0.97	0.93	0.94	0.86
K=16	1	0.97	0.86	0.89
K=16	1	0.88	0.83	0.83
K=16	0.98	0.88	0.83	0.89
K=16	0.97	0.89	0.91	0.82
K=16	0.98	0.95	0.88	0.85
K=16	0.96	0.89	0.87	0.89
K=16	0.97	0.91	0.93	0.81
K=16	1	0.91	0.89	0.81
K=16	0.97	0.85	0.83	0.85
K=16	0.96	0.92	0.88	0.79
K=16	1	0.91	0.86	0.82
K=16	0.98	0.9	0.9	0.82
K=16	0.99	0.93	0.82	0.8
K=16	0.97	0.93	0.84	0.79
K=16	1	0.86	0.95	0.87
K=16	0.96	0.92	0.85	0.76
K=16	1	0.91	0.88	0.85
K=16	0.98	0.91	0.88	0.78
K=16	0.98	0.97	0.86	0.8
K=16	0.97	0.9	0.82	0.86
K=16	0.98	0.88	0.86	0.83
K=16	0.98	0.94	0.86	0.8
K=16	0.97	0.94	0.92	0.81
K=16	0.95	0.88	0.87	0.82
K=16	0.99	0.93	0.81	0.8
K=16	1	0.9	0.87	0.82
K=16	0.96	0.95	0.81	0.78
K=16	0.95	0.9	0.9	0.77
K=16	0.99	0.87	0.85	0.79
K=16	0.97	0.91	0.83	0.89
K=16	0.98	0.86	0.83	0.83
K=16	0.96	0.89	0.89	0.79
K=16	0.98	0.87	0.89	0.82
K=16	0.96	0.94	0.87	0.81
K=16	0.97	0.88	0.88	0.86
K=16	0.98	0.97	0.93	0.84
K=16	0.97	0.94	0.85	0.9
K=16	0.99	0.91	0.85	0.83
K=16	1	0.95	0.93	0.74
K=16	1	0.88	0.92	0.85
K=16	0.98	0.92	0.93	0.72
K=16	0.96	0.9	0.86	0.73
K=16	0.97	0.9	0.82	0.78
K=16	0.99	0.9	0.87	0.77
K=16	0.98	0.93	0.89	0.82
K=16	0.99	0.9	0.9	0.88
K=16	0.98	0.95	0.86	0.76
K=16	0.98	0.95	0.88	0.74
K=16	0.99	0.94	0.85	0.78
K=16	0.97	0.93	0.88	0.75
K=16	0.95	0.91	0.9	0.76
K=16	0.97	0.86	0.82	0.75
K=16	1	0.92	0.85	0.81
K=16	0.98	0.92	0.93	0.78
K=16	0.98	0.91	0.91	0.85
K=16	0.99	0.88	0.87	0.83
K=16	0.98	0.93	0.86	0.81
K=16	1	0.9	0.85	0.84
K=16	0.98	0.92	0.85	0.76
K=16	0.96	0.92	0.84	0.86
K=16	0.97	0.96	0.89	0.89
K=16	0.97	0.88	0.89	0.84
K=16	0.98	0.91	0.92	0.81
K=16	0.99	0.86	0.92	0.83
K=16	0.96	0.9	0.85	0.83
K=16	0.96	0.88	0.86	0.81
K=16	0.99	0.9	0.85	0.81
K=16	0.99	0.86	0.86	0.88
K=16	1	0.87	0.79	0.83
K=16	1	0.9	0.91	0.85
K=16	0.97	0.87	0.86	0.88
K=16	0.97	0.96	0.94	0.75
K=16	0.99	0.91	0.88	0.83
K=16	0.97	0.98	0.83	0.8
K=16	0.98	0.91	0.87	0.81
K=16	0.99	0.97	0.88	0.84
K=16	0.97	0.93	0.86	0.84
K=16	0.97	0.89	0.89	0.81
K=16	1	0.89	0.92	0.82
K=16	1	0.92	0.85	0.84
K=16	0.98	0.92	0.84	0.75
K=16	0.99	0.9	0.86	0.77
K=16	0.98	0.9	0.86	0.8
K=16	0.99	0.93	0.88	0.81
K=16	0.99	0.9	0.89	0.85
K=16	1	0.96	0.87	0.8
K=16	0.96	0.92	0.85	0.77
K=16	1	0.87	0.87	0.9
K=16	1	0.91	0.91	0.86
K=16	0.97	0.97	0.89	0.84
K=16	0.98	0.89	0.88	0.78
K=16	0.99	0.95	0.85	0.78
K=16	0.99	0.89	0.84	0.81
K=16	0.98	0.92	0.88	0.77
K=16	0.98	0.93	0.88	0.8
K=16	0.97	0.95	0.87	0.83
K=16	0.98	0.93	0.85	0.79
K=16	0.98	0.88	0.9	0.76
K=16	0.99	0.89	0.9	0.83
K=16	1	0.87	0.8	0.81
K=16	0.99	0.92	0.87	0.82
K=16	1	0.89	0.82	0.81
K=16	1	0.93	0.86	0.79
K=16	0.99	0.91	0.85	0.78
K=16	1	0.88	0.83	0.81
K=16	0.99	0.93	0.86	0.88
K=16	0.97	0.95	0.86	0.8
K=16	0.99	0.9	0.86	0.78
K=16	1	0.92	0.87	0.81
K=16	0.97	0.92	0.85	0.89
K=16	0.97	0.96	0.93	0.76
K=16	0.96	0.91	0.9	0.82
K=16	1	0.89	0.89	0.85
K=16	0.98	0.91	0.86	0.85
K=16	1	0.92	0.91	0.79
K=16	0.96	0.94	0.88	0.69
K=16	0.97	0.9	0.85	0.79
K=16	0.98	0.9	0.89	0.81
K=16	0.95	0.87	0.85	0.83
K=16	1	0.88	0.85	0.88
K=16	0.96	0.93	0.86	0.84
K=16	0.99	0.96	0.87	0.81
K=16	0.98	0.87	0.87	0.88
K=16	0.97	0.86	0.88	0.8
K=16	0.97	0.92	0.82	0.78
K=16	0.99	0.92	0.87	0.85
K=16	1	0.91	0.9	0.83
K=16	1	0.89	0.88	0.84
K=16	0.91	0.92	0.89	0.83
K=16	0.97	0.9	0.86	0.8
K=16	0.99	0.91	0.89	0.73
K=16	0.97	0.9	0.84	0.88
K=16	0.99	0.95	0.91	0.86
K=16	1	0.92	0.9	0.83
K=16	0.98	0.9	0.91	0.77
K=16	0.98	0.91	0.86	0.83
K=16	0.97	0.89	0.91	0.74
K=16	0.98	0.89	0.89	0.79
K=16	1	0.91	0.88	0.79
K=16	0.99	0.91	0.86	0.84
K=16	1	0.94	0.83	0.77
K=16	0.99	0.9	0.84	0.8
K=16	0.97	0.9	0.85	0.82
K=16	0.99	0.96	0.93	0.85
K=16	1	0.97	0.82	0.85
K=16	0.98	0.9	0.87	0.85
K=16	0.98	0.9	0.84	0.84
K=16	0.97	0.9	0.88	0.81
K=16	0.98	0.87	0.86	0.84
K=16	0.98	0.88	0.86	0.83
K=16	0.95	0.93	0.88	0.75
K=16	0.97	0.91	0.91	0.84
K=16	1	0.92	0.88	0.76
K=16	0.96	0.86	0.85	0.87
K=16	0.98	0.94	0.86	0.8
K=16	0.97	0.91	0.87	0.78
K=16	1	0.94	0.84	0.78
K=16	0.98	0.9	0.86	0.92
K=16	0.95	0.9	0.92	0.74
K=16	0.97	0.9	0.93	0.78
K=16	0.98	0.92	0.79	0.78
K=16	1	0.93	0.87	0.79
K=16	0.97	0.9	0.86	0.81
K=16	1	0.9	0.85	0.88
K=16	0.98	0.88	0.86	0.79
K=16	0.98	0.88	0.84	0.84
K=16	0.98	0.92	0.86	0.79
K=16	0.98	0.9	0.86	0.83
K=16	0.97	0.92	0.85	0.76
K=16	1	0.89	0.88	0.8
K=16	0.95	0.93	0.89	0.85
K=16	0.97	0.92	0.86	0.81
K=16	0.98	0.92	0.85	0.82
K=16	0.99	0.93	0.83	0.8
K=16	0.99	0.9	0.86	0.87
K=16	0.98	0.94	0.86	0.81
K=16	0.97	0.94	0.87	0.79
K=16	0.98	0.86	0.91	0.84
K=16	1	0.91	0.87	0.79
K=16	0.99	0.92	0.83	0.81
K=16	0.97	0.96	0.89	0.78
K=16	0.98	0.9	0.88	0.83
K=16	0.99	0.89	0.78	0.79
K=16	1	0.92	0.92	0.72
K=16	0.98	0.9	0.92	0.88
K=16	0.98	0.91	0.85	0.79
K=16	0.99	0.9	0.88	0.78
K=16	0.96	0.92	0.91	0.83
K=16	0.96	0.93	0.9	0.81
K=16	1	0.87	0.86	0.81
K=16	0.99	0.95	0.86	0.71
K=16	0.97	0.93	0.85	0.89
K=16	1	0.89	0.81	0.78
K=16	0.99	0.91	0.9	0.78
K=16	0.99	0.88	0.9	0.76
K=16	0.98	0.86	0.85	0.75
K=16	1	0.85	0.88	0.78
K=16	1	0.89	0.87	0.84
K=16	0.97	0.89	0.87	0.83
K=16	1	0.92	0.87	0.75
K=16	0.99	0.88	0.91	0.87
K=16	1	0.93	0.89	0.8
K=16	0.97	0.86	0.94	0.75
K=16	0.99	0.91	0.89	0.81
K=16	0.98	0.94	0.9	0.81
K=16	0.97	0.95	0.86	0.85
K=16	0.97	0.87	0.87	0.84
K=16	0.98	0.89	0.9	0.85
K=16	0.98	0.89	0.9	0.88
K=16	0.99	0.94	0.88	0.83
K=16	0.98	0.86	0.85	0.78
K=16	0.98	0.88	0.83	0.79
K=16	0.99	0.96	0.86	0.8
K=16	0.97	0.91	0.94	0.85
K=16	1	0.9	0.82	0.74
K=16	0.99	0.91	0.82	0.82
K=16	0.98	0.85	0.82	0.78
K=16	0.97	0.9	0.87	0.83
K=16	0.98	0.91	0.88	0.87
K=16	0.99	0.94	0.89	0.85
K=16	0.98	0.94	0.85	0.83
K=16	0.98	0.87	0.84	0.8
K=16	0.96	0.94	0.87	0.8
K=16	0.99	0.9	0.87	0.87
K=16	0.95	0.94	0.88	0.84
K=16	0.98	0.85	0.85	0.88
K=16	1	0.88	0.88	0.83
K=16	0.99	0.87	0.9	0.81
K=16	0.96	0.9	0.88	0.84
K=16	0.99	0.89	0.91	0.83
K=16	0.98	0.89	0.87	0.76
K=16	0.96	0.9	0.84	0.8
K=16	0.97	0.91	0.82	0.78
K=16	0.99	0.94	0.9	0.81
K=16	0.99	0.9	0.91	0.76
K=16	1	0.93	0.9	0.86
K=16	0.98	0.91	0.9	0.87
K=16	0.96	0.91	0.93	0.82
K=16	0.99	0.92	0.85	0.8
K=16	0.97	0.9	0.89	0.76
K=16	0.98	0.92	0.91	0.8
K=16	0.98	0.93	0.89	0.79
K=16	1	0.91	0.89	0.86
K=16	0.99	0.94	0.96	0.71
K=16	1	0.9	0.89	0.83
K=16	0.98	0.88	0.86	0.79
K=16	1	0.86	0.9	0.82
K=16	0.97	0.93	0.9	0.81
K=16	0.97	0.93	0.87	0.77
K=16	0.96	0.85	0.85	0.79
K=16	0.97	0.91	0.92	0.84
K=16	1	0.88	0.88	0.8
K=16	0.96	0.92	0.89	0.79
K=16	1	0.91	0.89	0.83
K=16	1	0.9	0.88	0.83
K=16	0.98	0.92	0.85	0.74
K=16	0.96	0.92	0.84	0.82
K=16	0.97	0.86	0.82	0.87
K=16	0.99	0.94	0.85	0.82
K=16	0.98	0.93	0.85	0.82
K=16	0.98	0.95	0.88	0.8
K=16	0.99	0.89	0.92	0.79
K=16	0.99	0.89	0.83	0.79
K=16	0.99	0.92	0.82	0.8
K=16	0.96	0.92	0.85	0.86
K=16	0.99	0.94	0.9	0.82
K=16	0.99	0.92	0.89	0.78
K=16	0.97	0.94	0.9	0.84
K=16	0.97	0.93	0.92	0.84
K=16	0.98	0.91	0.88	0.73
K=16	1	0.9	0.93	0.81
K=16	0.98	0.95	0.9	0.83
K=16	1	0.92	0.8	0.74
K=16	0.99	0.87	0.88	0.81
K=16	0.97	0.88	0.9	0.87
K=16	0.98	0.88	0.84	0.84
K=16	0.99	0.94	0.82	0.86
K=16	0.99	0.92	0.89	0.82
K=16	0.99	0.89	0.9	0.79
K=16	1	0.91	0.88	0.8
K=16	0.98	0.91	0.88	0.83
K=16	0.99	0.9	0.89	0.83
K=16	0.96	0.89	0.89	0.83
K=16	1	0.9	0.91	0.78
K=16	0.99	0.92	0.94	0.78
K=16	0.96	0.88	0.93	0.74
K=16	0.98	0.98	0.9	0.84
K=16	0.99	0.87	0.91	0.89
K=16	0.99	0.89	0.87	0.8
K=16	0.96	0.94	0.85	0.84
K=16	0.98	0.94	0.87	0.77
K=16	0.95	0.9	0.85	0.76
K=16	0.97	0.93	0.87	0.85
K=16	1	0.94	0.88	0.9
K=16	0.98	0.97	0.86	0.82
K=16	0.98	0.87	0.86	0.77
K=16	0.98	0.91	0.88	0.79
K=16	0.97	0.92	0.81	0.83
K=16	0.99	0.95	0.84	0.86
K=16	0.99	0.94	0.9	0.87
K=16	0.98	0.9	0.88	0.72
K=16	0.96	0.93	0.87	0.81
K=16	0.96	0.91	0.87	0.83
K=16	0.98	0.93	0.86	0.78
K=16	0.99	0.86	0.93	0.83
K=16	0.96	0.87	0.89	0.7
K=16	0.99	0.89	0.86	0.85
K=16	0.98	0.94	0.83	0.85
K=16	0.97	0.89	0.85	0.86
K=16	1	0.88	0.87	0.79
K=16	0.96	0.92	0.89	0.72
K=16	0.97	0.86	0.87	0.86
K=16	0.97	0.97	0.9	0.79
K=16	0.99	0.9	0.91	0.83
K=16	0.97	0.92	0.87	0.77
K=16	0.97	0.93	0.89	0.86
K=16	0.99	0.95	0.89	0.76
K=16	0.97	0.94	0.9	0.85
K=16	0.97	0.95	0.95	0.84
K=16	0.96	0.92	0.85	0.82
K=16	0.97	0.91	0.9	0.81
K=16	1	0.89	0.88	0.84
K=16	0.98	0.95	0.89	0.81
K=16	0.99	0.88	0.87	0.75
K=16	0.98	0.9	0.85	0.88
K=16	0.98	0.85	0.83	0.76
K=16	1	0.89	0.82	0.78
K=16	0.98	0.94	0.87	0.75
K=16	1	0.92	0.89	0.88
K=16	0.99	0.94	0.83	0.87
K=16	1	0.93	0.81	0.84
K=16	1	0.88	0.79	0.77
K=16	0.97	0.9	0.85	0.75
K=16	0.98	0.88	0.8	0.79
K=16	0.96	0.86	0.88	0.88
K=16	1	0.89	0.85	0.78
K=16	0.97	0.92	0.87	0.85
K=16	0.99	0.88	0.9	0.79
K=16	1	0.88	0.86	0.9
K=16	1	0.88	0.87	0.8
K=16	1	0.9	0.82	0.8
K=16	0.97	0.94	0.88	0.8
K=16	1	0.92	0.87	0.76
K=16	0.98	0.86	0.89	0.74
K=16	0.99	0.92	0.86	0.83
K=16	0.97	0.92	0.91	0.82
K=16	0.98	0.89	0.82	0.78
K=16	0.99	0.93	0.93	0.84
K=16	0.99	0.87	0.84	0.85
K=16	1	0.83	0.84	0.79
K=16	0.97	0.91	0.89	0.78
K=16	1	0.94	0.87	0.88
K=16	0.99	0.94	0.84	0.88
K=16	0.97	0.89	0.88	0.79
K=16	0.99	0.92	0.9	0.81
K=16	0.99	0.99	0.85	0.83
K=16	0.98	0.93	0.88	0.74
K=16	0.97	0.94	0.88	0.9
K=16	1	0.92	0.88	0.89
K=16	0.99	0.9	0.88	0.86
K=16	0.99	0.91	0.93	0.85
K=16	0.93	0.88	0.92	0.81
K=16	0.99	0.95	0.91	0.82
K=16	0.99	0.87	0.89	0.73
K=16	0.99	0.92	0.89	0.78
K=16	0.99	0.93	0.89	0.88
K=16	0.93	0.9	0.85	0.78
K=16	0.96	0.89	0.86	0.77
K=16	0.96	0.9	0.78	0.87
K=16	0.98	0.91	0.82	0.85
K=16	0.98	0.91	0.85	0.73
K=16	0.99	0.91	0.85	0.8
K=16	0.99	0.88	0.87	0.77
K=16	0.98	0.88	0.84	0.82
K=16	0.99	0.84	0.85	0.79
K=16	0.98	0.92	0.87	0.71
K=16	0.99	0.95	0.86	0.84
K=16	0.98	0.95	0.89	0.77
K=16	0.97	0.87	0.86	0.79
K=16	0.98	0.9	0.89	0.77
K=16	0.99	0.88	0.85	0.79
K=16	0.99	0.87	0.85	0.77
K=16	0.98	0.93	0.91	0.78
K=16	1	0.9	0.92	0.85
K=16	0.97	0.9	0.84	0.81
K=16	0.97	0.83	0.91	0.81
K=16	0.99	0.96	0.87	0.82
K=16	0.97	0.9	0.9	0.78
K=16	0.98	1	0.8	0.76
K=16	0.97	0.95	0.91	0.81
K=16	0.98	0.9	0.87	0.8
K=16	0.98	0.95	0.88	0.85
K=16	0.99	0.9	0.79	0.91
K=16	0.96	0.9	0.83	0.85
K=16	0.98	0.92	0.91	0.83
K=16	0.98	0.89	0.88	0.87
K=16	0.96	0.94	0.89	0.78
K=16	1	0.92	0.85	0.8
K=16	0.98	0.9	0.92	0.81
K=16	0.99	0.97	0.82	0.84
K=16	0.96	0.9	0.87	0.84
K=16	0.97	0.95	0.84	0.8
K=16	0.97	0.88	0.82	0.76
K=16	0.98	0.91	0.92	0.84
K=16	0.96	0.94	0.85	0.84
K=16	0.98	0.89	0.9	0.83
K=16	0.98	0.87	0.83	0.78
K=16	0.99	0.92	0.88	0.86
K=16	1	0.88	0.9	0.8
K=16	0.99	0.89	0.95	0.82
K=16	0.99	0.9	0.87	0.86
K=16	1	0.85	0.83	0.79
K=16	0.98	0.9	0.89	0.86
K=16	0.97	0.97	0.83	0.8
K=16	0.99	0.92	0.91	0.86
K=16	1	0.85	0.87	0.88
K=16	0.98	0.9	0.92	0.8
K=16	0.96	0.91	0.81	0.82
K=16	0.99	0.89	0.86	0.88
K=16	1	0.88	0.86	0.79
K=16	1	0.92	0.9	0.81
K=16	0.96	0.93	0.82	0.78
K=16	0.96	0.92	0.86	0.82
K=16	0.96	0.93	0.85	0.78
K=16	0.94	0.84	0.92	0.83
K=16	0.99	0.88	0.83	0.81
K=16	1	0.92	0.88	0.79
K=16	0.99	0.96	0.86	0.76
K=16	0.99	0.93	0.91	0.82
K=16	0.99	0.88	0.96	0.87
K=16	0.98	0.94	0.89	0.81
K=16	1	0.89	0.82	0.86
K=16	0.97	0.91	0.84	0.82
K=16	0.98	0.86	0.93	0.8
K=16	0.97	0.88	0.77	0.87
K=16	0.97	0.92	0.86	0.77
K=16	0.99	0.92	0.81	0.82
K=16	0.97	0.89	0.84	0.82
K=16	0.99	0.93	0.87	0.83
K=16	1	0.89	0.85	0.81
K=16	0.96	0.89	0.85	0.84
K=16	1	0.9	0.91	0.8
K=16	0.99	0.85	0.91	0.81
K=16	0.99	0.92	0.87	0.85
K=16	0.98	0.89	0.91	0.86
K=16	0.99	0.97	0.92	0.85
K=16	1	0.88	0.84	0.87
K=16	0.99	0.91	0.88	0.78
K=16	1	0.93	0.88	0.76
K=16	0.97	0.97	0.92	0.9
K=16	0.98	0.92	0.89	0.86
K=16	0.98	0.91	0.86	0.83
K=16	1	0.9	0.92	0.82
K=16	0.96	0.92	0.94	0.83
K=16	0.99	0.92	0.9	0.81
K=16	0.99	0.9	0.89	0.81
K=16	0.98	0.94	0.9	0.78
K=16	1	0.91	0.86	0.8
K=16	0.99	0.9	0.88	0.77
K=16	0.99	0.89	0.82	0.8
K=16	1	0.95	0.86	0.8
K=16	0.96	0.91	0.84	0.82
K=16	0.99	0.92	0.84	0.78
K=16	1	0.93	0.83	0.8
K=16	0.99	0.91	0.89	0.84
K=16	0.97	0.91	0.88	0.86
K=16	0.99	0.91	0.9	0.81
K=16	0.98	0.92	0.9	0.81
K=16	0.98	0.9	0.86	0.82
K=16	0.98	0.91	0.85	0.83
K=16	0.96	0.95	0.92	0.86
K=16	0.96	0.88	0.83	0.84
K=16	0.99	0.95	0.89	0.78
K=16	0.94	0.89	0.85	0.76
K=16	0.95	0.91	0.91	0.82
K=16	1	0.92	0.93	0.8
K=16	0.95	0.92	0.83	0.75
K=16	1	0.94	0.86	0.8
K=16	1	0.88	0.94	0.79
K=16	0.99	0.88	0.85	0.74
K=16	0.97	0.93	0.86	0.83
K=16	0.95	0.88	0.91	0.8
K=16	0.99	0.93	0.89	0.85
K=16	0.99	0.9	0.85	0.82
K=16	1	0.94	0.87	0.83
K=16	1	0.93	0.9	0.83
K=16	0.97	0.92	0.89	0.78
K=16	0.98	0.9	0.91	0.75
K=16	0.97	0.91	0.88	0.81
K=16	0.99	0.9	0.92	0.75
K=16	0.96	0.91	0.91	0.85
K=16	1	0.92	0.83	0.83
K=16	1	0.95	0.88	0.76
K=16	1	0.95	0.92	0.79
K=16	0.95	0.93	0.91	0.77
K=16	0.97	0.89	0.87	0.85
K=16	0.99	0.94	0.87	0.76
K=16	0.99	0.88	0.88	0.76
K=16	0.97	0.89	0.87	0.87
K=16	0.96	0.88	0.87	0.87
K=16	0.97	0.92	0.82	0.85
K=16	1	0.93	0.91	0.85
K=16	0.98	0.88	0.87	0.83
K=16	0.99	0.92	0.89	0.83
K=16	1	0.93	0.93	0.81
K=16	0.97	0.93	0.9	0.83
K=16	1	0.9	0.82	0.78
K=16	0.96	0.95	0.86	0.68
K=16	0.98	0.93	0.9	0.83
K=16	0.97	0.94	0.88	0.82
K=16	0.98	0.93	0.85	0.81
K=16	0.99	0.87	0.9	0.84
K=16	1	0.93	0.84	0.73
K=16	0.98	0.92	0.9	0.81
K=16	0.96	0.87	0.88	0.86
K=16	0.99	0.93	0.92	0.78
K=16	0.99	0.89	0.88	0.77
K=16	1	0.95	0.87	0.82
K=16	0.96	0.92	0.89	0.82
K=16	0.96	0.92	0.81	0.82
K=16	1	0.92	0.87	0.82
K=16	0.99	0.89	0.86	0.84
K=16	0.98	0.93	0.91	0.8
K=16	0.99	0.89	0.88	0.84
K=16	0.99	0.87	0.88	0.8
K=16	0.98	0.96	0.84	0.79
K=16	0.98	0.9	0.81	0.77
K=16	0.98	0.89	0.87	0.83
K=16	1	0.94	0.9	0.84
K=16	0.99	0.86	0.92	0.76
K=16	0.98	0.9	0.87	0.77
K=16	0.98	0.89	0.87	0.8
K=16	1	0.91	0.87	0.83
K=16	1	0.91	0.79	0.78
K=16	0.99	0.86	0.82	0.76
K=16	0.99	0.93	0.84	0.83
K=16	1	0.91	0.92	0.81
K=16	0.97	0.93	0.88	0.9
K=16	0.95	0.91	0.87	0.83
K=16	0.97	0.89	0.87	0.84
K=16	0.97	0.92	0.86	0.86
K=16	0.98	0.88	0.87	0.8
K=16	0.95	0.89	0.87	0.77
K=16	0.99	0.93	0.9	0.81
K=16	0.97	0.91	0.85	0.86
K=16	0.98	0.88	0.82	0.8
K=16	0.97	0.88	0.89	0.8
K=16	0.96	0.92	0.86	0.86
K=16	1	0.95	0.89	0.79
K=16	1	0.92	0.9	0.77
K=16	0.99	0.9	0.86	0.69
K=16	0.95	0.9	0.86	0.74
K=16	0.99	0.92	0.8	0.85
K=16	0.98	0.91	0.85	0.81
K=16	0.97	0.93	0.89	0.8
K=16	1	0.93	0.84	0.81
K=16	0.98	0.89	0.84	0.77
K=16	1	0.92	0.85	0.78
K=16	0.94	0.9	0.89	0.77
K=16	0.99	0.91	0.82	0.77
K=16	1	0.9	0.86	0.91
K=16	0.96	0.92	0.9	0.83
K=16	1	0.9	0.88	0.77
K=16	0.98	0.9	0.91	0.89
K=16	0.98	0.91	0.84	0.8
K=16	0.95	0.95	0.84	0.87
K=16	0.99	0.94	0.82	0.79
K=16	0.98	0.95	0.9	0.74
K=16	0.96	0.95	0.86	0.8
K=16	1	0.88	0.81	0.83
K=16	0.95	0.94	0.88	0.78
K=16	0.98	0.93	0.91	0.81
K=16	0.98	0.9	0.86	0.85
K=16	0.99	0.92	0.85	0.85
K=16	0.94	0.89	0.87	0.85
K=16	0.97	0.97	0.88	0.82
K=16	0.97	0.9	0.87	0.79
K=16	0.99	0.92	0.82	0.8
K=16	0.97	0.86	0.91	0.8
K=16	0.97	0.9	0.82	0.81
K=16	0.99	0.94	0.9	0.87
K=16	0.99	0.91	0.92	0.77
K=16	0.96	0.92	0.88	0.87
K=16	0.97	0.93	0.91	0.77
K=16	0.98	0.94	0.91	0.74
K=16	1	0.9	0.87	0.8
K=16	0.97	0.93	0.85	0.78
K=16	1	0.93	0.83	0.78
K=16	0.94	0.95	0.87	0.77
K=16	1	0.95	0.88	0.82
K=16	0.98	0.9	0.89	0.74
K=16	0.98	0.91	0.85	0.81
K=16	0.98	0.93	0.9	0.78
K=16	0.98	0.93	0.87	0.82
K=16	0.97	0.87	0.84	0.85
K=16	0.94	0.86	0.87	0.83
K=16	1	0.9	0.88	0.83
K=16	0.99	0.94	0.86	0.71
K=16	0.97	0.89	0.89	0.79
K=16	0.99	0.92	0.9	0.86
K=16	1	0.87	0.87	0.79
K=16	0.94	0.91	0.85	0.84
K=16	1	0.9	0.81	0.76
K=16	0.99	0.92	0.86	0.75
K=16	0.98	0.93	0.9	0.81
K=16	1	0.9	0.92	0.81
K=16	0.98	0.87	0.88	0.78
K=16	0.98	0.89	0.9	0.79
K=16	0.99	0.89	0.87	0.74
K=16	0.97	0.86	0.9	0.79
K=16	0.98	0.92	0.82	0.88
K=16	0.97	0.88	0.83	0.79
K=16	0.99	0.9	0.92	0.81
K=16	0.97	0.88	0.92	0.77
K=16	0.97	0.89	0.81	0.75
K=16	1	0.9	0.86	0.84
K=16	0.98	0.88	0.85	0.89
K=16	0.99	0.91	0.88	0.84
K=16	0.99	0.89	0.87	0.8
K=16	0.99	0.96	0.88	0.88
K=16	0.98	0.93	0.81	0.79
K=16	0.97	0.93	0.82	0.79
K=16	0.96	0.94	0.85	0.8
K=16	0.97	0.93	0.85	0.82
K=16	0.97	0.91	0.89	0.81
K=16	0.97	0.92	0.9	0.81
K=16	0.98	0.94	0.87	0.72
K=16	1	0.92	0.85	0.78
K=16	0.98	0.88	0.86	0.79
K=16	0.98	0.94	0.91	0.78
K=16	1	0.93	0.88	0.75
K=16	1	0.91	0.88	0.85
K=16	1	0.96	0.92	0.78
K=16	0.99	0.9	0.87	0.8
K=16	1	0.91	0.91	0.86
K=16	0.98	0.91	0.89	0.84
K=16	0.99	0.93	0.87	0.78
K=16	0.99	0.87	0.85	0.8
K=16	1	0.85	0.84	0.84
K=16	0.98	0.92	0.86	0.8
K=16	1	0.93	0.84	0.78
K=16	0.98	0.88	0.9	0.81
K=16	0.98	0.94	0.9	0.78
K=16	1	0.94	0.86	0.77
K=16	1	0.9	0.86	0.86
K=16	1	0.89	0.92	0.87
K=16	0.98	0.91	0.91	0.81
K=16	0.97	0.9	0.83	0.75
K=16	0.98	0.95	0.88	0.86
K=16	0.98	0.9	0.91	0.83
K=16	1	0.88	0.93	0.85
K=16	0.99	0.86	0.85	0.85
K=16	0.97	0.88	0.93	0.78
K=16	0.99	0.94	0.79	0.85
K=16	1	0.92	0.91	0.74
K=16	0.98	0.91	0.89	0.84
K=16	1	0.9	0.87	0.86
K=16	1	0.92	0.88	0.84
K=16	1	0.95	0.89	0.84
K=16	1	0.87	0.85	0.82
K=16	0.97	0.89	0.89	0.81
K=16	0.97	0.92	0.89	0.78
K=16	0.98	0.9	0.83	0.86
K=16	0.99	0.91	0.88	0.7
K=16	0.97	0.93	0.91	0.87
K=16	0.97	0.89	0.84	0.81
K=16	0.98	0.9	0.82	0.79
K=16	0.97	0.93	0.86	0.83
K=16	0.99	0.85	0.85	0.77
K=16	1	0.89	0.92	0.82
K=16	0.98	0.89	0.84	0.81
K=16	0.98	0.89	0.91	0.84
K=16	0.96	0.91	0.88	0.82
K=16	0.95	0.89	0.84	0.82
K=16	0.99	0.91	0.81	0.89
K=16	0.99	0.92	0.83	0.81
K=16	0.99	0.9	0.86	0.79
K=16	0.99	0.94	0.86	0.81
K=16	0.99	0.93	0.87	0.83
K=16	0.99	0.92	0.89	0.79
K=16	1	0.91	0.9	0.74
K=16	0.95	0.93	0.84	0.83
K=16	0.97	0.91	0.86	0.78
K=16	1	0.84	0.88	0.82
K=16	0.98	0.89	0.84	0.82
K=16	1	0.9	0.87	0.86
K=16	1	0.93	0.85	0.84
K=16	0.99	0.91	0.91	0.81
K=16	0.98	0.9	0.88	0.83
K=16	0.98	0.87	0.82	0.88
K=16	0.98	0.95	0.89	0.85
K=16	0.96	0.87	0.86	0.81
K=16	0.96	0.94	0.9	0.82
K=16	0.95	0.87	0.88	0.84
K=16	0.98	0.9	0.88	0.82
K=16	0.97	0.92	0.83	0.76
K=16	1	0.9	0.92	0.81
K=16	0.98	0.89	0.86	0.85
K=16	0.96	0.97	0.9	0.77
K=16	1	0.88	0.76	0.84
K=16	0.96	0.92	0.88	0.84
K=16	0.98	0.93	0.87	0.84
K=16	1	0.88	0.83	0.85
K=16	1	0.9	0.87	0.76
K=16	0.99	0.91	0.92	0.72
K=16	0.99	0.9	0.83	0.79
K=16	1	0.88	0.91	0.83
K=16	0.99	0.91	0.89	0.81
K=16	1	0.93	0.88	0.82
K=16	0.95	0.95	0.87	0.83
K=16	0.98	0.89	0.81	0.84
K=16	0.99	0.93	0.9	0.82
K=16	0.99	0.92	0.87	0.78
K=16	0.95	0.86	0.87	0.79
K=16	1	0.92	0.9	0.84
K=16	0.99	0.85	0.91	0.72
K=16	0.97	0.92	0.92	0.85
K=16	0.98	0.93	0.8	0.77
K=16	0.97	0.94	0.89	0.82
K=16	0.97	0.9	0.87	0.82
K=16	0.99	0.91	0.88	0.81
K=16	0.97	0.89	0.85	0.8
K=16	0.96	0.89	0.89	0.86
K=16	0.99	0.92	0.89	0.81
K=16	0.98	0.93	0.91	0.89
K=16	0.99	0.9	0.83	0.76
K=16	0.97	0.9	0.94	0.8
K=16	0.99	0.91	0.87	0.77
K=16	0.98	0.9	0.86	0.85
K=16	0.99	0.9	0.88	0.79
K=16	1	0.85	0.87	0.91
K=16	0.98	0.9	0.89	0.78
K=16	1	0.93	0.84	0.79
K=16	0.97	0.94	0.87	0.82
K=16	0.96	0.88	0.8	0.76
K=16	0.98	0.92	0.79	0.84
K=16	0.98	0.92	0.88	0.83
K=16	1	0.96	0.92	0.79
K=16	0.99	0.9	0.85	0.83
K=16	1	0.9	0.85	0.82
K=16	0.97	0.93	0.81	0.73
K=16	0.96	0.9	0.91	0.83
K=16	0.97	0.96	0.84	0.8
K=16	1	0.89	0.86	0.81
K=16	0.99	0.9	0.89	0.78
K=16	0.99	0.93	0.85	0.75
K=16	0.99	0.9	0.91	0.83
K=16	0.97	0.88	0.87	0.77
K=16	0.98	0.92	0.86	0.81
K=16	1	0.94	0.89	0.85
K=16	0.99	0.9	0.86	0.84
K=16	1	0.97	0.93	0.78
K=16	0.96	0.9	0.87	0.84
K=16	0.98	0.85	0.88	0.75
K=16	0.97	0.91	0.87	0.86
K=16	0.98	0.95	0.92	0.82
K=16	0.99	0.96	0.86	0.75
K=16	0.97	0.91	0.87	0.77
K=16	0.98	0.92	0.84	0.78
K=16	0.95	0.87	0.88	0.82
K=16	0.99	0.91	0.86	0.8
K=16	1	0.93	0.88	0.86
K=16	0.97	0.91	0.87	0.75
K=16	0.98	0.85	0.93	0.86
K=16	0.98	0.96	0.89	0.77
K=16	0.98	0.9	0.88	0.83
K=16	0.98	0.96	0.88	0.86
K=16	0.96	0.91	0.88	0.83
K=16	0.98	0.97	0.92	0.79
K=16	0.96	0.89	0.92	0.81
K=16	0.97	0.94	0.88	0.8
K=16	0.98	0.93	0.87	0.83
K=16	0.97	0.89	0.85	0.81
K=16	0.96	0.93	0.88	0.82
K=16	1	0.91	0.92	0.7
K=16	0.99	0.86	0.89	0.73
K=16	0.97	0.89	0.86	0.78
K=16	0.97	0.9	0.84	0.73
K=16	1	0.9	0.92	0.78
K=16	1	0.87	0.85	0.8
K=16	0.98	0.88	0.91	0.86
K=16	1	0.9	0.92	0.8
K=16	0.98	0.85	0.9	0.83
K=16	1	0.91	0.85	0.84
K=16	0.98	0.9	0.89	0.77
K=16	0.99	0.9	0.88	0.81
K=16	0.97	0.9	0.89	0.78
K=16	0.99	0.91	0.86	0.79
K=16	0.99	0.91	0.87	0.85
K=16	0.97	0.93	0.84	0.8
K=16	0.97	0.96	0.84	0.8
K=16	0.99	0.9	0.84	0.84
K=16	0.95	0.9	0.87	0.82
K=16	0.99	0.95	0.84	0.8
K=16	0.99	0.94	0.89	0.8
K=16	0.98	0.92	0.88	0.7
K=16	0.98	0.93	0.87	0.8
K=16	1	0.93	0.86	0.79
K=16	0.98	0.95	0.87	0.84
K=16	1	0.93	0.9	0.85
K=16	0.99	0.86	0.87	0.82
K=16	0.98	0.93	0.85	0.8
K=16	0.97	0.91	0.85	0.78
K=16	0.99	0.91	0.86	0.79
K=16	0.98	0.92	0.91	0.78
K=16	0.96	0.9	0.83	0.85
K=16	0.97	0.93	0.87	0.83
K=16	0.97	0.95	0.86	0.8
K=16	1	0.88	0.84	0.75
K=16	0.98	0.93	0.88	0.85
K=16	0.98	0.93	0.88	0.79
K=16	0.96	0.9	0.87	0.82
K=16	0.98	0.93	0.87	0.82
K=16	0.99	0.95	0.91	0.83
K=16	0.97	0.86	0.86	0.8
K=16	0.99	0.93	0.83	0.81
K=16	1	0.95	0.9	0.89
K=16	0.99	0.9	0.89	0.82
K=16	0.97	0.92	0.9	0.74
K=16	0.98	0.93	0.85	0.75
K=16	0.98	0.9	0.91	0.8
K=16	0.98	0.89	0.92	0.83
K=16	0.97	0.95	0.88	0.82
K=16	0.98	0.91	0.79	0.8
K=16	0.99	0.93	0.88	0.8
K=16	0.98	0.91	0.87	0.89
K=16	1	0.93	0.86	0.9
K=16	0.97	0.86	0.87	0.82
K=16	0.97	0.94	0.9	0.78
K=16	0.95	0.93	0.84	0.85
K=16	1	0.92	0.87	0.8
K=16	0.99	0.88	0.87	0.79
K=16	0.93	0.95	0.77	0.84
K=16	0.96	0.95	0.86	0.91
K=16	0.98	0.9	0.87	0.75
K=16	1	0.92	0.91	0.8
K=16	0.99	0.9	0.86	0.74
K=16	0.97	0.91	0.82	0.77
K=16	0.97	0.9	0.89	0.84
K=16	0.99	0.91	0.89	0.8
K=16	0.94	0.89	0.85	0.8
K=16	0.98	0.95	0.87	0.81
K=16	0.97	0.95	0.89	0.83
K=16	0.99	0.94	0.93	0.79
K=16	0.98	0.93	0.92	0.82
K=16	0.99	0.94	0.83	0.82
K=16	1	0.91	0.88	0.86
K=16	1	0.87	0.87	0.79
K=16	0.99	0.95	0.92	0.81
K=16	0.99	0.9	0.88	0.81
K=16	0.99	0.95	0.87	0.76
K=16	1	0.88	0.89	0.84
K=16	0.96	0.9	0.88	0.77
K=16	0.97	0.93	0.86	0.77
K=16	0.98	0.94	0.88	0.79
K=16	1	0.9	0.83	0.83
K=16	0.95	0.88	0.87	0.75
K=16	1	0.9	0.9	0.78
K=16	0.98	0.92	0.88	0.78
K=16	0.98	0.88	0.86	0.81
K=16	0.98	0.88	0.88	0.78
K=16	1	0.95	0.83	0.78
K=16	0.98	0.92	0.83	0.8
K=16	0.96	0.89	0.84	0.77
K=16	1	0.96	0.9	0.85
K=16	1	0.94	0.86	0.87
K=16	0.98	0.85	0.88	0.79
K=16	0.97	0.91	0.86	0.78
K=16	1	0.89	0.85	0.79
K=16	1	0.93	0.88	0.83
K=16	0.98	0.92	0.84	0.84
K=16	0.96	0.93	0.89	0.86
K=16	1	0.91	0.87	0.85
K=16	0.94	0.96	0.86	0.79
K=16	0.99	0.96	0.9	0.74
K=16	0.99	0.91	0.86	0.75
K=16	0.98	0.86	0.94	0.83
K=16	0.97	0.89	0.85	0.75
K=16	0.99	0.89	0.88	0.78
K=16	0.98	0.93	0.88	0.78
K=16	0.97	0.91	0.86	0.77
K=16	0.98	0.95	0.91	0.82
K=16	0.97	0.89	0.85	0.79
K=16	0.98	0.89	0.89	0.72
K=16	0.98	0.89	0.87	0.82
K=16	0.97	0.89	0.85	0.75
K=16	0.98	0.86	0.86	0.86
K=16	0.97	0.89	0.94	0.81
K=16	0.95	0.91	0.91	0.82
K=16	0.97	0.86	0.84	0.8
K=16	0.97	0.94	0.87	0.8
K=16	0.98	0.9	0.89	0.8
K=16	0.97	0.86	0.89	0.79
K=16	0.97	0.91	0.89	0.77
K=16	0.99	0.89	0.82	0.82
K=16	0.98	0.93	0.87	0.77
K=16	0.97	0.91	0.89	0.76
K=16	0.98	0.89	0.88	0.83
K=16	0.96	0.87	0.87	0.79
K=16	1	0.91	0.92	0.79
K=16	0.95	0.9	0.88	0.83
K=16	1	0.88	0.83	0.85
K=16	0.98	0.87	0.88	0.78
K=16	0.97	0.94	0.82	0.85
K=16	0.99	0.91	0.88	0.84
K=16	0.98	0.93	0.85	0.75
K=16	0.94	0.93	0.86	0.71
K=16	0.98	0.92	0.88	0.81
K=16	1	0.93	0.86	0.88
K=16	1	0.95	0.82	0.79
K=16	0.97	0.86	0.91	0.78
K=16	0.99	0.88	0.88	0.91
K=16	0.99	0.93	0.9	0.79
K=16	0.98	0.96	0.85	0.81
K=16	0.98	0.91	0.9	0.81
K=16	1	0.94	0.86	0.8
K=16	0.99	0.91	0.9	0.77
K=16	0.96	0.9	0.88	0.8
K=16	0.97	0.78	0.91	0.84
K=16	0.99	0.91	0.92	0.79
K=16	0.98	0.87	0.85	0.75
K=16	1	0.92	0.82	0.77
K=16	0.96	0.89	0.88	0.85
K=16	0.97	0.89	0.86	0.87
K=16	0.98	0.89	0.9	0.8
K=16	0.98	0.92	0.89	0.81
K=16	1	0.91	0.8	0.83
K=16	0.99	0.92	0.82	0.79
K=16	0.99	0.91	0.87	0.86
K=16	0.97	0.89	0.88	0.77
K=16	0.98	0.92	0.91	0.79
K=16	1	0.88	0.86	0.79
K=16	1	0.9	0.82	0.73
K=16	1	0.96	0.92	0.83
K=16	0.98	0.93	0.88	0.7
K=16	0.97	0.9	0.87	0.83
K=16	0.98	0.88	0.86	0.84
K=16	0.96	0.91	0.85	0.87
K=16	1	0.95	0.86	0.88
K=16	0.97	0.87	0.88	0.84
K=16	1	0.93	0.85	0.8
K=16	0.99	0.9	0.93	0.84
K=16	0.97	0.89	0.89	0.9
K=16	0.98	0.95	0.89	0.81
K=16	0.99	0.9	0.8	0.81
K=16	0.98	0.91	0.89	0.89
K=16	0.98	0.93	0.86	0.82
K=16	1	0.92	0.87	0.86
K=16	0.97	0.89	0.91	0.83
K=16	0.99	0.89	0.91	0.85
K=16	0.97	0.95	0.91	0.8
K=16	1	0.91	0.83	0.82
K=16	0.97	0.92	0.84	0.81
K=16	0.99	0.95	0.87	0.87
K=16	0.99	0.93	0.91	0.75
K=16	0.98	0.91	0.93	0.85
K=16	0.95	0.96	0.89	0.81
K=16	1	0.93	0.84	0.82
K=16	0.95	0.95	0.88	0.87
K=16	0.94	0.97	0.88	0.79
K=16	0.99	0.91	0.86	0.82
K=16	1	0.89	0.87	0.81
K=16	0.99	0.95	0.85	0.78
K=16	0.99	0.87	0.88	0.76
K=16	0.98	0.95	0.84	0.83
K=16	0.95	0.95	0.91	0.87
K=16	0.97	0.89	0.88	0.87
K=16	1	0.92	0.86	0.82
K=16	0.99	0.9	0.93	0.75
K=16	0.96	0.9	0.84	0.79
K=16	1	0.91	0.87	0.84
K=16	0.98	0.92	0.74	0.82
K=16	0.98	0.88	0.87	0.79
K=16	0.95	0.88	0.88	0.82
K=16	1	0.88	0.82	0.85
K=16	0.98	0.9	0.94	0.76
K=16	0.99	0.94	0.84	0.81
K=16	0.98	0.88	0.91	0.81
K=16	0.95	0.85	0.84	0.84
K=16	0.98	0.91	0.8	0.76
K=16	1	0.86	0.91	0.74
K=16	0.98	0.95	0.9	0.87
K=16	0.99	0.93	0.91	0.83
K=16	0.97	0.88	0.84	0.83
K=16	1	0.9	0.87	0.79
K=16	0.97	0.88	0.88	0.85
K=16	0.98	0.86	0.91	0.76
K=16	0.97	0.92	0.88	0.81
K=16	1	0.86	0.91	0.88
K=16	0.98	0.94	0.92	0.78
K=16	1	0.88	0.89	0.81
K=16	0.98	0.85	0.8	0.84
K=16	0.97	0.91	0.85	0.77
K=16	0.99	0.95	0.92	0.76
K=16	0.98	0.9	0.93	0.74
K=16	0.99	0.91	0.91	0.74
K=16	0.98	0.91	0.82	0.81
K=16	0.97	0.84	0.83	0.79
K=16	1	0.86	0.9	0.83
K=16	0.97	0.92	0.89	0.84
K=16	0.96	0.87	0.9	0.82
K=16	0.95	0.94	0.89	0.8
K=16	0.98	0.89	0.9	0.81
K=16	0.97	0.92	0.86	0.79
K=16	0.98	0.93	0.88	0.82
K=16	0.95	0.95	0.87	0.84
K=16	0.98	0.87	0.86	0.81
K=16	0.97	0.91	0.91	0.85
K=16	0.97	0.93	0.9	0.83
K=16	0.97	0.94	0.95	0.84
K=16	0.99	0.93	0.86	0.78
K=16	0.98	0.94	0.85	0.82
K=16	0.99	0.9	0.92	0.79
K=16	0.98	0.91	0.87	0.86
K=16	0.97	0.94	0.87	0.81
K=16	1	0.87	0.88	0.81
K=16	1	0.89	0.92	0.82
K=16	0.98	0.95	0.89	0.77
K=16	1	0.9	0.84	0.8
K=16	1	0.95	0.92	0.77
K=16	0.96	0.94	0.87	0.86
K=16	0.97	0.88	0.9	0.84
K=16	0.98	0.88	0.92	0.87
K=16	0.97	0.9	0.84	0.84
K=16	1	0.93	0.88	0.86
K=16	1	0.94	0.9	0.75
K=16	0.99	0.97	0.94	0.83
K=16	0.95	0.91	0.92	0.77
K=16	1	0.92	0.95	0.8
K=16	0.98	0.91	0.89	0.73
K=16	0.98	0.91	0.84	0.8
K=16	0.99	0.93	0.89	0.76
K=16	0.97	0.93	0.88	0.72
K=16	0.96	0.91	0.87	0.86
K=16	1	0.9	0.88	0.82
K=16	1	0.94	0.9	0.8
K=16	0.99	0.87	0.89	0.82
K=16	0.99	0.89	0.87	0.82
K=16	1	0.92	0.86	0.83
K=16	1	0.92	0.88	0.82
K=16	0.99	0.93	0.9	0.73
K=16	0.99	0.88	0.9	0.8
K=16	0.98	0.94	0.91	0.78
K=16	0.98	0.87	0.79	0.78
K=16	1	0.92	0.82	0.82
K=16	1	0.86	0.83	0.8
K=16	0.95	0.89	0.9	0.84
K=16	1	0.89	0.9	0.78
K=16	0.98	0.95	0.92	0.77
K=16	0.97	0.89	0.89	0.85
K=16	0.98	0.94	0.86	0.82
K=16	0.97	0.89	0.83	0.74
K=16	0.98	0.91	0.87	0.77
K=16	1	0.93	0.92	0.83
K=16	0.97	0.9	0.91	0.78
K=16	0.99	0.89	0.9	0.84
K=16	1	0.91	0.91	0.73
K=16	0.99	0.88	0.81	0.86
K=16	0.97	0.9	0.87	0.88
K=16	0.97	0.9	0.88	0.85
K=16	0.99	0.9	0.89	0.81
K=16	0.99	0.93	0.86	0.79
K=16	0.99	0.91	0.88	0.79
K=16	0.98	0.87	0.83	0.78
K=16	0.99	0.9	0.86	0.75
K=16	1	0.92	0.87	0.79
K=16	0.98	0.9	0.89	0.77
K=16	0.99	0.9	0.88	0.78
K=16	0.98	0.95	0.85	0.84
K=16	0.96	0.9	0.91	0.83
K=16	0.98	0.89	0.9	0.77
K=16	0.99	0.89	0.87	0.85
K=16	0.98	0.92	0.86	0.83
K=16	0.96	0.97	0.85	0.82
K=16	0.99	0.92	0.87	0.72
K=16	0.97	0.89	0.84	0.84
K=16	0.99	0.88	0.87	0.82
K=16	0.97	0.88	0.86	0.83
K=16	0.97	0.94	0.85	0.81
K=16	0.99	0.89	0.86	0.8
K=16	0.98	0.92	0.88	0.8
K=16	1	0.89	0.86	0.82
K=16	1	0.91	0.88	0.77
K=16	1	0.93	0.93	0.81
K=16	0.98	0.94	0.89	0.86
K=16	0.99	0.91	0.93	0.78
K=16	1	0.92	0.85	0.78
K=16	0.98	0.89	0.88	0.78
K=16	1	0.93	0.86	0.78
K=16	0.99	0.93	0.88	0.81
K=16	0.97	0.87	0.82	0.83
K=16	1	0.9	0.86	0.81
K=16	0.97	0.91	0.9	0.78
K=16	0.97	0.95	0.89	0.75
K=16	0.98	0.94	0.87	0.8
K=16	0.99	0.97	0.89	0.78
K=16	1	0.9	0.92	0.78
K=16	0.96	0.95	0.85	0.8
K=16	0.98	0.89	0.89	0.81
K=16	0.99	0.96	0.89	0.81
K=16	0.99	0.9	0.85	0.81
K=16	0.98	0.9	0.88	0.81
K=16	0.98	0.92	0.87	0.87
K=16	0.96	0.9	0.86	0.75
K=16	0.98	0.91	0.85	0.84
K=16	1	0.92	0.91	0.84
K=16	1	0.87	0.86	0.82
K=16	1	0.93	0.84	0.85
K=16	0.99	0.95	0.8	0.74
K=16	1	0.93	0.82	0.88
K=16	1	0.83	0.86	0.73
K=16	0.96	0.91	0.79	0.83
K=16	1	0.97	0.87	0.83
K=16	0.98	0.92	0.88	0.77
K=16	0.99	0.9	0.89	0.81
K=16	0.99	0.96	0.86	0.84
K=16	0.98	0.91	0.85	0.8
K=16	0.98	0.93	0.88	0.84
K=16	1	0.96	0.85	0.88
K=16	0.99	0.9	0.89	0.74
K=16	0.98	0.95	0.89	0.72
K=16	0.97	0.84	0.9	0.73
K=16	0.99	0.88	0.87	0.81
K=16	0.97	0.95	0.91	0.79
K=16	0.97	0.87	0.88	0.81
K=16	0.99	0.92	0.86	0.83
K=16	0.99	0.89	0.88	0.76
K=16	0.96	0.9	0.84	0.79
K=16	0.96	0.96	0.87	0.8
K=16	0.98	0.88	0.79	0.82
K=16	0.98	0.88	0.92	0.78
K=16	0.99	0.87	0.86	0.88
K=16	0.97	0.94	0.88	0.82
K=16	0.98	0.9	0.89	0.86
K=16	0.98	0.96	0.89	0.81
K=16	0.98	0.92	0.85	0.82
K=16	1	0.94	0.93	0.78
K=16	0.97	0.89	0.91	0.75
K=16	0.99	0.88	0.8	0.82
K=16	0.96	0.91	0.83	0.78
K=16	0.97	0.87	0.81	0.86
K=16	0.97	0.94	0.91	0.87
K=16	0.98	0.88	0.86	0.81
K=16	0.98	0.9	0.88	0.8
K=16	0.99	0.92	0.9	0.86
K=16	1	0.87	0.88	0.84
K=16	0.98	0.91	0.83	0.8
K=16	0.96	0.88	0.87	0.81
K=16	1	0.92	0.84	0.78
K=16	0.99	0.94	0.85	0.82
K=16	0.97	0.92	0.85	0.87
K=16	0.97	0.91	0.88	0.83
K=16	0.98	0.97	0.85	0.73
K=16	0.98	0.91	0.84	0.8
K=16	0.98	0.91	0.88	0.77
K=16	1	0.93	0.84	0.81
K=16	0.99	0.94	0.88	0.81
K=16	0.99	0.96	0.85	0.78
K=16	1	0.93	0.81	0.86
K=16	0.97	0.92	0.92	0.75
K=16	1	0.93	0.87	0.85
K=16	0.97	0.93	0.9	0.83
K=16	0.99	0.92	0.85	0.86
K=16	1	0.92	0.87	0.76
K=16	1	0.89	0.87	0.79
K=16	0.98	0.88	0.82	0.83
K=16	1	0.89	0.88	0.85
K=16	1	0.91	0.9	0.78
K=16	0.97	0.92	0.85	0.88
K=16	0.95	0.92	0.85	0.79
K=16	1	0.91	0.87	0.81
K=16	0.98	0.93	0.88	0.88
K=16	0.97	0.91	0.82	0.81
K=16	0.99	0.93	0.97	0.83
K=16	1	0.89	0.83	0.72
K=16	1	0.9	0.87	0.77
K=16	0.97	0.92	0.82	0.8
K=16	0.94	0.9	0.9	0.82
K=16	0.94	0.91	0.88	0.85
K=16	0.96	0.95	0.88	0.86
K=16	0.97	0.87	0.88	0.76
K=16	0.99	0.95	0.94	0.75
K=16	0.97	0.81	0.87	0.79
K=16	0.97	0.91	0.91	0.82
K=16	0.97	0.83	0.87	0.74
K=16	0.98	0.91	0.82	0.79
K=16	0.97	0.96	0.86	0.87
K=16	0.97	0.93	0.86	0.8
K=16	0.97	0.86	0.91	0.82
K=16	0.98	0.93	0.83	0.75
K=16	1	0.91	0.78	0.83
K=16	0.98	0.92	0.86	0.8
K=16	1	0.97	0.91	0.81
K=16	0.95	0.9	0.84	0.81
K=16	0.95	0.94	0.86	0.85
K=16	0.96	0.91	0.89	0.74
K=16	0.99	0.89	0.82	0.88
K=16	0.99	0.9	0.84	0.87
K=16	0.97	0.91	0.88	0.82
K=16	1	0.95	0.88	0.84
K=16	0.98	0.91	0.84	0.83
K=16	0.96	0.94	0.87	0.9
K=16	0.99	0.89	0.87	0.73
K=16	0.98	0.89	0.82	0.83
K=16	0.99	0.92	0.87	0.74
K=16	1	0.9	0.91	0.81
K=16	0.96	0.85	0.88	0.74
K=16	0.97	0.88	0.9	0.86
K=16	0.99	0.9	0.84	0.82
K=16	0.95	0.93	0.91	0.79
K=16	1	0.92	0.91	0.74
K=16	0.95	0.9	0.78	0.81
K=16	0.99	0.96	0.91	0.79
K=16	0.98	0.89	0.92	0.79
K=16	0.97	0.91	0.86	0.8
K=16	0.97	0.91	0.85	0.79
K=16	0.97	0.87	0.92	0.84
K=16	0.96	0.91	0.9	0.77
K=16	0.98	0.87	0.92	0.81
K=16	1	0.89	0.86	0.8
K=16	0.99	0.9	0.92	0.82
K=16	0.95	0.89	0.88	0.85
K=16	0.99	0.92	0.86	0.79
K=16	1	0.93	0.91	0.77
K=16	0.99	0.92	0.86	0.81
K=16	0.99	0.89	0.82	0.84
K=16	0.99	0.91	0.84	0.81
K=16	0.97	0.93	0.86	0.82
K=16	0.97	0.9	0.93	0.84
K=16	0.99	0.92	0.87	0.86
K=16	0.99	0.83	0.88	0.83
K=16	0.97	0.93	0.91	0.72
K=16	0.99	0.93	0.9	0.81
K=16	0.98	0.91	0.86	0.78
K=16	0.98	0.9	0.85	0.79
K=16	0.96	0.93	0.86	0.82
K=16	1	0.93	0.87	0.74
K=16	0.98	0.91	0.85	0.72
K=16	0.99	0.94	0.89	0.85
K=16	0.98	0.91	0.92	0.84
K=16	0.99	0.91	0.84	0.87
K=16	0.98	0.83	0.79	0.87
K=16	0.99	0.93	0.89	0.85
K=16	0.97	0.96	0.86	0.79
K=16	0.99	0.88	0.87	0.8
K=16	0.99	0.95	0.81	0.76
K=16	0.95	0.9	0.87	0.83
K=16	1	0.9	0.87	0.85
K=16	0.97	0.95	0.84	0.84
K=16	0.97	0.93	0.92	0.81
K=16	0.98	0.92	0.86	0.72
K=16	0.98	0.89	0.87	0.81
K=16	1	0.87	0.87	0.8
K=16	0.98	0.9	0.88	0.82
K=16	0.95	0.91	0.87	0.79
K=16	0.96	0.92	0.86	0.83
K=16	1	0.95	0.86	0.82
K=16	1	0.94	0.86	0.82
K=16	0.95	0.9	0.89	0.84
K=16	1	0.88	0.88	0.77
K=16	0.97	0.94	0.9	0.78
K=16	0.98	0.9	0.86	0.8
K=16	0.97	0.92	0.87	0.83
K=16	0.98	0.84	0.85	0.79
K=16	0.98	0.86	0.82	0.8
K=16	1	0.9	0.87	0.82
K=16	0.99	0.9	0.85	0.78
K=16	0.96	0.86	0.91	0.87
K=16	0.99	0.9	0.93	0.79
K=16	0.98	0.9	0.88	0.72
K=16	0.99	0.87	0.82	0.87
K=16	1	0.93	0.83	0.9
K=16	0.98	0.88	0.88	0.76
K=16	0.97	0.97	0.83	0.87
K=16	0.95	0.89	0.86	0.83
K=16	0.98	0.92	0.89	0.81
K=16	0.99	0.88	0.85	0.8
K=16	0.94	0.89	0.91	0.81
K=16	0.98	0.93	0.91	0.85
K=16	1	0.92	0.8	0.74
K=16	0.98	0.89	0.84	0.81
K=16	0.99	0.88	0.86	0.8
K=16	0.96	0.92	0.86	0.82
K=16	0.97	0.9	0.93	0.83
K=16	0.98	0.88	0.83	0.76
K=16	1	0.88	0.82	0.82
K=16	1	0.9	0.87	0.77
K=16	1	0.94	0.85	0.79
K=16	0.96	0.93	0.9	0.86
K=16	0.97	0.94	0.84	0.79
K=16	0.95	0.9	0.84	0.8
K=16	1	0.93	0.86	0.92
K=16	1	0.92	0.9	0.78
K=16	1	0.93	0.84	0.76
K=16	0.97	0.91	0.89	0.74
K=16	0.97	0.92	0.91	0.77
K=16	1	0.92	0.84	0.84
K=16	0.99	0.9	0.88	0.81
K=16	0.96	0.96	0.93	0.82
K=16	0.95	0.91	0.81	0.76
K=16	0.98	0.9	0.86	0.76
K=16	1	0.9	0.9	0.86
K=16	0.99	0.91	0.87	0.77
K=16	0.98	0.92	0.89	0.83
K=16	0.99	0.96	0.83	0.83
K=16	0.99	0.91	0.82	0.84
K=16	0.98	0.91	0.9	0.84
K=16	1	0.94	0.87	0.86
K=16	0.99	0.94	0.84	0.77
K=16	0.99	0.88	0.85	0.85
K=16	0.96	0.9	0.88	0.82
K=16	0.99	0.93	0.9	0.82
K=16	0.97	0.91	0.83	0.78
K=16	0.98	0.9	0.85	0.8
K=16	1	0.93	0.88	0.84
K=16	0.97	0.89	0.92	0.85
K=16	0.99	0.89	0.88	0.8
K=16	0.99	0.88	0.93	0.83
K=16	0.97	0.87	0.9	0.77
K=16	1	0.91	0.82	0.81
K=16	0.98	0.89	0.89	0.83
K=16	1	0.91	0.86	0.73
K=16	0.99	0.96	0.82	0.77
K=16	0.95	0.88	0.87	0.81
K=16	0.99	0.91	0.86	0.8
K=16	0.99	0.87	0.9	0.81
K=16	0.94	0.88	0.87	0.84
K=16	0.97	0.94	0.9	0.83
K=16	1	0.91	0.85	0.81
K=16	0.94	0.91	0.87	0.78
K=16	0.99	0.87	0.93	0.81
K=16	0.99	0.93	0.88	0.82
K=16	0.99	0.96	0.89	0.74
K=16	0.98	0.92	0.87	0.79
K=16	0.97	0.92	0.82	0.75
K=16	0.99	0.97	0.81	0.83
K=16	1	0.9	0.88	0.73
K=16	0.98	0.89	0.83	0.78
K=16	0.99	0.89	0.86	0.87
K=16	0.99	0.92	0.92	0.84
K=16	0.98	0.91	0.86	0.78
K=16	0.99	0.96	0.81	0.84
K=16	0.98	0.92	0.91	0.77
K=16	0.98	0.89	0.83	0.71
K=16	0.97	0.89	0.91	0.8
K=16	1	0.88	0.84	0.85
K=16	1	0.89	0.9	0.79
K=16	0.98	0.94	0.9	0.79
K=16	0.98	0.92	0.9	0.8
K=16	0.98	0.88	0.86	0.82
K=16	0.96	0.93	0.84	0.76
K=16	0.97	0.87	0.85	0.83
K=16	1	0.91	0.84	0.79
K=16	1	0.95	0.81	0.78
K=16	0.97	0.86	0.87	0.81
K=16	0.99	0.9	0.82	0.83
K=16	1	0.9	0.88	0.81
K=16	1	0.92	0.86	0.8
K=16	0.98	0.93	0.84	0.81
K=16	0.98	0.9	0.83	0.84
K=16	0.98	0.89	0.86	0.83
K=16	0.97	0.89	0.88	0.82
K=16	0.99	0.88	0.81	0.8
K=16	1	0.94	0.84	0.8
K=16	0.97	0.93	0.93	0.92
K=16	1	0.87	0.9	0.75
K=16	0.95	0.94	0.87	0.8
K=16	0.98	0.87	0.83	0.74
K=16	0.98	0.88	0.81	0.84
K=16	0.99	0.93	0.85	0.76
K=16	0.99	0.9	0.85	0.88
K=16	0.97	0.9	0.83	0.89
K=16	0.97	0.92	0.89	0.78
K=16	1	0.9	0.8	0.79
K=16	0.98	0.85	0.85	0.77
K=16	0.96	0.93	0.83	0.85
K=16	1	0.92	0.92	0.84
K=16	0.97	0.88	0.91	0.81
K=16	0.99	0.91	0.91	0.81
K=16	0.98	0.9	0.94	0.83
K=16	1	0.9	0.89	0.86
K=16	0.98	0.85	0.89	0.77
K=16	0.99	0.94	0.82	0.77
K=16	1	0.93	0.89	0.84
K=16	0.99	0.89	0.87	0.74
K=16	1	0.97	0.9	0.87
K=16	0.98	0.87	0.87	0.8
K=16	0.98	0.93	0.87	0.82
K=16	0.95	0.87	0.89	0.79
K=16	0.99	0.91	0.9	0.89
K=16	0.97	0.9	0.86	0.85
K=16	0.99	0.9	0.83	0.77
K=16	1	0.83	0.81	0.85
K=16	0.98	0.88	0.93	0.89
K=16	0.98	0.91	0.87	0.84
K=16	0.97	0.93	0.82	0.77
K=16	0.95	0.93	0.85	0.77
K=16	0.98	0.92	0.91	0.81
K=16	0.98	0.91	0.91	0.79
K=16	0.97	0.89	0.9	0.87
K=16	0.99	0.88	0.89	0.88
K=16	1	0.88	0.86	0.83
K=16	0.98	0.88	0.86	0.84
K=16	0.98	0.84	0.88	0.83
K=16	0.98	0.9	0.87	0.9
K=16	0.98	0.93	0.88	0.81
K=16	0.98	0.88	0.91	0.77
K=16	0.98	0.89	0.84	0.76
K=16	0.98	0.87	0.84	0.82
K=16	0.97	0.9	0.82	0.84
K=16	0.97	0.9	0.85	0.87
K=16	1	0.91	0.84	0.82
K=16	0.97	0.81	0.82	0.83
K=16	0.99	0.94	0.89	0.78
K=16	0.98	0.91	0.84	0.77
K=16	0.99	0.89	0.83	0.88
K=16	0.98	0.93	0.89	0.74
K=16	1	0.89	0.83	0.79
K=16	0.97	0.9	0.88	0.79
K=16	0.97	0.94	0.88	0.8
K=16	0.96	0.95	0.86	0.83
K=16	0.99	0.92	0.86	0.78
K=16	0.96	0.92	0.9	0.74
K=16	0.97	0.95	0.84	0.82
K=16	0.99	0.91	0.85	0.84
K=16	0.97	0.91	0.82	0.86
K=16	0.97	0.9	0.88	0.81
K=16	0.98	0.88	0.92	0.82
K=16	0.99	0.93	0.83	0.81
K=16	1	0.95	0.9	0.82
K=16	0.99	0.93	0.84	0.83
K=16	1	0.89	0.91	0.81
K=16	0.97	0.9	0.9	0.85
K=16	0.98	0.93	0.86	0.76
K=16	0.99	0.89	0.85	0.81
K=16	0.99	0.91	0.89	0.77
K=16	0.99	0.93	0.88	0.79
K=16	0.96	0.88	0.93	0.81
K=16	1	0.89	0.88	0.86
K=16	0.97	0.89	0.88	0.78
K=16	1	0.9	0.85	0.8
K=16	0.97	0.91	0.87	0.78
K=16	0.98	0.92	0.88	0.8
K=16	0.99	0.97	0.78	0.77
K=16	0.97	0.88	0.85	0.79
K=16	0.97	0.85	0.92	0.76
K=16	0.96	0.93	0.91	0.79
K=16	0.98	0.94	0.87	0.79
K=16	0.96	0.91	0.83	0.82
K=16	0.99	0.88	0.88	0.87
K=16	1	0.92	0.89	0.87
K=16	0.97	0.88	0.86	0.8
K=16	0.92	0.89	0.84	0.84
K=16	0.98	0.95	0.87	0.81
K=16	0.99	0.92	0.89	0.82
K=16	0.98	0.88	0.85	0.77
K=16	0.98	0.93	0.84	0.91
K=16	1	0.93	0.89	0.87
K=16	0.99	0.88	0.84	0.89
K=16	0.98	0.9	0.87	0.83
K=16	0.96	0.85	0.83	0.85
K=16	0.98	0.87	0.87	0.82
K=16	1	0.91	0.84	0.84
K=16	1	0.88	0.95	0.83
K=16	1	0.9	0.86	0.82
K=16	0.98	0.85	0.9	0.73
K=16	1	0.9	0.82	0.86
K=16	0.99	0.93	0.83	0.77
K=16	0.98	0.88	0.87	0.82
K=16	0.98	0.94	0.87	0.83
K=16	0.96	0.92	0.83	0.85
K=16	1	0.93	0.88	0.79
K=16	0.99	0.9	0.88	0.84
K=16	0.98	0.93	0.91	0.82
K=16	1	0.94	0.88	0.79
K=16	0.97	0.88	0.84	0.82
K=16	0.98	0.92	0.86	0.83
K=16	0.97	0.97	0.89	0.85
K=16	0.97	0.9	0.84	0.83
K=16	0.98	0.84	0.87	0.82
K=16	1	0.94	0.8	0.83
K=16	0.98	0.92	0.89	0.8
K=16	0.99	0.92	0.84	0.81
K=16	0.99	0.95	0.9	0.75
K=16	1	0.93	0.92	0.79
K=16	1	0.93	0.88	0.8
K=16	1	0.93	0.88	0.84
K=16	0.98	0.92	0.82	0.86
K=16	0.99	0.92	0.85	0.87
K=16	1	0.95	0.91	0.8
K=16	0.96	0.88	0.85	0.76
K=16	1	0.88	0.92	0.8
K=16	0.98	0.84	0.84	0.85
K=16	0.99	0.9	0.84	0.85
K=16	0.98	0.91	0.91	0.81
K=16	0.97	0.93	0.91	0.87
K=16	0.95	0.91	0.88	0.76
K=16	0.98	0.88	0.85	0.82
K=16	0.95	0.91	0.9	0.75
K=16	0.99	0.95	0.89	0.83
K=16	0.99	0.93	0.9	0.8
K=16	0.97	0.93	0.9	0.83
K=16	0.98	0.91	0.79	0.85
K=16	0.99	0.89	0.86	0.77
K=16	0.97	0.91	0.89	0.82
K=16	1	0.9	0.91	0.8
K=16	0.99	0.94	0.8	0.88
K=16	0.98	0.97	0.9	0.76
K=16	0.96	0.89	0.94	0.77
K=16	0.98	0.88	0.82	0.71
K=16	0.98	0.88	0.82	0.8
K=16	0.97	0.89	0.91	0.81
K=16	0.98	0.91	0.91	0.87
K=16	0.95	0.95	0.82	0.9
K=16	0.97	0.92	0.87	0.76
K=16	0.98	0.9	0.94	0.81
K=16	0.99	0.92	0.85	0.79
K=16	0.97	0.9	0.88	0.85
K=16	1	0.91	0.88	0.83
K=16	0.97	0.86	0.83	0.86
K=16	0.99	0.89	0.84	0.75
K=16	0.96	0.92	0.87	0.84
K=16	0.96	0.93	0.86	0.81
K=16	0.97	0.9	0.81	0.79
K=16	0.98	0.91	0.85	0.79
K=16	1	0.92	0.87	0.76
K=16	1	0.93	0.89	0.84
K=16	0.94	0.94	0.86	0.79
K=16	1	0.85	0.88	0.84
K=16	0.97	0.95	0.81	0.85
K=16	1	0.92	0.87	0.85
K=16	0.99	0.86	0.92	0.85
K=16	0.99	0.9	0.92	0.79
K=16	0.97	0.93	0.94	0.84
K=16	0.98	0.9	0.91	0.88
K=16	0.97	0.91	0.9	0.85
K=16	1	0.88	0.92	0.77
K=16	0.96	0.87	0.9	0.86
K=16	0.99	0.91	0.92	0.82
K=16	1	0.95	0.91	0.73
K=16	0.98	0.88	0.85	0.86
K=16	0.99	0.88	0.86	0.8
K=16	0.98	0.88	0.88	0.85
K=16	0.99	0.92	0.87	0.84
K=16	0.99	0.88	0.8	0.8
K=16	0.94	0.94	0.88	0.81
K=16	1	0.91	0.91	0.8
K=16	0.96	0.93	0.86	0.91
K=16	1	0.92	0.9	0.77
K=16	0.99	0.96	0.92	0.85
K=16	0.99	0.9	0.85	0.87
K=16	0.97	0.94	0.91	0.81
K=16	0.99	0.88	0.81	0.79
K=16	1	0.98	0.89	0.82
K=16	0.99	0.89	0.89	0.82
K=16	0.99	0.93	0.85	0.8
K=16	0.94	0.91	0.84	0.83
K=16	0.99	0.94	0.87	0.84
K=16	0.99	0.94	0.91	0.77
K=16	1	0.89	0.85	0.79
K=16	0.98	0.87	0.93	0.88
K=16	0.97	0.93	0.95	0.81
K=16	0.98	0.91	0.87	0.76
K=16	0.99	0.91	0.92	0.76
K=16	0.99	0.95	0.83	0.8
K=16	1	0.97	0.87	0.86
K=16	0.99	0.93	0.85	0.91
K=16	0.98	0.97	0.83	0.8
K=16	0.97	0.87	0.9	0.85
K=16	0.98	0.87	0.87	0.82
K=16	0.99	0.93	0.82	0.76
K=16	0.99	0.96	0.91	0.82
K=16	0.99	0.95	0.94	0.87
K=16	0.97	0.88	0.81	0.83
K=16	1	0.92	0.87	0.83
K=16	0.96	0.92	0.85	0.83
K=16	0.96	0.9	0.9	0.86
K=16	0.95	0.9	0.89	0.83
K=16	0.97	0.92	0.84	0.84
K=16	0.96	0.92	0.82	0.85
K=16	0.97	0.93	0.9	0.8
K=16	0.96	0.91	0.88	0.8
K=16	0.99	0.95	0.87	0.79
K=16	0.99	0.91	0.86	0.85
K=16	1	0.91	0.93	0.78
K=16	1	0.94	0.86	0.78
K=16	0.98	0.94	0.9	0.82
K=16	0.98	0.96	0.91	0.8
K=16	1	0.92	0.93	0.8
K=16	0.97	0.93	0.84	0.88
K=16	0.99	0.9	0.82	0.81
K=16	0.95	0.92	0.9	0.79
K=16	0.98	0.89	0.87	0.82
K=16	0.96	0.94	0.91	0.77
K=16	0.98	0.91	0.84	0.87
K=16	1	0.92	0.89	0.83
K=16	0.99	0.91	0.91	0.82
K=16	1	0.89	0.83	0.74
K=16	0.98	0.9	0.88	0.86
K=16	0.97	0.91	0.88	0.76
K=16	0.99	0.93	0.89	0.88
K=16	0.99	0.92	0.89	0.75
K=16	0.99	0.84	0.87	0.8
K=16	0.98	0.93	0.84	0.78
K=16	0.98	0.88	0.89	0.77
K=16	1	0.92	0.89	0.72
K=16	0.99	0.91	0.87	0.76
K=16	0.96	0.88	0.82	0.75
K=16	0.99	0.91	0.93	0.78
K=16	0.96	0.9	0.84	0.77
K=16	0.99	0.92	0.86	0.8
K=16	0.98	0.92	0.89	0.83
K=16	0.97	0.89	0.79	0.81
K=16	0.99	0.87	0.9	0.76
K=16	1	0.9	0.87	0.84
K=16	0.98	0.93	0.87	0.78
K=16	0.97	0.9	0.86	0.74
K=16	0.95	0.92	0.88	0.9
K=16	0.99	0.93	0.86	0.82
K=16	0.98	0.96	0.79	0.83
K=16	0.97	0.95	0.94	0.84
K=16	0.98	0.92	0.92	0.81
K=16	1	0.88	0.91	0.86
K=16	0.98	0.87	0.9	0.82
K=16	0.98	0.91	0.9	0.74
K=16	0.97	0.95	0.89	0.81
K=16	0.99	0.92	0.88	0.73
K=16	0.97	0.9	0.85	0.85
K=16	0.98	0.89	0.93	0.82
K=16	1	0.94	0.87	0.79
K=16	1	0.95	0.84	0.82
K=16	0.96	0.92	0.87	0.79
K=16	0.98	0.9	0.89	0.84
K=16	0.99	0.9	0.92	0.77
K=16	0.99	0.97	0.83	0.77
K=16	0.98	0.89	0.84	0.87
K=16	0.98	0.9	0.87	0.77
K=16	0.96	0.9	0.9	0.85
K=16	1	0.89	0.82	0.85
K=16	0.97	0.87	0.91	0.8
K=16	0.99	0.88	0.84	0.82
K=16	0.98	0.85	0.88	0.82
K=16	0.99	0.92	0.82	0.75
K=16	0.97	0.93	0.86	0.82
K=16	0.98	0.91	0.87	0.81
K=16	0.95	0.88	0.91	0.8
K=16	0.98	0.9	0.83	0.83
K=16	0.98	0.92	0.81	0.76
K=16	1	0.87	0.9	0.78
K=16	1	0.89	0.85	0.88
K=16	0.97	0.91	0.9	0.82
K=16	0.97	0.91	0.82	0.87
K=16	0.96	0.87	0.85	0.76
K=16	1	0.93	0.89	0.78
K=16	0.97	0.95	0.87	0.82
K=16	1	0.89	0.86	0.86
K=16	0.97	0.94	0.89	0.77
K=16	0.97	0.92	0.93	0.83
K=16	0.97	0.95	0.88	0.78
K=16	1	0.93	0.89	0.85
K=16	1	0.83	0.8	0.82
K=16	0.97	0.91	0.89	0.86
K=16	0.97	0.92	0.86	0.84
K=16	0.98	0.91	0.85	0.78
K=16	0.95	0.88	0.93	0.81
K=16	1	0.94	0.85	0.81
K=16	1	0.9	0.89	0.82
K=16	0.98	0.93	0.88	0.8
K=16	1	0.88	0.91	0.8
K=16	0.98	0.95	0.86	0.83
K=16	1	0.94	0.89	0.79
K=16	0.97	0.9	0.86	0.82
K=16	0.98	0.9	0.86	0.75
K=16	0.98	0.92	0.84	0.84
K=16	0.97	0.92	0.93	0.84
K=16	0.99	0.95	0.83	0.79
K=16	0.98	0.86	0.87	0.83
K=16	0.99	0.96	0.81	0.79
K=16	0.96	0.91	0.92	0.86
K=16	0.99	0.88	0.86	0.81
K=16	0.99	0.92	0.84	0.87
K=16	0.93	0.88	0.84	0.81
K=16	0.99	0.91	0.86	0.84
K=16	0.98	0.87	0.88	0.81
K=16	0.99	0.92	0.84	0.8
K=16	0.97	0.9	0.88	0.83
K=16	0.98	0.94	0.88	0.82
K=16	0.99	0.91	0.85	0.81
K=16	0.96	0.94	0.85	0.86
K=16	0.98	0.88	0.83	0.82
K=16	1	0.9	0.84	0.8
K=16	1	0.93	0.89	0.81
K=16	0.99	0.91	0.89	0.78
K=16	0.98	0.9	0.92	0.77
K=16	0.99	0.95	0.86	0.79
K=16	0.96	0.92	0.81	0.83
K=16	0.98	0.89	0.9	0.82
K=16	0.96	0.89	0.83	0.81
K=16	0.97	0.93	0.87	0.78
K=16	0.97	0.95	0.89	0.82
K=16	0.98	0.91	0.82	0.84
K=16	1	0.97	0.87	0.72
K=16	1	0.94	0.86	0.8
K=16	0.93	0.91	0.93	0.76
K=16	0.98	0.92	0.87	0.81
K=16	0.99	0.9	0.89	0.82
K=16	0.99	0.94	0.83	0.75
K=16	0.97	0.92	0.89	0.8
K=16	0.97	0.9	0.83	0.86
K=16	1	0.88	0.93	0.85
K=16	0.99	0.9	0.86	0.84
K=16	0.98	0.97	0.84	0.77
K=16	1	0.91	0.82	0.74
K=16	1	0.92	0.88	0.79
K=16	0.98	0.94	0.81	0.84
K=16	0.98	0.94	0.82	0.78
K=16	1	0.96	0.83	0.84
K=16	0.97	0.92	0.86	0.76
K=16	1	0.95	0.82	0.81
K=16	0.98	0.93	0.82	0.86
K=16	0.99	0.91	0.88	0.76
K=16	0.96	0.89	0.89	0.87
K=16	0.99	0.92	0.86	0.77
K=16	0.98	0.94	0.88	0.82
K=16	0.99	0.91	0.96	0.82
K=16	0.97	0.92	0.87	0.82
K=16	0.97	0.95	0.84	0.8
K=16	0.99	0.89	0.87	0.8
K=16	0.95	0.9	0.93	0.8
K=16	0.98	0.9	0.85	0.71
K=16	1	0.89	0.86	0.8
K=16	0.97	0.93	0.87	0.83
K=16	0.98	0.89	0.88	0.8
K=16	0.98	0.88	0.87	0.76
K=16	0.97	0.91	0.89	0.85
K=16	0.97	0.9	0.9	0.79
K=16	0.98	0.89	0.9	0.83
K=16	0.98	0.86	0.88	0.87
K=16	1	0.87	0.88	0.76
K=16	0.98	0.88	0.86	0.79
K=16	0.97	0.87	0.88	0.79
K=16	0.99	0.94	0.86	0.84
K=16	0.97	0.9	0.91	0.85
K=16	0.98	0.91	0.8	0.77
K=16	0.99	0.88	0.85	0.8
K=16	1	0.9	0.83	0.79
K=16	0.98	0.92	0.89	0.83
K=16	0.98	0.95	0.9	0.75
K=16	0.98	0.88	0.83	0.78
K=16	0.99	0.9	0.86	0.87
K=16	0.93	0.94	0.85	0.76
K=16	0.95	0.89	0.87	0.82
K=16	0.98	0.92	0.79	0.77
K=16	0.99	0.9	0.88	0.84
K=16	0.97	0.91	0.9	0.81
K=16	0.99	0.87	0.8	0.81
K=16	0.96	0.86	0.89	0.83
K=16	1	0.95	0.87	0.86
K=16	0.97	0.92	0.85	0.79
K=16	0.99	0.95	0.88	0.81
K=16	0.99	0.96	0.88	0.81
K=16	0.95	0.91	0.85	0.86
K=16	0.97	0.97	0.91	0.82
K=16	1	0.86	0.89	0.8
K=16	0.98	0.94	0.88	0.79
K=16	0.98	0.88	0.85	0.83
K=16	1	0.87	0.94	0.78
K=16	0.99	0.9	0.86	0.81
K=16	0.96	0.92	0.85	0.82
K=16	1	0.93	0.88	0.82
K=16	1	0.95	0.9	0.79
K=16	0.96	0.89	0.87	0.84
K=16	1	0.91	0.9	0.81
K=16	0.98	0.86	0.87	0.8
K=16	0.97	0.95	0.9	0.78
K=16	0.96	0.89	0.76	0.8
K=16	0.97	0.9	0.92	0.83
K=16	0.97	0.97	0.9	0.78
K=16	0.99	0.91	0.87	0.75
K=16	0.99	0.91	0.82	0.77
K=16	0.98	0.9	0.87	0.82
K=16	1	0.96	0.9	0.77
K=16	0.97	0.92	0.88	0.82
K=16	1	0.93	0.88	0.72
K=16	0.99	0.93	0.85	0.87
K=16	0.98	0.89	0.85	0.82
K=16	1	0.86	0.85	0.77
K=16	0.96	0.94	0.89	0.73
K=16	0.96	0.91	0.91	0.84
K=16	0.98	0.97	0.92	0.85
K=16	0.96	0.85	0.94	0.82
K=16	0.98	0.84	0.9	0.82
K=16	1	0.93	0.88	0.76
K=16	0.98	0.93	0.92	0.74
K=16	0.99	0.94	0.86	0.79
K=16	1	0.95	0.84	0.85
K=16	1	0.85	0.88	0.8
K=16	0.96	0.88	0.9	0.85
K=16	0.99	0.93	0.89	0.84
K=16	0.99	0.88	0.84	0.85
K=16	0.96	0.93	0.87	0.75
K=16	0.99	0.93	0.82	0.8
K=16	1	0.89	0.93	0.8
K=16	1	0.93	0.84	0.81
K=16	1	0.92	0.81	0.76
K=16	0.99	0.92	0.93	0.78
K=16	0.95	0.9	0.85	0.86
K=16	0.97	0.84	0.84	0.84
K=16	0.99	0.88	0.91	0.83
K=16	0.99	0.95	0.81	0.89
K=16	1	0.89	0.86	0.8
K=16	1	0.9	0.85	0.83
K=16	0.97	0.86	0.9	0.8
K=16	0.97	0.95	0.94	0.81
K=16	0.99	0.91	0.9	0.78
K=16	1	0.9	0.85	0.86
K=16	1	0.91	0.86	0.87
K=16	0.99	0.93	0.91	0.83
K=16	0.99	0.94	0.9	0.76
K=16	0.97	0.94	0.82	0.81
K=16	0.96	0.97	0.82	0.78
K=16	0.98	0.96	0.86	0.79
K=16	0.98	0.91	0.88	0.73
K=16	1	0.92	0.86	0.85
K=16	0.99	0.91	0.87	0.79
K=16	0.98	0.96	0.87	0.82
K=16	0.98	0.88	0.88	0.81
K=16	0.99	0.92	0.84	0.85
K=16	1	0.91	0.85	0.84
K=16	1	0.93	0.84	0.82
K=16	1	0.9	0.94	0.75
K=16	0.98	0.92	0.88	0.85
K=16	1	0.94	0.83	0.85
K=16	0.97	0.84	0.86	0.74
K=16	0.97	0.88	0.89	0.9
K=16	0.96	0.88	0.88	0.79
K=16	0.99	0.9	0.87	0.84
K=16	0.97	0.92	0.87	0.79
K=16	0.96	0.89	0.88	0.79
K=16	0.98	0.92	0.86	0.81
K=16	0.98	0.93	0.91	0.79
K=16	1	0.92	0.9	0.82
K=16	0.96	0.9	0.81	0.84
K=16	1	0.9	0.87	0.82
K=16	0.95	0.88	0.89	0.84
K=16	0.96	0.96	0.86	0.82
K=16	0.99	0.86	0.88	0.75
K=16	0.98	0.94	0.83	0.75
K=16	0.99	0.91	0.78	0.81
K=16	0.98	0.89	0.84	0.84
K=16	1	0.92	0.89	0.85
K=16	1	0.89	0.88	0.85
K=16	1	0.9	0.87	0.8
K=16	1	0.93	0.95	0.77
K=16	0.99	0.91	0.81	0.86
K=16	0.96	0.9	0.85	0.84
K=16	0.97	0.91	0.89	0.74
K=16	0.97	0.91	0.88	0.74
K=16	1	0.92	0.91	0.84
K=16	0.98	0.95	0.87	0.82
K=16	0.99	0.93	0.85	0.82
K=16	0.99	0.92	0.83	0.76
K=16	0.99	0.92	0.82	0.8
K=16	0.96	0.93	0.84	0.79
K=16	0.98	0.95	0.89	0.85
K=16	1	0.94	0.85	0.84
K=16	1	0.91	0.91	0.75
K=16	0.94	0.96	0.92	0.81
K=16	0.97	0.9	0.88	0.81
K=16	0.96	0.9	0.82	0.86
K=16	1	0.94	0.88	0.79
K=16	1	0.92	0.81	0.84
K=16	0.98	0.91	0.86	0.8
K=16	0.97	0.92	0.87	0.77
K=16	0.99	0.88	0.92	0.75
K=16	0.97	0.9	0.88	0.84
K=16	0.99	0.93	0.83	0.8
K=16	0.95	0.91	0.87	0.78
K=16	0.98	0.96	0.89	0.92
K=16	0.98	0.9	0.84	0.8
K=16	0.95	0.87	0.92	0.79
K=16	1	0.93	0.92	0.83
K=16	0.99	0.88	0.76	0.74
K=16	1	0.93	0.87	0.84
K=16	0.97	0.94	0.85	0.79
K=16	0.99	0.94	0.84	0.79
K=16	0.95	0.87	0.91	0.78
[truncated: 4,003 more rows]
